# Supplementary material for: The longitudinal associations between bone mineral density and appendicular skeletal muscle mass in Chinese community-dwelling middle aged and elderly men
Source: PeerJ. 2021 Jan 19;9:e10753. doi: 10.7717/peerj.10753 (PMC7821753; doi:10.7717/peerj.10753)
Supplement: Supplemental Information 8 [file peerj-09-10753-s008.xlsx]

## Sheet: Raw data
CARD_NO	TIMES	ANALYSIS_DATE	FIRSTTIME	difference	SEX	AGE	thisyear	BIRTHDATE	age_TODAY	MENOPAUSE_YEAR	WEIGHT	HEIGHT	BODY_MASS_INDEX	TOTAL_PERCENT_FAT	ANDROID_GYNOID_RATIO	ANDROID_PERCENT_FAT	GYNOID_PERCENT_FAT	FAT_MASS_RATIO	TRUNK_LIMB_FAT_MASS_RATIO	FAT_MASS_HEIGHT_SQUARED	LEAN_MASS_HEIGHT_SQUARED	APPENDAGE_LEAN_MASS_HEIGHT_2	TOTAL_LEAN_MASS	PURE_LEAN_HEIGHT_SQUARED	APPENDAGE_PURE_LEAN_HEIGHT_2	appendicular lean weight	appendicular lean BMI	truncal fat mass/appendicular skeletal muscle mass	TOTAL_PURE_LEAN	WBTOT_AREA	WBTOT_BMC	WBTOT_BMD（total BMD）	SUBTOT_AREA	SUBTOT_BMC	SUBTOT_BMD（partial BMD）	HEAD_BMD	LARM_BMD	RARM_BMD	LRIB_BMD	RRIB_BMD	T_S_BMD	L_S_BMD	PELV_BMD	LLEG_BMD	RLEG_BMD	HEAD_LEAN	HEAD_PFAT	LARM_LEAN	LARM_PFAT
6395	3	2018-05-23	2016-06-15	707	1	62	2019-02-18	1956-02-04	63	-1	68.5	173.5	22.7558	26.004	1.21005	31.9542	26.4074	0.97798	1.09023	5.95954	16.9582	7.35753	51048	16.2952	7.00239	0.307719	0.926304	11.0822	49052.2	2050.01	1995.83	0.973568	1814.16	1574.22	0.867745	1.78754	0.685165	0.701689	0.493275	0.512663	0.789978	0.9544	1.10432	1.01791	1.04384	3798.81	24.3684	3016.04	26.5619
42585	3	2017-05-10	2015-05-21	720	1	55	2019-02-18	1961-09-05	57	-1	95	181	28.9979	30.6969	1.15103	36.4198	31.6411	1.03825	1.16966	9.02039	20.3649	8.89259	66717.6	19.5015	8.45088	0.291431	0.954757	12.2033	63888.9	2416.97	2828.71	1.17035	2162.53	2145.84	0.992282	2.68382	0.766719	0.82665	0.592271	0.623123	0.930695	1.17523	1.31595	1.14825	1.14803	4598.75	23.8676	4339.34	32.2903
49541	3	2017-03-03	2015-04-03	700	1	46	2019-02-18	1970-03-24	49	-1	68.9	169.5	23.9817	22.2636	1.03604	25.8545	24.9552	0.902346	0.935025	5.31891	18.5717	8.18636	53356.9	17.7634	7.77226	0.324091	0.931123	7.72436	51034.7	2090.86	2322.25	1.11067	1823.28	1718.24	0.942391	2.25732	0.733162	0.817118	0.522105	0.533987	0.801908	0.992916	1.22593	1.14882	1.05412	4389.14	23.778	3266.5	25.588
68575	3	2018-06-27	2015-09-14	1017	1	46	2019-02-18	1972-06-15	47	-1	89.3	175.5	28.9933	28.6847	1.2113	36.2448	29.9223	1.06604	1.20356	8.27793	20.5804	9.17104	63388.3	19.5584	8.62708	0.297554	0.916475	10.6955	60240.4	2361.33	3147.92	1.33312	2101.77	2480.01	1.17997	2.57324	0.889912	0.888177	0.642302	0.701437	0.963994	1.17456	1.64483	1.39088	1.44818	4292.72	23.7774	4137.37	27.4752
74238	3	2017-11-16	2015-11-13	734	2	67	2019-02-18	1950-10-01	68	53	43.5	148	19.8594	29.5691	0.980233	28.7454	29.3251	0.977156	1.06393	5.91539	14.0899	5.86259	30862.5	13.6185	5.62464	0.283223	0.620373	11.3282	29830	1343.47	1032.45	0.768496	1131.24	728.704	0.644166	1.4312	0.535305	0.543714	0.385618	0.437629	0.452591	0.583804	0.8056	0.830159	0.806037	2915.36	24.3035	1687.14	36.5902
76600	3	2017-03-09	2015-03-23	717	1	43	2019-02-18	1973-05-24	46	-1	61	168.5	21.4847	21.6802	1.0449	25.8865	24.7742	1.04652	1.03777	4.68684	16.9313	7.70326	48071.7	16.2141	7.31675	0.340556	0.966914	8.37939	46035.6	1933.18	2036.08	1.05323	1675.55	1526.34	0.91095	1.9786	0.769503	0.83522	0.482609	0.492873	0.665757	0.731116	1.11711	1.12287	1.07929	3781.27	23.8272	3034.69	24.3196
129394	3	2018-09-28	2015-09-30	1094	1	52	2019-02-18	1965-11-27	53	-1	66.4	172.5	22.3146	23.5667	0.914018	24.4588	26.7597	0.823961	0.79321	5.2558	17.046	8.02409	50722.6	16.367	7.62959	0.34191	1.01739	8.45003	48702.1	2014.85	2020.53	1.00282	1777.02	1591.59	0.895653	1.80354	0.713525	0.702104	0.502324	0.487167	0.725124	0.765393	1.04323	1.11922	1.09907	3734.16	24.135	3411.73	22.7624
343041	3	2017-06-06	2015-06-05	732	1	83	2019-02-18	1937-03-12	82	-1	64.8	168	22.9592	29.0005	1.21459	32.9327	27.1143	1.13691	1.31059	6.774	16.5842	7.17493	46807.2	15.8203	6.76629	0.294709	0.831788	12.7811	44651.4	1991.71	2155.88	1.08243	1771.91	1726.73	0.974504	1.95249	0.727673	0.772039	0.596385	0.61328	1.01021	1.34906	1.19535	1.09869	1.14103	3380.52	24.0138	2863.59	30.3889
409830	3	2018-09-03	2016-09-01	732	1	56	2019-02-18	1961-11-05	57	-1	75.7	180.5	23.2349	22.5217	1.1186	25.271	22.5916	1.01688	1.07276	5.26642	18.1173	8.19658	59026.7	17.4927	7.83395	0.337163	1.09848	9.33366	56991.8	2213.57	2034.99	0.919325	1959.54	1722.39	0.878977	1.23056	0.692566	0.7165	0.577099	0.573584	0.809881	0.844319	1.00579	1.04561	1.0457	3987.61	24.8113	3327.29	24.252
490207	3	2018-05-07	2016-06-21	685	1	42	2019-02-18	1975-08-14	44	-1	67.5	173	22.5534	20.9753	1.00783	24.3568	24.1676	0.905581	0.989972	4.68654	17.6566	7.92242	52844.3	16.8142	7.49698	0.33241	0.994871	8.05119	50323.1	2105.32	2521.19	1.19753	1852.87	1912.29	1.03207	2.41199	0.852123	0.791441	0.60391	0.580753	0.905498	1.07508	1.39417	1.19722	1.20191	3770.7	23.3241	3514.7	19.5739
491688	3	2017-07-12	2015-04-14	820	1	44	2019-02-18	1972-09-05	46	-1	85	178	26.8274	22.4327	1.07343	26.69	24.8642	0.982271	1.05515	6.12319	21.1726	9.45958	67083.4	20.3485	8.99269	0.335205	1.06206	7.77649	64472.2	2400.24	2611.23	1.0879	2119.13	2094.39	0.988324	1.83855	0.765874	0.824781	0.570858	0.572241	0.821809	0.828681	1.24455	1.19634	1.20167	4578.52	24.0983	4164.31	24.3125
526343	3	2018-08-07	2016-08-04	733	1	54	2019-02-18	1963-08-05	56	0	67.4	167.5	24.0232	24.9548	1.02521	26.9363	26.2738	1.03783	1.09304	5.94674	17.8833	7.83336	50173.8	17.1531	7.43368	0.309438	0.868166	9.38677	48125.1	1912.92	2048.67	1.07097	1682.6	1603.01	0.9527	1.93493	0.764631	0.780368	0.592495	0.615954	0.878923	0.95263	1.08217	1.13842	1.14831	3803.21	24.3089	3707.7	27.7508
618523	3	2018-04-27	2016-06-02	694	1	52	2019-02-18	1966-04-15	53	0	64.7	167.5	23.0608	19.8809	1.18602	22.7029	19.1422	1.14274	1.2551	4.59282	18.5089	8.3389	51929.1	17.6492	7.90291	0.342699	0.961484	7.40183	49517.2	2070.95	2411.93	1.16465	1813.76	1836.86	1.01274	2.23598	0.7815	0.813784	0.61078	0.601442	0.909161	1.06406	1.26355	1.21395	1.23506	3693.19	23.4138	3203.73	19.1409
1234684	3	2018-10-11	2015-05-27	1233	1	51	2019-02-18	1967-02-23	52	-1	67.5	173.5	22.4236	23.6896	1.11195	29.2519	26.3068	0.911539	1.01553	5.3688	17.2943	7.56158	52059.6	16.4964	7.15292	0.318991	0.960236	9.58569	49657.9	2143.25	2401.73	1.1206	1908.58	1962.12	1.02806	1.87329	0.800535	0.858192	0.591067	0.621275	1.02917	1.1499	1.45948	1.18279	1.07545	3685.77	24.0615	3085.74	25.5754
1247260	3	2017-06-08	2015-06-08	731	1	84	2019-02-18	1932-09-09	87	-1	63	158	25.2363	29.7055	1.14503	34.4301	30.069	1.18967	1.15529	7.46214	17.6583	7.8392	44082.1	16.8671	7.46113	0.29565	0.738061	10.5562	42107	1857.52	1975.16	1.06333	1607.06	1328.62	0.82674	2.58142	0.696564	0.709757	0.49066	0.476475	0.724677	0.998741	0.990943	0.999966	1.01277	4538.52	24.2562	2703.49	36.4087
1283096	3	2017-06-07	2015-06-04	734	1	79	2019-02-18	1937-10-28	81	-1	59.2	164	22.0107	32.3407	1.20776	38.7247	32.0631	1.01975	1.15477	7.1219	14.8996	6.22161	40074	14.2882	5.90845	0.268435	0.721984	14.9313	38429.6	1707.01	1644.32	0.963278	1478.85	1188.09	0.803387	1.99964	0.604603	0.713709	0.468655	0.505535	0.768014	0.808528	1.00158	0.885869	0.992533	3630.63	24.8937	2088.32	40.9743
1289441	3	2017-09-30	2015-03-07	938	1	15	2019-02-18	2002-01-03	17	-1	53	161.5	20.3203	19.0913	1.28207	25.2453	19.6911	1.05557	1.08388	3.94704	16.7275	7.73671	43629	16.0429	7.38126	0.363245	0.947425	6.82566	41843.4	1736.87	1785.64	1.02808	1484.42	1390.92	0.937009	1.56356	0.672637	0.718675	0.535593	0.581379	0.704236	0.932109	1.14809	1.14534	1.14878	3483.58	24.0706	2922.45	17.7527
1338749	3	2017-04-26	2015-06-11	685	1	59	2019-02-18	1957-09-15	61	-1	79.7	179.5	24.736	26.6389	1.22792	31.2741	25.4692	1.3107	1.49594	6.56281	18.0734	7.9303	58233	17.3085	7.53949	0.304798	0.982067	12.5989	55768.4	2210.71	2464.57	1.11483	1955.87	1882.96	0.96272	2.28229	0.775056	0.758343	0.615973	0.597478	0.911646	1.02557	1.21019	1.15612	1.12067	4327.69	24.0204	3183.23	28.1723
1381472	3	2018-05-03	2015-04-21	1108	1	54	2019-02-18	1963-10-14	55	-1	73.6	172.5	24.7343	24.0318	1.16757	28.9178	24.7675	1.03955	1.09851	5.85303	18.5023	8.23542	55055.9	17.7793	7.89264	0.319097	0.949513	9.15178	52904.4	2186.31	2151.43	0.984046	1928.73	1565.62	0.81174	2.27423	0.670945	0.677375	0.537958	0.572234	0.806451	0.991021	0.998898	0.93955	0.920205	4343.56	23.9536	3192.26	24.5204
1429022	3	2017-06-06	2015-06-04	733	1	82	2019-02-18	1935-03-05	84	-1	62.5	172.5	21.004	23.8598	1.33492	28.5576	21.3928	1.15142	1.24042	4.80904	15.3463	6.69399	45664.9	14.6383	6.31642	0.300725	0.894844	11.7213	43558.2	2006.44	2106.7	1.04997	1754.79	1606.17	0.915307	1.98898	0.742211	0.769547	0.588683	0.586392	0.822486	0.943149	1.01108	1.10334	1.10444	3877.79	24.0401	2526.6	25.1503
1633143	3	2018-07-13	2015-07-03	1106	1	56	2019-02-18	1961-12-18	57	-1	76.7	171	26.2303	24.7887	1.30724	31.8815	24.3884	1.15431	1.2865	6.48635	19.6803	8.83199	57547.1	18.8748	8.38272	0.319582	0.934489	9.20454	55191.9	2244.78	2355.16	1.04917	1996.68	1892.85	0.948001	1.86339	0.78076	0.778534	0.626248	0.572645	0.993084	0.924758	1.12276	1.13334	1.08219	3928.12	24.2832	3630.75	23.8466
1792717	3	2017-08-25	2014-09-16	1074	2	50	2019-02-18	1966-12-13	52	50	57	162	21.7193	30.3938	0.839685	29.132	34.6939	0.773496	0.750981	6.70888	15.3643	6.41479	40322.1	14.6266	6.07026	0.279488	0.733487	11.3657	38385.9	1843.98	1936.17	1.05	1595.92	1369.09	0.857871	2.28601	0.610233	0.658459	0.571407	0.582831	0.871272	0.93108	1.08422	1.03074	1.01887	3673.93	23.5373	1896.06	42.4337
1801714	3	2017-07-06	2015-06-24	743	1	48	2019-02-18	1969-01-11	50	-1	67.8	171	23.1866	24.6914	1.10953	28.3437	25.5457	0.992952	1.00184	5.70193	17.3908	7.6658	50852.6	16.6342	7.30134	0.314894	0.920783	9.59347	48640.1	2104.79	2212.51	1.05118	1845.97	1669.73	0.904523	2.09717	0.666757	0.727245	0.587444	0.59755	0.924939	1.10478	1.11673	1.06199	1.03617	3876.58	23.8489	2659.15	30.9684
1917951	3	2017-10-09	2015-11-03	706	1	43	2019-02-18	1974-03-15	45	-1	63.6	169.5	22.1369	20.9375	0.948083	24.2309	25.5577	0.960946	0.972301	4.59974	17.3692	7.94633	49902.2	16.5689	7.52325	0.339851	0.976399	7.74976	47602.8	2072.54	2299.32	1.10942	1826.86	1741.78	0.953426	2.26939	0.748796	0.765345	0.595393	0.564453	0.781096	0.915792	1.18286	1.15696	1.14468	3682.9	23.5685	3019.01	22.6239
1926510	3	2017-08-30	2015-10-15	685	1	47	2019-02-18	1970-01-20	49	-1	69.2	175.5	22.4674	26.5216	1.0729	30.6025	28.5233	1.00482	1.10173	5.94094	16.4595	7.32379	50695.5	15.7449	6.95333	0.309486	0.953224	11.9808	48494.6	2084.09	2200.95	1.05607	1834.03	1590.32	0.867117	2.44195	0.714217	0.757723	0.536323	0.558448	0.707855	0.792251	1.04766	1.07089	1.03908	4020.03	23.5796	3208.28	26.5268
1975332	3	2017-09-04	2015-10-20	685	1	46	2019-02-18	1971-05-10	48	-1	75.9	170	26.263	17.6705	1.08172	20.1477	18.6256	1.02272	1.11708	4.63498	21.595	9.60785	62409.6	20.5383	9.02058	0.343471	0.992632	5.53373	59355.7	2340.12	3053.93	1.30503	2095.63	2537.52	1.21086	2.11227	0.939168	0.985045	0.652091	0.63748	1.06525	1.22899	1.51178	1.46428	1.44249	3713.74	23.7483	3831.82	19.2898
1978164	3	2018-10-10	2016-09-21	749	1	56	2019-02-18	1962-09-29	56	0	72.2	159	28.559	28.1332	1.48706	37.3701	25.1302	1.42999	1.58451	8.01038	20.4626	8.96967	51731.6	19.771	8.57484	0.30025	0.759062	9.32873	49983.2	1814.95	1748.42	0.963344	1586.99	1394.13	0.878472	1.55421	0.740275	0.787666	0.48881	0.509673	0.75388	0.80128	1.09301	1.06872	1.11962	4068.41	25.411	3177.3	29.8609
2010647	3	2018-06-21	2015-06-04	1113	1	83	2019-02-18	1934-12-03	84	-1	75.2	164	27.9595	32.4726	1.28789	37.7945	29.3459	1.17239	1.63058	9.0459	18.8112	7.08148	50594.5	18.0746	6.71504	0.24017	0.645961	13.8228	48613.5	1936.23	1980.95	1.0231	1689.71	1395.55	0.825913	2.37463	0.725943	0.737436	0.523659	0.565162	0.640918	0.916336	0.981393	0.989257	1.04215	4831.37	25.0703	2847.35	36.139
2068274	3	2017-07-12	2015-07-07	736	1	59	2019-02-18	1958-05-15	61	-1	70.9	169	24.8241	24.5488	1.13677	28.6975	25.2449	1.0273	1.14307	6.06148	18.6301	8.09413	53209.5	17.8905	7.6973	0.310074	0.885603	9.15858	51097	2105.59	2112.5	1.00328	1862.7	1607.73	0.863121	2.07815	0.73331	0.697598	0.507984	0.517868	0.70667	0.824149	1.07873	1.05755	1.03709	3992.91	24.226	3289.31	26.45
2146090	3	2017-09-12	2015-07-22	783	1	47	2019-02-18	1970-05-24	49	-1	72	168.5	25.359	26.5342	1.08967	30.581	28.0644	1.00736	1.05052	6.72972	18.6328	8.02914	52902.6	17.8389	7.58812	0.299228	0.849575	9.67775	50648.5	2100.01	2254.05	1.07335	1856.33	1788.79	0.963616	1.90928	0.721633	0.777746	0.54293	0.522657	0.860896	1.01803	1.14105	1.17687	1.22538	3901.85	24.4429	3027.83	32.4458
2168166	3	2018-09-14	2016-09-05	739	1	47	2019-02-18	1970-11-03	48	-1	73.4	172	24.8107	24.3378	1.09488	28.2801	25.8295	1.05726	1.19558	6.02157	18.7201	8.11656	55381.4	17.9474	7.67514	0.309348	0.915174	9.55496	53095.6	2142.46	2285.85	1.06693	1898.31	1891.28	0.9963	1.61609	0.819897	0.843214	0.555173	0.590113	0.834693	0.974941	1.20258	1.26893	1.18154	4205.61	24.6104	3655.42	24.7967
2187898	3	2017-08-09	2015-09-09	700	1	51	2019-02-18	1966-07-08	53	-1	72	169.5	25.0607	25.5157	1.32864	33.2264	25.0078	1.1568	1.32519	6.42802	18.7644	8.25144	53910.6	18.0942	7.89468	0.315022	0.905067	9.88934	51985.2	2002.86	1925.44	0.961349	1760.76	1474.7	0.837535	1.86185	0.724952	0.743029	0.486277	0.507045	0.700629	0.780442	1.03889	1.02381	0.992216	3929.4	24.3565	3292.58	25.6495
2238353	3	2017-04-05	2015-07-20	625	1	57	2019-02-18	1959-11-16	59	-1	58.6	171	20.0404	19.2064	0.970396	20.1665	20.7817	1.02419	1.18778	3.8246	16.0885	6.88837	47044.5	15.4202	6.55804	0.327242	0.956887	8.51654	45090.1	1833.63	1954.45	1.06589	1558.49	1359.17	0.87211	2.16351	0.761933	0.776948	0.607926	0.598776	0.699588	0.74414	0.929737	1.08934	1.0403	4075.07	23.5674	2891.59	18.4085
2263535	3	2017-06-02	2015-11-12	568	1	48	2019-02-18	1968-09-20	50	-1	66.7	176.5	21.411	19.4869	0.840917	18.728	22.2709	0.895229	0.898953	4.22425	17.4531	7.88288	54370.4	16.5583	7.43517	0.34726	1.08179	7.54183	51582.8	2325.78	2787.54	1.19854	2035.91	2146.04	1.0541	2.213	0.806453	0.858596	0.580352	0.586879	0.926032	1.24682	1.4293	1.20405	1.22272	4252.92	23.5064	3325.14	22.4319
2292589	3	2017-03-03	2015-04-03	700	1	52	2019-02-18	1964-05-12	55	-1	80.4	174.5	26.4037	21.5535	1.31288	28.8267	21.9569	1.42005	1.62665	5.75758	20.9554	9.218	63809.7	19.9852	8.71918	0.330225	1.00554	8.43363	60855.5	2357.64	2954.18	1.25302	2102.01	2414.11	1.14848	2.11268	0.889621	0.89173	0.771805	0.800569	1.0666	1.20358	1.67602	1.28907	1.2495	4261.3	24.0382	3670.86	21.468
2459803	3	2018-10-11	2016-10-17	724	1	49	2019-02-18	1968-11-26	50	-1	73.2	169.5	25.4784	20.1157	1.16172	25.074	21.5835	1.16842	1.19271	5.04786	20.0462	9.37131	57593.3	19.1581	8.89451	0.3491	1.00297	6.84304	55041.7	2176.43	2551.66	1.17241	1952.03	2148.85	1.10083	1.79508	0.821846	0.880726	0.689744	0.651925	1.00219	1.34295	1.5757	1.15582	1.29158	3762.47	24.277	3560.59	20.5969
2466747	3	2018-07-06	2016-05-20	777	1	44	2019-02-18	1974-07-05	45	-1	79.4	179	24.7807	22.5262	1.13884	27.0666	23.7669	1.05842	1.16891	5.59785	19.2526	8.65288	61687.2	18.4443	8.21365	0.331453	1.06201	8.97939	59097.5	2302.46	2589.7	1.12475	2048.43	2065.3	1.00823	2.06434	0.779978	0.865989	0.580111	0.610518	0.841411	1.02255	1.29921	1.17462	1.20774	3759.91	23.874	3421.1	24.631
2483452	3	2017-11-16	2015-11-13	734	2	60	2019-02-18	1959-06-14	60	52	80	162	30.4832	34.1683	1.03766	33.2337	32.0275	1.12283	1.57727	10.4232	20.0823	7.02234	52704	19.1897	6.61486	0.217	0.569496	13.6467	50361.4	1963.04	2342.62	1.19336	1730.1	1829.61	1.05752	2.20234	0.743237	0.725637	0.721136	0.694211	1.12326	1.33038	1.52973	1.19925	1.23233	3721.81	24.0547	2277.14	49.1209
2583707	3	2017-09-15	2015-10-30	686	1	42	2019-02-18	1974-11-03	44	-1	51.8	169	18.1366	18.2949	0.882792	20.3718	23.0766	0.854602	0.857427	3.28702	14.6798	6.7606	41927.1	13.9309	6.37437	0.351464	1.00382	7.49524	39787.9	1976.18	2139.15	1.08247	1738.86	1579.64	0.908433	2.35767	0.774287	0.768483	0.530677	0.561359	0.727525	0.964657	1.05438	1.08506	1.11527	3468.07	23.3142	2696.43	16.8488
2723510	3	2018-07-20	2017-07-18	367	1	54	2019-02-18	1964-03-24	55	0	77.2	173	25.7944	26.325	1.40633	31.9309	22.7052	1.34644	1.48683	6.78664	18.9935	8.54188	56845.7	18.1849	8.09223	0.313721	0.938935	10.8773	54425.6	2123.49	2420.16	1.13971	1898.7	1930.71	1.01686	2.17733	0.824277	0.811907	0.561797	0.56175	0.811672	1.02795	1.15477	1.33511	1.2868	3928.03	24.1532	3113.64	27.851
2763358	3	2018-11-07	2015-10-14	1120	1	54	2019-02-18	1964-02-25	55	-1	82.5	178	26.0384	22.2217	1.2507	28.6085	22.874	1.09654	1.2066	5.83679	20.4294	9.00781	64728.6	19.5732	8.52341	0.32734	1.03714	8.44379	62015.8	2313.92	2712.81	1.17239	2067.79	2181.56	1.05502	2.15844	0.845109	0.872776	0.656865	0.647734	0.928906	1.00909	1.28813	1.2819	1.24339	4391.64	24.2082	4305.06	24.3648
2903701	3	2017-09-26	2015-10-13	714	1	57	2019-02-18	1959-12-07	59	-1	79.9	169.5	27.8104	26.1147	1.0779	29.48	27.3494	1.01532	1.28761	6.36603	18.0112	7.41426	51746.6	17.4079	7.10835	0.2556	0.734346	10.7122	50013.4	1875.44	1733.21	0.924163	1642.5	1309.46	0.797235	1.81917	0.659966	0.682143	0.524673	0.483003	0.703199	0.77059	0.98096	0.934556	0.986346	3802.52	24.2943	2691.85	25.4882
2906892	3	2017-05-05	2015-10-14	569	1	60	2019-02-18	1956-11-23	62	-1	69.3	165	25.4545	22.0666	0.979353	23.4502	23.9446	1.04255	1.15533	5.65745	19.9806	8.60156	54397.2	19.2855	8.23856	0.323658	0.881159	7.22453	52504.9	1887.78	1892.26	1.00237	1658.03	1441.21	0.869227	1.96323	0.745211	0.777078	0.521077	0.53299	0.851288	0.820683	0.98334	1.02861	1.04814	3846.26	24.3786	3584.24	23.9582
2938393	3	2017-06-15	2015-05-21	756	1	54	2019-02-18	1962-10-20	56	-1	64.8	164.5	23.9466	21.6723	1.29747	26.7029	20.5807	1.05582	1.19514	5.22137	18.871	7.99637	51065.3	18.1205	7.62863	0.318569	0.862055	7.6541	49034.5	1885.39	2030.81	1.07713	1640.91	1509.1	0.91967	2.13393	0.707547	0.75714	0.556418	0.594514	0.824251	0.984454	1.23003	1.06977	1.06727	3870.79	23.8705	2764.71	27.4464
2989731	3	2018-07-10	2015-07-20	1086	1	56	2019-02-18	1962-04-07	57	-1	57.6	166	20.9029	20.568	1.20297	26.3325	21.8895	1.10089	1.33403	4.31722	16.6728	6.9648	45943.5	15.9195	6.5786	0.314722	0.867248	8.80123	43867.9	1884.08	2075.64	1.10167	1660.87	1575.42	0.948553	2.24098	0.794952	0.775432	0.587103	0.568854	0.76952	0.979069	1.18186	1.16692	1.11376	3611.21	23.7822	2468.16	20.5594
3036598	3	2017-11-21	2015-11-02	750	2	46	2019-02-18	1971-04-17	48	-1	54.7	160	21.3672	34.2879	0.794896	30.5842	38.4757	0.79828	0.838191	7.23905	13.8735	5.54031	35516.1	12.9907	5.16141	0.241558	0.618388	15.4182	33256.3	1844.78	2259.87	1.22501	1611.05	1509.16	0.93676	3.21179	0.693024	0.724714	0.646381	0.596994	0.857889	1.04904	1.20268	1.13929	1.09637	3689.66	22.6185	1544.11	47.0022
3077673	3	2017-07-26	2015-06-02	785	1	49	2019-02-18	1967-12-17	51	-1	60	173.5	19.9321	22.1871	0.913918	22.2602	24.3569	0.955044	1.08251	4.43004	15.5367	6.60097	46769	14.7704	6.2381	0.312968	0.942105	10.4422	44462.2	2057.01	2306.83	1.12145	1790.63	1589.93	0.887919	2.69124	0.694102	0.7563	0.576861	0.590637	0.821037	0.934331	0.929992	1.06802	1.11149	4156.22	23.1704	2415.77	24.516
3130723	3	2018-06-22	2015-06-09	1109	1	82	2019-02-18	1936-03-14	83	-1	56.3	164.5	20.8054	18.6339	0.720869	16.046	22.2593	0.715864	0.943244	3.77906	16.5015	6.01529	44653.5	15.7613	5.67867	0.272942	0.738587	7.23316	42650.5	1828.77	2002.93	1.09523	1599.63	1405.18	0.878437	2.60866	0.717199	0.710601	0.601564	0.580447	0.89448	0.983647	0.963037	1.05484	1.02234	3722.11	23.3993	2380.16	23.4171
3179655	3	2017-05-17	2015-05-25	723	1	45	2019-02-18	1971-07-02	48	-1	67	170.5	23.0476	20.625	1.04338	24.7931	23.7623	1.17021	1.16963	4.79672	18.4601	8.54042	53664.1	17.4117	7.9987	0.347051	1.00889	7.92095	50616.1	2253.71	3048	1.35244	1961.45	2268.25	1.15642	2.66794	0.927371	0.959861	0.722367	0.716782	0.984114	1.0524	1.38602	1.40954	1.39424	4430.49	23.0519	3064.96	21.0544
3268371	3	2017-08-10	2015-06-01	801	1	38	2019-02-18	1979-07-10	40	-1	64.6	164.5	23.8727	21.5159	1.11412	24.5355	22.0223	1.05325	1.18107	5.15811	18.8154	8.25308	50914.9	17.9378	7.7899	0.326311	0.883005	7.59084	48540.1	2027.15	2374.79	1.17149	1777.88	1843.57	1.03695	2.13116	0.808646	0.838882	0.634259	0.629901	0.862549	1.05222	1.24142	1.26671	1.29584	3927.33	23.8047	2965.24	21.6961
3327966	3	2017-07-14	2015-07-09	736	1	40	2019-02-18	1976-09-27	42	-1	71	162	27.0538	24.283	1.19729	30.2136	25.235	1.21897	1.32814	6.63011	20.6735	9.10356	54255.4	19.8821	8.6949	0.321393	0.843463	7.77737	52178.5	1934.77	2076.91	1.07347	1711.79	1614.19	0.942986	2.07513	0.727335	0.772471	0.526301	0.522001	0.852731	0.912399	1.2937	1.10684	1.14342	3774.25	24.4445	3231.79	27.6337
3404927	3	2017-08-11	2015-07-30	743	1	53	2019-02-18	1963-10-30	55	0	60.1	158	24.0747	21.9227	1.22415	26.6142	21.741	1.20927	1.38504	5.26714	18.7588	7.88933	46829.6	18.0209	7.51161	0.312013	0.778909	7.60878	44987.3	1822.08	1842.27	1.01108	1588.35	1396.79	0.879398	1.90594	0.74636	0.744506	0.510862	0.538462	0.863893	0.888717	1.05959	1.04	1.04874	3777.14	24.2023	2786.72	24.0098
3406540	3	2018-05-18	2016-08-24	632	1	50	2019-02-18	1968-02-08	51	-1	66.8	168.5	23.5275	21.6578	1.01959	25.9973	25.4977	0.901648	0.894996	5.15972	18.6641	8.67808	52991.7	17.7495	8.20507	0.348743	0.99016	7.12651	50394.8	2175.64	2596.92	1.19363	1925.17	1996.54	1.03707	2.39697	0.883617	0.876823	0.637367	0.68575	0.849016	1.21305	1.24731	1.21435	1.19088	3755.13	23.3146	3730.92	22.2565
3577650	3	2016-09-24	2014-09-19	736	1	8	2019-02-18	2008-09-08	10	-1	20.5	128	12.5122	16.7703	1.09866	19.2037	17.4793	0.933751	0.840379	2.13853	10.6134	4.48367	17389	10.0911	4.28089	0.342137	0.560557	5.41473	16533.2	1168.67	855.787	0.732277	951.258	520.941	0.547633	1.54018	0.43619	0.420385	0.410181	0.417043	0.505304	0.604724	0.600406	0.645051	0.621493	2485.61	23.8019	780.266	19.8069
3594039	3	2018-05-03	2016-09-09	601	1	43	2019-02-18	1974-05-30	45	-1	79.4	180.5	24.3706	19.5075	1.02037	21.4703	21.0417	0.988095	0.952574	4.77522	19.7037	9.2188	64195	18.6372	8.69002	0.356578	1.16174	7.10341	60720.4	2443.5	3474.65	1.422	2170.9	2682.5	1.23566	2.90591	0.924281	0.949833	0.7419	0.717827	1.16397	1.31829	1.68458	1.38328	1.41745	4459.14	22.9296	4271.03	21.7032
3653157	3	2018-06-20	2016-06-27	723	1	71	2019-02-18	1947-11-20	71	-1	75.3	173	25.1595	21.5019	0.961487	22.5055	23.4069	0.973688	1.0538	5.45097	19.9002	8.94249	59559.2	19.0487	8.49559	0.337669	1.01061	7.47775	57010.9	2323.79	2548.32	1.09662	2054.36	1983.3	0.965413	2.09704	0.758383	0.767187	0.615973	0.634369	0.931506	1.01341	1.21754	1.12453	1.13068	4284.75	23.8464	3416.32	21.7028
3728389	3	2017-06-13	2015-09-28	624	1	44	2019-02-18	1973-04-15	46	-1	73.8	178.5	23.1622	26.7044	1.30656	32.1536	24.6094	1.21061	1.32115	6.20458	17.0297	7.62263	54260.5	16.2655	7.20402	0.311025	0.990994	12.7633	51825.6	2177.26	2434.95	1.11836	1920.83	1902.59	0.990501	2.07608	0.806628	0.852654	0.584894	0.504692	0.811704	0.97264	1.23125	1.2055	1.17896	3998.35	23.9312	2887.61	27.809
3744056	3	2018-09-07	2016-07-28	771	1	58	2019-02-18	1960-09-03	58	0	71.3	170.5	24.5268	21.9017	0.960112	24.4777	25.4946	0.984121	1.03366	5.36719	19.1386	8.6112	55636.3	18.3337	8.16182	0.332772	0.967376	7.66669	53296.6	2221.08	2339.65	1.05338	1971	1924.96	0.976642	1.65822	0.783783	0.813549	0.646105	0.658643	0.864869	0.821136	1.25135	1.11102	1.16014	4223.72	24.4466	3346.86	23.1155
3747874	3	2017-05-18	2015-05-12	737	1	40	2019-02-18	1976-06-19	43	-1	67.4	157.5	27.1706	29.1807	1.27568	36.3893	28.5254	1.25793	1.63679	7.98068	19.3685	8.00698	48046	18.6203	7.64927	0.281528	0.698364	10.4093	46189.9	1846.77	1856.08	1.00504	1596.31	1361.38	0.852828	1.97518	0.75414	0.774904	0.517386	0.582733	0.768162	0.84314	1.06483	1.01627	1.02035	3774	24.2565	2538.03	28.9244
3792793	3	2017-12-02	2015-02-14	1022	1	9	2019-02-18	2008-10-04	10	-1	26.8	126	16.8808	18.5215	0.821818	18.1743	22.1147	0.885653	0.756024	3.07942	13.5468	6.1795	21506.8	12.9422	5.92671	0.351091	0.557393	4.34875	20547.1	1235.56	959.735	0.776761	995.854	624.485	0.627085	1.39859	0.506995	0.465089	0.47238	0.475709	0.528855	0.620582	0.76841	0.70505	0.733427	2842.27	24.1139	1120.77	20.5537
3871024	3	2017-07-28	2015-07-24	735	1	8	2019-02-18	2009-02-19	10	-1	22.8	123	15.0704	16.1562	0.777012	12.8744	16.5691	0.8588	0.830479	2.45916	12.762	5.48867	19307.6	12.2673	5.30738	0.352172	0.532802	3.84571	18559.2	1074.69	748.422	0.696404	844.545	451.454	0.534553	1.29033	0.436247	0.454614	0.436876	0.381749	0.520299	0.569922	0.622011	0.579514	0.602852	2703.38	24.2902	967.35	15.5081
4077029	3	2018-04-26	2016-07-26	639	1	59	2019-02-18	1958-09-05	60	0	69.5	166.5	25.0701	18.6472	1.11015	21.2004	19.0968	1.16599	1.26492	4.71735	20.5805	9.13623	57053.7	19.7238	8.71094	0.347463	0.963246	6.12152	54678.8	2136.53	2374.9	1.11157	1876.97	1829.34	0.974621	2.10187	0.757159	0.775735	0.60605	0.607515	0.912944	1.09622	1.28187	1.10201	1.11534	3999.28	23.8647	3265.75	18.6471
4150182	3	2017-06-23	2015-07-22	702	1	53	2019-02-18	1964-01-10	55	0	75.8	167.5	27.0172	24.9841	1.28327	31.5001	24.5467	1.18744	1.38834	6.76839	20.3223	8.4534	57016.9	19.5045	8.02737	0.297121	0.833611	9.13644	54722.2	2084.49	2294.7	1.10085	1835.62	1721.77	0.937976	2.30218	0.759466	0.767774	0.614028	0.522809	0.733873	0.94692	1.18853	1.13707	1.13034	4510.21	24.4642	2996.45	26.9795
4205850	3	2017-07-20	2015-06-04	777	1	72	2019-02-18	1944-10-18	74	-1	65.7	174	21.7004	24.5337	1.18446	31.3061	26.4307	1.17282	1.41795	5.31044	16.3351	6.95641	49456	15.6885	6.59892	0.304093	0.920671	12.0169	47498.6	1978.97	1957.4	0.989102	1734.08	1535.41	0.885432	1.72322	0.706868	0.758723	0.543219	0.601956	0.69603	0.874472	1.10606	1.04974	1.03144	3895.08	24.3309	2532.14	25.3276
4207738	3	2018-09-11	2016-08-18	754	1	55	2019-02-18	1963-05-19	56	0	63.2	160	24.6875	28.6503	1.01305	31.4221	31.0174	0.86812	0.8998	7.24106	18.0329	7.83909	46164.2	17.3552	7.46789	0.302497	0.774392	9.19681	44429.3	1824.03	1734.8	0.95108	1591.34	1330.96	0.836379	1.73549	0.695395	0.699179	0.495941	0.497461	0.783848	0.858229	0.970343	0.971285	1.02481	3702.91	24.5041	2768.07	33.1897
4236901	3	2017-05-23	2015-06-18	705	1	46	2019-02-18	1970-09-16	48	-1	72.3	172	24.4389	20.8081	1.32348	26.414	19.958	1.22812	1.29109	5.05339	19.2323	8.51744	56896.7	18.3814	8.06632	0.330061	0.976452	8.00669	54379.6	2170.89	2517.11	1.15948	1909.68	1994.71	1.04453	1.99991	0.786863	0.866203	0.709536	0.632986	0.854193	1.03001	1.35651	1.20296	1.23712	4274.15	24.1203	3025.53	21.9051
4255052	3	2017-10-13	2015-10-30	714	1	54	2019-02-18	1963-08-23	56	-1	76.4	166.5	27.5591	20.8542	1.38	28.4271	20.5993	1.20596	1.34666	5.75724	21.8498	9.47414	60572.6	20.7622	8.92606	0.323888	0.89789	6.79575	57557.4	2192.39	3015.22	1.37531	1937.95	2400.44	1.23864	2.41624	0.920514	0.950936	0.799829	0.815446	1.196	1.45067	1.73397	1.38775	1.38678	4521.71	23.921	4531.46	22.0734
4259814	3	2017-05-05	2015-06-02	703	1	58	2019-02-18	1958-12-11	60	-1	62.9	167.5	22.4192	22.976	1.0608	25.8509	24.3693	1.23028	1.39914	5.12013	17.1646	7.25264	48157.4	16.421	6.87417	0.306619	0.860259	9.88592	46071.2	2021.57	2086.14	1.03194	1772.31	1570.84	0.886323	2.06731	0.72787	0.729086	0.577567	0.662462	0.758467	0.899998	1.0755	1.07311	1.04739	3746.75	23.8982	2661.67	26.6823
4278298	3	2017-07-06	2015-07-10	727	1	48	2019-02-18	1968-12-08	50	-1	83	166	30.1205	26.941	1.35066	32.0239	23.7098	1.25469	1.4615	8.14313	22.0827	9.53409	60851.1	21.2544	9.09322	0.301895	0.831901	8.83033	58568.6	2081.7	2282.5	1.09646	1847.57	1833.54	0.992407	1.91756	0.776826	0.82197	0.615684	0.645045	0.889913	0.928326	1.21551	1.21693	1.2361	4101.51	24.5003	4015.58	28.8123
4306576	3	2017-06-08	2015-06-08	731	1	71	2019-02-18	1945-08-27	74	-1	70	169	24.5089	24.572	1.27989	31.1639	24.3488	0.986195	1.09645	6.1962	19.0203	8.15426	54323.8	18.1492	7.71809	0.314909	0.899411	9.02196	51836	2090.46	2487.85	1.1901	1824.07	1783.33	0.977664	2.64476	0.749348	0.753856	0.598753	0.616638	0.937304	1.01271	1.10271	1.22218	1.19305	4705.68	23.7613	3588.7	27.1073
4335091	3	2018-06-26	2016-07-25	701	1	54	2019-02-18	1964-02-28	55	0	56.1	167	20.1155	16.1514	1.03461	18.1752	17.5673	0.904172	1.07771	3.19668	16.5953	6.94361	46282.7	15.9387	6.59202	0.327709	0.913948	6.24591	44451.5	1890.8	1831.24	0.9685	1631.63	1382.93	0.847576	1.7298	0.749302	0.781035	0.539978	0.506567	0.669297	0.856496	0.930681	0.991805	1.02006	3674.72	23.8991	2457.05	16.0559
4425576	3	2017-05-31	2015-05-21	741	1	55	2019-02-18	1961-07-18	58	-1	89.8	177.5	28.5023	27.965	1.31098	34.6382	26.4216	1.3305	1.8471	7.90782	20.3698	8.33737	64177.5	19.5205	7.87521	0.276301	0.870521	12.4878	61501.6	2397.86	2675.89	1.11595	2144.61	2146.51	1.00089	2.09038	0.793241	0.804064	0.633733	0.601947	0.765819	1.10883	1.24421	1.25409	1.25465	4211.19	24.1923	3388.75	25.4892
4435113	3	2017-06-19	2015-06-16	734	1	58	2019-02-18	1956-05-14	63	-1	70	165.5	25.5565	25.3529	1.30802	32.7181	25.0134	1.30253	1.5736	6.51832	19.1921	7.93548	52567.6	18.3148	7.5305	0.29466	0.807082	10.0549	50164.8	2052.63	2402.74	1.17057	1775.89	1750.52	0.985712	2.35683	0.780863	0.861361	0.647221	0.641038	0.896223	1.03394	1.44617	1.08539	1.11358	4540.69	23.8936	2938.38	26.0356
4547463	3	2017-06-23	2015-10-30	602	1	57	2019-02-18	1960-01-15	59	-1	74.5	169.5	25.9309	20.768	1.239	26.0859	21.054	1.09285	1.181	5.43042	20.7175	9.23201	59522	19.7402	8.70906	0.335857	0.964926	6.96467	56714	2254.51	2807.99	1.2455	2016	2271.58	1.12677	2.24899	0.915496	0.923585	0.679756	0.730852	1.06607	1.18378	1.46098	1.31072	1.26173	3928.7	23.9128	4315.12	22.1562
4556134	3	2017-05-10	2015-08-05	644	1	54	2019-02-18	1962-11-05	56	0	68.5	170	23.7024	22.7042	1.33987	27.699	20.6729	1.19642	1.38077	5.38954	18.3485	8.07454	53027.2	17.5566	7.68386	0.32418	0.936882	9.19682	50738.5	2083.29	2288.75	1.09862	1830.05	1722.66	0.94132	2.23535	0.784725	0.779966	0.65183	0.646806	0.796837	0.988493	1.24274	1.06293	1.10171	4038.76	23.7705	3088.56	20.9228
4732313	3	2017-11-20	2015-11-02	749	2	44	2019-02-18	1972-12-06	46	-1	61	169.5	21.232	35.1073	0.957267	37.325	38.9912	0.852222	0.885597	7.44324	13.7581	5.84497	39527.5	13.1398	5.53511	0.260697	0.748988	17.1541	37750.9	1827.66	1776.55	0.972034	1587.55	1328.7	0.836951	1.8652	0.660102	0.683212	0.493437	0.489591	0.706225	0.962397	1.05356	0.998735	0.995117	3417.51	24.045	1873.54	39.3388
4734682	3	2018-04-19	2015-05-06	1079	1	43	2019-02-18	1975-02-21	44	-1	84.4	172	28.5289	22.4921	1.25592	26.2845	20.9285	1.08636	1.15477	6.47668	22.3186	9.91918	66027.5	21.4685	9.48799	0.332574	0.983888	7.12264	63512.3	2125.47	2515.13	1.18333	1870.26	1899.95	1.01588	2.41043	0.828576	0.86304	0.634822	0.612273	0.876005	1.09745	1.26527	1.19842	1.19517	4759.81	24.2647	4187.26	24.4749
4803746	3	2017-08-23	2015-06-29	786	1	51	2019-02-18	1965-09-28	53	-1	74.3	171	25.4095	26.5164	1.36693	34.9554	25.5723	1.20886	1.45148	6.79268	18.8242	7.90667	55043.9	18.0686	7.50974	0.295548	0.864212	11.026	52834.4	2090.86	2209.49	1.05674	1838.41	1730.02	0.941042	1.89927	0.726875	0.7795	0.595322	0.60597	0.892539	0.978632	1.18518	1.1325	1.11374	4163.12	24.3574	2866	29.8241
4849501	3	2018-05-25	2016-05-11	744	1	51	2019-02-18	1967-01-19	52	0	63.9	163.5	23.9037	21.7275	1.18836	26.0469	21.9183	1.15397	1.36203	5.21066	18.7712	8.03246	50179.7	17.9275	7.60788	0.318272	0.850813	8.03136	47924.3	1990.36	2255.42	1.13317	1749.76	1681.08	0.96075	2.38715	0.773977	0.78124	0.649122	0.64445	0.829668	0.928116	1.26954	1.1466	1.14941	4064.45	23.7662	2842.86	20.8916
4865909	3	2017-03-21	2015-04-16	705	1	56	2019-02-18	1960-12-07	58	-1	73	172	24.6755	20.1813	1.16658	25.2014	21.6028	1.09412	1.19716	4.82757	19.0934	8.49986	56485.9	18.2474	8.05302	0.326357	0.965494	7.5889	53983.3	2264.07	2502.62	1.10536	2002.06	1930.71	0.964359	2.18283	0.783017	0.84504	0.549939	0.598243	0.843828	0.965486	1.25741	1.12812	1.13547	4193.56	23.8056	3962.6	19.9567
4866648	3	2017-09-27	2015-09-25	733	1	49	2019-02-18	1968-04-13	51	-1	67.2	170	23.2526	23.8858	1.19339	27.4186	22.9753	1.18757	1.37888	5.59001	17.8131	7.62901	51479.8	17.1135	7.27895	0.313038	0.90468	10.0437	49458	2005.25	2021.78	1.00824	1766.74	1575.97	0.892026	1.86911	0.694532	0.752323	0.572303	0.521122	0.75322	0.881509	1.13697	1.06824	1.07733	3950.59	24.3076	2664.59	23.4614
4878418	3	2017-09-12	2015-12-03	649	1	48	2019-02-18	1969-09-04	49	-1	76.2	176	24.5997	24.4014	1.21776	30.442	24.9983	1.12297	1.21855	6.00481	18.6036	8.27934	57626.5	17.7529	7.83325	0.318429	0.986365	10.0748	54991.3	2296.72	2635.19	1.14737	2040.29	2039.79	0.999758	2.32185	0.781661	0.819209	0.6363	0.642227	0.90959	1.14399	1.278	1.16082	1.16541	4198.05	23.756	3187.39	26.3182
4898931	3	2018-06-05	2016-08-17	657	1	59	2019-02-18	1958-07-28	61	0	74.4	168.5	26.2043	28.3179	0.995587	28.6853	28.8124	0.914576	1.06525	7.45203	18.8635	7.91956	53557.8	18.0554	7.49674	0.286088	0.812267	10.4129	51263.3	2119.94	2294.56	1.08237	1873.81	1792.6	0.956659	2.03945	0.823057	0.837553	0.568273	0.604256	0.894534	0.988112	1.15882	1.12556	1.07861	4056.18	24.2163	3363.76	30.8436
4937992	3	2017-04-13	2015-05-15	699	1	54	2019-02-18	1963-03-01	56	0	82.1	183.5	24.3821	20.5934	1.2225	26.2886	21.5039	1.09988	1.11777	5.02296	19.3681	8.75552	65216.7	18.6389	8.34652	0.342322	1.15267	8.36079	62761.4	2284.77	2455.3	1.07464	2005.25	1932.89	0.963914	1.86893	0.746808	0.743637	0.621853	0.51862	0.76573	0.889294	1.23615	1.18277	1.16525	4484.41	24.2433	3911.66	23.061
4945373	3	2017-09-21	2016-09-14	372	1	46	2019-02-18	1971-05-09	48	-1	83.8	182.5	25.1604	24.8333	1.34794	31.3115	23.2291	1.26166	1.26885	6.15223	18.6219	8.67054	62022.6	17.9335	8.30067	0.329909	1.0988	10.8735	59729.9	2344.1	2292.72	0.978081	2070.15	1796.42	0.867774	1.81163	0.687096	0.716067	0.539861	0.559584	0.727403	0.932365	1.13244	1.03721	1.04543	4511.17	24.4339	3971.89	25.6484
5074353	3	2017-08-09	2015-10-22	657	1	53	2019-02-18	1964-05-10	55	-1	78.5	165.5	28.6598	26.1433	1.17185	31.2247	26.6456	1.15712	1.25178	7.53561	21.2886	9.28153	58310	20.406	8.81816	0.307684	0.842753	8.4505	55892.5	2113.95	2417.49	1.14359	1879.42	1902.93	1.01251	2.19401	0.788204	0.822197	0.655279	0.641748	0.967395	0.980397	1.43899	1.20152	1.13302	4193.19	24.3373	3595.36	30.7897
5166040	3	2017-11-13	2015-11-02	742	2	47	2019-02-18	1970-06-18	49	-1	57	154	24.0344	39.2948	1.00616	41.6744	41.4194	0.962065	0.973134	9.49063	14.6618	6.38646	34771.8	13.8881	6.03183	0.250967	0.595192	15.4645	32937	1720.15	1834.81	1.06666	1494.78	1316.36	0.880641	2.30041	0.629497	0.65325	0.524206	0.600713	0.867256	1.10568	1.21647	0.995334	1.03674	3264.92	23.4744	1574.46	48.1271
5214581	3	2017-05-02	2015-05-19	714	1	52	2019-02-18	1964-07-18	55	-1	56.6	166.5	20.4168	20.9652	0.94703	21.1436	22.3262	0.999932	1.11692	4.30952	16.246	7.12539	45037.7	15.5959	6.74633	0.33043	0.916027	8.53766	43235.4	1841.59	1802.3	0.978666	1605.07	1404.09	0.874783	1.68363	0.750057	0.763773	0.469855	0.492577	0.612794	0.687429	0.890696	1.15529	1.18033	3497.87	24.2163	2632.98	22.0817
5224275	3	2017-06-05	2015-11-06	577	1	54	2019-02-18	1963-04-20	56	-1	87.6	168.5	30.8535	32.4197	1.05989	33.401	31.5136	1.25476	1.47704	10.0568	20.9639	8.93926	59521.1	20.1356	8.4897	0.275162	0.781246	11.7269	57169.4	2225.44	2351.77	1.05676	1990.12	1911.12	0.960305	1.8725	0.740563	0.786234	0.617143	0.560953	0.873318	0.965291	1.27639	1.17424	1.17866	4169.29	25.2894	3641.72	35.5445
5238003	3	2017-08-25	2015-08-04	752	1	41	2019-02-18	1976-05-26	43	-1	72	170	24.9135	22.2788	1.09265	27.1705	24.8666	1.12746	1.12762	5.59587	19.5216	9.11496	56417.4	18.6352	8.63412	0.346564	1.00157	7.77126	53855.9	2149.39	2561.49	1.19173	1919.24	2066.17	1.07656	2.15216	0.815517	0.855445	0.687157	0.691554	0.981903	1.05344	1.29793	1.27731	1.27555	3886.46	24.0488	3007.79	23.6927
5242533	3	2018-05-21	2017-05-27	359	1	59	2019-02-18	1958-07-01	61	-1	60	172	20.2812	26.0008	1.085	30.0104	27.6595	1.04895	1.13192	5.31745	15.1337	6.87386	44771.4	14.4637	6.51419	0.321193	0.950218	12.1882	42789.4	1991.54	1982.01	0.995212	1777.02	1590.81	0.895211	1.82359	0.71035	0.7382	0.528107	0.601541	0.714025	0.976442	1.15633	1.03205	1.09619	3075.37	24.0433	2594.16	26.3493
5242896	3	2018-10-29	2016-10-11	748	1	48	2019-02-18	1970-10-10	48	-1	68.2	174.5	22.3972	22.563	1.16334	27.4714	23.6142	1.1014	1.14688	5.1397	17.6396	8.01762	53713.1	16.8496	7.55587	0.337358	1.02726	9.3298	51307.4	2146.01	2405.73	1.12102	1920.03	2028.15	1.05631	1.67086	0.889422	0.866025	0.572975	0.603251	0.815088	1.20289	1.43218	1.20206	1.31127	3628.8	24.4515	3854.74	22.9017
5243483	3	2018-05-31	2016-07-19	681	1	52	2019-02-18	1965-06-05	54	-1	71.3	170.5	24.5268	24.3567	1.22771	29.6131	24.1207	1.06256	1.18663	6.52209	20.2553	9.04456	58882.8	19.523	8.6717	0.35356	1.02781	8.47941	56753.9	2160.63	2128.94	0.985334	1883.29	1573.84	0.835683	2.00155	0.706663	0.689035	0.587818	0.491933	0.725392	0.833924	0.981009	1.00599	1.02829	4495.37	24.1476	3495.75	22.6652
5243667	3	2018-05-17	2016-05-05	742	1	50	2019-02-18	1968-10-26	50	-1	79.4	175	25.9265	23.7566	1.18562	29.2739	24.6908	1.04641	1.23292	6.1521	19.7443	8.60318	60466.9	18.9833	8.18603	0.315739	0.966952	9.11821	58136.2	2206.46	2330.64	1.05628	1950.06	1883.17	0.965698	1.7452	0.845519	0.835193	0.699414	0.661595	0.785775	0.88169	1.26073	1.09638	1.10417	4059.16	24.1928	3527.13	22.3399
5244187	3	2018-07-04	2016-09-22	650	1	47	2019-02-18	1970-12-08	48	-1	75.7	171	25.8883	23.7189	1.13122	30.4497	26.9177	0.859362	0.943699	6.18349	19.8864	8.68225	58149.7	19.0627	8.24295	0.318404	0.931046	7.9082	55741.1	2154.31	2408.58	1.11803	1868.28	1816.23	0.97214	2.07095	0.79261	0.826448	0.641439	0.581472	0.870503	0.929763	1.16464	1.12295	1.22879	4634.41	23.9687	3944.55	24.5606
5245476	3	2018-05-04	2016-07-13	660	1	55	2019-02-18	1962-12-12	56	-1	76.7	176	24.7611	24.5276	1.15811	28.1332	24.2924	1.08897	1.1858	6.06091	18.6497	8.46137	57769.3	17.9479	8.0906	0.326746	1.01213	9.83409	55595.3	2114.01	2173.98	1.02837	1866.7	1662.67	0.890702	2.06746	0.694522	0.755697	0.504248	0.523673	0.672376	0.790054	1.18054	1.14562	1.06596	4190.23	24.1906	3599.17	24.8142
5246064	3	2018-06-28	2016-05-19	770	1	54	2019-02-18	1964-06-25	55	-1	84.4	175	27.5592	27.9438	1.32721	34.7871	26.2108	1.08152	1.38125	7.74272	19.9655	8.24664	61144.3	19.2441	7.87204	0.285641	0.874777	11.3193	58935	2159.84	2209.28	1.02289	1903.05	1714.17	0.900749	1.92807	0.745704	0.766369	0.567694	0.581094	0.789517	0.794309	1.1387	1.07634	1.09626	4343.44	24.3164	3404.29	28.1818
5246078	3	2018-09-14	2016-09-19	725	1	59	2019-02-18	1959-02-09	60	-1	69.1	172.5	23.222	25.4466	1.03046	28.2476	27.4126	0.9095	0.99051	5.95086	17.4348	7.65363	51879.5	16.6429	7.21299	0.31061	0.924259	10.189	49523.1	2171.3	2356.41	1.08525	1905.02	1833.4	0.962406	1.96414	0.781165	0.813283	0.564855	0.572991	0.875955	0.97289	1.12239	1.20631	1.14488	4375.06	24.3359	3311.08	26.1529
5247417	3	2017-05-03	2015-08-13	629	1	54	2019-02-18	1963-03-10	56	0	73.5	169	25.7344	19.055	1.05337	20.6545	19.608	1.20884	1.6598	4.87435	20.706	8.20097	59138.4	19.872	7.79762	0.303004	0.865409	7.30684	56756.5	2095.63	2381.92	1.13661	1844.78	1849.44	1.00253	2.12269	0.841476	0.836721	0.72994	0.682098	0.930898	1.03211	1.28928	1.17214	1.14832	4057.27	23.9698	3450.19	18.9682
5250422	3	2018-05-28	2017-06-19	343	1	59	2019-02-18	1958-06-09	61	-1	65.9	163.5	24.6519	27.7035	1.10289	32.3056	29.2917	1.00675	1.26661	6.77547	17.6816	7.16597	47266.9	16.9385	6.81043	0.276264	0.738517	11.0546	45280.3	1878.55	1986.6	1.05752	1609.11	1401.97	0.871269	2.16982	0.717428	0.73295	0.615934	0.550525	0.809498	0.869848	1.11548	1.01644	1.00108	4144.42	23.8543	2427.91	28.2061
5251176	3	2017-07-05	2015-07-06	730	1	52	2019-02-18	1965-01-25	54	-1	76.2	166	27.6528	21.7881	1.34305	28.9412	21.5489	1.15381	1.31401	6.06899	21.7857	9.29435	60032.5	20.7939	8.78435	0.317666	0.87536	7.06942	57299.6	2180.05	2732.9	1.25359	1919.64	2119.27	1.10399	2.3564	0.871596	0.926562	0.591625	0.601829	1.02771	1.0849	1.55901	1.25491	1.28907	4595.93	23.903	3666.98	23.713
5251415	3	2017-06-05	2015-06-08	728	1	51	2019-02-18	1966-09-28	52	-1	69.8	161.5	26.7615	22.9919	1.07542	27.3765	25.4566	0.905151	0.914532	6.18623	20.7199	9.26486	54042.2	19.7938	8.80974	0.329195	0.858613	6.39633	51626.8	1945.92	2415.44	1.24128	1707.01	1782	1.04393	2.65135	0.751275	0.856506	0.629401	0.631436	0.967661	1.07389	1.3528	1.23447	1.19298	4071.34	23.4445	2837.56	27.4532
5252304	3	2018-07-26	2016-04-26	821	1	38	2019-02-18	1979-12-11	39	-1	70.3	174.5	23.0868	18.9616	1.07723	22.1829	20.5925	1.12644	1.23969	4.39751	18.7941	8.38018	57228.6	17.9667	7.9621	0.344876	1.05016	7.47153	54709	2197.37	2519.59	1.14664	1938.6	1989.66	1.02634	2.0479	0.749	0.769416	0.655694	0.631692	0.848974	1.14355	1.39862	1.18869	1.2384	4130.43	23.8311	2886.31	18.3844
5253665	3	2018-06-05	2016-05-18	748	1	57	2019-02-18	1961-10-09	57	-1	62.5	168	22.1443	18.4342	1.22865	23.5087	19.1338	1.00469	1.07743	4.11452	18.2055	8.16412	51383.1	17.5186	7.80255	0.352351	0.994474	6.51837	49444.6	1957.57	1938.56	0.990292	1709.86	1505.52	0.880497	1.74817	0.720856	0.729027	0.583522	0.61168	0.899771	0.875451	1.06242	1.00375	1.02671	3808.59	24.1929	3515.12	18.3399
5253942	3	2018-04-16	2016-07-04	651	1	47	2019-02-18	1970-11-20	48	-1	69.5	174	22.9555	18.4323	0.916412	19.8265	21.635	0.970439	0.972184	4.26527	18.8749	8.7586	57145.6	17.94	8.26668	0.360118	1.09029	6.53258	54315	2232.53	2830.56	1.26787	1966.65	2181.85	1.10942	2.43984	0.862259	0.860591	0.663982	0.7411	1.17687	1.13844	1.28356	1.30477	1.29352	4146.12	23.1805	3795.92	18.3334
5253956	3	2017-07-10	2015-10-08	641	1	42	2019-02-18	1975-03-07	44	-1	88	180	27.1605	24.7253	1.25603	30.8266	24.543	1.08223	1.06705	6.74859	20.5457	9.46734	66568.1	19.6716	9.02761	0.33238	1.07691	9.11869	63735.8	2391.48	2832.26	1.18431	2093.25	2089.08	0.99801	2.49191	0.842914	0.860012	0.575758	0.552729	0.84406	1.16906	1.27872	1.16884	1.12323	5269.95	23.942	4503.08	27.0408
5253966	3	2018-07-04	2016-07-01	733	1	44	2019-02-18	1973-08-13	46	-1	69.5	174	22.9555	21.9862	1.15327	25.1504	21.8079	1.00448	0.981119	5.07617	18.0118	8.35638	54532.6	17.0698	7.89365	0.343868	1.04109	8.38107	51680.4	2197.77	2852.12	1.29773	1932.68	2136.43	1.10543	2.69977	0.85374	0.87795	0.658925	0.547395	1.01944	1.19597	1.69753	1.20687	1.24035	4347.24	23.2656	3297.11	21.3621
5254151	3	2017-08-01	2015-08-13	719	1	53	2019-02-18	1964-05-05	55	0	73	171.5	24.8196	28.6481	1.24394	36.2955	29.1778	1.02456	1.21947	7.13126	17.7613	7.40597	52240	17.0418	7.01202	0.282519	0.830953	12.1996	50123.7	2145.81	2116.32	0.98626	1875.84	1650.76	0.88001	1.72452	0.680249	0.706488	0.523565	0.488675	0.786339	0.86028	1.07112	1.11602	1.04912	4146.59	24.3561	2731.29	31.2419
5254316	3	2018-04-13	2015-04-09	1100	1	46	2019-02-18	1972-11-02	46	-1	80	175	26.1224	25.217	1.36697	30.3452	22.1989	1.26418	1.32116	6.75092	20.0204	9.04637	61312.6	19.1888	8.60063	0.329243	1.00831	9.70152	58765.8	2196.58	2546.76	1.15942	1950.45	2041.53	1.04669	2.05272	0.803496	0.816228	0.638087	0.675252	0.905185	0.960857	1.33659	1.28307	1.23456	4293.13	24.4237	3146.36	28.4428
5255085	3	2018-05-10	2015-05-25	1081	1	52	2019-02-18	1966-08-21	53	-1	74.3	165.5	27.1264	25.0578	1.16167	28.5733	24.5967	1.03845	1.11205	6.88071	20.5787	9.1293	56365.5	19.8497	8.73952	0.322177	0.882452	7.93642	54368.8	1974.16	1996.72	1.01143	1729.61	1496.73	0.865356	2.04455	0.704875	0.752331	0.492533	0.55555	0.734569	0.72116	1.06277	1.05267	1.03986	4173.26	24.2658	3789.05	26.8608
5268605	3	2017-06-20	2015-05-12	770	1	52	2019-02-18	1964-10-24	54	-1	66.5	167	23.8445	20.5329	1.22378	23.6497	19.3252	1.27065	1.37686	4.91905	19.0379	8.13169	53094.7	18.2968	7.73098	0.324225	0.90423	7.74006	51027.9	1985.34	2066.8	1.04103	1725.32	1577.71	0.914442	1.88101	0.747517	0.819525	0.573936	0.515841	0.649529	0.847637	1.11837	1.10059	1.12532	4000.84	23.9803	2884.5	24.9226
5310712	3	2018-10-12	2015-11-09	1068	1	53	2019-02-18	1965-07-01	54	-1	66.2	170	22.9066	22.7407	1.20689	28.1849	23.3533	1.03839	1.08613	5.239	17.799	8.02444	51439.2	17.1183	7.63657	0.333379	0.963465	8.67007	49471.8	2070.16	1967.43	0.950375	1834.7	1618.25	0.882025	1.48296	0.751813	0.752792	0.533073	0.523476	0.70497	0.812385	1.03959	1.06503	1.10863	4054.77	24.7121	3396.4	23.7746
5312532	3	2017-08-10	2015-07-27	745	1	52	2019-02-18	1964-10-13	54	-1	71.8	165	26.3728	22.2719	1.15247	27.9125	24.2196	1.19195	1.41059	5.89268	20.5653	8.67169	55989	19.672	8.21215	0.311387	0.847751	7.74156	53557.1	2100.01	2431.91	1.15805	1857.12	1935.54	1.04222	2.04362	0.825144	0.867655	0.754998	0.677602	0.987218	1.03762	1.35103	1.20897	1.18962	4035.75	24.1583	3164.04	24.3189
5383241	3	2018-05-19	2015-07-13	1041	2	11	2019-02-18	2006-05-30	13	-1	25	127	15.5	23.3439	0.852741	25.1163	29.4536	0.667304	0.69886	3.8621	12.6823	5.11315	20455.3	12.2249	4.9139	0.317025	0.51133	6.16587	19717.6	1101.45	737.673	0.669728	882.188	504.869	0.572292	1.06176	0.461354	0.444532	0.401454	0.40965	0.497291	0.655845	0.707058	0.641652	0.655719	2713.84	24.7118	1019.49	26.3764
5512074	3	2017-09-21	2015-05-25	850	1	51	2019-02-18	1966-05-20	53	0	85.5	182.5	25.6709	19.8526	1.30474	25.0769	19.2199	1.23846	1.22966	5.13408	20.7269	9.75524	69033.7	19.8099	9.23765	0.35985	1.19852	7.63484	65979.3	2489.44	3054.4	1.22694	2247.74	2513.78	1.11836	2.23675	0.879212	0.812224	0.611344	0.564024	0.934405	1.2276	1.46565	1.36433	1.33991	4039.01	23.8755	4745.3	19.9586
5534985	3	2018-09-12	2016-05-18	847	1	51	2019-02-18	1966-12-22	52	0	70.7	168.5	24.9012	20.1084	1.17057	23.6846	20.2334	1.01156	1.0612	5.00837	19.8985	8.86879	56496.2	19.078	8.40114	0.337379	0.957896	6.62479	54166.8	2106.9	2329.47	1.10564	1856.82	1908.21	1.02767	1.68452	0.832796	0.839434	0.623796	0.590072	0.883024	0.963195	1.20923	1.24882	1.25803	4087.13	24.4827	4093.03	22.037
5537181	3	2018-11-07	2015-10-14	1120	1	50	2019-02-18	1968-08-16	51	0	76.1	183	22.7239	23.0013	1.16155	29.0852	25.0399	0.908008	0.903138	5.28068	17.6776	8.24291	59200.4	16.7984	7.71887	0.339681	1.13756	9.56667	56256.3	2415.84	2944.12	1.21867	2163.79	2452.56	1.13345	1.95022	0.849203	0.910643	0.632738	0.618381	1.07746	1.18144	1.32308	1.39186	1.37704	4132.74	24.1249	3791.41	24.2571
5554790	3	2017-10-26	2015-10-09	748	1	56	2019-02-18	1961-10-04	57	-1	77.7	172.5	26.1122	19.6075	1.16568	22.3549	19.1776	1.0727	1.22286	5.13509	21.0544	9.20082	62650	20.2766	8.80007	0.33701	1.00282	6.71111	60335.5	2143.42	2314.51	1.07982	1881.41	1752.94	0.931716	2.14336	0.758372	0.739774	0.625745	0.603766	0.820482	0.968906	1.18217	1.10538	1.07666	4444	24.0104	3586.54	19.4933
5557899	3	2017-03-07	2015-05-08	669	1	38	2019-02-18	1978-07-25	41	-1	86	179.5	26.6913	22.1855	1.15475	26.1952	22.6848	1.16841	1.20969	5.90436	20.7092	9.65371	66725.7	19.7252	9.16168	0.343246	1.10595	8.28465	63555	2420.15	3170.73	1.31014	2171.29	2572.55	1.1848	2.40362	0.887858	0.944707	0.835533	0.828642	1.04243	1.3505	1.53059	1.37112	1.36222	4068.29	23.6841	3599.11	22.9447
5571970	3	2018-09-19	2016-09-23	726	1	55	2019-02-18	1963-09-06	55	0	69.7	173	23.2884	23.3744	1.1685	28.4162	24.3185	1.13552	1.17833	5.42886	17.7968	8.21184	53264.1	17.057	7.7717	0.333715	0.998776	9.40121	51049.9	2126.65	2214.22	1.04117	1918.85	1944.62	1.01343	1.29735	0.696336	0.807961	0.578429	0.661464	0.818794	1.27709	1.32551	1.13848	1.24668	3296.59	24.8261	2730.18	25.8881
5586579	3	2018-09-20	2016-09-01	749	1	54	2019-02-18	1964-04-09	55	-1	68.5	167	24.5617	20.4431	1.02853	23.4498	22.7994	0.976054	1.0163	4.84994	18.8742	8.65461	52638.2	18.0765	8.21152	0.334323	0.932393	6.82603	50413.6	2110.06	2224.64	1.0543	1871.44	1815.36	0.970035	1.71517	0.765824	0.774838	0.645401	0.60798	0.850837	0.978028	1.1662	1.15648	1.18066	3915.03	24.2949	3389.59	17.9903
5589210	3	2017-09-22	2015-10-21	702	1	53	2019-02-18	1964-07-16	55	0	54.2	163	20.3997	25.1988	1.30869	35.204	26.9002	1.28229	1.40476	5.1878	15.3997	6.8561	40915.4	14.6891	6.47607	0.317459	0.843457	11.4789	39027.5	1861.11	1887.94	1.01442	1610.25	1406.59	0.873521	1.91884	0.75531	0.744727	0.470022	0.47697	0.749795	0.950053	0.999374	1.04944	1.05493	3754.03	23.9765	2592.92	22.4078
5613166	3	2017-09-22	2015-09-22	731	1	52	2019-02-18	1965-03-06	54	0	77.6	170	26.8512	23.3708	1.25904	30.1199	23.923	1.18348	1.22775	6.27998	20.5911	9.49087	59508.3	19.767	9.06435	0.337577	0.975598	7.97246	57126.7	2151.38	2381.6	1.10701	1881.01	1821.9	0.968574	2.07015	0.760213	0.751279	0.599797	0.578398	0.8472	1.00532	1.16589	1.1591	1.21276	4358.24	24.0179	3885.45	23.7146
5661531	3	2017-04-19	2015-11-03	533	1	39	2019-02-18	1977-11-08	41	-1	77.7	182	23.4573	19.3272	0.910934	19.6691	21.5922	0.863876	0.855479	4.55802	19.0255	8.98277	63020	18.0732	8.48237	0.361609	1.19779	7.00771	59865.8	2468.73	3154.23	1.27767	2227.03	2524.98	1.13378	2.60349	0.873692	0.947732	0.751492	0.757263	0.963609	1.22968	1.40865	1.28718	1.30397	4059.08	23.4596	3655.65	18.7872
5720506	3	2017-05-10	2015-06-30	680	1	48	2019-02-18	1968-10-13	50	-1	68.7	167	24.6334	25.8882	1.28052	30.9636	24.1805	1.28486	1.37581	6.34216	18.1561	8.01607	50635.6	17.4642	7.65687	0.310833	0.866883	10.184	48705.9	1908.09	1929.7	1.01132	1690.28	1493.25	0.883429	2.00386	0.751122	0.758046	0.505792	0.542123	0.794528	1.02161	1.11768	1.0485	1.01622	3612.16	24.2302	3202.49	28.4916
5720514	3	2017-06-02	2015-06-24	709	1	60	2019-02-18	1957-02-06	62	-1	71	176	22.921	23.4487	1.17898	28.5094	24.1814	1.16877	1.17177	5.48576	17.9089	8.24078	55474.7	17.052	7.79872	0.340244	1.05394	9.80803	52820.3	2291.94	2654.42	1.15816	2045.07	1986.18	0.971205	2.70683	0.814515	0.850712	0.551921	0.605878	0.837728	0.972646	1.27573	1.12246	1.08861	3960.41	23.2383	3476.96	25.3069
5720529	3	2018-05-09	2016-05-05	734	1	56	2019-02-18	1962-12-13	56	-1	64	160.5	24.8445	22.0764	1.16843	26.6122	22.7762	0.925327	0.935606	5.40945	19.0938	8.66279	49186.1	18.4406	8.31837	0.334818	0.862499	6.48924	47503.4	1791.64	1682.73	0.939214	1567.24	1261.02	0.804616	1.87927	0.675714	0.700661	0.484099	0.486729	0.712344	0.717479	0.889355	0.944122	1.01348	3469.98	24.0871	3813.14	22.7479
5720531	3	2017-04-11	2015-06-04	677	1	48	2019-02-18	1968-05-28	51	-1	71.6	169.5	24.9215	23.2622	0.987446	25.4573	25.781	1.04058	1.19834	5.7849	19.0833	8.24865	54826.9	18.3031	7.83358	0.31433	0.903079	8.64922	52585.2	2023.56	2241.73	1.10781	1780.27	1772.08	0.995398	1.93042	0.767796	0.80233	0.628256	0.602674	0.789562	0.837111	1.26946	1.23301	1.25121	4051.38	24.1629	2833.79	24.4888
5720540	3	2017-04-17	2015-04-09	739	1	44	2019-02-18	1972-06-23	47	-1	70.9	167	25.4222	28.3934	1.05479	32.0092	30.3464	1.0869	1.21082	7.30795	18.4303	8.02861	51400.1	17.5415	7.58196	0.298241	0.831766	10.8626	48921.4	2088.47	2478.74	1.18687	1835.62	1874.72	1.0213	2.38888	0.779241	0.820386	0.682907	0.618938	0.875523	1.10603	1.40706	1.20968	1.20854	3997.77	23.7196	2654.67	31.9217
5720551	3	2017-07-21	2015-10-22	638	1	51	2019-02-18	1966-03-28	53	-1	88	170	30.4498	23.0872	1.28915	29.2901	22.7205	1.09213	1.24597	7.10401	23.6664	10.4513	68395.8	22.6511	9.90456	0.325275	0.940044	6.95429	65461.8	2311.45	2934.01	1.26934	2080.5	2397.95	1.15258	2.32113	0.848624	0.932867	0.574314	0.651838	1.0408	1.24675	1.55866	1.36102	1.32055	4010.12	23.7689	4409.6	23.9953
5720553	3	2018-07-27	2015-06-26	1127	1	57	2019-02-18	1961-06-11	58	0	68.3	167	24.4899	22.9027	1.26738	30.9751	24.4403	1.18123	1.26665	5.64193	18.9924	8.2324	52967.9	18.2953	7.85366	0.320689	0.89437	8.40172	51023.9	1931.89	1944.05	1.0063	1681.81	1529.45	0.909409	1.65787	0.724857	0.788334	0.593916	0.572552	0.834214	0.960545	1.10849	1.062	1.07279	3930.53	24.4473	3470.86	27.1377
5720557	3	2018-07-19	2016-06-02	777	1	53	2019-02-18	1964-09-29	54	-1	75.6	172.5	25.4064	25.0981	1.1083	29.2839	26.4225	0.970217	1.11132	6.47617	19.3273	8.41191	57510.8	18.516	7.98868	0.314436	0.935642	9.32739	55096.7	2082.41	2414.14	1.1593	1842.21	1829.36	0.993029	2.43453	0.83867	0.832128	0.570479	0.542951	0.797961	0.87117	1.36652	1.18183	1.2143	4184.96	23.8737	3664.37	24.5095
5720576	3	2017-05-09	2015-05-26	714	1	56	2019-02-18	1960-09-10	58	-1	72.9	172	24.6417	23.8871	1.06333	27.5732	25.9309	1.05575	1.26269	5.86924	18.7015	7.8799	55326.6	17.8298	7.42558	0.301342	0.89149	9.70741	52747.7	2187.22	2578.96	1.17911	1924.42	1987.38	1.03272	2.25107	0.853301	0.84037	0.73721	0.704767	0.882096	0.992056	1.29021	1.23581	1.21102	4222.96	23.813	3404.22	24.2522
5720577	3	2017-03-16	2015-04-17	699	1	59	2019-02-18	1958-08-20	61	0	69	170.5	23.7356	20.5987	1.27514	27.2171	21.3444	1.08871	1.25784	4.93779	19.0336	8.15614	55331.1	18.2183	7.73931	0.326064	0.947875	7.86243	52960.9	2094.04	2370.15	1.13185	1847.17	1756.48	0.950906	2.48575	0.809595	0.820748	0.595043	0.599	0.874766	0.883847	1.07416	1.1382	1.15123	4027.83	23.5681	3700.8	21.1789
5720578	3	2017-08-11	2015-06-12	791	1	50	2019-02-18	1966-12-02	52	-1	64.5	162	24.577	19.7525	1.0174	23.7689	23.3623	0.865677	1.023	4.81919	19.5787	8.22431	51382.4	18.8758	7.85528	0.319619	0.838807	6.07509	49537.6	1966.62	1844.79	0.938049	1716.96	1404.15	0.817808	1.76497	0.694882	0.719458	0.563282	0.572684	0.653128	0.731354	0.92292	0.967182	0.998174	3765.9	24.2559	2761.19	20.9024
5720580	3	2017-04-13	2015-04-21	723	1	52	2019-02-18	1965-08-12	54	-1	91.2	174	30.1229	23.8484	1.21855	29.8716	24.5141	1.13817	1.15392	7.1997	22.9897	10.8509	69603.6	22.1002	10.3688	0.344218	1.04215	7.35787	66910.5	2266.45	2693.12	1.18825	2022.37	2094.58	1.03571	2.45218	0.811983	0.868082	0.608628	0.67726	0.978484	1.05455	1.32178	1.20784	1.24583	4159.23	23.8542	4477.94	23.9935
5720587	3	2017-05-26	2015-06-02	724	1	54	2019-02-18	1963-05-27	56	0	91.9	178	29.0052	26.0217	1.26456	31.2643	24.7235	1.18756	1.30115	7.623	21.6718	9.42643	68665	20.8082	8.98641	0.309821	0.981637	9.65108	65928.7	2316.63	2736.25	1.18114	2045.86	2084.69	1.01898	2.40637	0.859224	0.823712	0.754775	0.572645	0.980959	1.10984	1.36679	1.17084	1.13765	4960.93	24.3636	4305.07	26.8687
5721706	3	2017-09-07	2015-07-21	779	1	54	2019-02-18	1963-01-11	56	-1	72.6	176	23.4375	27.455	1.00947	29.1048	28.8319	0.961009	0.975534	6.49188	17.1537	7.734	53135.2	16.3624	7.31291	0.312018	0.966506	11.4195	50684.1	2183.63	2451.01	1.12244	1956.67	1932.96	0.987881	2.28252	0.751082	0.80424	0.632058	0.648147	0.872851	1.06203	1.34874	1.11765	1.14606	3946.22	24.0437	3408.74	31.4448
5721711	3	2017-07-21	2015-08-18	703	1	47	2019-02-18	1970-09-26	48	-1	57.3	184	16.9246	14.8748	0.906458	14.9489	16.4916	0.892751	1.00068	2.49031	14.2514	6.2363	48249.6	13.6109	5.90584	0.34895	1.1814	7.70638	46081.2	2150.19	2168.39	1.00847	1892.16	1678.37	0.887013	1.89912	0.725605	0.735218	0.500037	0.568496	0.81312	1.0285	0.981773	1.03792	1.0492	3584.29	23.7777	2859.3	14.6861
5721713	3	2017-09-06	2016-09-12	359	1	59	2019-02-18	1958-02-12	61	0	74.2	175.5	24.0907	22.8132	1.11607	26.8722	24.0775	0.936584	1.03269	5.50909	18.6397	8.02536	57410.6	17.7572	7.54966	0.313385	0.965233	8.88886	54692.8	2221.46	2717.84	1.22345	1969.01	2197.59	1.11609	2.06085	0.846436	0.871967	0.636189	0.64133	1.12508	1.18745	1.4111	1.27558	1.34435	4126.33	24.0178	3888.07	26.3576
5721715	3	2018-08-07	2015-07-31	1103	1	55	2019-02-18	1963-09-11	55	-1	84	170	29.0657	24.8715	1.24881	28.5541	22.865	1.09136	1.3812	7.31328	22.0909	9.16072	63842.8	21.301	8.78055	0.302093	0.873048	8.48241	61559.9	2057.12	2282.93	1.10977	1806.65	1737.76	0.961871	2.17656	0.770215	0.786985	0.672701	0.620408	1.01314	1.15848	1.20205	1.10204	1.08466	4387.65	24.1138	3424.6	25.1733
5721719	3	2017-09-30	2015-10-15	716	1	54	2019-02-18	1963-08-22	56	-1	91.8	169.5	31.9524	29.4121	1.06662	30.0607	28.1832	0.974213	1.15647	9.4005	22.5608	9.48324	64817.8	21.651	9.02978	0.282601	0.81192	9.34713	62203.7	2212.3	2614.02	1.18159	1962.24	2007.83	1.02323	2.42422	0.794271	0.862486	0.645868	0.582121	0.969708	1.01681	1.26412	1.24382	1.26142	4793.6	24.8149	4029.05	32.0234
5721720	3	2018-06-11	2016-08-10	670	1	53	2019-02-18	1965-04-29	54	0	101.9	177.5	32.3428	25.989	1.46479	33.1581	22.6367	1.3246	1.69631	8.41704	23.9699	10.0612	75520.1	23.176	9.62946	0.297731	0.93804	9.34129	73018.8	2339.2	2501.29	1.06929	2094.26	2045.48	0.976709	1.86087	0.782682	0.769043	0.63592	0.625342	0.801712	0.977955	1.2391	1.22699	1.17696	4317.37	24.8575	3804.4	27.0847
5721728	3	2017-06-22	2015-06-29	724	1	53	2019-02-18	1963-10-27	55	0	75.8	172	25.622	20.4383	1.15618	25.1362	21.7408	1.06657	1.08169	5.21183	20.2885	8.98401	60021.4	19.3031	8.46059	0.330209	0.976889	7.01579	57106.4	2212.7	2914.97	1.31738	1948.31	2299.01	1.18	2.32972	0.862305	1.00428	0.688216	0.740726	1.01061	1.1127	1.58117	1.35596	1.36883	4281.53	23.7306	3198.48	26.9078
5721730	3	2018-09-28	2015-09-24	1100	1	46	2019-02-18	1972-01-28	47	-1	72.1	171	24.6572	23.4888	0.988628	24.964	25.2511	0.900495	0.961337	5.79365	18.8719	8.60274	55183.5	17.9783	8.11932	0.329289	0.962873	8.19265	52570.4	2281.52	2613.1	1.14533	2038.55	2233.2	1.09548	1.56357	0.787422	0.82769	0.637001	0.648008	0.886531	1.22137	1.51557	1.29969	1.24653	3970.81	24.4673	3065.2	21.5143
5721731	3	2017-09-19	2015-09-11	739	1	59	2019-02-18	1958-05-20	61	-1	57.9	167.5	20.6371	20.516	1.02355	23.6563	23.1119	0.856758	0.98644	4.22228	16.3581	7.06372	45894.7	15.5923	6.68423	0.323894	0.908724	8.08547	43746.1	2004.05	2148.66	1.07216	1752	1505.03	0.859032	2.55358	0.720601	0.749222	0.517607	0.568477	0.830439	0.800774	0.990218	1.03033	0.97911	3842.52	23.2415	2737.61	18.9307
5721733	3	2017-04-05	2015-10-16	537	1	53	2019-02-18	1963-04-09	56	-1	73.2	171.5	24.8876	26.5432	1.19627	29.831	24.9368	1.1603	1.23553	6.60208	18.2709	8.03098	53738.8	17.6346	7.6856	0.308812	0.908287	10.5859	51867.2	2029.54	1871.51	0.922138	1774.7	1447.33	0.815537	1.66452	0.675151	0.684033	0.472085	0.510074	0.766138	0.787501	0.98765	0.990771	0.975456	3908.03	24.7288	3237.58	30.7982
5721736	3	2017-09-22	2015-09-14	739	1	58	2019-02-18	1959-05-21	60	-1	88.9	172	30.05	34.7895	1.17825	37.3704	31.7168	1.25548	1.55935	10.4694	19.6242	8.87213	58056.2	18.7156	8.42382	0.280327	0.829318	13.7866	55368.2	2243.36	2687.93	1.19817	2016	2283.48	1.13268	1.77887	0.763339	0.799524	0.724754	1.87202	1.3201	1.119	1.346	1.14973	1.17035	3774.9	24.681	3322.69	30.0134
5721738	3	2017-09-30	2015-09-22	739	1	49	2019-02-18	1968-07-16	51	-1	70.4	167.5	25.0924	22.9584	1.06101	25.5074	24.0406	1.05218	1.13964	5.81532	19.5145	8.61521	54750.4	18.5797	8.1528	0.324911	0.911577	7.96399	52127.6	2178.46	2622.75	1.20395	1935.57	2077.88	1.07353	2.24328	0.780798	0.838412	0.714389	0.676481	0.96847	1.24499	1.5512	1.21444	1.19476	3790.33	23.607	3080.61	24.8814
5721740	3	2017-10-13	2015-10-23	721	1	42	2019-02-18	1975-11-27	43	-1	57.4	159	22.7048	24.0277	1.20211	29.0451	24.1618	1.23387	1.39012	5.41149	17.1104	7.26661	43256.9	16.3769	6.90091	0.303941	0.768392	9.36994	41402.5	1778.28	1854.4	1.0428	1541.36	1385.96	0.89918	1.97719	0.771868	0.795038	0.595994	0.505544	0.765011	0.864752	1.19036	1.05045	1.07677	3731.42	24.0351	2259.43	27.4962
5721742	3	2017-10-17	2015-10-09	739	1	43	2019-02-18	1974-07-28	45	-1	61.6	162.5	23.3278	24.4118	1.05241	29.1231	27.6728	0.919162	0.941361	5.68321	17.5974	7.8212	46468.2	16.7746	7.41536	0.317876	0.839392	8.38027	44295.5	1954.28	2172.7	1.11177	1685.9	1561.83	0.926405	2.27618	0.767162	0.80939	0.574059	0.601981	0.801492	0.944732	1.24331	1.0513	1.06327	4247.26	23.6857	2983.79	26.4263
5721746	3	2017-06-06	2015-07-24	683	1	57	2019-02-18	1960-12-23	58	-1	81	173	27.0641	27.2932	1.37021	35.3421	25.7931	1.09697	1.22532	7.4581	19.8677	8.63951	59462.1	19.0318	8.18099	0.302282	0.904701	10.2814	56960.4	2290.74	2501.7	1.09209	2045.86	2013.36	0.984115	1.99416	0.772037	0.769827	0.56985	0.572334	0.873747	0.970865	1.27013	1.23365	1.18394	3946.81	24.298	3309.16	32.4707
5721748	3	2017-05-02	2015-05-26	707	1	59	2019-02-18	1958-05-28	61	-1	67.8	160	26.4844	27.2423	1.23065	32.5841	26.4771	1.19687	1.43779	7.13376	19.0526	8.07015	48774.5	18.3167	7.70132	0.290787	0.744416	9.7507	46890.8	1821.29	1883.77	1.03431	1582.38	1405.55	0.888251	2.0017	0.756186	0.766015	0.591925	0.549953	0.859604	0.899627	1.04026	1.03727	1.06696	3978.26	24.2719	2663.04	27.8414
5721749	3	2017-05-19	2015-04-02	778	1	51	2019-02-18	1965-10-11	53	-1	67.2	169.5	23.39	20.2085	1.07238	21.9527	20.4709	1.05112	1.13221	4.75152	18.761	8.38509	53900.9	18.0945	8.03314	0.343444	0.986722	7.23269	51985.8	1987.33	1915.05	0.963629	1718.95	1512.89	0.880121	1.4985	0.72726	0.739495	0.531822	0.565507	0.703521	0.845677	1.07533	1.04794	1.09862	3770.21	24.4482	3025.66	20.8938
5721750	3	2017-08-16	2015-09-29	687	1	46	2019-02-18	1971-08-06	48	-1	58.7	161.5	22.5057	23.4185	1.0352	25.2317	24.3738	1.11849	1.17363	5.2777	17.2587	7.61016	45014.7	16.4772	7.1917	0.31955	0.833457	8.72802	42976.2	1877.83	2038.49	1.08556	1636.53	1499.38	0.916198	2.23418	0.728498	0.747694	0.527446	0.515702	0.734233	0.845357	1.00611	1.15969	1.14533	3625.08	23.6302	2398.32	27.0676
5721758	3	2017-07-21	2015-10-16	644	1	54	2019-02-18	1963-01-25	56	-1	92.3	172	31.1993	27.8484	1.06229	31.1326	29.307	1.03595	1.26229	8.81558	22.84	9.5795	67569.8	21.9624	9.13425	0.292771	0.866133	9.22152	64973.7	2252.92	2596.08	1.15232	1989.72	2036.99	1.02376	2.12421	0.833628	0.859243	0.641059	0.588363	0.985376	0.998083	1.55259	1.16204	1.18974	4932.28	24.6351	4118.53	27.9094
5721760	3	2017-05-25	2015-04-15	771	1	54	2019-02-18	1963-09-17	55	0	67.7	171.5	23.0176	24.4354	1.18162	31.6443	26.7805	1.21686	1.15749	5.61638	17.3682	8.33867	51083.8	16.712	7.94645	0.345233	1.01541	9.78617	49153.8	1997.68	1930	0.966121	1757.18	1540.34	0.876598	1.6202	0.749461	0.773502	0.468273	0.465761	0.669381	0.796264	1.04873	1.0373	1.04318	3662.96	24.3714	3572.81	25.823
5721765	3	2018-06-28	2016-06-16	742	1	47	2019-02-18	1971-04-05	48	-1	79.4	180	24.5062	22.8832	1.27648	29.1083	22.8036	1.20552	1.31185	5.6206	18.9416	8.50425	61370.7	18.0632	8.03513	0.327882	1.06234	9.86015	58524.6	2404.39	2846.09	1.18371	2123.1	2269.45	1.06893	2.04999	0.83822	0.853943	0.69457	0.73366	0.965693	1.13616	1.368	1.26033	1.20836	4144.83	23.6715	3424.96	24.0227
5721769	3	2017-07-17	2015-04-15	824	1	47	2019-02-18	1970-06-06	49	-1	71.5	169	25.0341	23.5937	1.12639	30.1269	26.7465	1.11664	1.11655	5.912	19.1455	8.89295	54681.6	18.1956	8.38691	0.335019	0.956847	8.38965	51968.4	2166.91	2713.17	1.25209	1916.05	2087.41	1.08943	2.4945	0.834299	0.871368	0.611973	0.644646	0.933976	1.20868	1.30264	1.28929	1.34462	4017.69	23.432	3477.11	25.2809
5721770	3	2017-09-11	2015-11-11	670	1	37	2019-02-18	1980-10-31	38	-1	81.1	179	25.3113	25.3679	1.3238	34.1921	25.8288	1.16395	1.25735	6.48258	19.0717	8.57255	61107.5	18.2488	8.11605	0.320649	1.02739	10.5899	58471	2263.67	2636.48	1.16469	2016.79	2119.25	1.0508	2.09512	0.844479	0.815819	0.610249	0.640853	0.819307	1.03011	1.17658	1.3573	1.27959	4016.06	24.0892	3809.94	26.8324
5721773	3	2018-04-08	2015-10-15	906	1	47	2019-02-18	1970-05-09	49	-1	61.1	167	21.9083	19.2519	1.15502	21.997	19.0447	1.06716	1.28233	4.20248	17.6264	7.24855	49158.3	16.8284	6.88808	0.314405	0.876845	7.76681	46932.7	1885.66	2225.54	1.18025	1635.98	1532.5	0.936748	2.77569	0.771849	0.798133	0.696312	0.605381	0.832143	0.856994	1.16211	1.10905	1.11205	4329.44	23.3954	2757.06	21.4738
5721776	3	2018-08-06	2016-09-08	697	1	53	2019-02-18	1965-06-26	54	0	77	177	24.5779	26.6525	1.35252	32.5504	24.0664	1.12631	1.43667	6.61942	18.2166	7.67103	57070.8	17.56	7.31631	0.297679	0.932598	12.148	55013.8	2095.44	2057.06	0.981684	1843.79	1651.92	0.895939	1.60989	0.722119	0.764722	0.567304	0.586843	0.808146	0.835096	1.13215	1.0612	1.10364	4266.82	24.857	2907.96	23.4592
5721777	3	2018-08-06	2016-09-08	697	1	56	2019-02-18	1962-06-12	57	0	73.9	166.5	26.6573	24.3289	1.25321	29.8841	23.8461	1.08358	1.08715	6.52986	20.3101	9.23484	56304.2	19.5957	8.85299	0.332104	0.920667	7.73382	54323.7	1992.73	1980.49	0.99386	1761.61	1542.07	0.875373	1.897	0.731422	0.741069	0.4829	0.521504	0.781148	0.900842	0.941669	1.08708	1.09761	4050.54	24.5782	3529.92	26.7793
5721780	3	2017-03-15	2015-07-23	601	1	54	2019-02-18	1963-05-27	56	-1	73	178	23.04	26.5436	1.13234	30.2512	26.7158	1.04108	1.19189	6.05722	16.7627	7.24682	53110.8	16.1068	6.90822	0.299835	0.949999	12.4548	51032.7	2032.72	2078.13	1.02234	1790.63	1544.56	0.862579	2.20399	0.684985	0.734015	0.571702	0.544509	0.709023	0.816072	1.01433	1.06447	1.04986	3980.14	23.9063	2861.97	28.8671
5721782	3	2017-08-09	2015-10-13	666	1	57	2019-02-18	1960-03-09	59	-1	95.1	168	33.6947	32.4802	1.18498	38.4585	32.455	0.99877	1.21302	10.9669	22.7979	9.42806	64344.8	21.9557	8.95259	0.265697	0.749904	10.2497	61967.9	2181.64	2376.91	1.08951	1955.47	1934.07	0.989056	1.95802	0.740641	0.810208	0.664019	0.611162	0.822895	0.941507	1.24181	1.22686	1.2152	4082.75	25.2161	3631.74	34.5789
5721784	3	2017-08-04	2015-09-28	676	1	52	2019-02-18	1965-10-28	53	-1	55.9	171.5	19.0057	22.1257	0.917618	23.6736	25.799	0.852822	0.885453	4.19397	14.7613	6.45302	43416.2	14.1524	6.14178	0.323155	0.950471	9.64379	41625.4	1904.91	1790.82	0.940111	1657.24	1343.29	0.810558	1.80699	0.604586	0.634432	0.468199	0.513935	0.727328	0.873795	1.02219	0.957464	0.958706	3549.51	23.9928	2469.71	27.4643
5721793	3	2018-09-26	2016-08-17	770	1	51	2019-02-18	1967-09-06	51	-1	67.8	169	23.7387	23.5318	1.23349	29.3251	23.7742	1.05638	1.12014	5.55281	18.0442	8.04356	51536	17.3504	7.64577	0.322081	0.919896	8.8461	49554.6	1944.13	1981.41	1.01917	1742.65	1657.84	0.951336	1.60589	0.78075	0.812433	0.596536	0.505595	0.822869	0.938424	1.19026	1.08496	1.13096	3525.55	24.6771	3038.12	23.5326
5723229	3	2018-07-13	2016-07-04	739	1	45	2019-02-18	1972-08-27	47	-1	81.1	170.5	27.8979	27.0671	1.42411	34.3065	24.0898	1.18885	1.41177	7.51821	20.258	8.83854	58890.6	19.5127	8.43411	0.30232	0.878852	10.0445	56724	2114.8	2166.55	1.02447	1878.16	1725.36	0.918645	1.86434	0.753231	0.793239	0.517849	0.514934	0.72567	0.868466	1.29114	1.13168	1.07392	3860.11	24.3741	3570.11	26.9815
5730507	3	2018-10-25	2015-07-01	1212	1	46	2019-02-18	1972-05-09	47	-1	80	172	27.0416	22.7339	1.38247	27.6718	20.0162	1.46455	1.54062	6.37381	21.6628	9.74633	64087.3	20.8069	9.27705	0.343065	1.01492	8.12221	61555.1	2247.15	2532.19	1.12684	2014.85	2090.38	1.03749	1.90187	0.777219	0.772831	0.601365	0.606484	0.915751	0.990578	1.32994	1.32736	1.29561	4271.22	24.6297	3764.24	25.5521
5730510	3	2017-03-08	2015-07-29	588	1	54	2019-02-18	1962-12-23	56	-1	70.4	166	25.548	24.497	1.33577	32.5247	24.3489	1.35577	1.37497	6.27044	19.3264	8.72629	53255.8	18.4112	8.26315	0.323437	0.891262	9.00603	50734	2160.94	2521.79	1.16699	1899.73	1873.42	0.986153	2.48217	0.776514	0.780745	0.634705	0.654758	0.922671	1.07926	1.24613	1.17384	1.17891	4235.76	23.7459	3609.59	26.0755
5730513	3	2018-06-28	2015-09-16	1016	1	50	2019-02-18	1967-11-23	51	-1	82.5	170	28.5467	26.2093	1.11185	29.9548	26.9414	0.971164	1.03357	7.53713	21.2203	9.40297	61326.7	20.3687	8.9523	0.313602	0.90631	8.32911	58865.6	2214.36	2461.04	1.1114	1952.82	1942.07	0.994491	1.98434	0.737585	0.794017	0.54164	0.531678	0.836765	1.06372	1.3495	1.14325	1.26554	4400.75	24.4954	3816.75	28.2774
5730521	3	2017-08-02	2015-06-12	782	1	51	2019-02-18	1966-02-16	53	-1	71.4	167	25.6015	22.3434	1.41948	28.3427	19.9669	1.2231	1.42864	5.66931	19.7042	8.66052	54953	19.0667	8.34045	0.32578	0.908568	8.07028	53175.1	1853.94	1777.91	0.958992	1609.45	1303.9	0.810151	1.93882	0.707672	0.742446	0.487622	0.476339	0.730109	0.685133	0.899186	0.979723	0.999627	3771.17	24.0464	3301.83	21.2872
5730528	3	2018-09-18	2015-05-12	1225	1	51	2019-02-18	1967-05-15	52	-1	78.4	170.5	26.9692	22.2635	1.04538	24.4941	23.4308	1.01471	1.19261	6.03627	21.0766	8.99498	61270.2	20.2539	8.52706	0.316178	0.919139	7.51978	58878.5	2180.38	2391.76	1.09695	1950.45	2018.78	1.03503	1.62215	0.785372	0.829138	0.704801	0.683424	0.847432	1.00651	1.39325	1.20987	1.21749	3744.5	24.6113	3247.97	25.4023
5730532	3	2017-07-26	2015-08-05	721	1	48	2019-02-18	1969-04-02	50	-1	73	167.5	26.0192	23.6808	1.08888	28.2772	25.9692	1.07008	1.15911	6.15753	19.8446	8.64172	55676.6	19.1049	8.23896	0.31665	0.8884	8.15118	53601.3	1936.76	2075.29	1.07153	1693.07	1606.14	0.948656	1.92521	0.808372	0.805219	0.535281	0.531404	0.793526	0.999641	1.18186	1.12758	1.13764	4358.59	24.3914	3411.34	26.2886
5730540	3	2017-09-19	2015-08-11	770	1	48	2019-02-18	1968-10-13	50	-1	62.8	168.5	22.1187	22.1514	1.05198	28.6953	27.2775	0.983452	1.08285	4.91276	17.2653	7.62363	49020.1	16.4602	7.19857	0.325452	0.924031	8.70807	46734.3	2082.1	2285.78	1.09782	1814.92	1674.74	0.922763	2.28699	0.793874	0.8132	0.525204	0.512956	0.716297	0.880173	1.11235	1.10397	1.11454	4099.4	23.5555	3129.79	21.4868
5730541	3	2017-09-05	2015-09-07	729	1	55	2019-02-18	1962-01-03	57	-1	68.1	170.5	23.426	24.7774	1.40967	31.861	22.6018	1.28954	1.3154	5.76435	17.5002	8.30221	50873.5	16.6818	7.86654	0.335804	0.97619	10.2584	48494.5	2169.7	2379.01	1.09647	1921.23	1856.69	0.966408	2.10217	0.767066	0.805395	0.557961	0.612789	0.841079	1.02124	1.24732	1.15019	1.12998	3682.11	23.9832	3556.24	23.4016
5730542	3	2017-10-31	2015-07-08	846	1	57	2019-02-18	1960-10-24	58	0	72.5	175	23.6735	23.511	1.30012	29.2269	22.4801	1.2109	1.44014	5.59824	18.2129	7.89055	55776.9	17.5045	7.51864	0.317598	0.972643	10.3066	53607.5	2020.38	2169.45	1.07379	1787.44	1634.98	0.914702	2.29452	0.7721	0.800966	0.638698	0.598698	0.774084	0.864023	1.20507	1.02099	1.047	3898.44	24.1	3856.88	22.2011
5730545	3	2017-03-14	2015-05-12	672	1	53	2019-02-18	1964-01-01	55	0	65.5	169.5	22.7983	21.3036	1.32623	30.6263	23.0928	1.26956	1.36621	4.99879	18.4658	8.16708	53052.6	17.7155	7.78653	0.34154	0.981254	8.50298	50897	2039.89	2155.58	1.05671	1736.47	1574.88	0.906939	1.91389	0.752019	0.765186	0.564846	0.559876	0.87251	0.800728	1.14993	1.04668	1.04411	5040.39	24.4344	3324.07	19.8722
5730547	3	2017-09-05	2015-09-07	729	1	56	2019-02-18	1961-09-03	57	-1	87.1	175	28.4408	30.2105	1.25402	36.4352	29.0546	1.22172	1.53115	8.59749	19.8611	8.23226	60824.6	19.0217	7.82148	0.275009	0.842215	12.723	58253.8	2197.97	2570.78	1.16962	1945.52	1980.99	1.01823	2.3363	0.738507	0.805394	0.660242	0.694408	0.977242	1.0977	1.40404	1.12774	1.19549	4200.93	24.1089	3179.6	34.5823
5730549	3	2018-07-02	2016-06-12	750	1	55	2019-02-18	1963-12-16	55	0	74.7	177.5	23.7096	24.801	1.206	31.4855	26.1073	1.04195	1.22061	5.85192	17.7436	7.55737	55903.3	17.0261	7.19812	0.303596	0.956516	11.0684	53642.8	2146.41	2260.53	1.05317	1890.4	1625.6	0.859924	2.48015	0.738572	0.770287	0.502004	0.519398	0.722217	0.788475	1.04614	1.05514	1.05381	4322.44	23.6281	3122.41	27.6266
5730550	3	2018-05-14	2016-05-04	740	1	48	2019-02-18	1969-12-16	49	-1	86.3	179.5	26.7844	26.1545	1.23429	33.9881	27.5365	1.06539	1.31968	7.03639	19.8668	8.35244	64011.3	18.9665	7.88567	0.294413	0.948605	11.0202	61110.6	2359.35	2900.65	1.22943	2110.46	2331.84	1.1049	2.28537	0.879381	0.919315	0.852863	0.805078	1.01301	1.1388	1.46289	1.20451	1.23248	4310.62	24.324	3624.99	27.0275
5730559	3	2017-08-18	2015-06-10	800	1	58	2019-02-18	1958-11-23	60	0	64	166.5	23.0861	23.3166	0.972215	25.3324	26.0564	1.04549	1.03694	5.41505	17.8089	7.93552	49370.4	16.8568	7.44434	0.322459	0.89393	8.63054	46731	2092.45	2639.4	1.26139	1850.35	1920.37	1.03784	2.97005	0.812306	0.808417	0.632323	0.623261	0.944911	1.05314	1.3204	1.24876	1.20745	4191.17	23.3269	3163.49	28.0035
5730561	3	2018-07-05	2016-07-28	707	1	55	2019-02-18	1963-06-25	56	-1	72.8	165.5	26.5788	21.0697	1.50318	28.8281	19.1781	1.35882	1.57122	5.57603	20.8886	9.13148	57214.4	20.1496	8.73361	0.328593	0.900025	7.2898	55190.2	1908.18	2024.21	1.06081	1675.09	1563.6	0.933445	1.97608	0.766037	0.797991	0.56391	0.542854	0.81361	0.796719	1.01788	1.17086	1.18595	3861.26	24.1225	3524.55	19.1667
5730566	3	2017-04-10	2015-08-03	616	1	55	2019-02-18	1962-12-19	56	-1	70.5	176.5	22.6308	21.2031	1.40187	28.965	20.6618	1.22313	1.51934	4.81453	17.8921	7.46431	55738.1	16.9985	7.02995	0.310636	0.967702	9.96996	52954.2	2170.09	2783.81	1.2828	1943.53	2235.73	1.15035	2.41905	0.893131	0.880882	0.826411	0.822555	1.17087	1.5921	1.49801	1.22828	1.24545	3710.82	23.6165	3248.38	21.2434
5730568	3	2017-05-11	2015-05-21	721	1	55	2019-02-18	1961-09-01	58	-1	70.5	170	24.3945	27.143	1.1922	31.932	26.7842	1.01941	0.999939	6.72844	18.0604	8.28218	52194.6	17.1974	7.79798	0.319662	0.923823	10.0564	49700.6	2160.94	2493.98	1.15412	1922.03	1974.94	1.02753	2.17254	0.835289	0.822641	0.61281	0.626289	0.882455	1.09459	1.33517	1.22141	1.18922	3707.91	23.8139	3276.54	30.7497
5730570	3	2017-07-18	2015-06-17	762	1	59	2019-02-18	1958-02-02	61	-1	69	162	26.2917	27.2397	1.18874	32.2129	27.0984	1.32551	1.36078	7.15753	19.1185	8.53895	50174.7	18.3565	8.13984	0.309597	0.812506	9.61842	48174.7	1904.91	1999.98	1.04991	1661.62	1487.52	0.895224	2.10637	0.725053	0.749757	0.505979	0.570206	0.819009	0.830798	1.13088	1.08021	1.06714	4103.03	24.4956	2890.5	31.4623
5730577	3	2017-10-10	2015-07-01	832	1	43	2019-02-18	1974-08-02	45	-1	70	165	25.7117	26.7788	1.14395	32.2061	28.1534	1.0497	1.1884	6.76705	18.5032	7.64125	50374.9	17.5705	7.2	0.280029	0.762378	10.1997	47835.8	2071.35	2539.07	1.22581	1803.77	1835.13	1.01739	2.63076	0.748673	0.817087	0.707654	0.691339	1.05214	1.20102	1.29797	1.14734	1.19881	4568.16	23.6587	2660.12	33.6779
5730579	3	2017-10-12	2015-09-07	766	1	49	2019-02-18	1968-10-08	50	-1	73.9	167	26.4979	23.8924	1.19646	29.5499	24.6978	1.15378	1.35254	6.29636	20.0567	8.73621	55936	19.206	8.30364	0.31337	0.873957	8.57085	53563.7	2075.73	2372.3	1.14288	1818.9	1746.66	0.960285	2.43601	0.798059	0.801517	0.607838	0.56795	0.865702	0.945583	1.14812	1.18128	1.16357	4466.17	23.9542	3800.97	23.2728
5730580	3	2017-09-27	2015-07-22	798	1	57	2019-02-18	1960-01-26	59	-1	74.5	171.5	25.3296	20.9148	1.17851	25.3622	21.5207	1.04618	1.05685	5.36715	20.2949	9.22361	59691.8	19.4306	8.76083	0.345873	1.01729	6.9938	57149.7	2219.07	2542.07	1.14556	1967.82	1934.74	0.983189	2.41721	0.775627	0.788428	0.621341	0.633547	0.860598	1.008	1.13972	1.21711	1.21878	4479.6	23.862	3663.92	22.598
5730585	3	2017-09-18	2015-07-29	782	1	49	2019-02-18	1968-03-02	51	-1	74.5	161.5	28.5635	27.6565	1.44177	35.6747	24.7438	1.08521	1.11457	7.95272	20.8027	9.21011	54258	19.9331	8.76825	0.306974	0.800657	8.39481	51990	2093.64	2267.97	1.08327	1836.42	1727.55	0.94072	2.10095	0.744196	0.766562	0.605359	0.606651	0.851274	0.927527	1.26176	1.10583	1.09793	4313.81	24.5854	3171.75	32.8892
5730588	3	2017-06-20	2015-07-22	699	1	58	2019-02-18	1958-11-19	60	-1	76.1	166.5	27.4509	22.8384	1.49464	29.0308	19.4232	1.3782	1.58328	6.32276	21.362	9.09551	59220.3	20.457	8.63131	0.314427	0.871663	8.0211	56711.4	2125.1	2508.9	1.1806	1876.63	1954.32	1.0414	2.23201	0.79423	0.857892	0.70149	0.72273	1.0315	1.17813	1.25062	1.20094	1.23303	4197.47	24.1891	3529.77	24.9024
5730594	3	2018-09-25	2015-06-11	1202	1	41	2019-02-18	1975-12-26	43	-1	81.9	176.5	26.2902	20.6736	1.22984	25.837	21.0084	1.05255	1.03248	5.47149	20.9946	9.78358	65402.8	20.2128	9.33203	0.354962	1.10579	6.87971	62967.4	2216.73	2435.41	1.09865	1985.62	1968.39	0.991323	2.02076	0.788192	0.780172	0.640728	0.552661	0.746653	0.870293	1.21601	1.24466	1.15003	4247.75	24.3685	3826.76	23.608
5730595	3	2018-12-11	2016-08-29	834	1	45	2019-02-18	1973-05-03	46	-1	85.5	167	30.6572	30.5478	1.23746	34.7201	28.0575	1.25198	1.43766	9.62273	21.8778	9.13708	61014.9	20.9974	8.62926	0.281475	0.785007	10.4473	58559.6	2163.79	2455.34	1.13474	1942.55	2092.17	1.07702	1.64153	0.756507	0.826836	0.689821	0.7155	0.951924	1.04677	1.3782	1.33178	1.37916	4123.28	25.3231	3098.02	38.8733
5730599	3	2017-03-15	2015-05-11	674	1	52	2019-02-18	1964-11-04	54	0	84.4	177	26.9399	23.0568	1.42762	30.9626	21.6882	1.29019	1.40375	6.13661	20.4786	9.12338	64157.5	19.6552	8.65218	0.321166	1.00618	8.95443	61577.7	2338.92	2579.84	1.103	2127.09	2206.18	1.03718	1.76396	0.804203	0.851626	0.596795	0.630775	0.992817	1.06034	1.28954	1.22105	1.22061	3314.54	24.5074	4205.58	24.7169
5730600	3	2018-07-17	2015-06-17	1126	1	39	2019-02-18	1978-08-08	41	-1	74.9	169.5	26.0701	24.8674	1.27413	30.0878	23.6144	1.37203	1.46552	6.47794	19.572	8.86837	56230.8	18.6636	8.40442	0.322378	0.9262	9.53469	53621	2173.27	2609.82	1.20087	1910.95	2152.78	1.12655	1.74227	0.793207	0.846	0.751363	0.618847	0.915198	1.28687	1.56812	1.35463	1.32479	4248.03	24.3083	3026.59	26.4631
5730703	3	2017-06-28	2015-06-08	751	1	43	2019-02-18	1973-10-23	45	-1	65	166.5	23.4469	22.2126	1.07438	23.8393	22.189	1.02294	1.11579	5.20449	18.2258	7.97074	50526.1	17.4781	7.56751	0.322751	0.894739	8.07185	48453.1	2051.44	2072.98	1.0105	1804.17	1634.78	0.906112	1.77218	0.75314	0.797789	0.536925	0.548181	0.762099	0.905797	1.12666	1.07578	1.093	3703.1	24.1212	3012.55	25.3718
5730704	3	2017-09-22	2015-06-17	828	1	59	2019-02-18	1957-11-04	61	-1	55.7	166.5	20.0922	19.4504	1.00472	23.0841	22.9756	0.999233	0.988499	3.94633	16.3429	7.58358	45306.1	15.4042	7.0613	0.351445	0.974286	7.50429	42703.9	2047.45	2602.23	1.27096	1798.99	2016.81	1.12108	2.35611	0.880322	0.899497	0.627586	0.679253	0.997622	1.07498	1.3207	1.35634	1.36788	3464.93	23.148	2947.61	20.0999
5730710	3	2017-03-10	2015-04-15	695	1	59	2019-02-18	1957-11-29	61	0	81.7	178.5	25.6416	27.2637	1.15715	33.5345	28.9802	1.21713	1.19866	6.97084	18.5974	8.45261	59255.5	17.7263	8.00248	0.312089	0.994387	11.5663	56480.1	2270.83	2775.37	1.22218	2003.65	2042.33	1.0193	2.74362	0.781192	0.808963	0.560501	0.603073	0.821507	1.08878	1.36093	1.24684	1.2296	4697.99	23.7497	3751.5	31.3393
5730714	3	2017-08-03	2015-07-01	764	1	52	2019-02-18	1965-11-09	53	-1	77.5	173	25.8946	26.2988	1.14297	29.2351	25.5783	1.0054	1.18465	6.77416	18.9842	7.90535	56817.9	18.148	7.48117	0.288908	0.864674	10.5141	54315.1	2244.55	2502.81	1.11506	1963.44	1891.68	0.963453	2.17392	0.783666	0.811894	0.579219	0.570396	0.865691	1.11211	1.16652	1.18587	1.14805	4488.17	24.1031	3319.34	29.1585
5730716	3	2018-06-11	2016-09-13	636	1	59	2019-02-18	1958-12-26	60	-1	72.2	167.5	25.734	24.4532	1.16881	30.4421	26.0455	1.12447	1.36778	6.26483	19.3549	8.18524	54302.5	18.603	7.79103	0.302752	0.849409	9.25327	52193.2	2015.25	2109.33	1.04669	1743.44	1608.4	0.922542	1.843	0.790318	0.806563	0.605023	0.600745	0.80911	0.791196	1.09467	1.09211	1.11298	4327.14	24.5354	3084.99	23.5653
5730719	3	2017-07-13	2015-05-13	792	1	52	2019-02-18	1964-12-16	54	-1	54.3	155.5	22.4563	24.8365	1.2759	30.483	23.8914	1.30706	1.44754	5.59587	16.935	7.34739	40949.3	16.2256	6.99108	0.311319	0.752776	9.41707	39234	1724.53	1715.25	0.99462	1489.6	1280.52	0.859642	1.85047	0.630532	0.719515	0.549834	0.519695	0.714325	0.829825	1.23479	0.985688	1.03901	3626.31	24.2258	2002.17	28.0339
5730722	3	2018-07-26	2015-08-18	1073	1	54	2019-02-18	1964-04-25	55	0	70.6	159.5	27.7513	24.8536	1.17315	31.4196	26.7821	1.10329	1.37725	7.03597	21.2737	8.93675	54120.9	20.4575	8.5328	0.307474	0.782221	7.78357	52044.4	1880.13	2076.52	1.10446	1627.29	1501.05	0.922426	2.27599	0.774738	0.785734	0.619919	0.581732	0.843093	0.897146	1.08106	1.12703	1.13228	4178.75	23.8428	2880.71	23.9148
5730724	3	2018-07-25	2016-06-15	770	1	60	2019-02-18	1958-12-27	60	-1	67.7	170.5	23.2884	22.925	1.10016	25.8385	23.4861	1.13534	1.17338	5.34155	17.9585	8.11113	52205.8	17.2201	7.70307	0.330768	0.961552	8.95397	50059.2	2046.85	2146.66	1.04876	1796.38	1730.98	0.963592	1.6596	0.756471	0.739176	0.603767	0.641747	0.888148	0.959741	1.18616	1.13716	1.15896	3804.43	24.3737	2945.41	24.403
5730735	3	2017-03-16	2015-05-28	658	1	51	2019-02-18	1965-07-20	54	-1	68.9	172.5	23.1548	22.5789	1.04806	24.9485	23.8045	0.973534	1.04997	5.14915	17.6561	7.91751	52537.8	16.9382	7.54363	0.325791	0.969432	8.83446	50401.7	2003.65	2136.05	1.06608	1738.46	1592.9	0.916266	2.04818	0.777712	0.745375	0.57106	0.574375	0.676551	0.84291	1.05849	1.13078	1.11098	4008.72	23.8043	2921.14	22.7124
5730737	3	2017-05-05	2015-06-09	696	1	49	2019-02-18	1967-09-23	51	0	73.6	167	26.3903	20.9521	1.4027	28.3146	20.1858	1.22884	1.29113	5.57759	21.0431	9.24199	58687.2	20.1451	8.78565	0.332912	0.928458	6.94096	56182.8	2168.9	2504.42	1.15469	1908.89	1913.99	1.00267	2.27076	0.875905	0.841409	0.618396	0.607932	0.989034	1.10076	1.3213	1.14968	1.13823	4443.39	24.1925	4249.75	21.9016
5730739	3	2017-08-09	2015-07-29	742	1	53	2019-02-18	1964-10-08	54	0	73.1	177	23.333	25.3524	1.37852	33.0756	23.9935	1.32271	1.57255	5.9352	17.4756	7.45187	54749.4	16.6813	7.04386	0.301884	0.945772	12.4083	52260.7	2205.53	2488.67	1.12838	1958.66	1961.61	1.00151	2.13494	0.748651	0.825187	0.662515	0.642091	0.869646	1.09241	1.26436	1.19634	1.17459	4051.09	24.0232	2610.08	27.8488
5730740	3	2017-05-02	2015-07-28	644	1	50	2019-02-18	1966-10-13	52	-1	78.2	174.5	25.6812	23.1287	1.1655	27.0314	23.1931	1.22705	1.27932	5.92327	19.6867	9.16743	59946.6	18.7861	8.70324	0.338895	1.03194	8.81165	57204	2247.34	2742.54	1.22035	2018.79	2179.78	1.07975	2.46224	0.857769	0.85753	0.686547	0.73938	0.9148	1.13615	1.43776	1.26025	1.20239	4107.19	23.8772	3277.62	23.9166
5730741	3	2018-05-16	2016-05-18	728	1	56	2019-02-18	1962-08-21	57	0	84.3	182.5	25.3106	27.9398	1.23298	33.1479	26.8844	1.17482	1.45495	7.08359	18.2695	7.83352	60848.8	17.4799	7.42035	0.293172	0.976446	13.6093	58219.1	2349.47	2629.7	1.11927	2081.62	2037.63	0.978867	2.2104	0.794317	0.870143	0.579825	0.551269	0.891189	1.02698	1.24011	1.13177	1.20646	4633.26	24.1412	3525.86	27.3804
5730750	3	2017-03-09	2015-07-24	594	1	59	2019-02-18	1957-03-18	62	0	69.2	165.5	25.2645	24.4912	1.10789	28.1343	25.3945	0.951047	1.28978	6.10665	18.8275	7.34742	51568.9	18.0072	6.95476	0.275278	0.753994	9.53611	49322.1	1964.63	2246.75	1.1436	1720.15	1649.71	0.959048	2.44206	0.808446	0.829319	0.66249	0.662432	1.00909	1.01041	1.21348	1.10486	1.03195	4358.63	23.8239	2630.22	25.6279
5730756	3	2017-08-09	2015-08-12	728	1	52	2019-02-18	1965-06-23	54	0	75	168.5	26.4157	25.373	1.18185	28.4468	24.0697	1.11763	1.22548	6.72794	19.7882	8.90365	56183.2	18.9162	8.41702	0.318637	0.904683	9.01109	53707.4	2154.57	2475.84	1.14911	1924.42	1964.41	1.02078	2.22213	0.823963	0.820316	0.584259	0.634125	0.874218	0.914366	1.23403	1.2658	1.23609	3907.36	23.9665	3841.99	26.264
5730757	3	2017-09-22	2015-10-21	702	1	54	2019-02-18	1963-02-21	56	-1	66.6	164	24.762	24.4938	1.32198	30.1229	22.7862	1.3538	1.47883	6.1082	18.8296	8.28537	50644	17.9694	7.85866	0.317367	0.853591	9.31366	48330.5	2056.21	2313.51	1.12513	1793.41	1709.06	0.952962	2.30004	0.778734	0.808042	0.573379	0.581356	0.953417	1.0615	1.15103	1.11091	1.14502	4289.17	23.8546	3095.14	26.8654
5730758	3	2017-07-12	2015-07-01	742	1	44	2019-02-18	1973-10-27	45	-1	79.5	168.5	28.0006	20.7778	1.08613	22.956	21.1356	1.00655	1.13164	5.85514	22.3247	9.47291	63384.8	21.4369	9.03215	0.32257	0.915848	6.33528	60864.3	2175.67	2520.55	1.15852	1902.12	1967.81	1.03454	2.02059	0.761416	0.828665	0.670695	0.59747	0.894218	1.14738	1.48618	1.18043	1.16315	4484.63	23.8865	3492.44	24.2478
5730760	3	2018-04-28	2015-06-23	1040	1	61	2019-02-18	1957-03-18	62	-1	54.3	168.5	19.1249	17.9222	0.632783	13.8905	21.9514	0.565642	0.546675	3.39753	15.5596	7.22095	44177.2	14.7036	6.79592	0.355343	1.0089	5.50051	41746.9	2034.21	2430.27	1.1947	1789.66	1732.88	0.96827	2.85176	0.813083	0.825757	0.662832	0.632524	0.957503	1.02614	1.00047	1.10464	1.147	3895.27	22.9653	2765.04	16.1507
5730763	3	2017-05-23	2015-07-15	678	1	46	2019-02-18	1971-06-29	48	-1	75.5	172.5	25.3728	22.2124	1.2193	25.0506	20.545	1.23441	1.27129	5.59748	19.6023	8.78194	58329.1	18.7756	8.36865	0.329827	0.981443	8.39111	55869.3	2093.25	2459.87	1.17515	1831.24	1824.07	0.996082	2.42668	0.794134	0.817774	0.625243	0.684941	0.912256	1.05739	1.2746	1.14389	1.13513	4657.44	23.8401	3542.08	25.7147
5730768	3	2017-08-22	2015-07-30	754	1	57	2019-02-18	1960-06-09	59	-1	81.3	164	30.2275	26.6493	1.29904	33.7441	25.9762	1.31267	1.60634	8.147	22.4242	9.52229	60312.1	21.5386	9.07055	0.300076	0.807083	8.7091	57930.2	2039.09	2381.91	1.16812	1795.4	1806.71	1.0063	2.36039	0.777897	0.87374	0.655402	0.632288	0.867309	0.989262	1.30726	1.21368	1.21777	4243.96	24.2945	3387.91	28.4797
5730771	3	2017-06-07	2015-09-10	636	1	44	2019-02-18	1972-07-16	47	-1	73.4	174	24.2436	24.9918	1.1576	31.0052	26.7842	1.16524	1.15954	6.10535	18.3241	8.24511	55477.9	17.5681	7.85368	0.323948	0.980786	9.98477	53189.3	2221.86	2288.66	1.03007	1952.69	1715.78	0.878677	2.12833	0.715939	0.728337	0.483882	0.522331	0.774045	0.944675	1.10344	1.08808	1.03487	4071.44	23.7769	3493.64	29.4376
5730774	3	2017-08-08	2015-09-25	683	1	60	2019-02-18	1957-09-02	62	-1	73.2	172	24.7431	24.8548	0.885678	24.0619	27.1677	0.964798	0.977817	6.28109	18.9901	8.72056	56180.2	18.1379	8.23208	0.332702	0.984265	8.79988	53659.3	2270.83	2520.97	1.11015	2038.69	2007.6	0.984747	2.21148	0.781146	0.806435	0.624958	0.565595	0.837573	0.970781	1.06698	1.22967	1.21463	3955.8	24.0063	3072.11	24.2885
5730780	3	2017-06-06	2015-07-21	686	1	59	2019-02-18	1958-04-11	61	-1	56.8	170.5	19.5389	19.7543	1.07712	23.1965	21.5357	0.893055	0.988261	3.8559	15.6634	6.82205	45533.8	14.9482	6.44687	0.329951	0.959176	8.35846	43454.9	1993.3	2078.92	1.04295	1730.1	1528.34	0.883383	2.09185	0.73107	0.76323	0.493007	0.548709	0.812446	0.866297	1.06132	1.04807	1.06412	3742.89	23.6067	2820.53	21.0962
5730782	3	2018-09-25	2015-09-18	1103	1	50	2019-02-18	1968-07-26	51	0	63.3	166.5	22.8336	23.8259	1.39735	31.202	22.3293	1.30909	1.18212	5.45925	17.4539	7.90017	48386	16.792	7.53013	0.329782	0.914231	9.14632	46551.3	1827.59	1834.77	1.00393	1602.4	1478.6	0.922739	1.58168	0.704225	0.695922	0.522899	0.52141	0.84532	0.930721	1.12181	1.14683	1.13681	3699.58	24.9604	2969.33	30.4253
5730783	3	2018-10-19	2015-10-14	1101	1	41	2019-02-18	1976-11-23	42	-1	79.8	180.5	24.4934	21.7428	1.22943	26.1691	21.2856	1.21354	1.17922	5.31644	19.135	9.0479	62342.3	18.2539	8.54346	0.348807	1.13642	8.82066	59471.7	2383.45	2870.61	1.20439	2131	2474.21	1.16106	1.57019	0.855092	0.868823	0.74954	0.667304	1.13105	1.34629	1.49465	1.39029	1.34046	4145.37	24.5857	3954.06	24.0171
5730785	3	2017-03-22	2015-08-26	574	1	52	2019-02-18	1964-05-03	55	-1	61.4	164.5	22.6901	24.1865	1.18056	31.2373	26.4597	1.10345	1.32128	5.49093	17.2115	7.19163	46574.8	16.4636	6.81462	0.300334	0.812712	9.97551	44550.9	1887.39	2023.9	1.07233	1637.72	1437.7	0.877866	2.34797	0.711245	0.769062	0.526337	0.539542	0.702375	0.756258	1.07685	1.07378	1.05787	4012.29	23.6388	2730.68	25.8981
5730788	3	2017-08-03	2015-08-20	714	1	60	2019-02-18	1957-07-29	62	0	60.8	169.5	21.1624	22.897	1.07618	26.6938	24.8043	1.07846	1.03294	4.8276	16.2564	7.37741	46705	15.5036	7.0082	0.331163	0.95144	9.4217	44542.3	2031.13	2162.76	1.06481	1775.89	1508.85	0.84963	2.56198	0.69923	0.729054	0.586364	0.532263	0.793911	0.840355	0.99459	0.94978	1.01125	3914.8	23.2712	2616.61	28.3796
5730789	3	2017-08-09	2015-09-18	691	1	53	2019-02-18	1964-07-24	55	-1	80.6	170	27.8893	25.0757	1.42348	32.7242	22.9889	1.35121	1.48162	7.04389	21.0466	9.55524	60824.6	20.1235	9.07625	0.325439	0.940518	8.96506	58156.9	2196.77	2667.64	1.21435	1963.44	2125.95	1.08277	2.32152	0.838293	0.904849	0.623899	0.698376	0.988509	1.25193	1.47487	1.24516	1.25296	4250.02	24.0751	3655.73	24.9454
5730792	3	2017-08-15	2015-10-22	663	1	45	2019-02-18	1972-06-21	47	-1	65	163.5	24.3152	23.9854	1.16612	30.1678	25.8703	1.04459	1.02382	5.85736	18.5632	8.33351	49623.6	17.7334	7.92277	0.325836	0.871034	8.02732	47405.4	1955.47	2218.24	1.13437	1695.46	1675.44	0.98819	2.08759	0.723435	0.731016	0.600281	0.692385	0.889871	1.12812	1.29297	1.18405	1.16136	3988.27	23.7735	3138.79	29.2473
5730795	3	2017-08-03	2015-07-29	736	1	52	2019-02-18	1964-08-20	55	0	74.3	178.5	23.3191	22.9804	1.40798	31.7495	22.5497	1.25317	1.45931	5.37087	18.0007	7.68544	57354.2	17.2601	7.3092	0.313442	0.998698	10.7699	54994.4	2246.15	2359.76	1.05058	1974.59	1761.99	0.892332	2.20126	0.69159	0.72517	0.579133	0.577734	0.722948	0.920943	1.19318	1.05056	1.02659	4482.23	24.0158	2744.64	24.4591
5730796	3	2017-09-28	2015-07-27	794	1	54	2019-02-18	1963-09-28	55	0	59.5	156.5	24.2934	29.8278	1.24674	36.8234	29.5358	1.12438	1.34925	7.38713	17.3788	7.2504	42564.5	16.5842	6.84165	0.281626	0.689765	11.2813	40618.3	1802.57	1946.23	1.07969	1579.19	1478.96	0.936533	2.09177	0.736731	0.750908	0.585467	0.603337	0.894605	0.954188	1.15707	1.12999	1.1401	3680.48	24.0769	2488.43	30.3788
5730800	3	2017-07-31	2015-10-15	655	1	60	2019-02-18	1957-08-10	62	-1	61.7	160.5	23.9516	20.6642	1.13196	24.0919	21.2835	1.06718	1.43081	5.00351	19.2099	7.5437	49485.1	18.4375	7.16119	0.298985	0.770194	7.47124	47495.4	1916.85	1989.7	1.03801	1671.57	1499.37	0.896982	1.99908	0.737868	0.768998	0.534799	0.593571	0.87911	0.984577	1.10216	1.04449	1.07987	3807.86	23.9787	2723.62	21.9218
5730805	3	2017-06-21	2015-07-13	709	1	55	2019-02-18	1962-09-16	56	-1	77	175	25.1429	19.4896	1.01855	21.0758	20.692	1.09343	1.13558	4.94757	20.4381	9.21164	62591.7	19.6991	8.80742	0.350295	1.07278	6.80746	60328.6	2152.57	2263.05	1.05132	1884.2	1737.68	0.922238	1.95759	0.776541	0.78529	0.483243	0.602199	0.817769	0.820805	0.995223	1.11079	1.16296	4172.74	24.0663	4503.57	22.1388
5730807	3	2018-06-29	2015-09-28	1005	1	58	2019-02-18	1960-05-17	59	-1	69.6	171	23.8022	21.9765	1.03435	25.2541	24.4154	1.07249	1.16968	5.26796	18.7029	8.42356	54689.3	17.8219	7.91577	0.332565	0.972452	8.35055	52113.1	2146.41	2576.17	1.20022	1912.92	2001.14	1.04612	2.46279	1.00078	0.874777	0.606281	0.632578	0.786909	0.85465	1.15638	1.29291	1.25363	3762.62	23.5237	3200.71	22.6833
5730821	3	2017-08-03	2015-09-23	680	1	54	2019-02-18	1963-04-30	56	-1	67.7	168	23.9867	21.9004	1.08966	26.0863	23.9399	0.802024	0.874466	5.28418	18.8441	8.17919	53185.6	17.9473	7.70421	0.321187	0.906519	7.19266	50654.4	2086.48	2531.23	1.21316	1853.14	1898.65	1.02456	2.71105	0.821556	0.837164	0.64919	0.6587	0.870153	0.915281	1.14551	1.25426	1.29942	3879.45	23.3644	3681.13	23.4215
5730828	3	2018-07-31	2015-09-25	1040	1	52	2019-02-18	1966-01-28	53	0	68.1	164.5	25.1661	22.899	1.37535	29.1651	21.2056	0.996665	1.16814	5.89122	19.8358	8.32582	53676.1	18.9854	7.86446	0.312503	0.84564	7.73991	51375	2057.91	2301.11	1.11818	1823.24	1847.43	1.01326	1.93328	0.852039	0.85394	0.62818	0.550905	0.969911	1.12908	1.38399	1.14886	1.15929	3864.39	24.3748	2872.95	26.0646
5730831	3	2017-05-12	2015-05-19	724	1	46	2019-02-18	1970-11-03	48	-1	64.8	165	23.8017	23.3167	1.30193	30.7321	23.605	1.29782	1.5787	5.54874	18.2485	7.79689	49681.5	17.5087	7.41559	0.311558	0.848216	9.44652	47667.5	1898.93	2013.98	1.06059	1652.86	1523.87	0.921964	1.99169	0.742452	0.804056	0.608384	0.618453	0.726717	0.81031	1.16197	1.11589	1.12518	4027.39	24.1616	2669.1	22.6531
5730834	3	2017-05-11	2015-09-24	595	1	60	2019-02-18	1957-05-02	62	0	76	172	25.6896	26.0297	1.24261	32.4839	26.1416	1.1152	1.31608	6.63606	18.8582	8.30892	55790	18.1589	7.95483	0.309652	0.916075	10.2972	53721.4	2102.4	2068.57	0.983906	1845.18	1545.05	0.837343	2.03526	0.67188	0.694641	0.556317	0.579113	0.675192	0.797385	1.16743	0.981057	0.976142	3939.18	24.1872	3051.46	24.9719
5730837	3	2017-10-25	2015-09-18	768	1	55	2019-02-18	1962-11-08	56	-1	66.8	168.5	23.5275	22.1036	0.98867	25.9976	26.2955	1.05265	0.942527	5.36656	18.9125	9.24171	53696.9	18.0298	8.76383	0.372492	1.05759	7.26356	51190.7	2252.12	2506.24	1.11284	2000.87	1953.73	0.976441	2.19903	0.778049	0.80654	0.593425	0.601871	0.868937	1.00954	1.19662	1.13972	1.13734	3934.78	23.7591	3809.82	24.0104
5730845	3	2018-10-17	2015-07-07	1198	1	55	2019-02-18	1962-10-24	56	-1	62	173.5	20.5965	16.7537	0.771793	14.5726	18.8815	0.727207	0.756179	3.438	17.0829	7.73863	51423.3	16.4079	7.34797	0.356759	1.07392	5.69809	49391.5	2072.53	2031.78	0.980339	1816.13	1633.85	0.899634	1.55199	0.713304	0.734125	0.530039	0.569897	0.780876	0.869828	0.930974	1.10429	1.12797	4015.94	24.4795	2913.56	16.8621
5730846	3	2017-09-06	2015-09-23	714	1	45	2019-02-18	1971-10-29	47	-1	68.5	165.5	25.0089	30.9487	1.24605	37.4774	30.0769	1.2002	1.66432	7.73568	17.2595	6.9025	47274.1	16.5723	6.55455	0.262089	0.717867	14.0927	45392	1850.35	1882.13	1.01717	1609.06	1441.96	0.89615	1.82419	0.728004	0.719828	0.585656	0.601422	0.817173	0.929148	1.18384	1.06512	1.05632	4008.34	25.1283	2518.66	29.8636
5730847	3	2018-08-17	2016-09-06	710	1	50	2019-02-18	1968-03-20	51	0	70.3	170.5	24.1828	25.5814	1.04177	26.3628	25.3058	1.01594	1.18431	6.20778	18.059	7.58605	52498	17.4485	7.23253	0.299077	0.869426	10.2144	50723.3	1935.05	1774.66	0.917115	1708.28	1476.73	0.864455	1.31381	0.700417	0.701863	0.526142	0.471566	0.702016	0.785717	1.07959	1.05593	1.06696	3645.88	24.8466	2975.72	27.7781
5730848	3	2017-09-12	2015-09-14	729	1	53	2019-02-18	1964-09-10	54	-1	73.9	176.5	23.7222	22.4876	0.897251	23.9447	26.6867	0.983228	1.00711	5.42031	18.6833	8.46451	58202.6	17.7444	7.95642	0.3354	1.04485	8.61971	55277.9	2334.15	2924.65	1.25298	2087.67	2367.65	1.13411	2.25985	0.830676	0.992322	0.663523	0.734098	1.07177	1.31636	1.4455	1.26015	1.31752	4131.23	23.9334	3337.83	24.7552
5730849	3	2018-05-02	2016-09-23	586	1	46	2019-02-18	1972-09-23	46	-1	78.4	179	24.4686	20.5597	1.13369	23.9463	21.1224	1.13763	1.17648	5.03841	19.4679	8.97474	62377	18.5686	8.4936	0.347122	1.11221	8.07595	59495.6	2307.2	2881.43	1.24889	2053.96	2310.66	1.12498	2.25389	0.83886	0.856063	0.772299	0.638809	1.00097	1.11657	1.39802	1.35521	1.35338	4139.97	23.7162	3337.87	21.8127
5730854	3	2017-07-06	2015-06-18	749	1	49	2019-02-18	1968-11-10	50	-1	63.8	166	23.1529	20.1089	1.28407	25.3246	19.7221	1.12069	1.15899	4.6737	18.5682	8.35074	51166.6	17.648	7.8632	0.339621	0.93586	7.20391	48630.7	2119.53	2535.87	1.19643	1871.06	1951.66	1.04308	2.3513	0.832504	0.850216	0.577061	0.587299	0.912171	1.03614	1.20158	1.27403	1.32097	4018.88	23.6464	3687.72	20.3371
5730855	3	2017-09-14	2015-09-10	735	1	50	2019-02-18	1967-10-22	51	-1	76.8	174.5	25.2215	22.685	1.1575	28.4828	24.6071	1.09539	1.03057	5.71361	19.4731	9.33182	59296.1	18.6335	8.87923	0.35205	1.072	8.02838	56739.5	2241.37	2556.59	1.14064	1972.6	1995.02	1.01137	2.08939	0.815153	0.829181	0.581694	0.575065	0.921017	1.05013	1.2647	1.15095	1.22868	4172.51	23.9355	4058.36	23.1152
5730858	3	2018-08-09	2016-07-14	756	1	52	2019-02-18	1966-10-17	52	0	79.3	165.5	28.9519	25.8082	1.21425	33.1509	27.3015	1.01642	1.00911	7.54855	21.7001	10.091	59437	20.8843	9.63258	0.33271	0.9113	7.35999	57202.7	2061.07	2234.29	1.08404	1811.39	1792.5	0.989569	1.76943	0.749743	0.816845	0.491499	0.511024	0.85598	0.961462	1.27058	1.23547	1.21451	3917.45	24.7807	4259.66	27.7188
5730860	3	2018-05-16	2016-09-08	615	1	53	2019-02-18	1965-02-18	54	-1	85.9	175.5	27.8894	22.0406	1.42948	29.8004	20.847	1.24735	1.31136	6.20709	21.955	9.6281	67622	20.9868	9.12924	0.327338	1.00821	7.77829	64640	2341.57	2982	1.2735	2073.72	2437.44	1.1754	2.03302	0.852888	0.920569	0.709139	0.701764	1.13551	1.3938	1.75522	1.29569	1.30413	4527.8	24.3584	4326.31	26.3406
5730863	3	2017-06-01	2015-06-23	709	1	51	2019-02-18	1965-06-05	54	-1	73	170.5	25.1116	28.6797	1.37614	36.7752	26.7234	1.28188	1.4686	7.2555	18.0429	7.80181	52451.2	17.1228	7.35183	0.292766	0.851079	12.4665	49776.4	2122.31	2674.76	1.26031	1861.5	2011.12	1.08038	2.54454	0.794582	0.837282	0.602207	0.654374	1.03534	1.15488	1.56018	1.27986	1.27563	4172.2	23.4636	2965.85	32.0853
5730865	3	2017-08-07	2015-09-08	699	1	45	2019-02-18	1972-08-13	47	-1	57	163	21.4536	17.1898	1.08165	20.2681	18.7381	0.952037	0.969374	3.70945	17.8699	8.05905	47478.6	17.0474	7.63234	0.355761	0.945221	5.60743	45293.1	1889.38	2185.52	1.15674	1636.53	1609.58	0.983532	2.27785	0.828122	0.851147	0.582238	0.589811	0.839342	0.908756	1.06229	1.19929	1.18714	3651.29	23.3406	3079.67	17.2108
5730869	3	2017-09-28	2015-08-20	770	1	55	2019-02-18	1962-04-02	57	-1	72.7	174.5	23.875	21.4924	1.14795	27.0817	23.5913	1.014	1.26563	5.1889	18.9541	7.96018	57715.7	18.1052	7.50139	0.314194	0.956729	8.79098	55130.9	2150.58	2584.75	1.20188	1894.15	2011.6	1.062	2.23511	0.834506	0.845124	0.707727	0.663851	0.95126	1.00846	1.26649	1.28165	1.29898	4192.48	23.7965	3182.65	19.9039
5730870	3	2017-06-02	2015-07-20	683	1	54	2019-02-18	1963-10-21	55	-1	76.5	166.5	27.5952	28.0449	1.26251	33.8799	26.8354	1.19667	1.39047	7.87736	20.2111	8.62217	56029.6	19.3666	8.21296	0.297623	0.825079	10.1091	53688.7	2110.77	2340.89	1.10902	1867.48	1717.97	0.919941	2.56042	0.70419	0.74265	0.559584	0.621622	0.876485	1.02503	1.24408	1.09734	1.0645	4243	24.0424	3474.96	30.0262
5730871	3	2017-08-08	2015-07-30	740	1	59	2019-02-18	1958-04-05	61	-1	64.1	162	24.4246	24.2446	1.19974	28.1951	23.5011	1.16585	1.18456	5.84914	18.2764	8.27737	47964.6	17.5768	7.91765	0.324167	0.850743	8.41955	46128.7	1847.57	1835.96	0.993717	1611.84	1354.57	0.840385	2.04217	0.702452	0.748677	0.498551	0.512507	0.7056	0.840551	1.08453	1.01486	0.966082	3608.07	23.972	2966.88	27.4805
5730872	3	2017-03-16	2015-05-07	679	1	44	2019-02-18	1973-07-20	46	-1	70.2	176	22.6627	22.3175	1.04724	26.3699	25.1804	1.22086	1.37617	5.02981	17.5078	7.68146	54232	16.7458	7.27086	0.320829	0.993801	10.2003	51871.8	2128.68	2360.22	1.10877	1855.13	1814.72	0.978217	1.99413	0.788498	0.802058	0.596583	0.586596	0.708895	0.855911	1.21854	1.21278	1.19661	4223.9	23.9703	2801.33	23.2649
5730878	3	2017-05-04	2015-09-28	584	1	58	2019-02-18	1959-03-19	60	-1	77.6	168	27.4943	22.6723	1.22874	27.4793	22.3639	1.1162	1.19195	6.3108	21.5241	9.81644	60749.6	20.57	9.33379	0.33948	0.95815	7.15508	58056.7	2187.61	2692.9	1.23098	1945.92	2106.63	1.08259	2.42564	0.858331	0.870379	0.63817	0.60168	1.03523	1.29209	1.49887	1.26519	1.22944	3929.09	23.6326	4258.13	22.0156
5730879	3	2017-09-04	2015-10-22	683	1	54	2019-02-18	1963-08-05	56	-1	68.9	161.5	26.4164	22.3185	1.16865	27.4964	23.5283	1.10722	1.39922	5.91846	20.5997	8.55611	53728.6	19.7275	8.11425	0.307167	0.80116	7.43494	51453.8	1982.95	2274.82	1.14719	1743.64	1751.3	1.00439	2.18764	0.803284	0.895658	0.585626	0.645668	0.881122	0.987677	1.29315	1.16444	1.1908	3739.97	23.6587	3357.42	22.2262
5730884	3	2017-06-06	2015-08-24	652	1	56	2019-02-18	1961-09-06	57	-1	85.5	176	27.602	28.451	1.36377	36.4764	26.7468	1.23216	1.46091	7.913	19.8997	8.47865	61641.3	19.12	8.09115	0.293136	0.908018	11.7762	59226	2223.85	2415.28	1.08608	1962.24	1797.91	0.916251	2.35993	0.757132	0.795574	0.585259	0.531282	0.86792	0.9305	1.23336	1.08647	1.0459	4576.87	24.2001	3518.65	29.9487
5730885	3	2017-09-01	2015-09-08	724	1	51	2019-02-18	1966-01-01	53	-1	66	162	25.1486	26.1904	1.17964	28.9891	24.5745	1.14292	1.39448	6.74022	18.9953	7.8575	49851.2	18.1593	7.45781	0.29655	0.778265	9.65331	47657.3	2036.31	2193.87	1.07738	1790.63	1655.8	0.924702	2.19015	0.729164	0.759547	0.632267	0.625628	0.872773	1.01277	1.26698	1.06794	1.03675	3828.06	23.8764	2776.02	28.6751
5730886	3	2017-07-07	2015-08-20	687	1	55	2019-02-18	1962-01-11	57	-1	73.5	172	24.8445	22.629	1.27427	27.3795	21.4864	1.06743	0.987737	5.67225	19.394	9.2455	57375.3	18.6165	8.78005	0.3534	1.0455	7.69609	55075.1	2207.13	2300.17	1.04216	1964.63	1849.17	0.941231	1.85983	0.741941	0.795266	0.502506	0.540537	0.758533	0.868041	1.08491	1.14748	1.17013	4012.36	24.2658	3560.84	25.9258
5730890	3	2017-09-05	2015-10-15	691	1	53	2019-02-18	1963-11-23	55	-1	69.3	165	25.4545	22.8096	1.08389	27.3169	25.2025	1.12004	1.2216	5.90448	19.9814	8.86252	54399.4	19.0538	8.34854	0.327978	0.892921	7.6986	51873.9	2044.27	2525.45	1.23538	1802.97	1986.88	1.10201	2.23196	0.827348	0.867399	0.711568	0.661707	0.915657	1.06046	1.42408	1.30721	1.36906	3779.42	23.8909	3051.97	23.4184
5730893	3	2017-09-01	2015-09-08	724	1	48	2019-02-18	1969-04-08	50	-1	71.3	174	23.55	23.9055	1.19668	27.5788	23.0461	1.18896	1.32132	5.66144	18.0211	7.8815	54560.6	17.182	7.45424	0.316528	0.958321	10.2868	52020.2	2162.53	2540.44	1.17475	1915.26	1953.7	1.02007	2.37287	0.801684	0.838297	0.660947	0.642611	0.873325	1.0341	1.31278	1.20149	1.20575	4042.76	23.7222	2928.24	25.6573
5730894	3	2018-08-01	2015-09-23	1043	1	50	2019-02-18	1968-09-01	50	0	76.4	177.5	24.2492	23.1726	1.2882	28.9519	22.4747	1.051	1.21802	5.63052	18.6676	8.20628	58814.7	17.9219	7.80566	0.321894	1.01417	9.58831	56465.1	2160.63	2349.68	1.0875	1920.03	1895.55	0.987248	1.88751	0.8163	0.835593	0.631802	0.630554	0.867837	0.938893	1.17795	1.19831	1.14394	3866.4	24.1847	3168.66	23.2798
5730896	3	2017-05-08	2015-08-04	643	1	50	2019-02-18	1967-12-30	51	-1	51.3	172	17.3405	13.7167	0.854115	13.0804	15.3146	0.997505	1.03729	2.38719	15.0163	6.68939	44424.2	14.1631	6.28501	0.362448	1.07227	5.96788	41900	2048.25	2524.13	1.23234	1762.36	1779.31	1.00962	2.60523	0.799367	0.833974	0.704544	0.74384	0.959889	1.01282	1.02396	1.19512	1.23278	3961.78	22.7557	2426.55	13.8395
5730899	3	2017-09-14	2015-09-28	717	1	49	2019-02-18	1968-08-12	51	-1	77.2	175	25.2082	21.8625	1.12264	24.8397	22.1262	1.22342	1.29525	5.51878	19.7244	8.84612	60406	18.824	8.37639	0.332289	1.01763	8.47104	57648.5	2347.29	2757.48	1.17475	2083.69	2261.49	1.08533	1.88161	0.809722	0.852934	0.668594	0.692797	1.0528	1.27008	1.45413	1.26514	1.21525	4206.41	24.2414	3392.88	24.7466
5732641	3	2017-05-24	2015-05-19	736	1	44	2019-02-18	1972-09-25	46	-1	73.9	168.5	26.0282	29.5664	1.27045	36.0217	28.3534	1.28091	1.49749	7.67625	18.2865	7.83833	51919.4	17.4934	7.42029	0.285086	0.809424	12.4223	49667.7	2049.05	2251.66	1.09888	1809.74	1737.14	0.959887	2.15001	0.757316	0.793726	0.616098	0.657341	0.845676	0.980125	1.20314	1.15702	1.18353	4136.8	24.2981	2978.05	32.1535
5732708	3	2017-08-29	2015-08-26	734	1	50	2019-02-18	1966-10-18	52	-1	71.7	169	25.1042	27.9931	1.22148	32.8192	26.8684	1.09134	1.13697	7.01744	18.051	7.79003	51555.5	17.3484	7.43456	0.296149	0.84583	10.918	49548.9	2042.28	2006.57	0.982518	1785.05	1509.02	0.845367	1.93429	0.682669	0.682264	0.519899	0.525174	0.787478	0.875624	1.02457	1.03366	1.01168	4360.95	24.6553	3331.79	33.2734
5732726	3	2017-09-07	2015-05-13	848	1	53	2019-02-18	1964-06-10	55	-1	70	163	26.3465	24.4831	1.17592	30.0458	25.5509	1.0929	1.22536	6.46181	19.9312	8.45529	52955.1	19.1626	8.06397	0.306074	0.813208	8.17903	50913.2	1941.14	2041.87	1.05189	1707.41	1521.8	0.891295	2.22507	0.733471	0.790563	0.570264	0.593588	0.897969	0.875656	1.09953	1.01268	1.052	4034.76	24.411	3371.23	29.0801
5732731	3	2018-10-17	2016-09-02	775	1	55	2019-02-18	1963-03-06	56	-1	72.6	174	23.9794	20.5321	1.07077	24.4304	22.8159	0.947844	0.876234	4.896	18.9496	9.22403	57371.9	18.134	8.75626	0.365158	1.10555	6.86502	54902.6	2166.56	2469.32	1.13974	1919.24	2070.25	1.07868	1.61361	0.76922	0.859589	0.585363	0.567066	0.953235	1.28883	1.31999	1.28225	1.2489	3798.98	24.2908	3934.02	21.724
5732744	3	2017-07-14	2015-06-16	759	1	51	2019-02-18	1965-09-10	53	-1	78.1	169	27.345	27.8043	1.13273	30.7076	27.1094	1.05045	1.26488	7.66859	19.912	8.27157	56870.6	19.0918	7.87613	0.288028	0.822637	10.2724	54528.1	2099.22	2342.5	1.11589	1836.02	1769.76	0.963909	2.17609	0.747809	0.765904	0.580911	0.569785	0.939879	0.971888	1.30715	1.12363	1.13231	4149.25	23.9965	3628.68	31.125
5732752	3	2017-04-06	2015-08-04	611	1	53	2019-02-18	1963-12-30	55	-1	65.9	168.5	23.2106	19.7541	0.983422	22.2679	22.6433	1.12146	1.16783	4.52933	18.3992	8.2343	52239.5	17.6754	7.85014	0.338214	0.960266	7.25223	50184.5	1973.79	2055.04	1.04116	1726.52	1576.69	0.913218	1.93453	0.734048	0.76779	0.610981	0.622591	0.798366	0.823153	0.997236	1.11834	1.11403	3858.66	24.0175	2826.57	22.5179
5736993	3	2017-07-26	2015-07-21	736	1	56	2019-02-18	1960-08-10	59	-1	78	171.5	26.5196	24.9313	1.32634	31.2426	23.5556	1.34264	1.5223	6.5742	19.7951	8.80483	58221.8	18.8855	8.31518	0.313549	0.922218	9.86374	55546.4	2139.04	2675.45	1.25077	1899.33	2120.74	1.11657	2.31415	0.867181	0.904156	0.737531	0.715689	1.14864	1.16705	1.40489	1.29351	1.29825	4285.08	24.2375	3739.42	24.5667
5736995	3	2017-09-27	2015-09-24	734	1	60	2019-02-18	1957-03-01	62	-1	72.5	164.5	26.7921	21.2037	1.19278	26.3589	22.0988	0.976057	1.11769	5.82861	21.66	8.87631	58612.5	20.7093	8.40646	0.313767	0.849061	6.46857	56039.8	2067.36	2572.74	1.24445	1816.91	1946.13	1.07112	2.50185	0.849218	0.884653	0.633112	0.630828	1.14434	1.2753	1.33029	1.23394	1.25145	4501.04	24.1583	3781.59	25.1617
5736998	3	2018-10-17	2015-09-09	1134	1	49	2019-02-18	1968-11-23	50	-1	76.7	167	27.5019	26.9894	1.13418	30.6391	27.0143	0.979762	1.1832	7.39921	20.016	8.59109	55822.6	19.2419	8.16372	0.296842	0.827863	9.30015	53663.7	2048.83	2158.93	1.05374	1826.4	1782.26	0.975832	1.69347	0.788179	0.769333	0.567202	0.565755	0.902736	0.97507	1.25107	1.19065	1.1757	3721.33	24.5616	3440.04	26.0589
5791928	3	2017-08-18	2015-07-31	749	1	52	2019-02-18	1965-01-29	54	0	83.5	183	24.9336	22.5504	1.26061	28.3983	22.5274	1.23599	1.39326	5.51063	18.9263	8.37639	63382.2	18.1257	7.9678	0.319561	1.07018	10.2413	60701	2423.74	2681.21	1.10623	2147.8	2059.12	0.958714	2.25443	0.773943	0.799487	0.654801	0.635641	0.907526	1.01523	1.20457	1.10301	1.10493	4523.73	23.7133	3314.59	22.7695
5817695	3	2018-09-30	2016-03-21	923	1	48	2019-02-18	1970-02-08	49	-1	64.7	172	21.8699	21.9047	1.04127	24.7329	23.7526	0.954769	1.06007	4.79605	17.099	7.41486	50585.8	16.3307	6.98792	0.319522	0.945273	9.00855	48312.9	2102.95	2272.87	1.0808	1848.92	1822.06	0.985472	1.77464	0.783021	0.796899	0.585896	0.577049	0.884472	0.966205	1.19808	1.19506	1.20076	4219.52	24.3162	3007.19	22.5577
5820624	3	2017-05-18	2015-09-11	615	1	51	2019-02-18	1965-07-26	54	-1	79.4	165	29.1644	23.497	1.04063	26.3371	25.3088	0.937319	1.03359	6.87125	22.3719	9.7992	60907.4	21.5524	9.38273	0.321719	0.87588	6.60006	58676.3	1990.51	2231.15	1.12089	1741.25	1674.67	0.961764	2.23248	0.78374	0.800463	0.655556	0.611557	0.882699	1.01528	1.11569	1.16122	1.15271	4243.19	23.9476	3514.53	25.0618
5836701	3	2017-05-26	2015-07-08	688	1	53	2019-02-18	1963-08-08	56	-1	61.6	170	21.3149	16.7221	1.09974	19.7498	17.9586	0.953078	1.10706	3.57285	17.7932	7.59883	51422.2	16.9135	7.15282	0.335579	0.969822	6.38804	48879.9	2158.95	2542.34	1.17759	1914.06	1933.14	1.00997	2.48775	0.819509	0.8468	0.686039	0.652585	0.96043	1.17665	1.15047	1.15826	1.19829	3821.19	23.3	2680.9	16.6366
5878017	3	2017-03-21	2015-05-15	676	1	55	2019-02-18	1961-12-02	57	-1	81.4	170.5	28.0011	26.0483	1.17907	31.1342	26.4057	1.35794	1.71233	7.16326	20.3366	8.35926	59119.1	19.3438	7.85812	0.280636	0.815815	10.6381	56232.9	2263.27	2886.2	1.27524	2007.24	2205.43	1.09874	2.65894	0.805287	0.799796	0.716311	0.678778	1.10508	1.20931	1.47252	1.31861	1.30692	4370.51	23.6891	3267.44	28.2296
5878020	3	2017-06-16	2015-05-15	763	1	47	2019-02-18	1969-12-04	49	-1	73.9	166.5	26.6573	25.184	1.25295	30.4358	24.2914	1.16378	1.30841	6.73813	20.0174	8.77181	55492.9	19.1634	8.30725	0.311632	0.863913	8.86786	53125.4	2134.66	2367.48	1.10907	1893.36	1910.68	1.00915	1.89308	0.795734	0.849478	0.685231	0.618512	0.8871	0.949719	1.2633	1.21343	1.19244	3896.25	24.4616	2995.29	27.7197
5878021	3	2018-10-22	2015-05-18	1253	1	56	2019-02-18	1962-01-16	57	0	75.1	173.5	24.9483	23.158	1.47239	29.6758	20.1549	1.31886	1.38784	5.89125	19.5481	8.76776	58844.2	18.9048	8.40509	0.3369	1.01415	8.98767	56907.7	2132.58	1936.42	0.908019	1903.44	1622.44	0.852373	1.37026	0.695309	0.688376	0.602491	0.609391	0.813905	0.916882	1.03652	0.982404	1.02012	4029.42	25.1066	3218.9	25.9092
5878035	3	2017-07-17	2015-05-27	782	1	52	2019-02-18	1964-10-01	54	-1	61.9	168.5	21.8017	21.8786	1.3267	26.3989	19.8982	1.23311	1.32414	4.81484	17.1922	7.54012	48812.6	16.473	7.15728	0.32829	0.932089	9.14819	46770.5	2005.65	2042.09	1.01817	1777.49	1558.24	0.876653	2.12067	0.724043	0.754384	0.507239	0.527984	0.680176	0.850728	0.955627	1.11307	1.10475	3504.3	23.8343	2553.33	25.5136
5878073	3	2017-05-17	2015-05-29	719	1	52	2019-02-18	1964-08-10	55	-1	64.8	167.5	23.0965	25.1476	1.24576	29.8073	23.927	1.10748	1.13229	5.81825	17.3181	7.63098	48588.2	16.6424	7.26734	0.314652	0.882795	9.83487	46692.4	1885.79	1895.84	1.00533	1676.35	1424.05	0.849497	2.25258	0.701739	0.727228	0.521292	0.505419	0.73882	0.793984	1.00043	1.02963	1.02708	3587.15	24.0748	2906.81	31.0923
5878074	3	2018-06-19	2015-05-27	1119	1	36	2019-02-18	1981-11-17	37	-1	83.2	179.5	25.8223	28.2128	1.09671	33.9289	30.9371	1.00129	1.02821	7.3574	18.7208	8.42756	60318.9	17.9008	7.9881	0.309349	0.996731	11.436	57676.8	2272.04	2642.07	1.16286	1993.91	2048.59	1.02742	2.13385	0.851387	0.835611	0.637841	0.588047	0.914835	1.09861	1.35859	1.15704	1.21127	4692.07	23.9832	3656.16	29.8039
5878083	3	2017-03-14	2015-05-29	655	1	47	2019-02-18	1969-07-14	50	-1	80	182	24.1517	20.5936	1.24611	26.4785	21.249	1.14968	1.13083	5.00556	19.3009	9.01826	63932.2	18.5704	8.58951	0.355649	1.17805	8.18937	61512.5	2371.18	2419.72	1.02047	2133.46	1982.51	0.929246	1.83919	0.739753	0.770933	0.504557	0.503872	0.676131	0.814979	1.05597	1.16524	1.16247	3826.09	24.1809	3834.49	23.1521
5878086	3	2017-07-14	2015-05-29	777	1	42	2019-02-18	1974-11-04	44	-1	63.3	162	24.1198	22.8691	1.19491	30.4372	25.4723	1.10112	1.15578	5.58908	18.8504	8.3778	49470.9	17.8388	7.90635	0.327795	0.860265	7.8438	46816.1	1998.48	2654.85	1.32844	1737.27	1893.71	1.09005	2.91395	0.823772	0.885088	0.733735	0.737334	1.0136	1.18175	1.42003	1.26986	1.21141	4299.11	23.038	2541.63	24.6437
5878087	3	2017-05-09	2015-06-18	691	1	51	2019-02-18	1965-08-24	54	-1	78.1	168	27.6715	27.2161	1.01726	28.5861	28.101	1.10165	1.29687	7.48589	20.0194	8.18138	56502.9	19.0857	7.69133	0.277951	0.78449	10.1179	53867.6	2115.54	2635.31	1.24569	1880.62	2049.04	1.08956	2.49554	0.82731	0.843377	0.661767	0.638999	0.913289	1.03565	1.50807	1.33272	1.29245	3958.63	24.2895	2692.24	35.54
5878089	3	2018-10-09	2015-06-03	1224	1	57	2019-02-18	1961-06-13	58	-1	73	170	25.2595	23.5211	1.3512	29.5604	21.8772	1.28565	1.46161	6.05581	19.6904	8.64416	56905.4	18.9422	8.22738	0.325714	0.941313	8.97641	54743	2078.85	2162.36	1.04017	1832.33	1797.74	0.981122	1.47907	0.760835	0.786767	0.569123	0.5842	0.848744	1.02197	1.34354	1.16001	1.21448	3841.69	24.7949	3588.95	24.9235
5878201	3	2017-06-13	2015-10-09	613	1	58	2019-02-18	1959-03-19	60	-1	67.3	178.5	21.1222	24.0886	1.16285	29.4339	25.3119	1.1869	1.22775	5.09584	16.0587	7.45562	51166.5	15.4207	7.11228	0.336721	1.07287	11.6637	49133.7	2141.82	2032.87	0.94913	1867.08	1573.57	0.842796	1.67174	0.666014	0.677945	0.532023	0.55006	0.688266	0.806322	1.01663	1.03738	1.00695	3995.29	24.2709	3184.96	23.156
5878211	3	2017-11-29	2015-11-04	756	1	56	2019-02-18	1961-08-09	58	-1	92	169.5	32.022	31.1782	1.33994	37.8896	28.277	1.2144	1.44863	9.81066	21.6557	9.05909	62217.4	20.784	8.59768	0.268493	0.771387	11.1041	59712.9	2107.18	2504.54	1.18857	1869.87	1890.65	1.01112	2.58677	0.804881	0.811651	0.586731	0.599093	0.906683	0.988882	1.28812	1.24876	1.24111	4311.5	24.1025	3521.25	35.8151
5878212	3	2017-08-29	2015-05-25	827	1	57	2019-02-18	1960-05-06	59	0	65.5	170.5	22.5316	19.3127	1.10299	24.8066	22.4903	1.01465	1.02021	4.3654	18.2383	8.35894	53019.2	17.3588	7.89021	0.350184	1.01799	6.98018	50462.6	2138.24	2556.66	1.19569	1893.76	1985.71	1.04855	2.33535	0.817713	0.836252	0.673035	0.674255	1.08404	1.28221	1.25605	1.24328	1.16077	3921.4	23.619	3534.94	20.5503
5878217	3	2017-09-05	2015-10-09	697	1	53	2019-02-18	1964-02-01	55	-1	77.2	174	25.4987	22.0332	1.38974	28.9106	20.8029	1.34085	1.54246	5.68332	20.111	8.5745	60888.1	19.2782	8.136	0.319074	0.966029	8.90872	58366.6	2283.18	2521.46	1.10436	2028.74	1968.35	0.970235	2.17382	0.777422	0.82986	0.669332	0.690144	0.886528	0.913641	1.19542	1.14159	1.1413	4607.96	24.2648	3501.72	24.474
5878218	3	2017-06-08	2015-10-14	603	1	54	2019-02-18	1962-08-16	57	0	59.1	166	21.4472	19.2875	1.08367	24.2461	22.3741	0.887828	1.13286	4.15952	17.4064	6.99998	47965	16.5169	6.56506	0.306103	0.843497	7.54428	45514	2039.49	2450.97	1.20176	1790.63	1926.96	1.07614	2.10562	0.837201	0.893799	0.637223	0.655201	1.00558	1.29261	1.48894	1.18942	1.16661	3613.75	23.7028	2717.86	20.5099
5878219	3	2017-10-27	2015-11-09	718	1	44	2019-02-18	1973-04-07	46	-1	69.7	169.5	24.2601	22.2354	0.924805	21.3427	23.0781	0.992686	1.18718	5.33787	18.6683	7.91273	53634.6	17.7651	7.45144	0.307148	0.882443	8.55433	51039.7	2174.47	2594.87	1.19333	1903.31	1981.77	1.04122	2.261	0.794217	0.894237	0.672655	0.666581	0.842844	1.0588	1.37851	1.17069	1.22972	4115.28	23.5188	2817.96	23.8572
5878221	3	2017-06-05	2015-06-09	727	1	63	2019-02-18	1953-11-14	65	-1	60	162	22.8624	22.3088	1.36154	27.8208	20.4334	1.21647	1.28093	5.10606	17.782	7.98298	46667.2	16.9654	7.56453	0.330873	0.868342	8.23861	44524	1934.37	2143.24	1.10798	1705.02	1647.52	0.966279	2.16135	0.748292	0.78679	0.561892	0.592221	0.845815	1.04531	1.2243	1.15896	1.16414	3548.35	23.7804	2726.44	22.6453
5878222	3	2017-06-05	2015-06-09	727	1	66	2019-02-18	1951-06-14	68	-1	77.1	179	24.0629	28.8114	1.29334	35.9113	27.7662	1.088	1.32739	7.01952	17.3442	7.21071	55572.4	16.4163	6.72268	0.279379	0.895159	14.241	52599.5	2324.59	2972.93	1.27891	2066.17	2328.09	1.12677	2.4953	0.900561	0.952375	0.747915	0.791815	1.10196	1.1218	1.47	1.28794	1.27121	4023.38	23.5384	3359.38	32.8837
5878225	3	2017-10-24	2015-10-22	733	1	49	2019-02-18	1968-11-23	50	-1	80.9	170.5	27.8291	24.6084	1.26338	30.3311	24.0078	1.05689	1.1921	6.83197	20.9308	9.11437	60846.3	19.9631	8.65208	0.3109	0.903794	8.48111	58033.2	2251.72	2813.02	1.24928	1985.74	2056.41	1.03559	2.84457	0.75577	0.868983	0.68769	0.636827	0.972449	1.0598	1.34151	1.1737	1.25995	4641.71	23.3593	3291.13	26.4117
5878227	3	2017-04-13	2015-07-20	633	1	53	2019-02-18	1962-02-03	57	-1	72	163	27.0993	23.7701	1.28589	31.53	24.52	1.22184	1.2206	6.62	21.2301	9.84911	56406.3	20.4672	9.41892	0.347571	0.923462	7.14723	54379.2	2005.65	2027.08	1.01069	1779.48	1569.68	0.882101	2.02239	0.689805	0.720016	0.550653	0.522937	0.842207	0.78703	1.06345	1.06955	1.08258	3621.65	24.1948	3789.85	24.0979
5878237	3	2018-10-23	2016-09-09	774	1	49	2019-02-18	1969-09-24	49	-1	69.1	168	24.4827	23.45	1.24279	27.1798	21.87	1.11014	1.36372	5.74258	18.746	7.976	52908.8	18.0163	7.60303	0.310547	0.876487	9.13066	50849.1	1995.49	2059.63	1.03214	1754.1	1604.5	0.914714	1.88545	0.806713	0.840457	0.583156	0.584392	0.779056	0.881008	1.18305	1.04468	1.10069	3971.25	24.185	3109.83	22.2954
5878250	3	2017-10-11	2015-10-13	729	1	53	2019-02-18	1964-12-06	54	0	76.8	184	22.6843	21.35	1.12173	26.7695	23.8645	0.980889	0.986	4.85488	17.8846	8.28264	60550.1	17.0995	7.85936	0.346467	1.173	9.07362	57892	2345.69	2658.11	1.13319	2063.38	2010.88	0.974557	2.29259	0.808271	0.826501	0.608251	0.604069	0.824194	0.889154	1.12166	1.16633	1.14283	4561.58	23.6889	3942.22	20.636
5878252	3	2017-06-19	2015-08-05	684	1	53	2019-02-18	1963-12-28	55	-1	71.1	160	27.7734	24.6748	1.20323	28.6	23.7693	1.252	1.42687	6.89122	21.0369	9.09583	53854.5	20.1871	8.65821	0.311744	0.798065	7.87541	51679.1	1938.35	2175.43	1.12231	1693.87	1700.34	1.00382	1.94326	0.773051	0.819192	0.574109	0.65865	0.929249	0.957922	1.4492	1.17774	1.21643	4244.95	24.6174	3325.15	26.6245
5878253	3	2017-09-21	2015-11-13	678	1	54	2019-02-18	1962-10-17	56	-1	63.5	163	23.9	19.8147	1.10703	23.0621	20.8324	1.19705	1.17735	4.72537	19.1224	9.02393	50806.3	18.2673	8.56671	0.358439	0.952337	6.55611	48534.5	1976.58	2271.84	1.14938	1718.95	1702.48	0.990418	2.21002	0.794467	0.816374	0.570059	0.545051	0.78205	1.02745	1.09572	1.21969	1.22825	4052.01	23.7589	3436.74	18.5232
5878255	3	2017-07-17	2015-07-24	724	1	50	2019-02-18	1966-10-19	52	-1	90.3	169	31.6165	31.2939	1.42144	37.069	26.0785	1.32861	1.5522	9.83629	21.5957	9.42497	61679.4	20.7848	9.01354	0.285089	0.814244	10.9846	59363.5	2140.63	2315.97	1.08191	1898.93	1846.53	0.972402	1.94227	0.784367	0.78357	0.618362	0.62156	0.901439	1.00446	1.3446	1.15486	1.11941	4101.46	24.6948	3090.13	34.3778
5878257	3	2017-05-18	2015-07-08	680	1	53	2019-02-18	1964-10-09	54	0	75	177	23.9395	19.8324	1.18847	25.6622	21.5927	1.04824	1.11777	4.65733	18.8261	8.57063	58980.2	17.8776	8.08709	0.337814	1.05834	7.76146	56008.8	2384.32	2971.41	1.24623	2138.24	2359.91	1.10367	2.48501	0.833761	0.862683	0.804572	0.707256	1.09689	1.43225	1.48267	1.20881	1.21746	3930.21	23.4649	3501.53	20.1047
5878259	3	2017-09-26	2015-10-29	698	1	42	2019-02-18	1974-12-28	44	-1	72	172.5	24.1966	22.0742	1.04862	23.978	22.8662	0.94453	1.01176	5.4291	19.1657	8.41988	57029.9	18.3193	7.98433	0.329977	0.981889	7.92047	54511.3	2209.12	2518.66	1.14012	1939.15	1901	0.980325	2.2879	0.812752	0.833648	0.628812	0.617489	0.855327	1.02846	1.17422	1.15248	1.13418	4518.33	23.9215	3145.42	23.7622
5878262	3	2018-09-13	2015-10-13	1066	1	50	2019-02-18	1968-09-27	50	0	71.2	170.5	24.4924	21.7784	1.05605	24.3302	23.0388	0.964449	0.964403	5.34332	19.1916	8.8232	55790.6	18.4879	8.41198	0.343453	0.998426	7.28462	53744.7	2055.15	2045.87	0.995486	1826.01	1664.03	0.911293	1.66642	0.771898	0.790248	0.56077	0.537456	0.801875	0.72028	1.00058	1.11095	1.12574	3951.62	24.5343	3667.76	23.9898
5878266	3	2017-08-09	2015-10-20	659	1	53	2019-02-18	1964-06-26	55	-1	85.3	175	27.8531	20.2304	1.18065	23.4104	19.8284	1.23964	1.2425	5.67879	22.3918	10.1097	68575	21.4005	9.60137	0.344715	1.05569	6.72068	65539.1	2375.56	3035.9	1.27798	2111.56	2419.41	1.14579	2.33527	0.826537	0.896194	0.679304	0.627092	1.08944	1.3024	1.54691	1.35901	1.33317	4230.2	23.6038	4186.98	25.1023
5878267	3	2018-11-07	2015-10-14	1120	1	56	2019-02-18	1962-09-22	56	-1	69.9	171.5	23.7656	25.8075	1.17882	30.4633	25.8423	1.09476	1.22007	6.08505	17.4935	7.69085	51452.4	16.747	7.2685	0.305841	0.899548	10.8379	49256.8	2026.31	2195.63	1.08356	1802.7	1847.37	1.02478	1.55748	0.773356	0.839671	0.596442	0.615212	0.886681	1.03289	1.52643	1.19594	1.17916	3864.51	24.8584	3071.95	27.2644
5878275	3	2017-08-07	2015-10-15	662	1	56	2019-02-18	1961-05-21	58	-1	58.4	165.5	21.3215	21.226	1.23295	28.7479	23.3164	1.00972	0.933441	4.55231	16.8946	7.81978	46274.6	16.2698	7.5053	0.352007	0.964156	7.46401	44563.3	1792.62	1711.35	0.954664	1557.69	1227.53	0.788043	2.05944	0.638027	0.650725	0.521734	0.520602	0.638761	0.687846	0.957562	0.967001	0.957422	3466.41	23.7181	2893.55	26.3093
5878277	3	2018-06-21	2016-06-27	724	1	66	2019-02-18	1952-12-05	66	-1	53.7	162.5	20.3361	24.9713	0.99613	27.7972	27.9051	0.939281	1.06249	5.09506	15.3086	6.60382	40424.3	14.6352	6.25934	0.307795	0.81277	10.3615	38646.1	1794.01	1778.16	0.991164	1563.68	1309.66	0.837551	2.03405	0.698238	0.717994	0.490568	0.491791	0.785844	0.838731	1.00827	0.966728	0.994703	3361.77	23.83	2414.66	25.1834
5878278	3	2017-09-21	2015-11-11	680	1	43	2019-02-18	1974-05-10	45	-1	85	168	30.1162	26.6379	1.24476	32.2055	25.8729	1.17473	1.37909	8.10197	22.3132	9.44776	62976.8	21.5564	9.04033	0.300181	0.847232	8.71304	60840.8	2056.21	2136.02	1.03881	1819.69	1698.57	0.933436	1.84955	0.769994	0.778452	0.555431	0.559835	0.746961	0.912016	1.11176	1.14592	1.20399	4120.89	24.9366	3718.54	30.3294
5878280	3	2017-06-27	2015-07-14	714	1	52	2019-02-18	1965-02-04	54	-1	60.5	170	20.9343	21.0882	1.22183	28.4832	23.312	1.02873	1.07309	4.3983	16.4583	7.194	47564.6	15.8173	6.84525	0.326988	0.944996	8.70071	45712	1973.39	1852.55	0.938765	1722.54	1398.6	0.811939	1.80964	0.678866	0.725957	0.495264	0.492212	0.743475	0.8017	0.93669	0.946772	0.94369	3872.91	24.0544	2771.93	25.7129
5878283	3	2017-10-20	2015-10-10	741	1	53	2019-02-18	1964-09-15	54	-1	70	166	25.4028	26.459	1.31861	32.837	24.9028	1.19596	1.41365	7.0787	19.6748	8.42192	54215.8	18.9969	8.07408	0.317842	0.875845	9.70146	52347.8	1863.1	1867.96	1.00261	1628.17	1387.46	0.852162	2.04529	0.665213	0.710704	0.528046	0.508248	0.817891	0.791284	1.04279	1.04162	1.05453	4295.07	24.4756	3008.84	26.2482
5878287	3	2018-10-11	2015-11-13	1063	1	49	2019-02-18	1969-01-25	50	-1	75.7	178	23.8922	21.374	0.948248	21.9024	23.0978	0.926212	0.944364	5.10067	18.7632	8.70708	59449.4	18.1005	8.31866	0.348175	1.10316	7.83937	57349.7	2184.33	2099.69	0.961249	1939	1743.98	0.899422	1.44989	0.732098	0.749761	0.566054	0.565592	0.76657	0.824796	1.05779	1.08699	1.0686	4086.18	24.693	3334.66	21.321
5878288	3	2017-09-29	2015-09-24	736	1	59	2019-02-18	1958-09-23	60	0	71.5	175	23.3469	21.7122	1.2675	27.3831	21.6041	1.16387	1.27467	5.15775	18.5973	8.23106	56954.3	17.652	7.73762	0.331419	1.01497	9.03818	54059.4	2279.59	2894.92	1.26993	2011.62	2175.01	1.08123	2.68644	0.834072	0.890321	0.687344	0.658073	1.08498	1.20368	1.24788	1.25497	1.30873	4299.11	23.2256	3497.11	22.0891
5892106	3	2017-05-22	2015-06-19	703	1	55	2019-02-18	1962-02-14	57	-1	81.8	170	28.3045	28.6535	1.18209	33.225	28.107	1.10301	1.24532	8.09272	20.1507	8.78468	58235.4	19.3973	8.38052	0.296084	0.855684	10.3202	56058.1	2148.19	2177.28	1.01354	1902.12	1667.9	0.876867	2.07	0.718114	0.759416	0.53241	0.560982	0.766782	0.820067	1.08953	1.05735	1.04562	4232.1	24.2271	3503.41	31.7807
5895273	3	2017-07-25	2015-06-18	768	1	53	2019-02-18	1963-12-25	55	-1	68.1	162.5	25.7893	22.3292	1.53322	31.7915	20.7351	1.20022	1.21867	5.79375	20.1533	8.87043	53217.2	19.1828	8.36492	0.324356	0.856502	7.24932	50654.7	2111.56	2562.5	1.21355	1893.76	2015.42	1.06425	2.51175	0.762506	0.82792	0.660209	0.663099	0.959786	1.21655	1.38493	1.27946	1.27811	3799.11	23.8764	3190.65	27.2949
5989592	3	2018-08-30	2015-04-16	1232	1	45	2019-02-18	1973-05-20	46	-1	80.3	177.5	25.487	27.2522	1.18529	30.635	25.8461	1.23721	1.4897	7.12161	19.0107	8.08258	59895.4	18.2963	7.69542	0.301935	0.951284	12.0142	57644.9	2187.5	2250.59	1.02884	1946.9	1942.2	0.997588	1.28176	0.797553	0.819947	0.626688	0.597169	0.924367	1.20366	1.27471	1.13886	1.18711	4098.13	25.2375	3061.04	30.7071
5994279	3	2017-09-25	2015-07-22	796	1	55	2019-02-18	1961-10-16	57	0	77.7	164	28.8891	31.54	1.36468	38.5153	28.223	1.50734	2.29031	9.11897	19.7934	7.56452	53236.3	19.1029	7.22304	0.250027	0.672472	13.3661	51379.2	1875.04	1857.07	0.990415	1648.87	1394.74	0.845876	2.04418	0.741	0.736942	0.562849	0.576736	0.767015	0.924162	0.989155	1.00064	1.00746	4178.85	25.4909	2744.52	31.4629
5998147	3	2017-03-10	2015-05-07	673	1	37	2019-02-18	1979-08-22	40	-1	64.1	167.5	22.847	19.6607	1.11514	22.8931	20.5294	1.09717	1.12506	4.51777	18.4609	8.352	51794.5	17.5529	7.87594	0.344726	0.967171	7.06506	49246.9	2145.41	2547.6	1.18746	1892.56	2017.68	1.06611	2.09579	0.808381	0.861328	0.627446	0.592345	0.936585	1.16546	1.3364	1.26448	1.27078	3673.02	23.6575	3123.69	21.5611
6030316	3	2017-05-16	2015-09-23	601	1	54	2019-02-18	1963-03-08	56	-1	72	170	24.9135	19.4408	0.998282	21.2073	21.2438	1.04815	1.21684	4.90717	20.3344	8.42453	58766.4	19.3831	7.95422	0.319274	0.922701	6.91001	56017.3	2235.4	2749.1	1.22981	1947.51	2057.24	1.05634	2.40326	0.809498	0.856615	0.730102	0.75159	0.951964	1.09715	1.33568	1.21379	1.22003	4561.14	23.5719	2819.06	23.8072
6034001	3	2017-03-11	2015-03-31	711	1	28	2019-02-18	1988-06-14	31	-1	73.2	169	25.6294	23.7723	1.12745	26.5537	23.5519	0.966959	0.894547	6.16369	19.7644	9.24098	56449	18.8774	8.76727	0.342079	0.977013	7.45482	53915.6	2198.76	2533.34	1.15217	1947.91	2010.05	1.0319	2.08601	0.710963	0.742709	0.625515	0.646918	0.926652	1.09052	1.29582	1.28733	1.23889	4100.02	23.9564	3553.3	27.3414
6072812	3	2018-08-09	2015-06-24	1142	1	54	2019-02-18	1963-08-01	56	0	67	167.5	23.8806	21.2281	0.885993	21.0875	23.801	0.830583	0.865471	5.10934	18.9595	8.6257	53193.1	18.061	8.16966	0.342105	0.959817	6.73014	50672.4	2114.41	2520.78	1.19219	1859.19	1884.16	1.01343	2.49444	0.758465	0.842511	0.633857	0.570521	0.912775	1.09416	1.31813	1.16246	1.14625	4083.87	23.415	2882.94	21.8149
6165072	3	2017-06-05	2015-08-03	672	1	51	2019-02-18	1965-11-02	53	-1	77.3	168.5	27.2257	24.7393	1.34586	29.249	21.7325	1.2571	1.35844	7.03542	21.4028	9.15263	60767.4	20.4391	8.66739	0.318353	0.903875	8.5632	58031.3	2298.31	2736.05	1.19046	2064.18	2132.29	1.033	2.57875	0.831236	0.843672	0.663412	0.678084	0.986387	1.23433	1.35649	1.20984	1.18424	4737.59	24.2197	3848.05	28.6749
6168172	3	2017-06-01	2015-07-03	699	1	45	2019-02-18	1971-09-13	47	-1	69.4	162.5	26.2817	27.7597	1.30976	34.2091	26.1187	1.17718	1.21747	7.30258	19.0039	8.39159	50182	18.2813	8.00972	0.304765	0.804769	9.57046	48274.1	1883.4	1907.97	1.01304	1645.29	1520.01	0.923855	1.6293	0.724862	0.743525	0.560535	0.516013	0.743163	0.89249	1.15242	1.14247	1.12406	3824.07	24.7055	2872.9	31.8458
6186233	3	2017-04-25	2015-06-05	690	1	49	2019-02-18	1967-10-03	51	-1	68.7	169.5	23.9121	24.8588	1.15731	29.8066	25.7551	1.0329	1.11661	5.95777	18.0087	8.02836	51739.4	17.2468	7.58933	0.317385	0.911854	9.52859	49550.4	2078.51	2189.01	1.05316	1846.77	1699.1	0.920038	2.11401	0.768229	0.802027	0.535482	0.605986	0.695287	0.824485	1.05207	1.13531	1.11402	3613.76	23.9518	3063.52	27.4877
6252163	3	2017-05-26	2015-07-20	676	1	54	2019-02-18	1962-12-01	56	-1	75.9	178.5	23.8213	24.3881	1.36849	31.9373	23.3377	1.00672	1.14899	5.84925	18.1348	7.74916	57781.6	17.3001	7.33109	0.307754	0.980573	10.62	55122.1	2241.37	2659.5	1.18655	1974.19	1941.75	0.983568	2.68638	0.774982	0.822379	0.556635	0.576208	0.883056	1.03021	1.19072	1.20069	1.18199	4609.41	23.4387	3218.27	26.7118
6292296	3	2017-04-06	2015-09-23	561	1	45	2019-02-18	1971-05-11	48	-1	74.9	168.5	26.3804	25.6777	1.31732	31.8929	24.2104	1.26099	1.29058	6.77739	19.6167	8.95345	55696.2	18.8157	8.53822	0.323657	0.918935	9.27861	53422	2090.06	2274.12	1.08807	1835.62	1710.86	0.932032	2.21376	0.714118	0.738136	0.556773	0.601031	0.794156	0.935991	1.13994	1.18068	1.17296	4208.89	24.1149	3419.15	26.8772
6344590	3	2018-09-18	2016-05-18	853	1	43	2019-02-18	1975-05-06	44	-1	74.9	175	24.4571	25.2562	1.32505	30.8899	23.3123	1.14063	1.21967	6.3296	18.732	8.38214	57366.8	17.913	7.93266	0.324349	0.99332	10.2489	54858.7	2129.03	2508.08	1.17804	1869.86	1998.66	1.06888	1.96564	0.841656	0.863272	0.612281	0.615817	0.994023	1.05391	1.2444	1.30133	1.34721	4326.93	24.2122	3688.46	28.0217
6347528	3	2018-08-22	2016-05-24	820	1	37	2019-02-18	1980-09-16	38	-1	76.6	170.5	26.35	26.8672	1.05118	29.41	27.9779	1.10549	1.22808	7.10967	19.3526	8.54363	56258.5	18.5196	8.06695	0.306147	0.889976	10.1145	53837	2224.24	2421.54	1.08871	1978.9	2032.07	1.02687	1.5875	0.785671	0.789833	0.578349	0.604641	0.88794	1.02154	1.27764	1.32506	1.3185	4172.65	24.8199	3362.75	28.5219
6351465	3	2018-07-17	2016-08-09	707	1	57	2019-02-18	1960-08-11	59	-1	79.7	171.5	27.0976	27.391	1.29936	33.1938	25.5462	1.13678	1.47014	7.37682	19.5547	8.1499	57514.8	18.8392	7.76895	0.286703	0.843258	11.0367	55410.4	2080.04	2104.42	1.01172	1840.23	1679.67	0.912748	1.77123	0.779183	0.754306	0.555378	0.504026	0.849474	0.883854	1.12057	1.14546	1.1149	4160.11	24.9332	3441.95	24.6523
6353604	3	2018-05-25	2015-04-10	1141	1	47	2019-02-18	1971-04-27	48	-1	66.1	172.5	22.2138	20.0398	1.19631	25.992	21.7268	0.909578	0.938873	4.44768	17.7466	8.02874	52807.3	16.9311	7.58212	0.341324	1.01565	7.39875	50380.5	2160.24	2426.81	1.1234	1920.82	1924.36	1.00184	2.09866	0.799229	0.845148	0.610571	0.593027	0.907047	0.968347	1.28248	1.1736	1.1756	3826.29	23.8265	3001.84	22.3091
6353615	3	2018-07-02	2015-07-14	1084	1	54	2019-02-18	1963-11-25	55	-1	78	178	24.6181	26.0818	1.24686	32.7799	26.2901	1.20691	1.4102	6.60339	18.7146	8.17078	59295.4	17.8453	7.71715	0.313475	0.993214	11.5934	56540.9	2364.88	2754.43	1.16472	2097.02	2121.55	1.01169	2.36276	0.827	0.860688	0.61016	0.655427	0.958388	1.11865	1.25279	1.21329	1.15233	4270.59	23.7118	3585.48	27.1488
6353619	3	2017-06-15	2015-09-14	640	1	52	2019-02-18	1964-12-29	54	-1	85.7	175.5	27.8244	26.8859	1.42278	34.4817	24.2355	1.415	1.83158	7.56553	20.5739	8.79361	63368.2	19.7421	8.33158	0.299434	0.922263	11.3196	60806.1	2332.55	2562.13	1.09842	2081.7	2091.12	1.00453	1.8776	0.834431	0.847945	0.620473	0.608664	0.896158	0.870001	1.30801	1.20545	1.21102	4110.6	24.7289	3514.08	24.3967
6353620	3	2017-05-03	2015-04-23	741	1	48	2019-02-18	1968-10-17	50	-1	81.4	175	26.5796	22.0232	1.15758	25.9329	22.4026	1.22279	1.19957	5.86309	20.7593	9.70117	63575.3	19.7325	9.17775	0.345293	1.05746	7.80791	60430.7	2407.01	3144.58	1.30642	2148.99	2569.3	1.19558	2.22958	0.839475	0.885137	0.696198	0.677161	1.03098	1.36432	1.88238	1.28343	1.35497	4084.68	23.7919	4316.85	22.233
6353622	3	2017-05-22	2015-04-14	769	1	43	2019-02-18	1973-12-09	45	-1	72	169	25.2092	25.7439	1.09139	29.3737	26.914	1.10226	1.34758	6.53827	18.8591	8.03637	53863.4	18.083	7.64321	0.303191	0.865945	10.1555	51647	2104.79	2216.43	1.05304	1839.6	1692.92	0.920261	1.9741	0.759294	0.783923	0.545284	0.5356	0.833317	0.9748	1.09798	1.13365	1.12909	4291.99	24.1747	3165.79	24.493
6353644	3	2017-07-20	2015-07-14	737	1	50	2019-02-18	1966-12-27	52	-1	67.7	161.5	25.9563	28.4912	1.17581	34.658	29.4758	1.1847	1.5378	7.47656	18.765	7.66533	48943.4	17.8802	7.2235	0.278294	0.725854	11.1304	46635.7	1910.08	2307.77	1.20821	1676.35	1699.43	1.01377	2.60272	0.812541	0.82495	0.623446	0.679931	0.876426	0.890767	1.27869	1.21524	1.25198	4253.81	23.9352	2729.66	29.5436
6353647	3	2017-09-26	2015-08-25	763	1	39	2019-02-18	1978-02-17	41	-1	80.7	172	27.2783	27.1135	1.26867	33.5363	26.4342	1.06573	1.27267	7.51587	20.2042	8.55992	59772	19.4059	8.15266	0.29887	0.884178	10.0992	57410.6	2152.97	2361.44	1.09683	1910.08	1816.83	0.951178	2.24219	0.810403	0.826522	0.602217	0.60726	0.957945	1.08547	1.07488	1.15124	1.13568	3992.16	24.0099	3790.57	29.4764
6353651	3	2017-05-11	2015-08-06	644	1	47	2019-02-18	1969-10-15	49	-1	75	171	25.6489	21.0362	1.10187	24.4323	22.1735	1.04251	1.16107	5.47945	20.5682	9.16363	60143.6	19.7342	8.75584	0.341373	0.998208	7.11158	57704.8	2130.67	2438.73	1.14458	1893.76	1852.24	0.978079	2.47548	0.80286	0.83185	0.67974	0.667932	0.965521	1.00228	1.20668	1.13318	1.06784	4008.02	23.7303	3384.42	22.0377
6353652	3	2017-07-10	2015-08-17	693	1	45	2019-02-18	1972-06-24	47	-1	73.5	173.5	24.4168	28.2967	1.37775	35.572	25.8188	1.33218	1.37625	6.92117	17.5381	7.83859	52793.7	16.8445	7.48134	0.306402	0.922338	12.453	50705.7	2047.06	2088	1.02	1807.75	1596.18	0.882967	2.05519	0.651597	0.711277	0.549542	0.518289	0.739847	0.887791	1.2105	1.0818	1.05713	3845.55	23.997	2791.9	33.6921
6353668	3	2017-07-18	2015-07-14	735	1	59	2019-02-18	1958-04-21	61	-1	62.7	170	21.6955	19.5606	1.04363	23.8391	22.8424	0.916474	0.87967	4.24328	17.4497	7.98929	50429.7	16.5906	7.54751	0.347884	1.00538	6.94485	47946.7	2129.88	2482.96	1.16578	1863.89	1808.14	0.970089	2.53705	0.764081	0.821379	0.536887	0.640171	0.802757	0.998981	1.21853	1.15872	1.14461	3970.83	23.1983	2973.35	23.9476
6353669	3	2017-08-04	2015-07-14	752	1	44	2019-02-18	1973-03-16	46	-1	72	164	26.7698	24.3703	1.33425	32.5155	24.37	1.16678	1.23688	6.54551	20.313	8.90436	54633.8	19.4338	8.42868	0.314858	0.846842	8.07698	52269.1	2152.97	2364.77	1.09838	1902.12	1854.43	0.974926	2.03443	0.758001	0.822439	0.629545	0.650017	0.930223	1.01872	1.16926	1.18147	1.16283	4098.43	24.226	3643.18	28.0958
6353681	3	2017-09-29	2015-06-30	822	1	49	2019-02-18	1968-04-24	51	0	58.4	168.5	20.569	21.7968	1.14569	23.9719	20.9236	1.12269	1.13753	4.53545	16.2725	7.26206	46201.2	15.5841	6.90631	0.335763	0.953308	9.1089	44246.8	1957.07	1954.4	0.998639	1705.81	1479.58	0.867373	1.88983	0.734454	0.702208	0.612875	0.548275	0.748536	0.879201	1.07622	1.00179	1.05348	3644.5	23.8795	2572.3	24.447
6353684	3	2017-09-29	2015-06-19	833	1	59	2019-02-18	1958-06-22	61	0	71.6	174	23.6491	24.7743	1.20725	31.1098	25.7691	1.08555	1.23295	5.91866	17.9717	7.76474	54411	17.1835	7.32221	0.309619	0.937403	10.4998	52024.8	2166.51	2386.29	1.10145	1921.63	1900.96	0.989245	1.9819	0.775458	0.781891	0.610391	0.596142	0.855986	0.956031	1.26555	1.16364	1.18817	3801.9	24.2008	3001.97	26.8177
6353689	3	2018-08-30	2015-08-20	1106	1		2019-02-18	1963-12-24	55	-1	88.7	180.5	27.2251	25.9786	1.15758	28.6912	24.7854	1.06226	1.25141	7.01695	19.9935	8.10481	65139.5	19.2599	7.72492	0.283743	0.924441	10.8908	62749.3	2255.84	2390.19	1.05955	1994.31	1924.53	0.965013	1.78046	0.768241	0.782041	0.537817	0.63158	0.858434	1.02624	1.3424	1.17615	1.15716	4623.22	24.47	4361.13	33.1078
6353692	3	2017-07-21	2015-07-09	743	1	54	2019-02-18	1963-03-11	56	-1	81.4	168.5	28.6698	25.5811	1.30152	31.6343	24.3057	1.22644	1.28657	7.33439	21.3368	9.61297	60579.9	20.5414	9.18521	0.320379	0.909629	8.43169	58321.7	2127.49	2258.12	1.0614	1883.8	1762.14	0.935416	2.03534	0.715175	0.784888	0.550246	0.587688	0.827055	1.02879	1.18993	1.13508	1.08873	3902.55	24.049	3552.72	29.219
6353693	3	2017-07-10	2015-06-18	753	1	60	2019-02-18	1957-06-29	62	0	65.9	164.5	24.3531	25.4243	1.21555	29.7928	24.5098	1.12831	1.37064	6.23217	18.2805	7.65254	49467.4	17.4086	7.23595	0.297127	0.804032	9.99875	47108.2	1983.75	2359.19	1.18926	1739.66	1760.68	1.01208	2.45204	0.827544	0.849248	0.641339	0.650426	0.920318	0.982369	1.2875	1.19827	1.17854	3985.58	23.5422	2927.69	24.6647
6353699	3	2017-05-09	2015-06-10	699	1	57	2019-02-18	1959-10-23	59	0	94.5	176	30.5075	33.9482	1.21037	40.6898	33.6175	1.07189	1.27083	10.3483	20.1343	8.6703	62367.9	19.3575	8.2713	0.271124	0.839832	13.3528	59961.9	2255.31	2406	1.06682	1996.49	1820.71	0.911958	2.26138	0.742255	0.750475	0.582072	0.560801	0.778379	0.931332	1.22307	1.09435	1.13978	4739.7	25.081	3284.5	34.0408
6353703	3	2017-06-13	2015-09-09	643	1	51	2019-02-18	1965-12-10	53	-1	65.5	170.5	22.5316	20.8678	1.09689	25.8049	23.5254	1.05645	1.07872	4.67655	17.7338	8.19669	51552.5	16.9536	7.75473	0.344171	1.00051	7.93315	49284.5	2045.46	2268.08	1.10884	1810.14	1778.7	0.982631	2.07961	0.773334	0.817044	0.557759	0.545715	0.843739	1.00663	1.07795	1.18406	1.22075	3671.12	23.897	3396.45	20.4504
6353720	3	2017-09-26	2015-08-20	768	1	50	2019-02-18	1967-04-29	52	-1	78	176	25.1808	20.8086	1.01167	22.7315	22.4692	0.977911	0.960806	4.60793	17.5364	8.15559	54320.9	16.7147	7.72523	0.306791	0.950315	8.12897	51775.4	2221.46	2545.49	1.14586	1953.88	2013.96	1.03075	1.98645	0.740745	0.822716	0.650365	0.567269	0.88165	1.11552	1.37734	1.19936	1.23843	3882.23	23.7436	3057.12	22.544
6353729	3	2017-07-03	2015-10-13	629	1	54	2019-02-18	1963-05-03	56	-1	71.1	172	24.0333	22.159	0.994246	23.9391	24.0777	0.856061	0.85772	5.36247	18.8375	8.56995	55729	17.9658	8.1146	0.337641	0.998876	7.40993	53150.1	2280.79	2578.82	1.13067	2039.09	2048.59	1.00466	2.1938	0.722652	0.796474	0.555231	0.540568	0.915195	1.20729	1.39058	1.1752	1.13939	3807.46	23.7404	3154.74	24.5093
6353764	3	2017-03-16	2015-09-22	541	1	53	2019-02-18	1964-01-14	55	-1	73.1	169	25.5943	22.091	1.06926	25.2524	23.6167	1.08324	1.19307	5.57756	19.6705	8.50026	56180.9	18.8745	8.06184	0.314985	0.899629	7.89535	53907.5	2129.48	2273.35	1.06756	1862.3	1781.06	0.956378	1.84253	0.776286	0.79258	0.527238	0.570495	0.840276	0.938061	1.12457	1.14217	1.18584	4379.2	24.5023	3418.52	24.2971
6353774	3	2017-06-06	2015-06-04	733	1	92	2019-02-18	1925-04-24	94	-1	65	169	22.7583	28.879	0.985923	30.9864	31.4288	0.947948	0.9667	6.68698	16.4682	7.40195	47034.8	15.7422	7.00533	0.307814	0.879148	11.5701	44961.3	2067.76	2073.47	1.00276	1836.42	1566.53	0.853036	2.19128	0.688763	0.733251	0.476715	0.49004	0.71751	0.850881	0.97447	1.05443	1.07258	3585.05	23.7234	2633.75	31.6383
6353775	3	2017-06-09	2015-06-04	736	1	95	2019-02-18	1921-08-16	98	-1	62.1	165	22.8099	27.0213	1.38133	33.6129	24.3337	1.24474	1.59681	6.09122	16.4511	6.25864	44788	15.6442	5.85945	0.256882	0.69936	13.2055	42591.3	1923.62	2196.73	1.14198	1678.74	1584.95	0.944129	2.49828	0.740307	0.808081	0.546448	0.656736	0.906216	0.957404	1.01407	1.24609	1.10916	4004.57	23.8043	2498.45	32.558
6353777	3	2017-06-09	2015-08-06	673	1	73	2019-02-18	1944-07-17	75	-1	71.7	163.5	26.8215	26.4023	1.403	32.9525	23.4871	1.20286	1.41583	7.11323	19.8285	8.33343	53005.9	18.8611	7.80952	0.291166	0.778352	9.53546	50419.9	2170.49	2586	1.19143	1945.92	2097.18	1.07773	2.17664	0.814559	0.816628	0.602071	0.667655	1.05592	1.14465	1.43881	1.27099	1.26359	3586.92	24	3107.01	29.7264
6353778	3	2017-06-07	2015-06-05	733	1	72	2019-02-18	1944-06-19	75	-1	74.6	164.5	27.5681	30.9919	1.2577	39.6837	31.5527	1.0359	1.20339	8.65904	19.2807	8.31399	52174	18.4691	7.86493	0.285291	0.772004	10.9834	49977.9	2038.3	2196.06	1.0774	1816.91	1733.14	0.953897	2.09097	0.75447	0.81491	0.59758	0.576152	0.93887	1.07778	1.15437	1.11122	1.11973	3799.67	24.2212	3137.79	32.3641
6353779	3	2017-06-05	2015-06-05	731	1	79	2019-02-18	1937-11-12	81	-1	76.8	163	28.9059	33.4172	1.06909	36.5777	34.2137	1.01021	1.20091	9.7352	19.3971	7.76292	51536.1	18.6717	7.41146	0.2564	0.681229	11.9874	49608.8	1892.16	1927.38	1.01861	1644.1	1440.84	0.876374	1.96131	0.671063	0.688948	0.59504	0.94998	0.760596	0.930941	1.17857	0.952109	0.996263	4419.21	25.0157	3170.51	39.8168
6353784	3	2017-06-08	2015-06-08	731	1	71	2019-02-18	1945-07-12	74	-1	66	168.5	23.2458	23.9107	1.14917	29.3708	25.5583	1.10656	1.17503	5.48282	17.4476	7.8226	49537.6	16.7843	7.48236	0.32188	0.913891	9.42347	47654.5	1958.26	1883.13	0.961635	1706.21	1423.93	0.834554	1.82189	0.739583	0.750099	0.542229	0.553904	0.750216	0.845453	0.998702	0.961727	0.951835	3902.77	24.1285	2735.83	24.6489
6353785	3	2017-06-08	2015-06-08	731	1	74	2019-02-18	1942-12-05	76	-1	63	161	24.3046	24.9613	1.08011	28.7059	26.5768	0.955225	1.08217	6.0241	18.1097	7.5576	46942.1	17.3035	7.12302	0.293073	0.759674	8.77119	44852.5	1873.45	2089.59	1.11537	1643.7	1574.42	0.957854	2.2423	0.816346	0.799827	0.548371	0.530957	0.85003	0.984322	1.11018	1.14368	1.15682	3678.74	23.813	3252.38	28.4547
6353786	3	2017-09-19	2015-06-08	834	1	63	2019-02-18	1953-07-01	66	-1	96.7	170	33.4602	30.5584	1.33278	36.912	27.6955	1.18629	1.63835	10.3244	23.4615	9.52861	67803.8	22.5662	9.06567	0.270939	0.783013	10.4665	65216.5	2240.17	2587.32	1.15496	2010.03	2096.55	1.04305	2.13237	0.812088	0.840681	0.620984	0.653587	1.00823	1.08432	1.35679	1.25992	1.2655	4067.89	24.826	4005.69	31.1906
6353788	3	2018-06-20	2015-06-09	1107	1	66	2019-02-18	1952-01-07	67	-1	66.6	169	23.3185	22.9621	1.41506	30.8367	21.7919	1.24867	1.46526	5.24577	17.5995	7.62231	50266	16.8897	7.24012	0.310488	0.886785	9.79611	48238.8	1877.76	2027.26	1.07961	1658.5	1576.83	0.950759	2.05427	0.752466	0.773523	0.664546	0.586563	0.875831	0.957982	1.1115	1.1314	1.15135	3636.74	24.2592	2814.27	21.7479
6353789	3	2018-06-22	2015-06-09	1109	1	64	2019-02-18	1953-08-26	66	-1	79.5	168	28.1675	23.7824	1.36456	31.3709	22.9898	1.131	1.46722	6.76857	21.6918	9.06165	61223	20.7783	8.59012	0.304966	0.860735	8.27101	58644.8	2167.35	2578.25	1.18959	1913.32	2043.58	1.06808	2.10476	0.817747	0.866876	0.713961	0.594283	1.00761	1.22085	1.43288	1.26398	1.20724	4287.31	24.12	3258.11	20.1932
6353791	3	2017-06-05	2015-06-09	727	1	65	2019-02-18	1952-02-05	67	-1	66.5	166.5	23.988	25.7039	1.49832	36.7752	24.5444	1.29015	1.48072	6.26028	18.0951	7.69333	50163.8	17.176	7.26684	0.302937	0.839809	10.6677	47615.7	2020.78	2548.08	1.26094	1766.34	1840.48	1.04198	2.78103	0.831193	0.832268	0.615083	0.639147	1.10621	1.24357	1.39137	1.18021	1.14785	4019.88	23.2246	3098.09	29.1675
6353792	3	2018-06-29	2015-06-09	1116	1	65	2019-02-18	1953-01-05	66	0	70.3	178	22.1879	20.3217	0.860951	21.1991	24.6229	0.895632	0.95136	4.50762	17.6737	7.90465	55997.3	16.8988	7.4888	0.337518	1.06939	8.07647	53542.3	2251.1	2454.99	1.09057	1995.1	1936.38	0.970567	2.02581	0.777655	0.824072	0.558078	0.59475	0.848378	1.24094	1.21695	1.13479	1.08209	4124.73	23.9551	3709.99	21.2983
6353793	3	2017-06-07	2015-06-09	729	1	83	2019-02-18	1934-01-15	85	-1	70.7	174.5	23.2182	33.0374	1.19775	40.5815	33.8815	0.955749	1.07802	7.84953	15.91	6.93325	48446.4	15.1818	6.53904	0.281634	0.857584	15.4827	46228.8	2155.36	2217.63	1.02889	1929.99	1726.27	0.894444	2.18023	0.710739	0.744113	0.517518	0.527878	0.876172	0.932895	1.11739	1.07933	1.02842	3625.23	23.8893	2972.71	33.429
6353794	3	2017-06-05	2015-06-09	727	1	69	2019-02-18	1948-04-16	71	-1	54.1	174	17.8689	18.2344	0.725789	16.0664	22.1365	0.816563	0.790633	3.32777	14.9222	6.87155	45178.5	14.0738	6.41129	0.358795	1.08629	7.57421	42609.9	2146.6	2568.54	1.19656	1908.49	1924.82	1.00855	2.70345	0.782397	0.80202	0.547589	0.559668	0.84568	0.929058	1.14309	1.2767	1.22732	3472.22	22.9096	2752.57	20.0604
6353796	3	2017-06-08	2015-06-08	731	1	93	2019-02-18	1923-11-02	95	0	66.8	164.5	24.6857	30.5447	1.06881	33.7413	31.5689	0.865112	1.02017	7.72192	17.5588	7.0185	47514.5	16.7563	6.60762	0.26767	0.724323	11.7218	45343	2049.84	2171.47	1.05934	1844.38	1799.74	0.975797	1.80925	0.748886	0.738195	0.582987	1.06536	1.06412	1.26088	1.15391	1.04347	1.08771	3935.19	25.8493	2522.75	37.4917
6353798	3	2017-06-08	2015-06-08	731	1	87	2019-02-18	1930-03-18	89	-1	74	171	25.3069	29.3249	0.951515	29.9203	31.4449	0.791694	1.10604	7.44171	17.935	6.61959	52443.8	17.1957	6.2239	0.245937	0.719143	12.6572	50282	2066.97	2161.82	1.04589	1849.96	1704.13	0.921174	2.10908	0.748277	0.771616	0.608189	0.579383	0.859775	1.13928	1.07457	1.10098	1.14222	3883.2	24.4189	2787.09	33.2055
6357817	3	2018-07-03	2016-05-19	775	1	60	2019-02-18	1958-06-11	61	0	74.5	174	24.6069	24.8956	0.910052	26.962	29.6269	1.14256	1.36825	6.12986	18.4924	7.96133	55987.5	17.6997	7.55856	0.307172	0.929994	10.6152	53587.5	2175.64	2400.05	1.10315	1904.63	1844.8	0.968591	2.04876	0.744762	0.823092	0.610589	0.623769	0.832801	0.943991	1.28157	1.13043	1.14525	4389.24	24.1766	2955.92	23.3938
6375164	3	2018-07-25	2016-05-23	793	1	48	2019-02-18	1969-11-19	49	-1	83.8	171.5	28.4915	26.4725	1.27948	31.2214	24.4017	1.20763	1.47931	7.53676	20.9334	9.09704	61569.9	20.1834	8.69903	0.30532	0.898015	9.7739	59364	2159.45	2205.9	1.02151	1912.53	1760.36	0.920435	1.8044	0.769583	0.778553	0.5943	0.542146	0.844624	0.924451	1.1265	1.09106	1.13476	4447.48	24.8828	3435.51	24.1691
6399232	3	2017-10-12	2015-10-26	717	1	48	2019-02-18	1969-02-25	50	-1	75	180.5	23.0201	21.0097	0.928305	21.5388	23.2023	0.844108	0.886192	4.88606	18.3702	8.32495	59850.5	17.5593	7.88739	0.342631	1.1163	8.01631	57208.7	2437.67	2641.76	1.08372	2165.32	2038.39	0.941382	2.21537	0.724379	0.760547	0.599465	0.563975	0.819795	0.946429	1.17046	1.14815	1.11046	4264.01	23.7845	3626.45	20.9009
6442334	3	2018-07-12	2016-09-28	652	1	55	2019-02-18	1962-12-09	56	-1	93.1	178.5	29.2195	24.8159	1.38392	33.2434	24.0212	1.13721	1.4408	7.26816	22.0201	9.28082	70161.1	21.1541	8.82255	0.30194	0.96205	9.48283	67401.7	2420.19	2759.34	1.14013	2152.73	2180.33	1.01282	2.16483	0.797837	0.831293	0.662476	0.600039	1.02725	1.09604	1.27134	1.22685	1.19969	4671.64	24.2007	4068.36	25.0927
6464771	3	2017-12-09	2016-06-04	553	1	5	2019-02-18	2012-06-04	7	-1	15.5	106	13.7949	22.8157	0.765894	20.8031	27.1618	0.79478	0.724525	3.13731	10.6134	4.25028	11925.2	10.1049	4.05812	0.294174	0.330534	5.37795	11353.8	946.48	571.379	0.603689	737.036	341.794	0.463742	1.09616	0.359105	0.361775	0.38389	0.402103	0.420299	0.55625	0.581713	0.496424	0.486447	2308.4	24.4572	593.389	25.5503
6553651	3	2018-05-10	2016-05-19	721	1	45	2019-02-18	1972-07-16	47	0	71.6	169	25.0692	23.6588	1.34351	30.0291	22.3511	1.18765	1.23951	5.95179	19.205	8.77151	54851.4	18.3017	8.28573	0.330515	0.943983	8.6798	52271.5	2194.21	2579.9	1.17577	1962.7	2021.85	1.03014	2.41044	0.834354	0.826693	0.623904	0.624611	0.84287	1.07191	1.33867	1.27838	1.18782	3743.51	23.5822	3191.96	23.9112
6574450	3	2018-05-29	2016-04-29	760	1	52	2019-02-18	1966-11-01	52	0	76.7	176	24.7611	23.6877	1.32087	30.4808	23.0763	1.1121	1.31688	5.88997	18.9751	8.18269	58777.2	18.1402	7.76346	0.313534	0.971204	9.9241	56191.2	2251.1	2586.01	1.14877	1988.38	1961.7	0.986581	2.37632	0.809847	0.832321	0.67806	0.60599	0.90037	1.10824	1.19037	1.14042	1.16833	4550.4	23.8183	3264.15	23.272
6634263	3	2018-04-26	2016-09-08	595	1	45	2019-02-18	1973-03-23	46	-1	73.2	174	24.1776	24.6554	0.973451	26.6817	27.4093	0.906558	1.03907	5.96854	18.2393	8.12614	55221.4	17.5441	7.74484	0.320332	0.969836	9.48728	53116.6	2125.86	2104.77	0.990076	1878.55	1689.32	0.899267	1.67984	0.767969	0.779815	0.53642	0.535678	0.743632	0.866551	1.08216	1.07523	1.12269	3872.32	24.4036	3329.72	20.696
6636106	3	2018-10-16	2015-10-14	1098	1	41	2019-02-18	1977-01-26	42	-1	66	172	22.3094	17.605	1.06415	19.1659	18.0105	1.06948	1.01886	3.94927	18.4834	8.8015	54681.2	17.7299	8.3833	0.375775	1.11169	6.18679	52452.2	2104.53	2229.03	1.05916	1859.59	1829.01	0.983554	1.63314	0.776956	0.850842	0.628513	0.635177	0.808893	0.951541	1.15152	1.14346	1.17892	3756.4	24.2172	3274.08	17.4655
6637015	3	2017-11-17	2015-11-05	743	2	47	2019-02-18	1970-07-30	49	-1	71.1	170	24.6021	31.9399	0.948318	32.8923	34.6849	0.909264	0.870535	7.90049	16.835	7.60167	48653.1	15.8534	7.12275	0.289518	0.836708	12.4453	45816.3	2209.12	2836.86	1.28416	1955.87	2154.3	1.10145	2.69528	0.785941	0.801112	0.659188	0.618529	1.1183	1.45089	1.52622	1.24532	1.25079	3911.25	23.2158	2496.79	38.5551
6637016	3	2017-12-06	2015-11-03	764	2	49	2019-02-18	1968-03-21	51	-1	64.1	154.5	26.8535	31.8233	1.08817	32.4366	29.8083	1.22575	1.42352	8.49175	18.1923	7.41949	43425.6	17.3392	7.06058	0.262929	0.627619	11.4083	41389	1775.1	2036.57	1.1473	1532.21	1434.75	0.936392	2.47777	0.682125	0.703659	0.660515	0.624753	0.915613	1.23716	1.36722	1.02569	1.07994	3629.09	23.5737	2165.8	39.7256
6637017	3	2017-11-20	2015-11-17	734	2	50	2019-02-18	1967-05-01	52	0	57.9	158	23.1934	28.0666	1.14564	31.9711	27.9067	1.19445	1.44196	6.68878	17.143	7.15992	42795.8	16.1899	6.71101	0.28935	0.722333	11.2111	40416.4	1922.82	2379.36	1.23743	1691.48	1787.65	1.05686	2.55767	0.830636	0.846441	0.682301	0.717402	1.03791	1.2288	1.46604	1.19115	1.21134	3532.3	23.2686	2349.8	30.2321
6637018	3	2017-11-14	2015-11-05	740	2	51	2019-02-18	1966-08-20	53	51	61	159	24.1288	35.7002	1.18511	41.5296	35.0428	0.993061	1.05037	8.91041	16.0486	6.67953	40572.3	15.1699	6.26602	0.259691	0.656524	14.3437	38351.1	1925.61	2221.23	1.15352	1670.38	1533.42	0.918007	2.69484	0.71015	0.713399	0.604092	0.564775	0.845325	0.949762	1.22141	1.1191	1.10855	3836.91	23.1083	1998.87	44.7818
6637038	3	2017-09-25	2015-10-22	704	1	46	2019-02-18	1971-12-09	47	-1	79.1	176.5	25.3914	23.6976	1.16507	29.5329	25.3485	0.947847	1.24598	6.05674	19.5018	7.9133	60752.4	18.6403	7.50447	0.295551	0.920708	9.73634	58068.6	2278.4	2683.77	1.17792	2001.27	2000.88	0.999808	2.46408	0.802714	0.807928	0.724644	0.696359	0.956886	1.09819	1.23492	1.16421	1.12212	4336.35	23.3851	3203.57	23.578
6637039	3	2017-04-11	2015-10-21	538	1	62	2019-02-18	1954-08-19	65	-1	73.1	169.5	25.4436	24.0275	1.09754	27.0132	24.6125	0.956504	1.09536	6.107	19.3098	8.25047	55477.4	18.4516	7.83145	0.307797	0.884309	8.66561	53011.9	2148.59	2465.54	1.14751	1881.41	1753.54	0.932035	2.66486	0.793706	0.787536	0.714648	0.68557	0.78068	0.869195	1.22822	1.06661	1.04494	4362.19	23.3502	3290.92	24.7076
6658743	3	2018-06-21	2016-06-29	722	1	73	2019-02-18	1945-03-10	74	-1	66.6	170.5	22.91	24.1656	1.28233	31.2685	24.3841	1.16783	1.45604	5.59387	17.5542	7.30672	51030.6	16.6728	6.85604	0.299259	0.869955	10.928	48468.1	2140.09	2562.43	1.19735	1886.06	1915.04	1.01537	2.5485	0.793144	0.810645	0.62028	0.64586	0.987712	1.10724	1.17942	1.23633	1.24245	4282.72	23.5917	2954.56	23.1612
6658749	3	2018-06-21	2016-06-29	722	1	83	2019-02-18	1934-12-01	84	-1	51.8	162	19.7378	21.6451	0.708948	19.3005	27.2242	0.788897	0.930591	4.3379	15.7032	6.43381	41211.3	14.9388	6.05685	0.306865	0.805336	8.33854	39205.3	1909.76	2006.07	1.05043	1676.67	1492.26	0.890011	2.20437	0.719265	0.729104	0.512249	0.603148	0.886195	1.10928	1.09002	1.01759	1.06519	3469	23.62	2428.9	25.2578
6658756	3	2018-06-25	2016-06-28	727	1	91	2019-02-18	1927-03-24	92	-1	72.1	163.5	26.9712	27.5591	1.1294	31.6671	28.0388	0.942826	1.12777	7.46158	19.6133	8.21157	52430.8	18.8444	7.8065	0.289439	0.773735	9.31066	50375.3	1971	2055.45	1.04285	1733.17	1501.73	0.866464	2.32821	0.698135	0.701949	0.56997	0.567288	0.785708	0.809777	0.966691	1.05134	1.07147	3880.38	23.7124	2641.59	29.059
6658774	3	2018-10-30	2016-09-02	788	1	46	2019-02-18	1972-10-30	46	-1	73.9	172	24.9797	21.6896	1.19038	28.5047	23.9459	1.04755	1.18678	5.45727	19.7035	8.57744	58290.7	18.8453	8.09389	0.324018	0.958576	8.01034	55752	2207.64	2538.66	1.14994	1968.63	2054.1	1.04342	2.02728	0.83089	0.816034	0.652574	0.580755	0.899671	1.03093	1.34759	1.21241	1.25785	4481.32	24.3191	3000.12	21.9341
6658776	3	2018-07-04	2016-06-17	747	1	55	2019-02-18	1963-04-10	56	0	76.7	174	25.3336	24.1041	1.21938	28.1961	23.1232	0.993537	1.08384	6.12994	19.3011	8.44352	58436.1	18.5976	8.05777	0.318067	0.962979	8.94695	56306.2	2091.49	2129.91	1.01837	1845.37	1620.93	0.878379	2.06796	0.692392	0.726815	0.543596	0.518428	0.755021	0.822469	1.06395	1.08658	1.05062	4213.75	24.0998	3204.66	27.1582
6658801	3	2018-11-09	2016-08-05	826	1	55	2019-02-18	1963-06-11	56	0	71.8	161.5	27.5283	30.4367	1.1998	37.6571	31.3861	0.90621	0.986069	8.34341	19.069	8.26071	49736.2	18.3535	7.88717	0.286511	0.747286	9.75879	47870.1	1862.75	1866.03	1.00176	1637.56	1448.66	0.884647	1.8534	0.660652	0.68687	0.534974	0.576888	0.962553	0.909972	1.10344	1.03893	1.04075	3898.17	24.6928	2847.08	33.3498
6658819	3	2018-05-10	2016-05-16	724	1	49	2019-02-18	1969-04-04	50	-1	83.4	177.5	26.4709	22.2309	1.18793	28.8638	24.2976	1.03485	1.17345	5.94428	20.7945	9.36608	65515.7	19.8706	8.87356	0.335219	1.05615	8.0999	62604.7	2359.35	2910.94	1.23379	2095.05	2304.71	1.10008	2.29371	0.914202	0.922334	0.577633	0.61183	0.941638	1.07661	1.42872	1.31272	1.28918	4117.27	23.5924	4469.42	21.482
6658865	3	2018-07-18	2016-07-01	747	1	55	2019-02-18	1963-03-23	56	-1	76.6	176.5	24.5889	24.4877	0.939989	27.3246	29.069	0.844839	0.926672	6.04976	18.6555	8.33613	58116.2	17.9295	7.95256	0.32342	1.00753	9.03482	55854.5	2188.68	2261.75	1.03338	1955.59	1834.06	0.937857	1.83484	0.761395	0.771125	0.562388	0.582645	0.94221	1.0882	1.17168	1.05164	1.08202	3957.99	24.383	3899.88	24.6366
6658867	3	2018-08-17	2016-06-15	793	1	40	2019-02-18	1977-11-23	41	-1	62.1	175.5	20.1622	18.5398	0.866033	18.5516	21.4214	0.862613	0.916688	3.72243	16.3556	7.47579	50375.6	15.6916	7.09654	0.351973	1.08409	7.44151	48330.5	2105.72	2045.06	0.971195	1874.21	1726.95	0.921429	1.37408	0.791035	0.786292	0.602418	0.604373	0.878034	1.04104	1.09738	1.02672	1.069	3364.85	24.4214	3051.54	18.2501
6659012	3	2017-09-18	2015-10-27	692	1	52	2019-02-18	1965-06-09	54	0	64.6	170	22.3529	26.0592	0.875418	25.542	29.1769	0.839902	0.857559	5.84539	16.5858	7.39387	47932.9	15.7738	6.97497	0.312038	0.90179	10.0076	45586.3	2138.64	2346.68	1.09728	1879.42	1766.33	0.939825	2.23887	0.746885	0.736193	0.560723	0.587357	0.782638	1.02588	1.11565	1.15477	1.14947	3724.43	23.4072	2510.1	27.832
6659063	3	2018-07-03	2016-03-22	833	1	45	2019-02-18	1972-10-16	46	-1	66	164	24.539	22.7276	1.20505	29.17	24.2065	0.992074	1.03841	5.73032	19.4828	8.46267	52400.8	18.6691	8.05159	0.328114	0.882496	7.37319	50212.4	2003	2188.48	1.0926	1727.64	1584.31	0.917037	2.19411	0.74236	0.759764	0.579491	0.549807	0.87884	0.852094	1.09012	1.09098	1.09509	4518.03	24.2261	3617.89	26.9212
6659086	3	2017-10-16	2015-10-30	717	1	58	2019-02-18	1959-07-24	60	0	75.5	180.5	23.1735	21.5687	0.995885	24.5673	24.6688	0.994412	0.917125	4.98747	18.1362	8.76988	59088.3	17.3919	8.33492	0.359674	1.17183	8.30773	56663.2	2281.59	2425.12	1.06291	2044.67	1954.36	0.955835	1.98699	0.799765	0.815451	0.567391	0.547137	0.808292	0.974424	1.0712	1.11436	1.15891	3923.31	24.1079	3579.82	22.2314
6659099	3	2018-11-07	2015-11-12	1091	1	51	2019-02-18	1967-10-02	51	-1	90.2	171.5	30.6675	27.4757	1.23825	32.5768	26.3088	1.19431	1.43156	8.45697	22.3228	9.47421	65656.4	21.5777	9.06792	0.295685	0.869676	9.46481	63464.8	2183.15	2191.59	1.00386	1964.28	1781.01	0.906696	1.87593	0.777843	0.801985	0.586649	0.616263	0.832717	0.850682	1.06317	1.07054	1.11517	4318.39	25.1094	4156.96	30.3272
6659179	3	2018-05-14	2016-03-15	790	1	52	2019-02-18	1965-07-07	54	-1	70.7	170	24.4637	21.5486	1.13771	25.9042	22.7687	1.09473	1.21771	5.2685	19.1808	8.56424	55432.6	18.4217	8.17401	0.334128	0.965631	7.8859	53238.7	2001.42	2193.94	1.09619	1755.29	1694.13	0.965156	2.03071	0.782662	0.823036	0.643046	0.662367	0.91872	0.980427	1.11115	1.11626	1.11163	3941.39	24.0117	3291.17	19.6667
6659414	3	2017-08-29	2015-10-29	670	1	51	2019-02-18	1965-10-03	53	-1	56.1	165	20.6061	21.8553	1.15056	27.9599	24.3011	0.971239	0.995786	4.50256	16.0992	7.12654	43830	15.2467	6.66145	0.323276	0.88012	8.62819	41509.1	2016	2320.92	1.15125	1764.74	1757.13	0.995682	2.24394	0.796182	0.830866	0.571316	0.574933	0.941228	0.91958	1.12954	1.22136	1.1997	3669.8	23.4532	2412.64	25.6268
6659415	3	2017-09-08	2015-09-24	715	1	46	2019-02-18	1971-04-10	48	-1	80.1	175	26.1551	22.3362	1.08404	24.8334	22.9081	1.30266	1.37898	5.84808	20.334	9.40646	62273	19.5159	8.95127	0.342238	1.0481	8.41122	59767.6	2305.08	2505.38	1.0869	2082.1	2099.14	1.00819	1.82187	0.731836	0.755127	0.613917	0.674949	0.849081	1.01185	1.3211	1.20424	1.18433	3809.48	24.4254	3570.03	22.1032
6659488	3	2017-09-27	2015-10-22	706	1	53	2019-02-18	1964-02-15	55	-1	58.3	176.5	18.7145	21.1599	1.19384	25.8958	21.6912	1.04251	1.12595	3.99268	14.8764	6.74168	46343.3	14.2398	6.38412	0.341131	1.0627	10.4936	44360.3	1985.34	1982.97	0.998806	1753.99	1576.39	0.898745	1.75744	0.76225	0.805888	0.564281	0.489492	0.744567	0.800425	1.11876	1.05181	1.05165	3345.57	24.0614	2694.77	20.7933
6659489	3	2017-09-15	2015-10-21	695	1	58	2019-02-18	1959-06-06	60	-1	69	165.5	25.1914	23.5014	1.55818	31.693	20.3398	1.34734	1.81481	5.97417	19.4463	7.90871	53264	18.5759	7.45612	0.295978	0.810692	9.58146	50879.9	2041.48	2384.09	1.16782	1788.64	1853.88	1.03648	2.09694	0.823021	0.9091	0.601339	0.656859	0.909508	1.03802	1.29408	1.23751	1.23604	4034.58	24.0281	2863.33	23.4322
6659492	3	2017-09-28	2015-09-28	731	1	44	2019-02-18	1973-01-18	46	-1	67.9	163	25.5561	22.5068	0.951287	23.9979	25.2268	0.984627	1.02102	5.74765	19.7897	8.96338	52579.4	18.9293	8.51369	0.333137	0.885112	6.91513	50293.2	1993.3	2286.13	1.1469	1750.01	1789.46	1.02254	2.04148	0.790187	0.769413	0.691694	0.609645	0.961034	1.11888	1.27577	1.2373	1.19056	3746.68	23.8615	3062.11	23.41
6659498	3	2017-09-11	2015-09-23	719	1	56	2019-02-18	1961-05-02	58	-1	69.9	174.5	22.9555	24.9475	1.12112	28.9774	25.8468	1.09171	1.18672	5.71278	17.1864	7.71944	52333.1	16.4191	7.3359	0.319571	0.973102	10.7805	49996.6	2151.78	2336.5	1.08585	1917.65	1828.7	0.953617	2.16886	0.690323	0.787884	0.594337	0.645031	0.973702	1.15927	1.26413	1.06742	1.05274	3718.13	23.8315	3127.57	26.9842
6659843	3	2018-09-25	2016-09-26	729	1	56	2019-02-18	1962-08-04	57	-1	64.5	163.5	24.1282	25.4245	1.21856	30.0791	24.6841	1.15455	1.39933	6.09466	17.8769	7.47003	47789.1	17.195	7.09954	0.294243	0.786578	10.0969	45966.2	1859.98	1822.91	0.98007	1634.4	1445.56	0.884457	1.67281	0.71867	0.763574	0.572136	0.528134	0.7948	0.860484	1.04039	1.08929	1.09675	3972.17	24.8011	2387.92	28.1313
6659844	3	2018-10-17	2016-09-14	763	1	45	2019-02-18	1973-01-30	46	-1	69.9	172.5	23.4909	22.777	1.10548	26.015	23.5329	1.02859	1.09502	5.34653	18.1268	8.12839	53938.7	17.4076	7.71465	0.32841	0.977226	8.80518	51798.5	2065.42	2140.22	1.03621	1837.86	1683.83	0.916189	2.00558	0.729564	0.747531	0.592667	0.521081	0.78988	0.764415	0.886846	1.17549	1.16977	3730.87	24.0689	2692.02	25.097
6659884	3	2018-09-25	2016-09-22	733	1	56	2019-02-18	1962-06-04	57	0	93.1	159.5	36.5956	30.5966	1.19992	35.2102	29.3439	0.948025	1.16156	11.1177	25.2186	10.5753	64156.7	24.5528	10.1899	0.278448	0.708378	7.59302	62462.9	1940.97	1693.75	0.872631	1718.94	1435.37	0.835031	1.16373	0.706366	0.683886	0.566144	0.472986	0.75868	0.803301	1.01345	1.03917	1.0396	4400.46	26.2199	3638.59	31.3457
6659885	3	2018-10-08	2016-09-19	749	1	51	2019-02-18	1967-08-15	52	0	66.5	173.5	22.0914	17.3902	1.02909	19.8717	19.31	0.991732	1.03273	3.89652	18.5099	8.61264	55719.1	17.6347	8.1298	0.368008	1.10779	6.31268	53084.3	2196.19	2634.79	1.19971	1967.44	2192.32	1.1143	1.9343	0.883272	0.885366	0.647238	0.731438	1.08921	1.16837	1.33943	1.31501	1.29146	3704.18	24.0868	3592.57	15.7688
6659890	3	2018-09-04	2016-09-07	727	1	52	2019-02-18	1966-02-21	53	0	77.2	168	27.3526	21.5091	1.12265	25.1802	22.4293	1.03598	1.14994	5.91038	21.5681	9.49764	60873.7	20.6792	9.00258	0.32913	0.928938	6.72625	58364.8	2176.83	2508.87	1.15254	1947.69	2141.15	1.09933	1.60481	0.817841	0.854763	0.749785	0.774165	1.0053	1.25154	1.39132	1.27691	1.25315	3966.15	24.8168	3127.25	24.0517
6659893	3	2018-08-23	2016-09-01	721	1	59	2019-02-18	1959-07-31	60	0	59.3	165	21.7815	24.4402	1.11997	27.8605	24.8762	1.03776	1.14466	5.37433	16.6154	7.16979	45235.4	15.8389	6.75168	0.309974	0.843903	9.98105	43121.4	1897.12	2113.93	1.11428	1641.51	1598.56	0.973833	2.01624	0.85488	0.887877	0.582093	0.517813	0.784157	0.888098	1.14533	1.13448	1.20518	4016.09	23.8476	2750.88	26.8388
6659895	3	2018-10-09	2016-08-30	770	1	55	2019-02-18	1963-06-28	56	-1	86.9	173.5	28.8683	24.0381	1.10903	26.136	23.5665	0.93325	1.11404	6.93847	21.926	9.23883	66002	21.145	8.8039	0.304968	0.918022	7.92765	63651.2	2174.85	2350.84	1.08092	1947.29	2002.23	1.02821	1.53197	0.79999	0.822618	0.597467	0.575346	0.995351	1.0287	1.35987	1.18132	1.22409	4067.26	24.7917	4231.3	25.6155
6659896	3	2018-05-03	2016-09-01	609	1	49	2019-02-18	1968-08-04	51	-1	76.4	168	27.0692	21.0529	1.38727	28.2631	20.3732	1.17608	1.23901	5.69535	21.3572	9.81834	60278.6	20.4303	9.32835	0.344612	0.972632	6.73793	57662.6	2152.33	2616	1.21543	1928.73	2118.41	1.09835	2.22528	0.893694	0.949655	0.783522	0.730805	1.10487	1.24578	1.34065	1.26737	1.2082	3922.2	24.0819	3992.41	20.4993
6660491	3	2018-10-19	2017-09-22	392	1	47	2019-02-18	1971-05-25	48	-1	77.4	178.5	24.2921	20.9809	1.28855	24.9927	19.396	1.07013	1.22623	5.14924	19.3932	8.45157	61791.2	18.588	7.99603	0.329162	1.04878	8.45703	59225.4	2324.98	2565.82	1.10359	2083.99	2181.01	1.04655	1.59678	0.880957	0.892967	0.678987	0.646886	0.821417	0.979681	1.36797	1.28304	1.19694	3923.67	24.5072	3487.48	23.4648
6742895	3	2018-05-23	2016-03-24	790	1	53	2019-02-18	1964-07-05	55	0	102.3	181.5	31.0543	29.338	1.05322	32.6799	31.0285	0.953833	1.04649	9.06752	21.8395	9.58864	71944.3	20.9185	9.09405	0.292843	0.964691	10.4813	68910.4	2544.64	3033.89	1.19227	2287.45	2479.46	1.08394	2.15573	0.815561	0.90008	0.782937	0.701262	1.10774	1.28517	1.45258	1.18898	1.1902	4831.89	24.6932	3717.68	31.8725
6925850	3	2018-09-26	2016-10-09	717	1	40	2019-02-18	1978-09-15	40	0	86.5	170.5	29.7555	23.6101	1.32097	26.7877	20.2788	1.27792	1.36076	7.0607	22.8447	10.2649	66410.2	22.0243	9.81507	0.329857	0.958903	7.51004	64025.2	2172.88	2385	1.09762	1940.58	2038.44	1.05043	1.49186	0.804527	0.83496	0.668274	0.673317	0.888614	1.04526	1.33346	1.2453	1.26507	4044.64	25.1265	3787.22	27.3338
6925861	3	2018-10-31	2016-10-26	735	1	54	2019-02-18	1964-02-19	55	0	74.7	170.5	25.6964	23.76	1.31822	31.0327	23.5413	1.23929	1.15511	6.10997	19.6054	8.99441	56993.3	18.8476	8.53133	0.332005	0.965147	8.38718	54790.4	2048.43	2202.87	1.07539	1820.87	1932.29	1.06119	1.18908	0.753753	0.865722	0.565599	0.567946	0.975152	1.04521	1.42172	1.25323	1.27914	3786.16	25.2305	3481.42	30.9188
7020565	3	2017-09-19	2015-10-12	708	1	51	2019-02-18	1966-02-18	53	-1	88	177.5	27.931	26.743	1.53424	36.2016	23.5957	1.42156	1.63364	7.49551	20.5324	9.26742	64690	19.7146	8.82876	0.316092	0.995888	10.9213	62113.3	2295.92	2576.68	1.12229	2027.15	2065.15	1.01875	1.90321	0.785887	0.818374	0.575464	0.593623	0.830741	1.04968	1.50683	1.18598	1.24444	4158.65	24.357	3925.01	26.0642
7020732	3	2017-03-06	2015-05-29	647	1	60	2019-02-18	1957-02-01	62	0	76.2	171	26.0593	19.8999	1.35698	24.25	17.8705	1.29804	1.45548	5.13729	20.6783	9.07406	60465.5	19.7452	8.63188	0.33124	0.968579	7.29553	57737	2241.37	2728.47	1.21732	1965.43	2013.64	1.02453	2.59051	0.807967	0.860855	0.68753	0.612826	0.981474	1.06029	1.33171	1.18981	1.21246	4410.34	23.4602	3521.1	19.7786
7034116	3	2017-11-24	2015-11-06	749	2	61	2019-02-18	1956-04-27	63	51	54	163	20.3244	31.762	0.734913	30.2774	41.1986	0.786275	0.744722	6.47496	13.9109	6.2826	36960	13.2723	5.98132	0.294292	0.781904	12.8723	35263.2	1851.55	1696.72	0.916381	1597.51	1174.86	0.735436	2.05424	0.595829	0.580043	0.469503	0.487401	0.690947	0.909033	1.00151	0.868415	0.803036	3342.88	23.4587	2067.36	32.3497
7034832	3	2018-04-04	2014-10-22	1260	1	6	2019-02-18	2011-11-30	7	-1	20	116.3	14.7867	16.5689	0.745891	15.5998	20.9143	0.803133	0.819831	2.48747	12.5254	5.14441	16941.5	11.9756	4.94292	0.334282	0.45214	3.66347	16197.8	1076.56	743.708	0.690817	849.003	446.72	0.526171	1.3051	0.444823	0.433217	0.441775	0.412126	0.5061	0.62646	0.636383	0.568446	0.552921	2699.99	24.2726	875.103	15.3571
7040114	3	2018-03-27	2016-08-15	589	1	49	2019-02-18	1968-10-05	50	-1	65	172.5	21.8442	21.9749	1.27278	28.9819	22.7706	1.15522	1.17975	4.81702	17.1035	7.6477	50893.7	16.2984	7.2358	0.331247	0.985666	9.39914	48497.8	2192.63	2395.89	1.0927	1924.38	1728.54	0.898231	2.48779	0.746926	0.788918	0.518473	0.581645	0.781667	0.880144	1.06294	1.06367	1.04369	4490.51	23.6293	3546.51	23.9275
7041233	3	2018-10-25	2016-08-25	791	1	56	2019-02-18	1962-10-05	56	-1	63.9	172	21.5995	19.9838	1.14218	27.1765	23.7934	1.03224	0.970572	4.32257	17.3078	8.03279	51203.3	16.5614	7.61689	0.352642	1.04326	7.56211	48995.2	2157.87	2208.14	1.0233	1900.28	1805.09	0.949906	1.56475	0.778082	0.786137	0.555078	0.547628	0.910695	1.00579	1.19903	1.10681	1.11511	4102.45	24.5176	3251.77	22.4218
7043309	3	2017-09-04	2015-09-14	721	1	52	2019-02-18	1965-08-23	54	-1	82.4	175.5	26.753	26.0554	1.40627	32.4488	23.0744	1.31153	1.52882	6.913	19.619	8.47161	60426.9	18.7856	8.00648	0.299274	0.921771	10.9693	57860.2	2280.79	2566.75	1.12538	2042.68	2065.67	1.01126	2.10436	0.787184	0.785931	0.564937	0.585954	0.929537	0.990885	1.20541	1.27301	1.28464	4017.83	24.2997	3938.06	27.6033
7051699	3	2017-06-06	2015-06-05	732	1	87	2019-02-18	1930-01-01	89	-1	64.5	166.5	23.2665	32.6995	1.20549	37.4124	31.035	1.08219	1.3825	7.67489	15.7961	6.27711	43790.2	15.0304	5.92628	0.254713	0.706122	15.9584	41667.6	1962.64	2122.64	1.08152	1726.12	1521.24	0.881306	2.54268	0.655304	0.683665	0.577309	0.539713	0.798496	1.06256	1.11845	0.995409	1.13124	3913.4	23.7856	2365.49	35.6891
7081888	3	2018-07-27	2015-07-17	1106	1	51	2019-02-18	1966-10-21	52	0	66.4	159.5	26.1004	23.5701	1.05445	25.6438	24.3198	0.999247	1.15558	6.18381	20.052	8.31133	51012.7	19.0687	7.83036	0.300009	0.763232	7.50721	48511.2	1987.59	2501.42	1.25852	1753.71	1854.18	1.05729	2.76738	0.828741	0.896126	0.639343	0.629993	0.95064	1.2018	1.40087	1.27045	1.21899	3925.05	23.252	2803.66	27.7826
7108452	3	2017-06-01	2015-05-22	741	1	52	2019-02-18	1964-12-14	54	-1	67.1	165	24.6465	25.3403	1.08471	28.2085	26.0055	0.994176	1.20554	6.23906	18.382	7.7038	50045	17.6082	7.31699	0.296878	0.808249	9.46396	47938.4	2047.06	2106.59	1.02908	1804.96	1551.91	0.859804	2.29116	0.687853	0.727463	0.634965	0.577934	0.697993	0.805218	1.03649	1.03009	1.02018	3666.26	23.5784	2421.18	25.9495
7119707	3	2018-07-10	2016-10-13	635	1	52	2019-02-18	1966-04-29	53	0	68	172	22.9854	22.1866	1.14156	26.274	23.0159	1.07212	1.16565	5.03943	17.6744	7.6905	52287.9	16.9714	7.33016	0.318905	0.943449	9.03726	50208.1	2092.68	2079.74	0.993819	1829.56	1503.77	0.82193	2.18904	0.703276	0.723665	0.530764	0.496589	0.655306	0.694392	0.945972	0.98497	1.01595	4148.83	23.8528	2796.59	24.57
7125210	3	2017-05-05	2015-05-06	730	1	49	2019-02-18	1968-01-05	51	-1	79	178.8	24.7111	22.4414	1.14362	27.5728	24.1102	1.06747	1.09346	5.56363	19.2282	9.05286	61471.5	18.2965	8.53877	0.345544	1.10468	8.71653	58492.9	2441.66	2978.62	1.21992	2191.6	2384.07	1.08782	2.37768	0.824831	0.861317	0.602724	0.696992	0.840638	1.13485	1.41911	1.31057	1.27909	4117.99	23.7085	3742.59	20.9108
7126799	3	2017-06-08	2015-06-08	731	1	79	2019-02-18	1937-06-16	82	-1	59.1	153.5	25.0825	22.0202	1.28292	30.3112	23.6266	1.01904	1.16775	5.63017	19.938	8.38533	46978.4	19.1587	8.02237	0.31984	0.753614	6.39867	45142.3	1720.94	1836.12	1.06693	1474.87	1288.59	0.873697	2.22505	0.749993	0.747569	0.517551	0.516319	0.794044	0.979458	1.05118	1.02851	1.03006	3933.49	23.7441	2767.37	24.4435
7128684	3	2017-11-21	2015-11-03	749	1	48	2019-02-18	1969-06-11	50	-1	89.6	179.5	27.8086	27.1559	1.06955	30.631	28.6392	0.982732	1.08334	7.56994	20.3059	9.14575	65426	19.4967	8.71049	0.31323	1.00924	10.1687	62819	2330.16	2607.07	1.11883	2068.96	2076.87	1.00383	2.02977	0.742491	0.795827	0.618635	0.588309	0.928703	1.02806	1.38445	1.1765	1.15868	4465.15	24.2473	3830.2	27.1582
7137915	3	2017-06-09	2015-06-05	735	1	77	2019-02-18	1939-11-22	79	-1	69.6	164.5	25.7204	26.8472	1.02338	29.1945	28.5275	0.896735	1.09457	6.9373	18.9026	7.70769	51151	18.1313	7.26998	0.282654	0.76487	9.50707	49063.9	1981.36	2087.18	1.05341	1783.06	1682.91	0.94383	2.03875	0.757368	0.789666	0.533432	0.566173	0.77073	1.15976	1.06671	1.14402	1.16834	3306.22	24.2277	2925.42	30.4462
7141902	3	2017-06-02	2015-06-05	728	1	72	2019-02-18	1944-12-30	74	-1	78.6	171.5	26.7236	26.4814	1.07089	30.0911	28.0992	0.956926	1.10646	7.05099	19.5752	8.41123	57575.2	18.795	7.9878	0.298905	0.879147	9.61977	55280.3	2215.89	2294.89	1.03565	1972.2	1813.96	0.919766	1.97355	0.729862	0.788232	0.586941	0.550092	0.928708	1.13299	1.09957	1.04802	1.06863	3845.54	24.0896	2845.95	26.56
7142093	3	2018-07-09	2016-07-08	731	1	56	2019-02-18	1962-05-18	57	-1	72.5	174.5	23.8093	27.8054	1.2657	35.5895	28.1185	1.17469	1.24267	6.65537	17.2801	7.87506	52618.5	16.4314	7.44108	0.312528	0.951655	12.2471	50034.1	2296.53	2584.43	1.12536	2038.16	2084.02	1.0225	1.93673	0.835992	0.843932	0.622074	0.593438	1.14788	1.27544	1.34391	1.11404	1.16846	3989.14	24.0863	3385.1	28.8622
8001215	3	2017-05-02	2015-07-15	657	1	52	2019-02-18	1964-06-08	55	-1	72.5	175	23.6735	21.1384	0.929348	23.2897	25.0602	0.949589	1.02051	4.98106	18.5829	8.23894	56910.3	17.7199	7.79503	0.329273	1.0084	8.02879	54267.3	2274.42	2642.98	1.16204	2001.27	2003.1	1.00092	2.34256	0.77965	0.805763	0.650899	0.644763	0.873274	1.01849	1.2711	1.16288	1.16469	4254.4	23.5213	3041.4	22.6624
8005331	3	2017-07-11	2015-06-26	746	1	54	2019-02-18	1963-06-21	56	-1	62.7	167	22.482	20.4278	1.11091	23.4164	21.0785	1.04417	1.07926	4.59284	17.8904	8.08809	49894.6	17.2333	7.73913	0.344237	0.960043	7.32962	48062	1925.61	1832.63	0.951716	1680.73	1373.96	0.81748	1.87303	0.681539	0.693083	0.473506	0.508093	0.721242	0.794378	0.937509	0.980524	0.994123	3621.38	23.9875	3105.16	22.1973
8013788	3	2018-04-24	2016-03-09	776	1	56	2019-02-18	1962-01-10	57	0	74.1	173	24.7586	25.0376	1.27489	33.7045	26.4372	1.23605	1.38624	6.16292	18.4518	8.40597	55224.3	17.7147	8.00924	0.323493	0.968183	10.3116	53018.4	2134.56	2205.89	1.03342	1911.34	1728.64	0.904409	2.13811	0.740549	0.747455	0.578772	0.53945	0.83203	0.917816	1.14851	1.0504	1.06388	3769.94	24.0489	3349.78	22.9601
8025869	3	2017-04-21	2015-06-19	672	1	53	2019-02-18	1963-11-23	55	0	72	174	23.7812	23.6776	1.1876	27.4549	23.118	1.09723	1.15965	5.62894	18.1443	8.25485	54933.7	17.3944	7.82626	0.329094	0.996366	9.46011	52663.4	2201.95	2270.34	1.03106	1968.61	1835.17	0.932215	1.86499	0.721902	0.741428	0.602226	0.619962	0.788827	0.866867	1.08995	1.18783	1.10892	3519.08	24.0433	3192.26	25.9013
8027615	3	2016-11-15	2015-11-02	379	2	55	2019-02-18	1960-12-06	58	50	45	157	18.2563	25.8191	0.809528	25.0159	30.9018	0.80734	0.946115	4.74431	13.6309	5.47373	33598.8	13.0075	5.18887	0.284223	0.700582	11.1592	32062.2	1644.49	1536.56	0.934369	1423.9	1075.27	0.755156	2.09117	0.581665	0.596213	0.488831	0.522121	0.702202	0.82333	0.898781	0.912565	0.931037	3111.33	23.5915	1701.12	30.5265
8048228	3	2018-06-26	2015-06-26	1096	1	69	2019-02-18	1948-07-04	71	-1	69.4	169	24.2989	24.5763	1.23237	29.621	24.0358	1.20131	1.4074	5.94157	18.2344	7.44445	52079.4	17.2553	6.97304	0.28697	0.819615	10.5443	49282.8	2228.19	2796.62	1.25511	1944.92	2158	1.10955	2.25452	0.885686	0.899327	0.658453	0.674426	1.35563	1.45222	1.36536	1.24085	1.20256	4685.98	23.922	3156.31	28.7104
8061846	3	2018-10-15	2016-09-22	753	1	55	2019-02-18	1963-05-18	56	0	71.6	174.5	23.5138	22.0638	1.35099	27.9948	20.7217	1.15334	1.30037	5.20966	18.4021	8.12682	56035	17.6001	7.6811	0.326664	0.994701	9.18619	53592.9	2221.87	2442.1	1.09912	1973.76	2052.82	1.04005	1.56904	0.869336	0.868303	0.708867	0.695088	0.848264	0.972023	1.39889	1.17302	1.23066	3966.6	24.4787	2958.65	22.8147
9000442	3	2018-03-29	2015-04-03	1091	1	58	2019-02-18	1960-12-08	58	-1	61.8	159	24.4452	23.1132	1.1716	28.9605	24.7188	1.07982	1.23882	5.57748	18.5536	8.10299	46905.4	17.735	7.6945	0.314765	0.795757	7.85663	44835.8	1846.16	2069.64	1.12105	1618.99	1546.31	0.955107	2.30376	0.775719	0.831171	0.659257	0.606733	0.960552	1.05298	1.1776	1.09414	1.06047	3507.61	23.6566	2738.67	23.8555
9001011	3	2018-04-08	2015-05-14	1060	1	51	2019-02-18	1967-04-20	52	-1	78.4	172	26.5008	20.8677	1.19144	24.1193	20.2438	1.19433	1.17934	5.50066	20.859	9.52831	61709.4	19.964	9.04341	0.34125	1.00955	7.07142	59061.4	2161.82	2648	1.2249	1912.53	2074.65	1.08477	2.29996	0.800091	0.873636	0.570634	0.656031	0.857882	1.16428	1.30116	1.3573	1.3213	4172.86	23.9898	4300.93	24.0981
9001182	3	2018-07-03	2015-04-13	1177	1	47	2019-02-18	1971-05-22	48	-1	74.6	173	24.9257	24.1645	1.44177	32.5544	22.5795	1.29896	1.69321	6.03829	18.9499	7.96357	56715.3	18.2719	7.62347	0.305848	0.915373	10.5126	54685.9	1991.15	2029.36	1.01919	1733.56	1528.54	0.881733	1.94431	0.725458	0.733331	0.580744	0.529495	0.748058	0.96272	1.067	1.04532	1.08872	4120.29	24.5742	3064.52	22.0725
9002260	3	2017-10-25	2015-04-30	909	1	53	2019-02-18	1964-03-13	55	0	71.4	163.5	26.7093	23.8919	1.254	30.0689	23.9783	1.11503	1.21108	6.37809	20.3175	9.17946	54313.2	19.483	8.71295	0.326214	0.872043	7.67512	52082.5	2051.04	2230.7	1.08759	1812.53	1782.86	0.98363	1.87765	0.77079	0.825626	0.580469	0.615886	0.804837	0.91111	1.20314	1.27729	1.17501	3731.27	24.1437	3487.19	23.7721
6395	1	2016-06-15	2016-06-15	0	1	60	2019-02-18	1956-02-04	63	-1	68.5	173.5	22.7558	25.2128	1.19571	30.4095	25.4322	1.04124	1.08681	5.74755	17.0486	7.6374	51320.2	16.3756	7.26739	0.319365	0.961359	10.5493	49294.3	2035.51	2025.87	0.995263	1797.79	1598.97	0.889406	1.79584	0.675678	0.72569	0.492689	0.48785	0.806946	0.899739	1.17225	1.06042	1.03929	3839.7	24.2988	3043.66	28.173
42585	1	2015-05-21	2015-05-21	0	1	53	2019-02-18	1961-09-05	57	-1	93	182	28.0763	31.9281	1.17776	39.0475	33.154	1.02418	1.05296	9.02982	19.252	8.74273	63770.2	18.3993	8.2872	0.295167	0.977711	13.1012	60945.7	2383.12	2824.41	1.18517	2119.13	2148.68	1.01395	2.55963	0.779784	0.818521	0.662441	0.64107	0.99483	1.13713	1.29578	1.17741	1.17891	5067.18	24.3836	4014.09	34.7454
49541	1	2015-04-03	2015-04-03	0	1	45	2019-02-18	1970-03-24	49	-1	66.8	169	23.3885	23.1433	1.03921	26.8765	25.8624	0.953744	0.971135	5.40098	17.9361	8.01046	51227.4	17.1263	7.59926	0.324914	0.927987	8.41231	48914.4	2143.81	2313.01	1.07892	1881.41	1723.7	0.916176	2.24582	0.729199	0.803621	0.504043	0.534251	0.782309	0.98326	1.21888	1.08825	1.03942	4268.91	23.7733	3083.96	26.4781
68575	1	2015-09-14	2015-09-14	0	1	43	2019-02-18	1972-06-15	47	-1	81	177	25.8546	27.1794	1.1584	34.6821	29.9397	1.06312	1.1407	7.04047	18.8632	8.50759	59096.5	17.7933	7.95301	0.307605	0.963694	11.1005	55744.5	2387.1	3351.95	1.40419	2123.51	2587.7	1.2186	2.89933	0.902658	0.922961	0.704451	0.709155	1.04861	1.27606	1.58536	1.47936	1.4876	4208.91	23.1501	3498.23	28.4894
74238	1	2015-11-13	2015-11-13	0	2	65	2019-02-18	1950-10-01	68	53	43.5	149	19.5937	31.6232	1.07999	33.8795	31.3701	1.10303	1.1493	6.15352	13.3054	5.53814	29539.3	12.8191	5.30733	0.270869	0.601356	13.4485	28459.8	1364.17	1079.48	0.791305	1147.96	755.975	0.658538	1.49622	0.512008	0.53335	0.401166	0.443518	0.59935	0.631398	0.844482	0.833829	0.805194	2868.18	24.3434	1697.12	41.4132
76600	1	2015-03-23	2015-03-23	0	1	41	2019-02-18	1973-05-24	46	-1	62.5	168	22.1443	23.2971	1.15066	27.9451	24.2863	1.15244	1.2852	4.98808	16.4227	7.23799	46351.4	15.7024	6.86755	0.310128	0.875304	10.1492	44318.5	1898.53	2032.87	1.07076	1641.71	1478.05	0.900312	2.1603	0.776451	0.844737	0.520345	0.54382	0.622886	0.760691	1.1196	1.09103	1.07687	3794.61	23.6472	2588.25	24.2102
129394	1	2015-09-30	2015-09-30	0	1	49	2019-02-18	1965-11-27	53	-1	68.2	172.5	22.9196	24.0749	1.04552	26.6222	25.463	0.874362	0.842971	5.44989	17.1874	7.96751	51143.1	16.4513	7.57171	0.33036	0.983028	8.87207	48952.9	2050.64	2190.22	1.06806	1797.79	1596.13	0.887826	2.3496	0.692948	0.710169	0.486639	0.505154	0.694136	0.819629	0.998086	1.13146	1.08948	3844.56	23.4611	3430.59	25.371
343041	1	2015-06-05	2015-06-05	0	1	81	2019-02-18	1937-03-12	82	-1	64.4	168.5	22.6822	27.0795	1.1046	30.3433	27.47	1.15513	1.25493	6.15911	16.5854	7.48097	47089.7	15.8562	7.08321	0.31228	0.886633	11.6252	45019.3	1984.54	2070.37	1.04325	1755.19	1661.3	0.946507	1.78358	0.73239	0.759772	0.525142	0.567599	0.973191	1.19273	1.1615	1.11849	1.10786	3605.54	24.341	2789.64	28.1713
409830	1	2016-09-01	2016-09-01	0	1	54	2019-02-18	1961-11-05	57	-1	77.1	180.5	23.6646	21.6608	1.09396	23.9832	21.9233	0.949861	1.02316	5.19685	18.7951	8.41116	61234.8	18.1128	8.02711	0.339203	1.10513	8.50069	59012	2263.67	2222.84	0.981965	2000.87	1790.39	0.894807	1.64555	0.69937	0.733558	0.532337	0.546316	0.73044	0.896649	1.03818	1.07371	1.08934	3907.7	24.3233	3455.5	23.7659
490207	1	2016-06-21	2016-06-21	0	1	40	2019-02-18	1975-08-14	44	-1	67.4	173.5	22.3904	22.9391	1.03034	26.856	26.0651	0.899991	0.957049	5.19818	17.4626	7.91202	52566.2	16.6047	7.47522	0.333859	1.00499	8.90236	49984	2141.82	2582.19	1.20561	1879.42	1974.14	1.0504	2.31725	0.837793	0.786705	0.570462	0.586174	0.822121	1.14406	1.47067	1.24437	1.2693	3756.53	23.3265	3455.31	21.791
491688	1	2015-04-14	2015-04-14	0	1	42	2019-02-18	1972-09-05	46	-1	85.4	179.5	26.5051	21.7858	1.02807	24.5649	23.8942	0.916805	0.839996	5.75887	20.6752	10.0137	66616	19.8629	9.54054	0.359952	1.15977	7.01481	63998.9	2364.41	2617.06	1.10685	2083.69	2088.58	1.00235	1.88257	0.737161	0.809827	0.562184	0.588943	0.859846	0.865171	1.22557	1.26171	1.23745	4523.89	23.9676	4243.87	23.5724
526343	1	2016-08-04	2016-08-04	0	1	53	2019-02-18	1963-08-05	56	0	69.3	168	24.5536	27.8448	1.09054	32.0456	29.3851	1.05643	1.10412	6.86347	17.7856	7.85547	50198	17.0415	7.43861	0.302954	0.855058	10.6971	48098.1	1961.85	2099.93	1.07039	1736.47	1657.57	0.954561	1.96282	0.766375	0.779693	0.610836	0.621538	0.847438	0.930681	1.14619	1.15677	1.13236	3778.53	24.5365	3341.04	31.219
618523	1	2016-06-02	2016-06-02	0	1	50	2019-02-18	1966-04-15	53	0	63	168	22.3214	18.8993	1.25306	23.3098	18.6023	1.04887	1.05847	4.29369	18.4251	8.47626	52003.1	17.5439	8.01984	0.359289	1.01406	6.61496	49515.9	2140.63	2487.18	1.16189	1888.18	1901.75	1.00719	2.31902	0.753102	0.828949	0.615432	0.593949	0.86967	1.06981	1.24287	1.18693	1.21669	3555.23	23.2772	3302.53	18.699
1234684	1	2015-05-27	2015-05-27	0	1	48	2019-02-18	1967-02-23	52	-1	69.2	174.5	22.7256	26.2228	1.05105	30.3864	28.9106	0.963625	1.10798	5.97465	16.8095	7.28236	51185.4	15.9834	6.87682	0.302602	0.921432	11.5747	48669.9	2166.51	2515.45	1.16106	1924.02	1959.26	1.01832	2.29366	0.782453	0.852542	0.561981	0.670499	0.964066	1.14619	1.42745	1.16382	1.10363	3658.45	23.4809	2879.57	28.4253
1247260	1	2015-06-08	2015-06-08	0	1	82	2019-02-18	1932-09-09	87	-1	63	160	24.6094	28.0551	1.20222	32.3188	26.8826	1.04603	1.14626	6.69802	17.1765	7.29385	43971.9	16.3924	6.90851	0.280727	0.71866	10.5767	41964.5	1816.91	2007.41	1.10485	1576.4	1375.6	0.872617	2.62707	0.678616	0.699673	0.493067	0.4731	0.776667	0.950654	0.919807	1.17368	1.1014	4035.7	23.5538	2665.47	33.3273
1283096	1	2015-06-04	2015-06-04	0	1	77	2019-02-18	1937-10-28	81	-1	86.9	164.5	32.1135	27.0314	1.17276	31.7752	27.0944	0.930592	0.936925	5.66914	15.3033	6.72349	41411.1	14.6567	6.3889	0.198947	0.538357	11.0028	39661.3	1738.46	1749.74	1.00648	1504.73	1244.75	0.827226	2.16052	0.633542	0.734445	0.468834	0.471465	0.726249	0.797137	1.06158	0.942795	1.03743	3762.27	24.581	2350.64	34.8519
1289441	1	2015-03-07	2015-03-07	0	1	13	2019-02-18	2002-01-03	17	-1	40	148.5	18.1387	17.615	0.901334	17.2572	19.1463	0.767858	0.605875	3.16721	14.8129	7.34943	32665.9	14.1965	7.03273	0.387719	0.855008	4.54314	31306.4	1462.13	1359.48	0.929797	1222.02	985.808	0.806702	1.55629	0.613916	0.606456	0.489431	0.43221	0.658282	0.671241	0.906328	0.973781	0.997116	3021.16	23.9177	1947.93	20.4481
1338749	1	2015-06-11	2015-06-11	0	1	57	2019-02-18	1957-09-15	61	-1	80	179.5	24.8291	23.3299	1.25302	29.0014	23.1451	1.2466	1.32839	5.7447	18.8791	8.25152	60829	18.1003	7.84401	0.31592	1.0179	10.1368	58319.6	2191.99	2509.39	1.1448	1939.95	1934.95	0.997424	2.27907	0.763509	0.799267	0.570895	0.607276	0.881555	1.07241	1.28004	1.19623	1.17483	4455.16	23.9573	3777.62	27.8731
1381472	1	2015-04-21	2015-04-21	0	1	51	2019-02-18	1963-10-14	55	-1	72	171	24.623	25.583	1.16691	30.9044	26.4838	1.02514	1.03016	6.2701	18.2387	8.2395	53331.9	17.4994	7.87951	0.320007	0.935731	9.51499	51170.1	2115.15	2161.8	1.02206	1861.9	1566.17	0.841164	2.35203	0.682539	0.679292	0.568972	0.555038	0.822889	0.975012	1.0416	0.999914	0.933725	4171.94	23.7721	3317.83	28.416
1429022	1	2015-06-04	2015-06-04	0	1	80	2019-02-18	1935-03-05	84	-1	61.5	172	20.7883	21.4866	1.23393	26.4085	21.402	1.1473	1.09341	4.49855	16.438	7.63529	48630.3	15.7092	7.22361	0.347485	1.028	9.09078	46474.1	2059	2156.14	1.04718	1805.76	1664.46	0.921751	1.94154	0.760328	0.74609	0.494048	0.519989	0.821643	0.889742	1.0098	1.10915	1.17219	4015.13	24.1271	2904.64	24.2172
1633143	1	2015-07-03	2015-07-03	0	1	53	2019-02-18	1961-12-18	57	-1	76	172.5	25.5409	23.6351	1.22591	32.4471	26.4678	1.00638	1.09901	6.14821	19.8648	8.69025	59110.3	19.0698	8.2259	0.322069	0.958355	8.42787	56744.6	2246.15	2365.73	1.05324	2013.21	1918.09	0.952754	1.92169	0.781565	0.815485	0.572143	0.628304	0.874867	0.861913	1.19453	1.12216	1.10192	3859.73	24.3684	3963.15	26.855
1792717	1	2014-09-16	2014-09-16	0	2		2019-02-18	1966-12-13	52	50	55	162	20.9572	26.5856	0.765883	23.3413	30.4763	0.725621	0.647206	5.72802	15.8175	6.82495	41511.5	15.0376	6.47731	0.309074	0.811133	8.7231	39464.6	1861.11	2046.89	1.09982	1614.63	1395.22	0.86411	2.64395	0.641236	0.670443	0.557444	0.633045	0.85967	1.04593	1.09129	0.998903	1.00974	3635.92	23.0947	2105.48	40.2429
1801714	1	2015-06-24	2015-06-24	0	1	46	2019-02-18	1969-01-11	50	-1	66.3	171	22.6736	23.5567	1.08492	26.251	24.1963	1.04675	1.04782	5.31702	17.2542	7.67564	50452.9	16.4675	7.30315	0.322099	0.941849	9.32723	48152.6	2128.68	2300.23	1.08059	1875.04	1753.33	0.935089	2.15618	0.685241	0.725932	0.615322	0.61201	0.997697	1.18958	1.21246	1.06879	1.04118	3807.08	23.7047	2533.09	29.5882
1917951	1	2015-11-03	2015-11-03	0	1	41	2019-02-18	1974-03-15	45	-1	67	170	23.1834	23.894	1.15045	28.7119	24.9571	1.06381	1.13024	5.51448	17.5644	7.83753	50761.2	16.7589	7.42128	0.320112	0.925123	9.47716	48433.1	2141.82	2328.04	1.08694	1899.33	1744	0.918218	2.4085	0.734062	0.767519	0.567809	0.564638	0.799712	0.866383	1.14133	1.13155	1.13246	3685.93	23.4643	3000.06	26.4774
1926510	1	2015-10-15	2015-10-15	0	1	45	2019-02-18	1970-01-20	49	-1	66.8	175	21.8122	26.351	0.972773	28.4558	29.2523	0.961334	1.02709	5.66474	15.8325	6.95761	48487	15.1275	6.59492	0.302349	0.925945	12.0882	46328	2042.28	2159.03	1.05717	1786.64	1551.25	0.868248	2.37755	0.734748	0.765463	0.523978	0.554809	0.695885	0.840522	1.09362	1.06708	1.00121	3956.67	23.5498	2886.8	28.6913
1975332	1	2015-10-20	2015-10-20	0	1	44	2019-02-18	1971-05-10	48	-1	81.7	170.5	28.1043	19.8984	1.32311	25.2963	19.1188	1.08391	1.08156	5.59736	22.5324	10.2849	65502.1	21.5706	9.74238	0.346651	1.00772	5.9149	62706.2	2310.65	2795.89	1.21	2057.81	2276.29	1.10617	2.05501	0.900812	0.929101	0.652614	0.594165	1.09898	1.17623	1.25974	1.32924	1.33167	4129.39	23.8782	4269.83	22.9198
1978164	1	2016-09-21	2016-09-21	0	1	53	2019-02-18	1962-09-29	56	0	73.7	159	29.1523	27.7524	1.71939	39.0517	22.7125	1.56165	1.87158	8.07208	21.0139	9.05473	53125.4	20.2478	8.65844	0.297007	0.750863	9.40795	51188.4	1842.39	1936.93	1.05131	1603.08	1445.84	0.901909	2.05213	0.754461	0.790817	0.561948	0.531859	0.850454	0.800799	1.12641	1.09242	1.1417	4076.59	24.5724	3164.89	27.2774
2010647	1	2015-06-04	2015-06-04	0	1	80	2019-02-18	1934-12-03	84	-1	75.7	166.5	27.3066	32.7508	1.24349	39.9039	32.0902	1.0827	1.27626	8.76056	17.9886	7.41	49868.3	17.2577	7.01944	0.25706	0.712629	13.3791	47842.2	1957.07	2026.1	1.03527	1734.08	1483.47	0.85548	2.43348	0.720327	0.733696	0.5953	0.488387	0.708634	0.764612	0.96464	1.05571	1.09829	4313.56	24.9107	2737.35	37.4769
2068274	1	2015-07-07	2015-07-07	0	1	57	2019-02-18	1958-05-15	61	-1	71	169	24.8591	23.9757	1.17547	29.3422	24.962	1.01782	1.04111	5.92144	18.7762	8.46978	53626.7	18.0522	8.07309	0.324754	0.927531	8.43335	51558.9	2079.71	2067.88	0.994313	1847.57	1576.01	0.853022	2.11883	0.698718	0.670437	0.502792	0.524207	0.731909	0.819408	1.10632	1.04612	0.995797	3889.04	24.1178	3295.9	27.4575
2146090	1	2015-07-22	2015-07-22	0	1	45	2019-02-18	1970-05-24	49	-1	70.4	168.5	24.7955	25.4128	1.02009	28.4137	27.8541	1.01238	0.963664	6.2536	18.3545	8.40232	52112.6	17.5514	7.9617	0.321094	0.911659	8.87903	49832.5	2107.98	2280.06	1.08164	1870.26	1826.94	0.976835	1.90617	0.751256	0.813301	0.570897	0.602863	0.96688	1.06603	1.1433	1.15096	1.17716	3761.51	24.3016	2947.91	32.2191
2168166	1	2016-09-05	2016-09-05	0	1	45	2019-02-18	1970-11-03	48	-1	73.6	172	24.8783	24.4617	1.14081	29.688	26.0235	1.04339	1.18409	6.08015	18.7756	8.12458	55545.7	17.9466	7.67239	0.308397	0.912361	9.55327	53093.4	2123.11	2452.38	1.15509	1883.01	1926.79	1.02325	2.18902	0.820096	0.861722	0.626985	0.609942	0.805596	0.954878	1.26888	1.28265	1.19798	3925.83	23.8548	3286.72	26.619
2187898	1	2015-09-09	2015-09-09	0	1	49	2019-02-18	1966-07-08	53	-1	69.8	170.5	24.0108	26.0983	1.31614	33.1187	25.1635	1.22742	1.46662	6.23004	17.6414	7.67481	51284.1	16.9524	7.3199	0.304859	0.886232	11.3485	49281	2010.82	2003.06	0.996138	1759.97	1519.27	0.863235	1.92857	0.741634	0.721803	0.500011	0.501378	0.688359	0.846014	1.09607	1.06052	1.03275	3906.15	24.1542	3062.01	23.941
2238353	1	2015-07-20	2015-07-20	0	1	55	2019-02-18	1959-11-16	59	-1	58.7	172	19.8418	19.5091	1.05821	22.4566	21.2213	0.983436	1.0755	3.81668	15.7469	6.94743	46585.5	15.0268	6.58298	0.331773	0.981518	8.58817	44455.2	1970.61	2130.31	1.08104	1703.82	1559.96	0.915567	2.13787	0.749512	0.811835	0.540308	0.578925	0.760799	0.871576	1.0642	1.11944	1.08339	3944.82	23.6397	3142.02	19.5938
2263535	1	2015-11-12	2015-11-12	0	1	47	2019-02-18	1968-09-20	50	-1	69.6	176	22.469	20.2145	0.827514	19.1321	23.12	0.823088	0.820263	4.53035	17.881	8.12809	55388.1	17.0288	7.69311	0.342387	1.06058	7.25953	52748.6	2285.57	2639.59	1.15489	2019.98	2063.04	1.02132	2.17082	0.803815	0.845162	0.575769	0.575093	0.900552	1.14622	1.3898	1.17249	1.16512	4004.28	23.6727	3471.18	24.1009
2292589	1	2015-04-03	2015-04-03	0	1	50	2019-02-18	1964-05-12	55	-1	71.2	175	23.249	21.5488	1.22838	27.9455	22.7499	1.33008	1.49481	5.72024	20.8253	9.27365	63777.5	19.8763	8.77871	0.377596	1.15639	8.27177	60871.2	2356.84	2906.36	1.23316	2109.57	2378.23	1.12735	2.13584	0.869508	0.931431	0.681727	0.758214	1.05303	1.24356	1.65121	1.2701	1.23814	4100.66	23.9896	3956.93	21.7028
2459803	1	2016-10-17	2016-10-17	0	1	47	2019-02-18	1968-11-26	50	-1	73.1	169.5	25.4436	23.3733	1.13837	29.1302	25.5894	1.22844	1.26239	5.91389	19.388	8.83383	55702.2	18.4456	8.36036	0.328584	0.944031	8.60081	52994.8	2205.93	2707.38	1.22732	1961.45	2119.32	1.08049	2.40532	0.829066	0.906379	0.716707	0.691948	0.907653	1.34168	1.54421	1.13865	1.22262	4007.05	23.7348	3242.52	25.2385
2466747	1	2016-05-20	2016-05-20	0	1	41	2019-02-18	1974-07-05	45	-1	75.6	178	23.8606	20.6892	1.0243	23.5543	22.9955	1.02239	0.928453	4.91194	18.8297	9.10788	59659.9	17.9605	8.6373	0.36199	1.14693	7.49056	56906.2	2299.9	2753.7	1.19731	2036.31	2181.64	1.07137	2.17022	0.772311	0.879646	0.581938	0.607854	0.893745	1.14206	1.50047	1.23649	1.24834	3797.13	23.557	3726.49	24.5739
2483452	1	2015-11-13	2015-11-13	0	2	58	2019-02-18	1959-06-14	60	52	80	162	30.4832	38.5687	1.12486	38.5422	34.2639	1.20886	1.58928	12.009	19.1276	7.0669	50198.5	18.1823	6.62321	0.217274	0.570215	15.8377	47717.6	2041.08	2480.93	1.2155	1814.92	1964.69	1.08252	2.28256	0.706494	0.738834	0.699714	0.737315	1.0869	1.26721	1.6772	1.27449	1.30639	3656.67	23.8898	2371.75	52.1822
2583707	1	2015-10-30	2015-10-30	0	1	40	2019-02-18	1974-11-03	44	-1	55.9	168.5	19.6885	21.1514	0.9355	24.7266	26.4314	0.944359	0.915495	4.09425	15.2627	7.05642	43334.1	14.4803	6.65811	0.338173	0.960149	8.73052	41112.8	2052.63	2221.34	1.08219	1798.19	1630.18	0.906564	2.3234	0.73741	0.764268	0.513039	0.554936	0.715496	0.975429	1.11233	1.10003	1.08619	3951.07	23.3349	2914.11	20.781
2723510	1	2017-07-18	2017-07-18	0	1	53	2019-02-18	1964-03-24	55	-1	75.7	173.5	25.1476	26.9701	1.49335	34.417	23.0469	1.28009	1.45881	6.81504	18.4538	8.17567	55550.1	17.6371	7.72728	0.307277	0.924972	11.6031	53091.7	2137.05	2458.43	1.15039	1902.52	1932.75	1.01589	2.24142	0.767124	0.783564	0.562919	0.576663	0.827292	0.951216	1.217	1.33369	1.32559	4011.88	23.9252	3111.5	26.9867
2763358	1	2015-10-14	2015-10-14	0	1	51	2019-02-18	1964-02-25	55	-1	83.4	179	26.0292	21.8271	1.33757	28.5348	21.3333	1.34984	1.48482	5.69588	20.3995	9.15577	65362.2	19.4835	8.66736	0.332987	1.06692	8.94489	62427.2	2418.16	2935.04	1.21375	2162.93	2273.2	1.05098	2.59307	0.826552	0.885344	0.642187	0.662786	0.913535	1.0691	1.30747	1.27229	1.25734	4421.66	23.6233	3726.12	21.4274
2903701	1	2015-10-13	2015-10-13	0	1	55	2019-02-18	1959-12-07	59	-1	71.8	170	24.8443	28.8642	1.15317	33.5875	29.1261	1.02495	1.21835	7.09053	17.4746	7.4835	50501.7	16.8779	7.16837	0.288532	0.833857	11.9154	48777.2	1872.65	1724.45	0.920858	1657.24	1330.49	0.802836	1.82882	0.676095	0.664609	0.47127	0.479326	0.7414	0.725508	1.01795	0.953591	0.976834	3538.41	24.3254	3101.99	27.9077
2906892	1	2015-10-14	2015-10-14	0	1	58	2019-02-18	1956-11-23	62	-1	72.8	165	26.7401	24.1487	1.1256	27.356	24.3035	1.17438	1.31951	6.43666	20.2175	8.63681	55042.3	19.5396	8.27838	0.309586	0.842848	8.24319	53196.7	1879.02	1845.59	0.982206	1654.05	1433.56	0.866698	1.83144	0.732004	0.769528	0.499369	0.581373	0.816661	0.855702	1.02728	1.03286	1.02199	3882.73	24.6212	3777.77	25.8076
2938393	1	2015-05-21	2015-05-21	0	1	52	2019-02-18	1962-10-20	56	-1	67.4	165	24.7567	24.3685	1.32926	31.4641	23.6705	1.17868	1.23304	5.99015	18.5914	8.40112	50615.1	17.8452	8.03424	0.324528	0.883529	8.79482	48583.4	1944.33	2031.65	1.04491	1692.67	1488.26	0.879236	2.15931	0.699976	0.761408	0.545019	0.565177	0.778084	0.903289	1.20845	1.03995	0.988607	4129.54	24.2063	2804.9	28.5644
2989731	1	2015-07-20	2015-07-20	0	1	53	2019-02-18	1962-04-07	57	-1	69.7	166	25.2939	26.6184	1.47976	34.0711	23.0248	1.37563	1.67857	6.74525	18.5953	7.7714	51241.3	17.7901	7.36942	0.291351	0.802847	11.023	49022.3	1993.7	2219.01	1.11301	1781.87	1705.6	0.9572	2.42363	0.773699	0.803716	0.592845	0.593043	0.900811	1.00934	1.33469	1.15347	1.11864	3743.8	24.0965	3014.67	29.5057
3036598	1	2015-11-02	2015-11-02	0	2	44	2019-02-18	1971-04-17	48	-1	55.6	159	21.9928	33.4889	0.735313	28.0599	38.1605	0.751658	0.77575	7.46747	14.8309	5.91334	37493.9	13.9725	5.54523	0.252139	0.637431	13.3064	35323.8	1784.65	2170.05	1.21595	1547.34	1444.77	0.933713	3.05615	0.69402	0.724925	0.613976	0.598688	0.875995	1.09156	1.21526	1.10449	1.1109	3690.13	22.8011	1791.64	45.8071
3077673	1	2015-06-02	2015-06-02	0	1	47	2019-02-18	1967-12-17	51	-1	57.3	173	19.1453	19.0131	0.751635	17.8982	23.8123	0.849266	0.813613	3.60085	15.338	6.93549	45905	14.5482	6.5471	0.341969	1.02348	7.75933	43541.2	2074.53	2363.84	1.13946	1801.38	1609.53	0.893499	2.76151	0.688452	0.73536	0.542043	0.518298	0.811824	0.977483	0.921498	1.09604	1.1189	4273.92	22.8308	2899.78	21.1745
3130723	1	2015-06-09	2015-06-09	0	1	79	2019-02-18	1936-03-14	83	-1	66	162.5	24.9941	20.9765	1.06352	22.9096	21.5412	0.889398	0.927234	4.86999	18.3464	7.58066	48445.8	17.5269	7.17082	0.286901	0.757597	6.86971	46282	1930.39	2163.84	1.12093	1687.9	1548.54	0.917438	2.53738	0.739338	0.745771	0.542585	0.588976	0.843154	0.983826	1.06323	1.10236	1.08431	4109.35	23.5779	2505.46	29.7701
3179655	1	2015-05-25	2015-05-25	0	1	43	2019-02-18	1971-07-02	48	-1	70.1	169.5	24.3994	21.717	1.11954	27.5775	24.6329	1.10485	1.00154	5.34113	19.2531	9.29394	55314.7	18.2203	8.74597	0.358451	1.02984	7.37699	52347.3	2228.63	2967.32	1.33146	1937.56	2202.47	1.13673	2.62771	0.931364	0.956227	0.624136	0.625695	0.916106	1.0828	1.38888	1.38274	1.39812	4359.69	23.083	3534.33	23.4577
3268371	1	2015-06-01	2015-06-01	0	1	35	2019-02-18	1979-07-10	40	-1	64	163.5	23.9411	20.5742	1.20608	27.0357	22.4161	0.99355	0.874278	4.90446	18.9334	9.04477	50613.3	18.0368	8.54646	0.356978	0.954283	6.19826	48216.3	2004.45	2396.98	1.19583	1748.02	1861.45	1.06489	2.0884	0.800216	0.841747	0.584367	0.501449	0.933453	1.04656	1.30712	1.36986	1.28886	4122.4	23.8277	3455.45	22.8165
3327966	1	2015-07-09	2015-07-09	0	1	38	2019-02-18	1976-09-27	42	-1	68	161.5	26.0714	25.2372	1.1904	30.9449	25.9954	1.23894	1.25663	6.5478	19.3972	8.90023	50592.3	18.5947	8.47813	0.325189	0.848167	8.35295	48499.3	1903.31	2093.01	1.09967	1679.93	1634.58	0.973001	2.05228	0.726615	0.786146	0.531011	0.571582	0.902173	0.956203	1.36767	1.14399	1.15376	3605.14	24.4448	3097.25	28.8411
3404927	1	2015-07-30	2015-07-30	0	1	51	2019-02-18	1963-10-30	55	0	63.1	158.5	25.1172	24.5698	1.3476	31.0248	23.0223	1.22755	1.21895	6.17006	18.9423	8.4113	47587.3	18.2011	8.02679	0.319574	0.802841	8.09229	45725.3	1830.84	1861.92	1.01697	1589.94	1377.17	0.866176	2.01222	0.721067	0.71644	0.495876	0.51098	0.822362	0.798941	1.05922	1.04336	1.05475	4105.66	24.2232	2982.98	28.5891
3406540	1	2016-08-24	2016-08-24	0	1	48	2019-02-18	1968-02-08	51	-1	68.2	169.5	23.738	21.5784	0.959719	25.9198	27.0077	0.885025	0.850279	5.08459	18.4788	8.74923	53090	17.5685	8.25899	0.347922	0.999589	7.08003	50474.9	2150.19	2615.1	1.21622	1906.5	2038.9	1.06945	2.36452	0.852225	0.883527	0.65234	0.71667	0.920405	1.15782	1.31029	1.25744	1.23669	3744.83	23.442	3622.78	22.6172
3577650	1	2014-09-19	2014-09-19	0	1	6	2019-02-18	2008-09-08	10	-1	15	111	12.1743	17.2177	0.93981	18.7371	19.9371	1.0236	1.14367	2.08904	10.0441	3.99207	12375.3	9.56194	3.82546	0.314223	0.387154	5.14454	11781.3	987.891	594.055	0.601336	773.27	342.137	0.442455	1.17378	0.354329	0.333981	0.423759	0.361661	0.469172	0.561283	0.488858	0.479271	0.470417	2279.71	24.2379	552.213	17.4036
3594039	1	2016-09-09	2016-09-09	0	1	42	2019-02-18	1974-05-30	45	-1	82	181.5	24.892	22.4401	1.06631	25.2062	23.6386	1.02579	1.0755	5.57382	19.2648	8.72938	63462.7	18.2015	8.19907	0.329385	1.08507	9.06091	59959.8	2471.12	3502.92	1.41754	2211.9	2723.08	1.2311	3.00846	0.940613	0.966472	0.773367	0.723656	1.03089	1.19157	1.73201	1.39449	1.43783	4329.05	22.9782	3754.62	24.0377
3653157	1	2016-06-27	2016-06-27	0	1	69	2019-02-18	1947-11-20	71	-1	81.8	174	27.0181	24.2801	1.07702	28.209	26.1917	0.944089	1.02809	6.61817	20.6394	9.08525	62488	19.7978	8.62162	0.319105	0.966123	8.27165	59939.8	2334.54	2548.14	1.09149	2078.11	2007.61	0.966075	2.10789	0.742377	0.763239	0.590938	0.555088	0.8371	0.969216	1.29081	1.15982	1.12969	4203.76	24.0246	3611.47	27.3851
3728389	1	2015-09-28	2015-09-28	0	1	42	2019-02-18	1973-04-15	46	-1	72	178	22.7244	27.0191	1.23358	32.4944	26.3416	1.2015	1.20697	6.05462	16.354	7.56108	51816.1	15.5606	7.12139	0.313381	0.992915	12.9673	49302.3	2231.41	2513.76	1.12653	1969.01	1958.75	0.994788	2.11511	0.797716	0.85787	0.517759	0.540481	0.795527	1.0162	1.24158	1.22464	1.18696	4042.28	23.8938	2926.85	30.1447
3744056	1	2016-07-28	2016-07-28	0	1	55	2019-02-18	1960-09-03	58	-1	68.1	170.5	23.426	18.7419	0.887546	20.1757	22.732	0.980713	0.980205	4.36252	18.9143	8.71146	54984.2	18.0837	8.26178	0.352676	1.02524	6.3667	52569.8	2203.14	2414.38	1.09588	1940.34	1875.75	0.96671	2.04957	0.792116	0.841684	0.551901	0.555487	0.756882	0.97316	1.23608	1.15283	1.12603	4191.41	23.8902	3644.94	18.9914
3747874	1	2015-05-12	2015-05-12	0	1	38	2019-02-18	1976-06-19	43	-1	66.8	157	27.1005	27.6421	1.29409	34.9026	26.9707	1.20077	1.31241	7.48002	19.5802	8.56525	48263.2	18.8183	8.16985	0.301465	0.743081	8.92825	46385.1	1857.92	1878.14	1.01088	1603.88	1405.68	0.876424	1.8598	0.722783	0.745332	0.506373	0.565145	0.827187	0.886764	1.07709	1.06755	1.04803	4034.02	24.6305	2847.43	30.2729
3792793	1	2015-02-14	2015-02-14	0	1	6	2019-02-18	2008-10-04	10	-1	16	105.3	14.4299	18.8544	0.648438	15.2638	23.5393	0.796655	0.680789	2.66588	11.4734	4.63886	12721.8	10.8883	4.44304	0.307905	0.341408	3.66463	12073.1	956.833	648.751	0.67802	735.841	348.475	0.473573	1.35877	0.367243	0.336945	0.432309	0.425444	0.531474	0.52662	0.528306	0.518484	0.534388	2436.49	24.0384	654.448	24.0356
3871024	1	2015-07-24	2015-07-24	0	1	6	2019-02-18	2009-02-19	10	-1	15	105	13.6054	23.801	0.667384	18.3205	27.4512	0.694397	0.720443	3.15338	10.0955	3.45216	11130.3	9.60014	3.29872	0.242456	0.267308	6.24382	10584.2	922.987	546.165	0.591736	711.552	280.575	0.394314	1.25613	0.262207	0.276565	0.342275	0.344599	0.449484	0.512514	0.462881	0.427274	0.43683	2368.36	24.2374	407.224	33.666
4077029	1	2016-07-26	2016-07-26	0	1	57	2019-02-18	1958-09-05	60	-1	70.5	167	25.2788	20.8104	1.1037	23.6945	21.4682	1.11835	1.20144	5.29135	20.1351	8.70645	56154.9	19.2797	8.27423	0.327319	0.91286	7.04705	53769.3	2138.24	2385.6	1.11568	1881.01	1855.47	0.986419	2.06096	0.76297	0.773966	0.579707	0.592774	0.971471	1.15771	1.25921	1.11811	1.13782	4027.28	23.9654	3787.24	21.459
4150182	1	2015-07-22	2015-07-22	0	1	51	2019-02-18	1964-01-10	55	0	76.6	168.5	26.9792	24.8478	1.32076	30.1419	22.8216	1.19099	1.26725	6.68614	20.2223	8.87885	57415.7	19.4208	8.45205	0.31328	0.889474	8.76067	55140	2097.63	2275.65	1.08487	1852.74	1704.28	0.919867	2.33327	0.74642	0.750645	0.556469	0.519504	0.833536	1.02238	1.13819	1.1169	1.11047	4318.91	24.2222	3530.02	28.9624
4205850	1	2015-06-04	2015-06-04	0	1	70	2019-02-18	1944-10-18	74	-1	64.7	174	21.3701	21.0912	1.2235	28.3621	23.1811	1.07018	1.06298	4.53902	16.9818	7.80689	51414.2	16.317	7.42269	0.347341	1.05161	8.65345	49401.4	2025.95	2012.81	0.993511	1781.07	1580.94	0.887633	1.76358	0.684701	0.766047	0.506931	0.555965	0.77203	0.858747	1.04992	1.06968	1.03406	3804.89	24.1829	2896.38	25.9869
4207738	1	2016-08-18	2016-08-18	0	1	53	2019-02-18	1963-05-19	56	0	63.8	160	24.9219	28.4394	1.07862	32.209	29.8615	0.921451	0.994083	7.07691	17.8073	7.62601	45586.6	17.0933	7.26478	0.291502	0.746245	9.67182	43758.9	1863.89	1827.7	0.980582	1623.39	1320.09	0.813167	2.11064	0.661798	0.690115	0.447021	0.489788	0.704182	0.853121	0.956749	0.991512	0.970831	3735.65	23.8977	2692.59	33.093
4236901	1	2015-06-18	2015-06-18	0	1	44	2019-02-18	1970-09-16	48	-1	71.4	172	24.1347	20.4944	1.33515	25.7739	19.3041	1.28176	1.41905	4.95424	19.2194	8.42553	56858.5	18.3609	7.97242	0.330331	0.97725	8.14129	54318.8	2190	2539.72	1.15969	1941.14	2035.74	1.04873	2.02512	0.806512	0.891867	0.623111	0.670307	0.880768	1.04811	1.37681	1.21034	1.23314	3940.84	24.0124	3488.57	21.9757
4255052	1	2015-10-30	2015-10-30	0	1	52	2019-02-18	1963-08-23	56	-1	76.5	167	27.4302	21.6221	1.4347	29.002	20.2146	1.32055	1.47541	5.95572	21.5889	9.45282	60209.4	20.4946	8.89526	0.324288	0.904406	7.40671	57157.5	2216.28	3051.85	1.37701	1958.66	2431.47	1.24139	2.4081	0.931841	0.953761	0.714589	0.83249	1.24024	1.27952	1.75119	1.40309	1.44508	4682.67	23.9578	4045.08	21.2975
4259814	1	2015-06-02	2015-06-02	0	1	56	2019-02-18	1958-12-11	60	-1	62.2	166.5	22.4369	21.9253	1.03473	25.3641	24.5127	1.06692	1.02793	4.92599	17.5411	7.90764	48628	16.8136	7.50785	0.334621	0.927645	7.98315	46611	1968.22	2016.93	1.02475	1722.54	1549.3	0.89943	1.90343	0.722709	0.751824	0.525569	0.557884	0.750674	0.875674	1.07477	1.07154	1.08814	3871.22	24.1046	3157.07	26.5587
4278298	1	2015-07-10	2015-07-10	0	1	46	2019-02-18	1968-12-08	50	-1	83	166	30.1205	25.6509	1.44277	32.6126	22.6041	1.15222	1.21235	7.78191	22.5558	10.1836	62154.8	21.707	9.71878	0.322663	0.889131	7.63946	59815.8	2065.77	2339.01	1.13227	1820.49	1867.05	1.02558	1.92414	0.759177	0.806615	0.639836	0.606222	0.849193	0.91654	1.23757	1.29949	1.30113	4312.94	24.5248	3965.6	26.7176
4306576	1	2015-06-08	2015-06-08	0	1	69	2019-02-18	1945-08-27	74	-1	70	171	23.939	23.3388	1.30634	29.6379	22.6877	0.939989	0.976087	5.62957	18.4915	8.14472	54071	17.631	7.71018	0.322076	0.941783	8.50926	51554.9	2096.83	2516.06	1.19993	1832.83	1793.7	0.978646	2.73626	0.72157	0.760304	0.603191	0.620277	0.949272	1.00835	1.10915	1.19682	1.20528	4491.4	23.4175	3369.55	26.7136
4335091	1	2016-07-25	2016-07-25	0	1	52	2019-02-18	1964-02-28	55	0	57.9	167.5	20.6371	17.8791	1.1199	20.2724	18.1019	1.02592	1.07016	3.69214	16.9584	7.59045	47579	16.2657	7.20951	0.349347	0.980137	6.75236	45635.6	1948.71	1943.45	0.997306	1710.19	1497.09	0.875392	1.87146	0.756353	0.759871	0.479637	0.520765	0.71445	0.821851	1.03812	1.04753	1.05114	3378.5	23.8278	2814.64	19.6794
4425576	1	2015-05-21	2015-05-21	0	1	53	2019-02-18	1961-07-18	58	-1	92.5	177	29.5254	26.9058	1.34156	35.0327	26.1133	1.2586	1.43955	7.91307	21.4972	9.44983	67348.6	20.6688	8.97772	0.304068	0.952615	10.2093	64753.3	2382.72	2595.36	1.08924	2125.9	2094.17	0.985076	1.95147	0.810957	0.808975	0.571495	0.554932	0.827066	1.02453	1.20782	1.22766	1.22749	4427.23	24.5717	4285.84	27.7325
4435113	1	2015-06-16	2015-06-16	0	1	56	2019-02-18	1956-05-14	63	-1	66	166	23.9512	21.4956	1.16255	26.4339	22.7378	1.21211	1.44704	5.22158	19.0698	7.99886	52548.8	18.2002	7.58936	0.316867	0.873159	8.24182	50152.6	2037.9	2396.24	1.17584	1777.09	1772.07	0.997179	2.39317	0.780542	0.847657	0.654199	0.656295	0.884537	1.13065	1.41069	1.13381	1.11303	4035.27	23.552	3021.55	23.4148
4547463	1	2015-10-30	2015-10-30	0	1	55	2019-02-18	1960-01-15	59	-1	75.9	169.5	26.4181	21.6713	1.23347	29.2848	23.7417	1.2032	1.17778	5.74205	20.754	9.83261	59626.7	19.7812	9.30055	0.352052	1.01145	7.15642	56831.8	2204.74	2794.91	1.26768	1952.69	2264.87	1.15987	2.10292	0.905808	0.897656	0.679643	0.68199	1.13268	1.25173	1.50631	1.33474	1.33153	4099.12	23.9186	4218.95	22.1706
4556134	1	2015-08-05	2015-08-05	0	1	52	2019-02-18	1962-11-05	56	0	70	170	24.2215	22.1237	1.2053	27.944	23.1842	1.1125	1.1501	5.32202	18.7337	8.57497	54140.4	17.9604	8.17237	0.337402	0.975092	8.13653	51905.5	2061.79	2234.89	1.08396	1811.33	1718.31	0.948645	2.06255	0.781421	0.783238	0.588362	0.615835	0.864113	0.958016	1.24836	1.06842	1.10838	4200.25	23.9791	3484.1	22.3036
4732313	1	2015-11-02	2015-11-02	0	2	42	2019-02-18	1972-12-06	46	-1	59.7	162	22.7481	34.422	0.953421	36.1416	37.9073	0.833123	0.853859	7.81231	14.8834	6.23005	39059.9	14.2174	5.89304	0.259057	0.679869	14.1026	37312.1	1798.19	1747.85	0.972005	1562.47	1301.39	0.832908	1.89399	0.68063	0.675543	0.468702	0.522673	0.741876	0.944391	1.04547	0.995767	0.966806	3402.32	24.03	1805.47	42.142
4734682	1	2015-05-06	2015-05-06	0	1	40	2019-02-18	1975-02-21	44	-1	83.1	173.5	27.6059	26.7559	1.2771	31.2939	24.5039	1.23385	1.32796	7.55184	20.6731	9.24665	62230.7	19.7962	8.80996	0.319133	0.960663	9.88697	59590.9	2213.89	2639.82	1.19239	1953.88	2003.63	1.02546	2.44678	0.813111	0.834038	0.599167	0.68187	0.931942	1.16002	1.28323	1.24323	1.27607	4618.29	24.2328	3630.92	30.6942
4803746	1	2015-06-29	2015-06-29	0	1	49	2019-02-18	1965-09-28	53	-1	73	170	25.2595	24.8509	1.37273	34.0276	24.7882	1.13913	1.16179	6.22748	18.8319	8.49091	54424.2	18.0368	8.06136	0.319142	0.922319	9.30461	52126.5	2094.44	2297.76	1.09707	1827.26	1759.8	0.963079	2.01347	0.751366	0.78474	0.579259	0.58214	0.912376	0.907591	1.19162	1.15906	1.11679	4475.81	24.1451	3389.57	27.9979
4849501	1	2016-05-11	2016-05-11	0	1	49	2019-02-18	1967-01-19	52	0	61.8	164	22.9774	20.6401	1.16047	25.7993	22.2317	1.07409	1.07381	4.75709	18.2908	8.37124	49194.9	17.4122	7.91857	0.344625	0.926902	7.09188	46831.9	1999.67	2362.91	1.18165	1754.39	1768.24	1.0079	2.42444	0.747139	0.804886	0.608765	0.664095	0.923922	0.994781	1.32743	1.19884	1.21245	4005.63	23.6221	3156.57	21.5576
4865909	1	2015-04-16	2015-04-16	0	1	54	2019-02-18	1960-12-07	58	-1	71.5	172.5	24.0286	22.0313	1.18881	29.5248	24.8355	1.08264	1.14447	5.22744	18.4999	8.30614	55048.7	17.692	7.84921	0.326662	0.972023	8.53297	52644.7	2190.8	2403.98	1.09731	1947.51	1909.28	0.980368	2.03341	0.814701	0.846117	0.592983	0.55997	0.800727	0.990869	1.24084	1.17055	1.14922	4220.67	24.1396	3727.41	23.6369
4866648	1	2015-09-25	2015-09-25	0	1	47	2019-02-18	1968-04-13	51	-1	68.1	170	23.564	23.5491	1.07071	26.3236	24.5852	1.11586	1.16598	5.54531	18.0026	7.92494	52027.4	17.301	7.56867	0.321196	0.928257	9.16942	49999.8	1974.19	2027.62	1.02706	1734.88	1562.67	0.900734	1.9429	0.71249	0.748508	0.565279	0.575097	0.752344	0.983985	1.15521	1.0252	1.05946	3999.13	24.1826	3080.81	27.9982
4878418	1	2015-12-03	2015-12-03	0	1	46	2019-02-18	1969-09-04	49	-1	77.4	177	24.7055	23.1773	1.33459	30.1779	22.6121	1.18524	1.31105	5.64968	18.7262	8.20384	58667.4	17.8851	7.77291	0.314622	0.985679	9.82277	56032.4	2312.64	2635.01	1.13939	2069.75	2081.75	1.00579	2.27781	0.783762	0.824031	0.592029	0.645008	1.01974	1.11699	1.34668	1.14799	1.18159	4008.66	23.7922	3483.47	26.1601
4898931	1	2016-08-17	2016-08-17	0	1	58	2019-02-18	1958-07-28	61	0	72.2	168.5	25.4295	27.0763	1.01027	28.4662	28.1768	0.901289	0.951202	6.8765	18.5203	8.06222	52583.3	17.6677	7.60635	0.299116	0.849257	9.59483	50162.6	2125.1	2420.62	1.13906	1873.85	1888.11	1.00761	2.11939	0.821327	0.840658	0.614314	0.607688	0.943154	1.01827	1.19164	1.2193	1.17855	3915.43	23.8958	3382.93	30.4368
4937992	1	2015-05-15	2015-05-15	0	1	51	2019-02-18	1963-10-26	55	0	77	182	23.246	19.8686	1.14153	22.9618	20.1149	1.09619	1.19121	4.5924	18.5215	8.28366	61350.6	17.7621	7.86561	0.338364	1.1208	8.51504	58835.3	2336.14	2515.32	1.0767	2076.52	2028.37	0.976812	1.87566	0.729644	0.750474	0.585749	0.619099	0.757161	0.946357	1.24504	1.22684	1.20641	4020.98	24.0982	4000.24	19.191
4945373	1	2016-09-14	2016-09-14	0	1	45	2019-02-18	1971-05-09	48	-1	82.8	181.5	25.1349	24.7487	1.36776	31.9984	23.3948	1.27343	1.36871	6.20804	18.8763	8.3926	62182.8	18.1946	8.03063	0.319501	1.05251	10.9705	59937.2	2268.84	2245.57	0.98974	1997.68	1756.6	0.879317	1.80324	0.654373	0.727473	0.570484	0.570387	0.785905	0.877359	1.07621	1.05919	1.05862	4418.65	24.3559	3505.44	27.4483
5074353	1	2015-10-22	2015-10-22	0	1	51	2019-02-18	1964-05-10	55	-1	76.6	166	27.7979	24.3756	1.15939	29.3945	25.3533	1.16603	1.1635	6.76129	20.9767	9.52201	57803.3	20.1088	9.05827	0.325861	0.897943	7.71922	55411.7	2154.57	2391.53	1.10998	1916.05	1902.82	0.993094	2.049	0.781017	0.822038	0.661841	0.591564	0.87292	0.95631	1.38705	1.17439	1.1508	4330.62	24.5895	3329.7	28.0753
5166040	1	2015-11-02	2015-11-02	0	2	45	2019-02-18	1970-06-18	49	-1	55.3	154.5	23.1669	38.3508	1.07685	43.177	40.0956	0.959927	0.979096	9.00286	14.4721	6.19503	34545.4	13.7298	5.84952	0.252495	0.602711	15.5358	32773.5	1703.82	1771.91	1.03996	1475.66	1265.45	0.857543	2.2198	0.612795	0.658546	0.53139	0.550109	0.811308	1.08075	1.20312	0.986588	1.00422	3275.01	23.5331	1430.78	48.7334
5214581	1	2015-05-19	2015-05-19	0	1	50	2019-02-18	1964-07-18	55	-1	55.1	166	19.9956	19.6195	0.86907	19.9396	22.9436	0.893618	0.867608	3.87191	15.8631	7.39615	43712.4	15.2105	7.01444	0.350799	0.966661	7.19859	41913.9	1820.49	1798.48	0.987907	1579.59	1379.31	0.873207	1.73999	0.741769	0.760649	0.457476	0.46196	0.624351	0.74385	0.868355	1.11017	1.13032	3630.54	24.1356	2892.45	21.1626
5224275	1	2015-11-06	2015-11-06	0	1	52	2019-02-18	1963-04-20	56	-1	87.3	168.5	30.7478	29.7751	1.06636	30.4884	28.591	1.22881	1.38933	9.15565	21.5937	9.16241	61309.4	20.7548	8.70925	0.283248	0.804204	10.3006	58927.5	2220.27	2381.9	1.0728	1970.21	1905.09	0.966951	1.90679	0.732932	0.774096	0.586272	0.563723	0.905175	1.05432	1.25086	1.19846	1.19468	4512.38	25.4561	3787.93	34.9686
5238003	1	2015-08-04	2015-08-04	0	1	39	2019-02-18	1976-05-26	43	-1	70	170	24.2215	19.9179	1.11034	25.7569	23.1973	1.07678	0.985588	4.80859	19.3334	9.27502	55873.6	18.4411	8.78025	0.362499	1.04762	6.58375	53294.9	2154.57	2578.73	1.19687	1918.05	2079.34	1.08409	2.11141	0.796577	0.869874	0.66151	0.63978	0.898885	1.06926	1.3179	1.28467	1.2887	3934.34	23.9025	3552	22.3021
5242533	1	2017-05-27	2017-05-27	0	1	58	2019-02-18	1958-07-01	61	-1	57.9	172.5	19.4581	23.6588	1.10584	28.0421	25.3581	1.1179	1.1871	4.66009	15.037	6.85448	44744.5	14.3489	6.48678	0.333372	0.991989	11.3826	42697	1983.35	2047.54	1.03237	1756.78	1614.31	0.918903	1.91215	0.723249	0.785836	0.513359	0.574005	0.714875	0.999553	1.18424	1.05795	1.09647	3168.19	23.7772	2360.78	24.6094
5242896	1	2016-10-11	2016-10-11	0	1	46	2019-02-18	1970-10-10	48	-1	70.1	175	22.8898	22.3944	1.10523	25.8719	23.4086	1.21275	1.25444	5.15874	17.8771	8.00261	54748.6	17.0155	7.53113	0.329017	1.00761	9.54033	52110.1	2228.63	2638.45	1.18389	1996.89	2129.31	1.06632	2.19703	0.838698	0.874488	0.58632	0.598379	0.952177	1.2709	1.47861	1.22342	1.2806	3596.96	23.7651	3684.71	24.873
5243483	1	2016-07-19	2016-07-19	0	1	51	2019-02-18	1965-06-05	54	-1	76.6	169.5	26.6618	24.2716	1.22086	28.8895	23.6633	1.07892	1.10954	6.60948	20.6218	9.25777	59246.9	19.8888	8.862	0.332386	0.954953	7.97467	57141.1	2100.81	2105.83	1.00239	1840.4	1591.01	0.86449	1.97695	0.690096	0.717685	0.51596	0.507802	0.704143	0.855488	1.00066	1.05375	1.06826	4166.69	24.0981	3907.53	25.598
5243667	1	2016-05-05	2016-05-05	0	1	48	2019-02-18	1968-10-26	50	-1	78.6	176.5	25.2309	24.7464	1.27505	31.1039	24.3943	1.04564	1.12651	6.23672	18.9658	8.61056	59082.7	18.1676	8.14467	0.322805	1.00561	9.67034	56596.2	2221.06	2486.44	1.11948	1984.54	2044.31	1.03012	1.86931	0.819987	0.826917	0.566451	0.578079	0.776413	0.95081	1.25152	1.32902	1.27774	3677.62	24.1706	3987.35	24.8212
5244187	1	2016-09-22	2016-09-22	0	1	45	2019-02-18	1970-12-08	48	-1	75	171	25.6489	23.0175	1.24743	28.9913	23.2409	0.957193	1.1982	6.00942	20.0986	8.26174	58770.3	19.2478	7.82532	0.305094	0.892124	8.44731	56282.4	2217.88	2487.92	1.12176	1948.31	1872.89	0.961289	2.28153	0.76774	0.801967	0.624074	0.65683	0.798138	0.918996	1.11864	1.18016	1.21059	4350.43	23.7593	3567.23	22.637
5245476	1	2016-07-13	2016-07-13	0	1	54	2019-02-18	1962-12-12	56	-1	75.9	176	24.5028	24.7281	1.18506	30.9664	26.1306	1.07169	1.13458	6.05587	18.434	8.39105	57101	17.719	8.01544	0.327123	1.0133	9.87639	54886.5	2141.82	2214.56	1.03396	1889.77	1714.95	0.907491	1.98216	0.677406	0.772076	0.475617	0.55176	0.678404	0.833135	1.29192	1.09461	1.06902	4062.04	24.0988	3748.61	25.5232
5246064	1	2016-05-19	2016-05-19	0	1	52	2019-02-18	1964-06-25	55	-1	82.5	175	26.9388	29.3902	1.16408	33.9745	29.1857	1.06974	1.14133	7.98083	19.1739	8.71447	58720	18.4138	8.30789	0.308399	0.944472	11.3236	56392.4	2186.02	2327.68	1.0648	1933.18	1791.76	0.926847	2.11955	0.714066	0.762897	0.552484	0.550044	0.823016	0.862195	1.26452	1.10155	1.10188	4299.28	24.1849	3280.93	29.5336
5246078	1	2016-09-19	2016-09-19	0	1	57	2019-02-18	1959-02-09	60	-1	70.8	172.5	23.7933	27.5188	1.14586	31.9429	27.8767	0.982474	1.11792	6.51763	17.1666	7.43953	51081.4	16.3183	7.00987	0.294615	0.876664	11.8291	48557.2	2159.34	2524.27	1.169	1888.18	1811.23	0.959245	2.62956	0.764456	0.777226	0.602136	0.607501	0.843231	0.955821	1.10543	1.19243	1.1673	4191.87	23.3642	3077.56	27.5886
5247417	1	2015-08-13	2015-08-13	0	1	52	2019-02-18	1963-03-10	56	0	69	168.5	24.3024	17.6062	1.02047	19.4053	19.0161	1.04781	1.36326	4.26768	19.972	7.9667	56705	19.1496	7.56123	0.311131	0.883371	6.46883	54370.1	2063.38	2334.84	1.13156	1817.7	1830.1	1.00682	2.05447	0.792471	0.835321	0.688548	0.638497	0.999543	1.04032	1.29855	1.18125	1.13465	4056.66	24.0198	3664.1	18.5603
5250422	1	2017-06-19	2017-06-19	0	1	59	2019-02-18	1958-06-09	61	-1	66	164	24.539	26.669	1.07853	31.2748	28.9975	0.998271	1.24792	6.49614	17.8622	7.25424	48042.3	17.107	6.89452	0.280962	0.755675	10.4835	46010.9	1943.13	2031.42	1.04544	1683.91	1452.29	0.86245	2.23414	0.740846	0.739493	0.523377	0.552863	0.77697	0.906551	1.15031	1.00138	0.999581	4044.1	23.7867	2636.83	28.5722
5251176	1	2015-07-06	2015-07-06	0	1	50	2019-02-18	1965-01-25	54	-1	72.2	165	26.5197	18.5163	1.20508	22.8913	18.9957	1.03609	1.14475	4.88267	21.4869	9.31925	58498	20.4653	8.80099	0.331865	0.903504	5.61796	55716.7	2185.62	2781.32	1.27255	1923.62	2101.68	1.09257	2.59398	0.864142	0.908695	0.553682	0.598026	0.958104	1.16098	1.52492	1.22971	1.29434	4354.01	23.406	3902.84	20.8395
5251415	1	2015-06-08	2015-06-08	0	1	49	2019-02-18	1966-09-28	52	-1	68.5	161.5	26.2631	18.9382	1.01899	21.6668	21.263	0.821918	0.804092	4.99337	21.3733	9.81007	55746.4	20.4277	9.34832	0.355949	0.928396	4.67225	53280	1959.85	2466.36	1.25844	1717.36	1827.92	1.06438	2.63279	0.74556	0.868976	0.60162	0.620019	0.939967	1.03361	1.47463	1.1971	1.29378	3983.32	23.3073	3224.62	21.7427
5252304	1	2016-04-26	2016-04-26	0	1	36	2019-02-18	1979-12-11	39	-1	70.7	174.5	23.2182	20.2103	1.06993	23.3185	21.7944	1.12667	1.07167	4.70127	18.5604	8.67912	56517	17.7468	8.24632	0.355166	1.08149	7.56271	54039.4	2167.71	2477.64	1.14298	1936.36	2010.26	1.03816	2.0203	0.748574	0.722995	0.683986	0.564461	0.838662	1.20091	1.38742	1.2089	1.27513	3643.98	23.9693	3323.14	22.8131
5253665	1	2016-05-18	2016-05-18	0	1	55	2019-02-18	1961-10-09	57	-1	65	169	22.7583	19.6286	1.21465	25.7312	21.184	1.07611	1.2133	4.48994	18.3845	8.03333	52508.1	17.6789	7.65752	0.336472	0.960997	7.38876	50492.7	1979.76	2015.42	1.01801	1740.85	1573.82	0.904051	1.84838	0.738035	0.748001	0.595668	0.565273	0.935479	0.839624	1.05093	1.07066	1.08567	3802.12	24.2037	3331.38	20.2797
5253942	1	2016-07-04	2016-07-04	0	1	45	2019-02-18	1970-11-20	48	-1	70.3	174.5	23.0868	19.5715	0.978003	22.1967	22.6959	1.0789	1.04221	4.48388	18.4264	8.68997	56108.8	17.4927	8.18187	0.354395	1.07914	7.37508	53265.8	2249.73	2842.92	1.26367	1998.88	2231.75	1.1165	2.43634	0.847987	0.867406	0.664996	0.714856	1.05766	1.08012	1.34124	1.34978	1.31478	3935.47	23.3954	3932.03	19.4797
5253956	1	2015-10-08	2015-10-08	0	1	40	2019-02-18	1975-03-07	44	-1	88.1	181	26.8917	25.5917	1.28913	32.2963	25.0528	1.15694	1.17125	6.78997	19.7419	9.0164	64676.5	18.8725	8.5861	0.319284	1.04601	10.3051	61828.3	2384.32	2848.24	1.19457	2104	2126.42	1.01066	2.575	0.838426	0.826473	0.573552	0.580662	1.03532	1.18576	1.30568	1.17955	1.12	5031.91	24.0584	4035.41	28.4388
5253966	1	2016-07-01	2016-07-01	0	1	42	2019-02-18	1973-08-13	46	-1	69.7	173.5	23.1544	22.5442	1.04176	23.5544	22.6103	0.994353	1.04377	5.2101	17.9005	8.04447	53884.6	16.9362	7.57875	0.327313	0.985287	8.91488	50981.9	2227.43	2902.72	1.30317	1961.45	2203.22	1.12326	2.62984	0.80644	0.876154	0.70718	0.641821	1.03139	1.28042	1.77194	1.21599	1.25828	4306.27	23.3438	3244.3	23.5046
5254151	1	2015-08-13	2015-08-13	0	1	51	2019-02-18	1964-05-05	55	0	76	171	25.9909	31.0615	1.23872	38.4448	31.036	1.0369	1.06832	8.06516	17.8999	8.11839	52341.2	17.1704	7.7094	0.296619	0.867344	12.0835	50207.9	2181.24	2133.34	0.978037	1922.82	1700.14	0.884189	1.67633	0.673124	0.712835	0.516282	0.546939	0.775797	0.870915	1.17424	1.09934	0.989199	3961.32	24.4131	2884.62	35.6296
5254316	1	2015-04-09	2015-04-09	0	1	43	2019-02-18	1972-11-02	46	-1	80	175	26.1224	23.6709	1.36399	29.2767	21.4641	1.21216	1.07877	6.09443	19.6521	9.63738	60184.6	18.8658	9.1953	0.352007	1.07802	8.40455	57776.6	2160.14	2407.94	1.11471	1932.78	1936.36	1.00186	2.0741	0.784383	0.814721	0.55415	0.533494	0.801682	0.992468	1.23852	1.22079	1.25246	3877.55	24.2034	3956.38	25.7957
5255085	1	2015-05-25	2015-05-25	0	1	49	2019-02-18	1966-08-21	53	-1	74.4	166.5	26.8376	26.9932	1.17126	32.4846	27.7347	1.07801	1.2838	7.27486	19.6759	8.377	54546	18.9531	7.99368	0.297853	0.825716	9.72279	52542.2	1970.21	2003.8	1.01705	1724.93	1503.23	0.871475	2.04082	0.70913	0.76876	0.561313	0.546996	0.712221	0.753951	1.04924	1.07918	1.04726	4145.54	24.3272	3253.34	28.1653
5268605	1	2015-05-12	2015-05-12	0	1	50	2019-02-18	1964-10-24	54	-1	73.5	166.5	26.513	24.9798	1.37928	32.4207	23.5055	1.24234	1.2559	6.69994	20.1215	8.9483	55781.4	19.3583	8.53581	0.321948	0.892513	8.56118	53665.6	2040.69	2115.74	1.03678	1779.88	1600.75	0.899358	1.97461	0.725128	0.767008	0.490105	0.56355	0.693628	0.850432	1.17444	1.08839	1.11126	4143.73	24.1838	3309.31	30.7807
5310712	1	2015-11-09	2015-11-09	0	1	50	2019-02-18	1965-07-01	54	-1	67.8	170.5	23.3228	21.233	1.13649	25.8077	22.7084	1.0173	1.08726	4.90984	18.2138	7.96211	52948	17.4814	7.57049	0.324596	0.943609	7.99801	50818.8	2082.89	2129.19	1.02223	1837.61	1651.23	0.898571	1.94866	0.743394	0.776613	0.547757	0.503979	0.71588	0.870665	1.14864	1.09162	1.07216	4179.87	24.1756	3288.99	23.0466
5312532	1	2015-07-27	2015-07-27	0	1	50	2019-02-18	1964-10-13	54	-1	72	168.5	25.359	22.3525	1.30145	29.5705	22.7212	1.16888	1.20128	5.60243	19.4615	8.89076	55255.6	18.5771	8.41414	0.331801	0.942056	7.91716	52744.5	2123.11	2511.18	1.18279	1886.99	2006.37	1.06327	2.13794	0.835079	0.853994	0.653545	0.618568	1.04688	1.09363	1.36512	1.23927	1.264	3912.98	24.1404	3652.19	24.0351
5383241	1	2015-07-13	2015-07-13	0	2	9	2019-02-18	2006-05-30	13	-1	15	97	15.9422	35.757	0.869446	35.5778	40.9201	0.869898	0.794332	5.50293	9.88689	3.49898	9302.57	9.30617	3.28186	0.20586	0.193694	9.98645	8756.18	950.064	546.391	0.57511	750.176	323.541	0.431287	1.11488	0.290131	0.290048	0.430565	0.420908	0.488016	0.620012	0.51749	0.483557	0.459301	2366.62	24.744	400.343	47.2933
5512074	1	2015-05-25	2015-05-25	0	1	49	2019-02-18	1966-05-20	53	0	85.3	183	25.4711	21.8958	1.27212	28.0452	22.046	1.26264	1.33467	5.59276	19.9498	9.14412	66809.9	19.074	8.66102	0.340034	1.13874	9.15898	63876.9	2494.61	2933	1.17573	2253.71	2379.9	1.05599	2.296	0.842844	0.824887	0.569451	0.548866	0.857039	1.13052	1.41059	1.26034	1.25937	3988.77	23.8183	4296.99	20.7694
5534985	1	2016-05-18	2016-05-18	0	1	49	2019-02-18	1966-12-22	52	0	72	169	25.2092	20.3176	1.20158	23.5888	19.6315	1.14519	1.2152	5.10341	20.0148	8.91955	57164.3	19.1276	8.44196	0.334876	0.95644	7.06351	54630.5	2122.31	2533.87	1.19392	1870.66	1999.23	1.06873	2.12454	0.830685	0.835452	0.643519	0.671908	0.912965	1.0605	1.31308	1.29615	1.27313	3994.94	23.8976	3904.89	22.0225
5537181	1	2015-10-14	2015-10-14	0	1	47	2019-02-18	1968-08-16	51	0	72.9	182.5	21.8878	21.8317	1.08704	26.4938	24.3725	0.933085	0.917519	4.81239	17.2307	8.02263	57389	16.289	7.48489	0.341966	1.13896	9.33741	54252.5	2422.54	3136.5	1.29472	2167.71	2523.76	1.16426	2.40444	0.875609	0.900368	0.686103	0.68001	1.0333	1.21293	1.3702	1.4406	1.41467	4011.53	23.5175	3742.81	23.1552
5554790	1	2015-10-09	2015-10-09	0	1	54	2019-02-18	1961-10-04	57	-1	74.3	172.5	24.9695	22.0362	1.03555	23.9294	23.1078	1.01563	1.10303	5.41308	19.1514	8.24165	56987.3	18.3531	7.82819	0.31351	0.932887	8.22704	54611.9	2185.23	2375.4	1.08703	1908.89	1777.76	0.931305	2.16273	0.739672	0.718474	0.530318	0.592561	0.870565	0.948743	1.18947	1.10917	1.12024	4653.24	23.9018	3415.88	25.1094
5557899	1	2015-05-08	2015-05-08	0	1	36	2019-02-18	1978-07-25	41	-1	83.7	179	26.1228	23.8874	1.00536	24.6619	24.5303	1.10625	0.997063	6.17866	19.6871	9.66582	63079.6	18.6889	9.13972	0.349875	1.12104	8.73738	59881.1	2457.98	3198.45	1.30125	2191.2	2571.24	1.17344	2.351	0.895342	0.976484	0.753792	0.745865	0.891043	1.2864	1.50871	1.34826	1.45033	4399.93	23.7752	3851.74	27.4024
5571970	1	2016-09-23	2016-09-23	0	1	53	2019-02-18	1963-09-06	55	-1	68.8	173	22.9877	23.5266	1.11731	27.9471	25.0128	1.2633	1.27386	5.41067	17.5875	8.25015	52637.5	16.7912	7.80359	0.339467	1.01599	9.8335	50254.5	2146.6	2383.02	1.11014	1924.42	1977.62	1.02764	1.82463	0.692112	0.772612	0.608386	0.640846	0.871985	1.2123	1.37938	1.18006	1.23258	3382.48	24.1266	2625.69	26.2914
5586579	1	2016-09-01	2016-09-01	0	1	52	2019-02-18	1964-04-09	55	-1	68.4	166.5	24.6733	22.9535	1.04499	26.7765	25.6237	1.03842	1.11786	5.68936	19.0971	8.68103	52941.3	18.2059	8.21563	0.332976	0.923085	7.964	50470.9	2148.99	2470.44	1.14958	1892.16	1890.98	0.999375	2.25622	0.779896	0.806779	0.671161	0.710775	0.868441	1.00127	1.19971	1.19409	1.18778	4081	23.5944	3283.5	21.4611
5589210	1	2015-10-21	2015-10-21	0	1	51	2019-02-18	1964-07-16	55	0	52.3	163	19.6846	22.8574	1.15136	31.6657	27.5029	1.22665	1.20669	4.43385	14.964	6.74342	39757.9	14.2673	6.36791	0.323497	0.859499	10.1292	37906.8	1831.64	1851.17	1.01066	1575.21	1388.38	0.881391	1.80474	0.732795	0.764339	0.488584	0.477579	0.788738	0.886613	0.993155	1.0629	1.03724	3790.95	24.0041	2480.42	25.266
5613166	1	2015-09-22	2015-09-22	0	1	50	2019-02-18	1965-03-06	54	0	81	170	28.0277	25.3741	1.28338	33.828	26.3584	1.14583	1.20811	7.14823	21.0231	9.57733	60756.8	20.2161	9.16422	0.32697	0.944944	8.48779	58424.4	2109.17	2332.38	1.10583	1835.62	1776.33	0.967701	2.03271	0.745138	0.808975	0.617236	0.618175	0.848766	0.979467	1.18934	1.16246	1.15008	4546.88	24.229	4042.06	26.5464
5661531	1	2015-11-03	2015-11-03	0	1	37	2019-02-18	1977-11-08	41	-1	77.5	182	23.3969	18.2644	0.888943	19.6192	22.0703	0.85284	0.865392	4.23366	18.9462	8.88509	62757.5	17.9735	8.37348	0.357888	1.18547	6.66672	59535.3	2534.03	3222.2	1.27157	2282.38	2557.62	1.12059	2.64089	0.813833	0.902164	0.662539	0.673705	0.975224	1.18435	1.49251	1.30281	1.30485	4029.8	23.2934	3913.11	17.9457
5720506	1	2015-06-30	2015-06-30	0	1	46	2019-02-18	1968-10-13	50	-1	69.6	166.5	25.1062	25.6829	1.2333	32.4875	26.342	1.22855	1.25616	6.41965	18.5762	8.29508	51497.3	17.8722	7.93372	0.316007	0.876042	9.53197	49545.9	1896.94	1951.44	1.02873	1658.83	1472.57	0.887717	2.01109	0.73616	0.745616	0.495881	0.526641	0.869051	0.973245	1.08047	1.05968	1.04902	4015.66	24.4478	3546.93	28.1667
5720514	1	2015-06-24	2015-06-24	0	1	58	2019-02-18	1957-02-06	62	-1	77.8	176	25.1162	23.2295	1.24156	28.5831	23.0219	1.17939	1.18122	5.83398	19.2805	8.99465	59723.3	18.4322	8.54089	0.340055	1.05335	8.94959	57095.6	2308.66	2627.74	1.13821	2064.58	2005.01	0.971148	2.55128	0.817315	0.814136	0.572301	0.606774	0.810135	0.922251	1.31277	1.14442	1.11706	4065.26	23.6038	3880.83	24.4052
5720529	1	2016-05-05	2016-05-05	0	1	54	2019-02-18	1962-12-13	56	-1	61.3	161	23.6488	23.848	1.17402	26.9842	22.9844	0.914783	1.03348	5.593	17.8597	7.58378	46294.2	17.1978	7.23003	0.305725	0.792471	8.12992	44578.4	1832.44	1715.84	0.936371	1615.82	1320.01	0.816925	1.82739	0.669896	0.710354	0.515066	0.467356	0.690067	0.752299	0.908273	1.01098	0.99802	3384.03	24.1979	2716.41	27.9492
5720531	1	2015-06-04	2015-06-04	0	1	47	2019-02-18	1968-05-28	51	-1	73	169	25.5593	22.0398	1.04916	24.6407	23.4862	1.05373	1.03517	5.47953	19.3825	8.9747	55358.2	18.5822	8.53853	0.334067	0.954129	7.41514	53072.6	2059	2285.63	1.11007	1804.17	1794.68	0.99474	1.92653	0.731933	0.807582	0.542354	0.55198	0.725196	0.914246	1.25102	1.25657	1.30193	4101.94	24.0904	3268.46	24.8223
5720540	1	2015-04-09	2015-04-09	0	1	42	2019-02-18	1972-06-23	47	-1	72	168	25.5102	25.003	1.10535	29.9912	27.1328	1.01964	0.98156	6.34403	19.0291	8.89084	53707.6	18.1822	8.44824	0.331171	0.934697	8.35712	51317.4	2046.26	2390.19	1.16808	1813.72	1849.32	1.01962	2.32594	0.75302	0.824541	0.616339	0.613184	0.861786	1.10355	1.42654	1.19697	1.21653	3770.59	23.7418	3322.61	28.3771
5720551	1	2015-10-22	2015-10-22	0	1	49	2019-02-18	1966-03-28	53	-1	84	170	29.0657	21.1784	1.18158	24.978	21.1395	1.08015	1.03933	6.15517	22.9082	10.9777	66204.8	21.8887	10.4176	0.358414	1.03582	6.00402	63258.3	2345.3	2946.49	1.25634	2115.15	2406.89	1.13793	2.34456	0.818542	0.894568	0.605196	0.633335	1.05205	1.1697	1.49463	1.39983	1.31594	3899.65	23.7642	4148.84	23.1479
5720553	1	2015-06-26	2015-06-26	0	1	54	2019-02-18	1961-06-11	58	0	65.6	167.5	23.3816	24.6278	1.40695	33.7763	24.0067	1.4386	1.60067	5.72665	17.5261	7.83517	49171.8	16.805	7.46029	0.319067	0.895181	10.5457	47148.5	1974.59	2023.26	1.02465	1734.48	1589.55	0.91644	1.80636	0.771349	0.775549	0.595714	0.622141	0.794469	0.995478	1.1801	1.06224	1.06366	3670.66	24.2677	3051.17	24.9941
5720557	1	2016-06-02	2016-06-02	0	1	51	2019-02-18	1964-09-29	54	-1	78.6	172.5	26.4146	25.2654	1.23087	30.8781	25.0865	1.02923	1.16423	6.70494	19.8331	8.57901	59015.9	19.0001	8.15002	0.308542	0.918105	9.32814	56537	2073.73	2478.9	1.19538	1826.86	1859.12	1.01766	2.51053	0.837556	0.842027	0.617547	0.571736	0.910049	0.885978	1.5079	1.16323	1.18352	4341.5	23.8276	3475.36	27.3208
5720576	1	2015-05-26	2015-05-26	0	1	54	2019-02-18	1960-09-10	58	-1	73.8	172	24.9459	25.3311	1.22786	31.2451	25.4468	1.05037	1.17655	6.27795	18.5056	8.08283	54747	17.6305	7.60678	0.304931	0.902107	10.0648	52157.9	2227.83	2589.06	1.16214	1980.56	2031.75	1.02584	2.25385	0.838812	0.831008	0.650899	0.600958	0.91751	1.05332	1.25925	1.22608	1.22232	4044.86	23.8821	3786.89	26.0982
5720577	1	2015-04-17	2015-04-17	0	1	57	2019-02-18	1958-08-20	61	0	68	170	23.5294	21.9474	1.13162	27.1877	24.0255	1.06584	1.17276	5.16224	18.3588	8.12139	53056.8	17.5673	7.68846	0.32676	0.944336	8.40879	50769.5	2019.98	2287.29	1.13234	1785.05	1755.68	0.983543	2.2629	0.813783	0.820352	0.602055	0.60025	0.911116	0.896964	1.08543	1.16569	1.23407	3972.52	23.849	3522.04	21.0172
5720578	1	2015-06-12	2015-06-12	0	1	49	2019-02-18	1966-12-02	52	-1	60	165	22.0386	17.3744	0.953935	19.2994	20.2314	0.856604	0.841188	3.96488	18.8554	8.65226	51333.9	18.1561	8.29162	0.376232	1.02429	5.07407	49429.9	1983.75	1903.97	0.959784	1726.12	1411.23	0.817572	1.91263	0.694373	0.698748	0.541133	0.497483	0.684629	0.755808	0.975425	0.963421	0.968067	3675.62	23.8575	3420.74	19.7144
5720580	1	2015-04-21	2015-04-21	0	1	50	2019-02-18	1965-08-12	54	-1	87	174	28.7356	25.6634	1.23646	32.6769	26.4277	1.20626	1.2623	7.68648	22.2647	10.3889	67408.5	21.3655	9.92499	0.34539	1.0457	8.5223	64686.2	2281.98	2722.28	1.19294	2014.8	2046.55	1.01576	2.52912	0.810614	0.857666	0.630552	0.691217	0.941437	1.01632	1.29377	1.20358	1.17061	4445.37	23.6669	3870.34	25.8156
5720587	1	2015-06-02	2015-06-02	0	1	52	2019-02-18	1963-05-27	56	0	91.5	178	28.8789	24.6701	1.26096	29.9013	23.7132	1.16378	1.13709	7.13333	21.7815	10.0204	69012.6	20.9233	9.55622	0.330906	1.04844	8.50705	66293.5	2309.46	2719.12	1.17738	2054.62	2120.63	1.03213	2.34851	0.861682	0.816964	0.595957	0.62223	1.00674	1.09277	1.38816	1.15601	1.19637	4897.58	24.6994	5200.29	26.2328
5721706	1	2015-07-21	2015-07-21	0	1	52	2019-02-18	1963-01-11	56	-1	66.3	176	21.4037	23.3416	0.888883	22.5115	25.3256	0.952054	1.04051	5.0267	16.5087	7.14196	51137.3	15.7146	6.73125	0.31449	0.974166	10.3577	48677.5	2160.54	2459.77	1.1385	1937.16	1943.43	1.00324	2.31147	0.736409	0.797324	0.635471	0.683637	0.99666	1.10278	1.35509	1.12385	1.18167	3707.05	23.7679	3078.98	27.553
5721711	1	2015-08-18	2015-08-18	0	1	45	2019-02-18	1970-09-26	48	-1	57	184	16.836	15.0819	1.01009	16.8076	16.6396	0.936109	1.01423	2.51023	14.1337	6.2608	47851.2	13.4985	5.93097	0.352279	1.19267	7.9161	45700.6	2165.32	2150.57	0.99319	1914.86	1680.54	0.877633	1.87668	0.680391	0.699431	0.530864	0.526691	0.874837	1.02756	1.00186	1.01863	1.0539	3498.06	23.8297	2702.39	15.2842
5721713	1	2016-09-12	2016-09-12	0	1	58	2019-02-18	1958-02-12	61	0	74	174.5	24.3019	21.8778	1.15002	25.8587	22.4855	0.923292	0.962816	5.28847	18.8843	8.36508	57503.2	18.0012	7.88806	0.324586	0.988371	7.95983	54814.2	2252.52	2689.03	1.19379	2001.27	2183.2	1.09091	2.01322	0.821031	0.849757	0.681674	0.634236	1.07013	1.19149	1.39055	1.24384	1.28031	4033.26	24.0498	3953.73	25.0551
5721715	1	2015-07-31	2015-07-31	0	1	52	2019-02-18	1963-09-11	55	-1	84.9	171.5	28.8655	27.9269	1.26124	33.0401	26.1965	1.12915	1.24632	8.07258	20.8335	8.97739	61276.1	20.0256	8.58373	0.29737	0.874631	9.94722	58899.7	2125.1	2376.39	1.11825	1859.11	1765.78	0.949798	2.29562	0.753647	0.782589	0.587769	0.562118	0.96634	1.0789	1.23398	1.12531	1.13077	4701.5	24.1903	3783.09	32.3201
5721719	1	2015-10-15	2015-10-15	0	1	52	2019-02-18	1963-08-22	56	-1	92.2	170	31.9031	30.0302	1.07905	31.3496	29.0531	1.04557	1.05264	9.52032	22.1822	10.265	64106.4	21.2752	9.80034	0.307191	0.887781	9.08186	61485.2	2270.04	2621.2	1.15469	2029.14	2043.49	1.00707	2.39812	0.814175	0.858452	0.594093	0.602993	0.932098	1.05799	1.32252	1.18309	1.20496	4390.69	24.6433	4168.95	31.4707
5721720	1	2016-08-10	2016-08-10	0	1	51	2019-02-18	1965-04-29	54	0	102.6	178	32.3823	26.4619	1.5491	35.5855	22.9717	1.37575	1.43265	8.58006	23.8442	10.9804	75547.9	23.0231	10.5158	0.32474	1.02891	8.85973	72946.3	2426.52	2601.64	1.07217	2185.23	2162.4	0.989554	1.82034	0.765499	0.80251	0.563706	0.53129	0.830254	1.00496	1.34986	1.21636	1.20304	4376.73	24.9335	4571.8	29.0158
5721728	1	2015-06-29	2015-06-29	0	1	52	2019-02-18	1963-10-27	55	0	79.6	172	26.9064	19.703	1.17913	25.0125	21.2126	1.12231	1.08133	5.26953	21.4753	9.97265	63532.5	20.4841	9.44206	0.350922	1.03817	6.24284	60600.3	2205.53	2932.2	1.32948	1950.7	2342.12	1.20066	2.31555	0.847006	0.938922	0.648083	0.704101	1.02806	1.27986	1.61985	1.42426	1.4457	4326.25	23.9643	3711.31	22.7822
5721730	1	2015-09-24	2015-09-24	0	1	43	2019-02-18	1972-01-28	47	-1	72.7	172	24.5741	23.0806	1.05052	26.3617	25.094	0.907326	0.903781	5.67559	18.9148	8.67825	55957.4	18.0131	8.19897	0.333643	0.987048	7.91185	53289.9	2293.53	2667.53	1.16307	2039.49	2137.09	1.04786	2.088	0.77009	0.818527	0.56569	0.617678	0.942098	1.14112	1.36929	1.24477	1.20787	4050.41	23.8831	3173.92	25.5361
5721731	1	2015-09-11	2015-09-11	0	1	57	2019-02-18	1958-05-20	61	-1	64.7	168.5	22.7879	25.5612	1.05945	28.8606	27.2411	0.909237	1.13751	5.76904	16.8005	6.82728	47700.4	16.0541	6.46703	0.283792	0.805749	10.908	45581.3	2059.8	2119.12	1.0288	1816.91	1502.17	0.826772	2.54004	0.692087	0.737052	0.508868	0.522184	0.71447	0.858527	1.06928	0.974746	0.971354	3827.95	23.3614	2755.24	25.7335
5721733	1	2015-10-16	2015-10-16	0	1	52	2019-02-18	1963-04-09	56	-1	75.2	170.5	25.8684	28.3348	1.19452	33.0339	27.6546	1.12674	1.20328	7.18258	18.1664	7.85906	52810.1	17.5543	7.53323	0.291214	0.846566	11.2281	51030.7	1957.86	1779.48	0.908889	1705.81	1383.02	0.810771	1.57293	0.6644	0.68297	0.446395	0.478098	0.754404	0.809618	1.03301	0.995512	0.96643	3887.05	24.8586	3301.45	33.5844
5721736	1	2015-09-14	2015-09-14	0	1	56	2019-02-18	1959-05-21	60	-1	89.1	172.5	29.9433	32.2047	1.29304	40.4354	31.2717	1.10055	1.24201	9.67813	20.3738	9.15616	60624.7	19.5432	8.69577	0.290408	0.864145	11.6877	58153.1	2238.18	2471.56	1.10427	1999.27	2004.69	1.00271	1.9542	0.767811	0.808417	0.589891	0.609953	0.885094	1.03785	1.31263	1.18804	1.23551	4062.14	24.8953	3810.15	32.7492
5721738	1	2015-09-22	2015-09-22	0	1	47	2019-02-18	1968-07-16	51	-1	71	168	25.1559	22.6531	1.17675	28.24	23.9984	1.06613	1.04598	5.63395	19.2366	8.9104	54293.4	18.3178	8.45261	0.336009	0.948352	7.64548	51700	2145.01	2593.35	1.20902	1903.71	2034.67	1.06879	2.31529	0.793604	0.839501	0.635831	0.669395	1.04679	1.24216	1.50927	1.17887	1.20094	3769.1	23.5523	3329.93	26.0936
5721740	1	2015-10-23	2015-10-23	0	1	40	2019-02-18	1975-11-27	43	-1	58	160	22.6562	23.09	1.10998	27.3005	24.5956	1.08653	1.03622	5.05532	16.8387	7.47665	43107	16.1128	7.09671	0.313234	0.80188	8.2534	41248.9	1769.92	1858.15	1.04985	1525.04	1384.05	0.907551	1.93604	0.738956	0.76169	0.532576	0.526118	0.728322	0.910295	1.23434	1.05852	1.08481	3867.28	24.0408	2806.52	29.1079
5721742	1	2015-10-09	2015-10-09	0	1	41	2019-02-18	1974-07-28	45	-1	58.7	162.5	22.2296	22.3304	0.905622	24.4786	27.0296	0.843042	0.940011	4.93766	17.1741	7.23075	45350.5	16.3613	6.83132	0.307308	0.811485	7.92011	43203.9	1923.22	2146.52	1.11611	1654.85	1524.22	0.921065	2.31876	0.776072	0.810212	0.592488	0.568391	0.777035	0.925919	1.20886	1.04051	1.06824	4124.92	23.5133	2672.53	25.4314
5721746	1	2015-07-24	2015-07-24	0	1	55	2019-02-18	1960-12-23	58	-1	80.6	175	26.3184	24.6021	1.25582	29.412	23.4205	1.21645	1.38512	6.40922	19.6422	8.55325	60154.3	18.7841	8.08992	0.307387	0.941372	9.91356	57526.2	2387.5	2628.17	1.1008	2146.6	2131.01	0.992737	2.06374	0.780093	0.750101	0.572866	0.614473	0.870937	0.964523	1.29305	1.25577	1.20485	3802.24	24.0485	3263.1	27.769
5721748	1	2015-05-26	2015-05-26	0	1	57	2019-02-18	1958-05-28	61	-1	67.4	160.5	26.1643	27.6539	1.27827	32.5861	25.4923	1.18665	1.28254	7.19069	18.8118	8.24213	48459.6	18.0703	7.85677	0.300285	0.773543	9.62637	46549.5	1881.01	1910.12	1.01547	1651.26	1454.79	0.881019	1.98183	0.760106	0.743706	0.514961	0.508995	0.820041	0.838431	1.08727	1.0753	1.05852	3861.73	24.3012	2920.1	31.1626
5721749	1	2015-04-02	2015-04-02	0	1	50	2019-02-18	1965-10-11	53	0	62	170	21.4533	20.5747	1.06527	22.8545	21.4542	0.959644	0.998364	4.45013	17.179	7.70917	49647.2	16.5371	7.35674	0.342919	0.991036	7.75967	47792.4	1985.74	1854.86	0.934092	1718.95	1470.66	0.855553	1.44014	0.687429	0.740376	0.588978	0.528039	0.671606	0.822676	1.04771	1.01867	1.02744	3678.23	24.4277	2737.61	22.2032
5721750	1	2015-09-29	2015-09-29	0	1	44	2019-02-18	1971-08-06	48	-1	57.2	164	21.2671	22.99	1.0374	25.6921	24.7659	1.1282	1.04468	4.85047	16.2477	7.55049	43699.9	15.4974	7.14461	0.335947	0.903562	8.86639	41681.8	1831.64	2018.11	1.10181	1593.92	1488.81	0.934054	2.22662	0.73131	0.7424	0.50286	0.525475	0.817244	0.836847	1.03264	1.17642	1.16606	3613.83	23.6518	2553.85	27.2634
5721758	1	2015-10-16	2015-10-16	0	1	52	2019-02-18	1963-01-25	56	-1	90	171	30.7787	27.7093	1.12166	31.6401	28.2084	1.09576	1.17267	8.93434	23.3087	10.5121	68157.1	22.4015	10.0548	0.32668	0.955246	8.38679	65504.3	2268.05	2652.8	1.16964	2015.6	2048.82	1.01648	2.39249	0.821502	0.845429	0.608686	0.597331	1.09279	1.01853	1.56351	1.18418	1.15402	4561.05	24.171	4624.19	28.9296
5721760	1	2015-04-15	2015-04-15	0	1	52	2019-02-18	1963-09-17	55	0	67.9	172	22.9516	26.6177	1.28023	35.2722	27.5515	1.07351	1.00594	6.11005	16.8448	8.08155	49833.7	16.1734	7.66657	0.334032	0.9882	10.6473	47847.5	1994.1	1986.17	0.996024	1756.78	1610.49	0.916728	1.58303	0.744717	0.739293	0.497556	0.484632	0.754299	0.802957	1.00826	1.14446	1.13402	3731.15	24.5068	3378.6	27.9823
5721765	1	2016-06-16	2016-06-16	0	1	45	2019-02-18	1971-04-05	48	-1	79	180	24.3827	21.6729	1.3016	27.9991	21.5112	1.20735	1.15595	5.34918	19.3322	9.19771	62636.5	18.4128	8.69809	0.356732	1.15581	8.57839	59657.3	2460.77	2979.14	1.21065	2185.62	2377.71	1.08789	2.18586	0.837296	0.87696	0.657208	0.689472	0.957821	1.10026	1.45067	1.26692	1.22121	3951.26	23.4846	3755.48	23.2395
5721769	1	2015-04-15	2015-04-15	0	1	45	2019-02-18	1970-06-06	49	-1	70	170	24.2215	23.3228	1.16757	29.5934	25.3461	0.972864	1.02631	5.66791	18.6341	8.36193	53852.6	17.7542	7.90169	0.326227	0.942796	8.39681	51309.5	2017.99	2543.05	1.26019	1782.26	1928.18	1.08187	2.60844	0.819758	0.846416	0.65343	0.680094	0.966766	1.20637	1.25958	1.30311	1.30769	3835.97	23.3874	3537.67	26.1657
5721770	1	2015-11-11	2015-11-11	0	1	35	2019-02-18	1980-10-31	38	-1	84.3	179.5	26.1637	26.7821	1.28064	32.7995	25.6118	1.18604	1.27957	7.03296	19.227	8.7072	61949.8	18.3937	8.25093	0.315358	1.01609	11.1863	59264.9	2291.54	2684.89	1.17165	2049.45	2149.06	1.0486	2.21331	0.822	0.849117	0.639779	0.618729	0.818249	0.976786	1.25824	1.35542	1.2709	3953.97	23.9667	3307.72	28.0769
5721773	1	2015-10-15	2015-10-15	0	1	45	2019-02-18	1970-05-09	49	-1	62.6	169	21.918	21.4228	1.23462	25.3259	20.5131	1.03443	1.10802	4.68598	17.1878	7.4008	49090.2	16.3788	7.02041	0.320303	0.914818	8.59847	46779.4	1946.71	2310.8	1.18703	1699.44	1621.75	0.954282	2.78664	0.778869	0.785092	0.615227	0.545133	0.805302	0.988622	1.26689	1.13031	1.14025	4252.61	23.4094	3245.21	24.1051
5721776	1	2016-09-08	2016-09-08	0	1	51	2019-02-18	1965-06-26	54	-1	78	177.5	24.757	29.0563	1.26605	34.9238	27.5849	1.13207	1.31954	7.27268	17.7569	7.61718	55945.4	17.0945	7.25289	0.292963	0.923017	13.3253	53858.4	2113.55	2087.06	0.987467	1853.14	1670.5	0.90144	1.59965	0.716011	0.766329	0.51272	0.537001	0.799276	0.855041	1.16875	1.07749	1.10116	4324.68	24.8276	3161	31.6618
5721777	1	2016-09-08	2016-09-08	0	1	54	2019-02-18	1962-06-12	57	-1	74.3	167.5	26.4825	26.1134	1.15871	31.2163	26.9407	1.10659	1.15489	7.04008	19.9196	9.06963	55886.8	19.1594	8.66638	0.327249	0.918138	8.81547	53754	2084.88	2132.85	1.02301	1847.57	1654.63	0.895572	2.01512	0.707228	0.727585	0.538314	0.493265	0.816375	0.957784	1.01668	1.14822	1.08314	3993.96	24.3607	3366.24	27.0905
5721780	1	2015-07-23	2015-07-23	0	1	52	2019-02-18	1963-05-27	56	0	73.8	179	23.033	25.8995	1.21829	30.8404	25.3146	1.04753	1.19014	6.01839	17.2191	7.41887	55171.7	16.5805	7.09033	0.307834	0.986329	11.911	53125.7	2074.93	2046.06	0.986086	1828.06	1515.19	0.828852	2.15038	0.697136	0.729094	0.505033	0.506114	0.700782	0.775479	0.994959	1.01905	1.00032	4082.4	24.0135	3186.28	29.7265
5721782	1	2015-10-13	2015-10-13	0	1	55	2019-02-18	1960-03-09	59	-1	95.6	169.5	33.275	31.7888	1.1364	35.8975	31.5887	1.03062	1.20417	10.4956	22.521	9.58695	64703.5	21.6819	9.11032	0.273789	0.786601	10.1594	62292.7	2228.63	2410.86	1.08177	2000.87	1970.97	0.985058	1.93136	0.773604	0.799365	0.608132	0.626641	0.849413	0.947154	1.25156	1.2321	1.21426	4063.34	25.1028	4041.6	34.0173
5721784	1	2015-09-28	2015-09-28	0	1	50	2019-02-18	1965-10-28	53	-1	57.4	172	19.4024	20.7339	0.854918	21.899	25.6153	0.821228	0.746022	4.0447	15.463	7.19476	45745.7	14.8148	6.8557	0.353343	1.04533	7.8571	43828.2	1962.64	1917.56	0.977031	1701.43	1444.81	0.849169	1.80988	0.639623	0.663949	0.501953	0.537077	0.707515	0.862396	1.05326	1.02834	1.01479	3778.72	23.9553	2828.07	24.2884
5721793	1	2016-08-17	2016-08-17	0	1	49	2019-02-18	1967-09-06	51	-1	68.5	169.5	23.8425	24.115	1.40335	31.6782	22.5732	1.10169	1.18628	5.72973	18.0302	7.82356	51801.3	17.2845	7.43378	0.311787	0.895773	9.43971	49658.7	1958.66	2142.57	1.0939	1739.66	1665.17	0.957179	2.17994	0.764918	0.808335	0.628592	0.536033	0.851797	1.01603	1.22499	1.11981	1.11183	3565.44	23.8942	2996.82	29.4043
5723229	1	2016-07-04	2016-07-04	0	1	43	2019-02-18	1972-08-27	47	-1	78.2	170.5	26.9004	25.9988	1.39006	33.499	24.099	1.18662	1.29859	6.90578	19.6561	8.75925	57140.9	18.8834	8.33594	0.309882	0.900835	9.64504	54894.6	2115.54	2246.3	1.06181	1881.81	1791.99	0.95227	1.94372	0.733595	0.795935	0.480558	0.532861	0.765413	0.909654	1.28841	1.1453	1.14878	3822.68	24.2768	3637.05	29.0698
5730507	1	2015-07-01	2015-07-01	0	1	43	2019-02-18	1972-05-09	47	-1	78.5	173	26.2287	20.4308	1.40928	26.4348	18.7577	1.24782	1.16755	5.38249	20.9625	9.71786	62738.5	20.0393	9.21573	0.35136	1.05158	6.94213	59975.7	2224.65	2762.88	1.24194	1967.82	2134.14	1.08452	2.4481	0.785666	0.806438	0.561991	0.583639	0.919757	1.05394	1.28784	1.35231	1.36486	4593.04	23.8808	4067.59	23.3956
5730510	1	2015-07-29	2015-07-29	0	1	52	2019-02-18	1962-12-23	56	-1	69	166	25.0399	24.2608	1.36809	32.6323	23.8524	1.39208	1.35624	6.12077	19.1083	8.79554	52654.8	18.1812	8.32093	0.332306	0.915704	8.93578	50100	2164.52	2554.78	1.1803	1907.29	1905.37	0.998994	2.52463	0.796149	0.779444	0.651673	0.603437	0.901361	1.07934	1.27237	1.16742	1.221	4140.7	23.6147	3379.76	26.4627
5730513	1	2015-09-16	2015-09-16	0	1	47	2019-02-18	1967-11-23	51	-1	80.3	171.5	27.3015	26.2342	1.03546	28.0593	27.0983	1.00864	1.06356	7.12218	20.0262	8.93093	58901.7	19.1731	8.49091	0.311005	0.914735	9.09277	56392.4	2183.23	2509.3	1.14935	1922.82	1944.08	1.01106	2.1705	0.764406	0.808531	0.585153	0.586005	0.866911	1.02025	1.38609	1.14064	1.21849	4278.18	24.2038	3592.26	29.1479
5730521	1	2015-06-12	2015-06-12	0	1	49	2019-02-18	1966-02-16	53	-1	69.3	165.5	25.301	20.8413	1.4973	28.196	18.8313	1.16867	1.26964	5.28495	20.0731	9.02152	54980.8	19.4256	8.68138	0.343124	0.939826	6.91213	53207.2	1832.44	1773.64	0.967914	1581.98	1319.51	0.83409	1.8132	0.701853	0.717996	0.505447	0.507896	0.702231	0.767	0.965115	1.00908	1.03297	3860.22	24.1737	2962.37	22.582
5730528	1	2015-05-12	2015-05-12	0	1	48	2019-02-18	1967-05-15	52	-1	78.1	171.5	26.5536	23.5129	1.0524	26.203	24.8984	1.00366	1.0496	6.22687	20.2559	9.08742	59577.3	19.3875	8.60234	0.323962	0.952845	7.95226	57022.9	2262.07	2554.33	1.1292	2007.64	2012.68	1.00251	2.12883	0.762097	0.819822	0.565872	0.610444	0.870779	0.992068	1.23379	1.2157	1.27144	4048.94	23.8762	3646.85	26.373
5730532	1	2015-08-05	2015-08-05	0	1	46	2019-02-18	1969-04-02	50	-1	69.1	168	24.4827	21.3301	1.1811	26.6074	22.5277	1.09477	1.01781	5.19783	19.1707	9.03434	54107.5	18.4084	8.61515	0.351887	0.993166	7.05609	51955.8	1976.58	2151.69	1.08859	1739.26	1660.86	0.954922	2.06825	0.786899	0.79799	0.557735	0.576297	0.823471	1.00415	1.14763	1.09998	1.13562	4001.45	24.2186	3877	24.4863
5730540	1	2015-08-11	2015-08-11	0	1	46	2019-02-18	1968-10-13	50	-1	60.1	169	21.0427	20.2093	0.952561	23.6778	24.857	0.931912	0.998795	4.26404	16.8354	7.49751	48083.5	16.0407	7.08538	0.336715	0.961691	7.84764	45813.8	2034.31	2269.69	1.1157	1765.94	1648.6	0.933554	2.31427	0.810745	0.828223	0.510779	0.547254	0.760247	0.882687	1.12504	1.08788	1.12638	4093.65	23.4848	3071.78	19.7021
5730541	1	2015-09-07	2015-09-07	0	1	53	2019-02-18	1962-01-03	57	-1	67.3	171	23.0156	25.2298	1.26955	31.0162	24.4309	1.25629	1.3416	5.80769	17.2115	7.91498	50328	16.3884	7.48229	0.325096	0.950614	10.8767	47921.3	2130.67	2406.74	1.12957	1888.98	1852.66	0.980775	2.29246	0.762492	0.804415	0.549762	0.592266	0.88173	1.03819	1.29073	1.17941	1.15201	3624.5	23.6763	3444.38	24.4475
5730542	1	2015-07-08	2015-07-08	0	1	54	2019-02-18	1960-10-24	58	0	73.1	175	23.8694	22.2637	1.22247	29.0226	23.7409	1.27089	1.31156	5.27529	18.4193	8.45901	56409.1	17.7169	8.07809	0.338429	1.03644	9.16143	54258.1	2010.03	2150.91	1.07009	1780.27	1649.37	0.926468	2.18298	0.761617	0.797953	0.601967	0.61446	0.781524	0.88176	1.2494	1.06596	1.05074	4011.14	24.147	3995.49	21.2833
5730545	1	2015-05-12	2015-05-12	0	1	51	2019-02-18	1964-01-01	55	0	63	168.5	22.1892	18.7517	1.1997	25.0793	20.9047	1.18357	1.08826	4.16054	18.027	8.58262	51182.6	17.257	8.17634	0.368484	1.04621	6.7847	48996.5	1998.08	2186.08	1.09409	1720.55	1601.47	0.93079	2.10646	0.770685	0.799169	0.579776	0.550421	0.813694	0.949923	1.07126	1.08027	1.08666	4497.9	23.9168	3334.9	18.8107
5730547	1	2015-09-07	2015-09-07	0	1	54	2019-02-18	1961-09-03	57	-1	87.6	174.5	28.7682	28.8836	1.19238	33.534	28.1236	1.12864	1.35558	8.33625	20.5253	8.46826	62499.9	19.7046	8.0582	0.280108	0.852935	11.2877	60000.9	2212.3	2499.01	1.1296	1959.85	1891.69	0.965218	2.40574	0.74091	0.77498	0.545438	0.593912	0.894988	1.08509	1.37676	1.11121	1.13781	4234.11	24.0919	3656.32	33.3098
5730549	1	2016-06-12	2016-06-12	0	1	53	2019-02-18	1963-12-16	55	-1	69.9	178	22.0616	22.0186	1.16135	27.5804	23.7486	0.996184	1.02208	4.81837	17.0648	7.41333	54068.2	16.3287	7.04375	0.319276	1.01159	9.52841	51735.8	2127.89	2332.46	1.09614	1863.1	1647.58	0.884323	2.58651	0.713944	0.748786	0.546987	0.519529	0.769225	0.796294	1.09324	1.10557	1.04094	4401.2	23.4334	3242.59	28.5503
5730550	1	2016-05-04	2016-05-04	0	1	46	2019-02-18	1969-12-16	49	-1	85.4	179.5	26.5051	25.3726	1.2648	33.8403	26.7554	1.08924	1.22011	6.73771	19.8174	8.53653	63852.1	18.8874	8.04144	0.303393	0.977539	10.3561	60855.7	2354.45	2996.38	1.27265	2104.79	2388.49	1.13479	2.43486	0.878785	0.932458	0.721555	0.676639	1.00319	1.23365	1.49965	1.30465	1.33765	4227.76	24.0391	4073.58	29.2565
5730559	1	2015-06-10	2015-06-10	0	1	56	2019-02-18	1958-11-23	60	0	65.8	166	23.8786	22.62	1.10275	27.8525	25.2573	0.979142	0.960183	5.44104	18.6131	8.33039	51290.2	17.6528	7.83178	0.327983	0.903789	7.69011	48644	2093.64	2646.15	1.2639	1844.78	1903.26	1.0317	2.9851	0.794713	0.794222	0.562226	0.554341	0.881172	0.988825	1.36274	1.30037	1.18927	4512.9	23.5642	3517.23	26.6078
5730561	1	2016-07-28	2016-07-28	0	1	53	2019-02-18	1963-06-25	56	-1	73.6	166	26.7092	21.8378	1.67241	29.057	17.3743	1.47021	1.61535	5.92866	21.22	9.29431	58473.8	20.4141	8.84849	0.331289	0.912901	7.60561	56253.1	2059.8	2220.71	1.07812	1818.5	1724.36	0.948232	2.05699	0.769702	0.784712	0.550582	0.531938	0.819782	0.840385	1.07776	1.19722	1.20625	4142.89	24.0425	3602.13	23.2502
5730566	1	2015-08-03	2015-08-03	0	1	53	2019-02-18	1962-12-19	56	-1	71.2	175	23.249	19.3433	1.33646	26.4173	19.7666	1.11531	1.25234	4.50459	18.783	8.11358	57523	17.8803	7.65121	0.329099	1.00787	7.84137	54758.4	2173.28	2764.63	1.2721	1931.19	2201.83	1.14015	2.3247	0.8365	0.910578	0.759714	0.742157	1.19569	1.52039	1.47294	1.26259	1.24822	4044.37	23.6087	3775.03	21.2282
5730568	1	2015-05-21	2015-05-21	0	1	53	2019-02-18	1961-09-01	58	-1	70.9	170	24.5329	27.038	1.15839	33.4386	28.8664	0.917869	0.890242	6.7293	18.159	8.17489	52479.6	17.2936	7.6839	0.313208	0.905172	9.67097	49978.4	2121.91	2501.23	1.17876	1851.15	1983.32	1.0714	1.91279	0.817745	0.818428	0.628478	0.636466	0.992245	1.19484	1.36546	1.29186	1.27242	4201.84	24.0388	3130.63	31.7095
5730570	1	2015-06-17	2015-06-17	0	1	57	2019-02-18	1958-02-02	61	-1	66.8	162	25.4534	26.3794	1.09738	28.8729	26.3109	1.25132	1.41118	6.7734	18.9034	8.08832	49610.1	18.1388	7.69777	0.302426	0.793686	9.65107	47603.5	1903.31	2006.58	1.05426	1671.97	1492.94	0.892922	2.22028	0.732682	0.770217	0.550087	0.526169	0.833283	0.810891	1.07127	1.06482	1.0653	3834.32	24.0462	2791.83	30.5592
5730577	1	2015-07-01	2015-07-01	0	1	40	2019-02-18	1974-08-02	45	-1	65	165	23.8751	25.0338	1.1147	30.7116	27.5515	0.955763	0.984627	6.30454	18.8796	8.07688	51399.6	17.9222	7.61555	0.318974	0.868408	8.55499	48793.3	2072.54	2606.34	1.25756	1806.55	1887.36	1.04473	2.70308	0.787463	0.817891	0.649378	0.627051	1.01524	1.19337	1.36811	1.19127	1.27609	4560.79	23.5807	2941.77	33.4918
5730579	1	2015-09-07	2015-09-07	0	1	46	2019-02-18	1968-10-08	50	-1	73.1	169	25.5943	25.0255	1.18044	32.4653	27.5028	1.13662	1.28154	6.36826	19.0788	8.41632	54491	18.2505	8.00235	0.312661	0.89299	9.49553	52125.2	2067.76	2365.87	1.14417	1802.57	1729.77	0.959614	2.39864	0.790204	0.808636	0.554717	0.575756	0.906481	0.937776	1.22798	1.15757	1.15935	4403.19	23.8243	3700.39	24.6295
5730580	1	2015-07-22	2015-07-22	0	1	55	2019-02-18	1960-01-26	59	-1	72.6	171	24.8282	20.4301	1.15123	24.1481	20.9759	1.03001	1.0294	5.08607	19.8089	8.93759	57923.1	18.9058	8.45554	0.340562	0.995839	6.91851	55282.4	2273.62	2640.74	1.16147	2019.58	2032.55	1.00642	2.39406	0.766527	0.786062	0.60293	0.606568	0.892331	1.01645	1.24004	1.2498	1.25845	4480.3	23.91	3853.14	22.5712
5730585	1	2015-07-29	2015-07-29	0	1	47	2019-02-18	1968-03-02	51	-1	73	163	27.4756	29.363	1.38816	37.3747	26.9239	1.16415	1.16118	8.05778	19.3842	8.65596	51501.8	18.5674	8.23781	0.299822	0.796598	9.93998	49331.7	2035.11	2170.03	1.06629	1785.85	1658.77	0.928844	2.05106	0.73714	0.782171	0.575611	0.585202	0.866208	0.862409	1.23395	1.09655	1.09429	4497.45	25.0628	2974.34	35.6124
5730588	1	2015-07-22	2015-07-22	0	1	56	2019-02-18	1958-11-19	60	-1	72.7	166	26.3826	22.0884	1.49001	29.1707	19.5775	1.34885	1.52287	5.84922	20.6317	8.84332	56852.7	19.7459	8.37579	0.317473	0.87483	7.86748	54411.8	2090.06	2440.89	1.16786	1852.35	1894.86	1.02295	2.29702	0.776231	0.815037	0.68346	0.747497	1.00044	1.12117	1.23549	1.21151	1.20207	3814.2	23.785	3566.44	24.3277
5730594	1	2015-06-11	2015-06-11	0	1	39	2019-02-18	1975-12-26	43	-1	79.6	177	25.4078	21.8779	1.29883	28.3295	21.8116	1.13123	1.08268	5.59325	19.9725	9.4494	62571.9	19.1368	8.99242	0.353924	1.10881	7.91145	59953.8	2227.43	2618.12	1.1754	1979.76	1994.13	1.00726	2.51945	0.779998	0.783493	0.59096	0.598257	0.749684	0.917756	1.18977	1.27066	1.24345	4377.47	23.7667	4193.52	24.4254
5730595	1	2016-08-29	2016-08-29	0	1	43	2019-02-18	1973-05-03	46	-1	85.7	166.5	30.9138	28.6781	1.25285	33.1977	26.4978	1.27568	1.26918	8.87313	22.0674	9.68346	61175.7	21.1138	9.15038	0.295997	0.820569	9.13525	58532.3	2187.61	2643.36	1.20833	1949.1	2164.17	1.11034	2.00908	0.782043	0.905347	0.618051	0.686988	0.962847	1.05689	1.44554	1.38505	1.37748	4308.85	24.8654	3675.24	37.0294
5730599	1	2015-05-11	2015-05-11	0	1	50	2019-02-18	1964-11-04	54	0	85	178	26.8274	25.0077	1.40168	32.3072	23.049	1.29426	1.3131	6.66409	19.984	9.31457	63317.4	19.1464	8.85033	0.329899	1.04525	9.85768	60663.5	2403.83	2653.94	1.10405	2143.81	2182.01	1.01781	1.81504	0.819557	0.847221	0.579818	0.599283	0.923668	1.11864	1.28005	1.20388	1.21967	4404.51	24.5698	4226.93	26.6829
5730600	1	2015-06-17	2015-06-17	0	1	37	2019-02-18	1978-08-08	41	-1	74	168	26.2188	23.1223	1.27382	27.8783	21.8856	1.26235	1.21403	6.25488	20.7964	9.69932	58695.8	19.8601	9.19801	0.350817	0.990146	7.57643	56053.3	2206.73	2642.57	1.19751	1963.84	2202.72	1.12164	1.8109	0.789829	0.837939	0.642684	0.672702	0.888345	1.2127	1.54043	1.3856	1.337	3856.2	24.215	3454.73	26.6599
5730703	1	2015-06-08	2015-06-08	0	1	41	2019-02-18	1973-10-23	45	-1	69.5	165.5	25.374	22.985	1.12564	26.0188	23.1146	0.991029	0.978424	5.82801	19.5277	8.93098	53486.9	18.7632	8.49787	0.334905	0.917312	7.23089	51392.8	2073.73	2094.1	1.00982	1834.03	1638.56	0.893422	1.90039	0.731289	0.782677	0.513053	0.513675	0.734953	0.914553	1.09483	1.06046	1.09378	3802.48	24.1768	3411.88	25.7566
5730704	1	2015-06-17	2015-06-17	0	1	57	2019-02-18	1957-11-04	61	-1	58	166	21.048	20.498	0.956937	23.7559	24.8249	1.03361	1.04068	4.36762	16.9399	7.77873	46679.7	16.0216	7.26841	0.345325	0.951577	7.74978	44149.1	2076.52	2530.58	1.21867	1838.41	1971.62	1.07246	2.34749	0.865136	0.891232	0.567555	0.616473	0.881474	1.09634	1.32719	1.31259	1.31375	3430.55	23.3459	3102.2	22.1633
5730710	1	2015-04-15	2015-04-15	0	1	58	2019-02-18	1957-11-29	61	0	80.4	177.5	25.5187	26.6162	1.17115	33.7935	28.8551	1.03863	0.950417	6.80987	18.7755	8.79815	59154.7	17.8874	8.31942	0.326012	1.02714	10.0956	56356.5	2205.13	2798.24	1.26897	1945.52	2099.9	1.07935	2.6899	0.823892	0.840564	0.583212	0.614575	0.834007	1.02245	1.38234	1.2772	1.38941	4585.48	23.7443	3865.05	32.3981
5730714	1	2015-07-01	2015-07-01	0	1	50	2019-02-18	1965-11-09	53	-1	79.1	173	26.4292	26.0392	1.23102	31.5228	25.6072	0.962212	1.04422	6.90316	19.6075	8.39013	58683.2	18.7986	7.96487	0.301366	0.901959	9.48784	56262.5	2205.53	2420.76	1.09758	1928	1852.92	0.961058	2.04602	0.769833	0.823494	0.570196	0.562364	0.851425	1.07289	1.16152	1.1517	1.14266	4555	24.4267	3454.04	30.8539
5730716	1	2016-09-13	2016-09-13	0	1	57	2019-02-18	1958-12-26	60	-1	71.2	168.5	25.0773	25.2256	1.29884	30.375	23.3863	1.2667	1.3741	6.34816	18.8174	8.31725	53426.8	18.0649	7.90924	0.315395	0.895477	9.80524	51290.3	2068.96	2136.47	1.03263	1809.74	1660.51	0.917541	1.83614	0.779931	0.81488	0.539017	0.549527	0.793834	0.843736	1.11538	1.11768	1.10735	4094.79	24.465	3301.29	26.5754
5730719	1	2015-05-13	2015-05-13	0	1	50	2019-02-18	1964-12-16	54	-1	57.5	156	23.6275	25.6268	1.31239	30.785	23.4573	1.35039	1.53305	5.97579	17.3427	7.19958	42205.2	16.6272	6.85073	0.289947	0.705615	9.88787	40463.9	1731.3	1741.32	1.00579	1490	1297.17	0.870582	1.84067	0.620139	0.707616	0.526316	0.585156	0.805891	0.86831	1.25068	0.971423	1.05199	3757.96	24.2962	2087.14	31.3474
5730722	1	2015-08-18	2015-08-18	0	1	51	2019-02-18	1964-04-25	55	0	69.6	159.5	27.3582	27.0955	1.30191	34.9813	26.8691	1.14847	1.29206	7.46949	20.0978	8.56545	51129.3	19.2737	8.14135	0.297583	0.757059	8.83936	49032.8	1884.6	2096.58	1.11248	1646.48	1532.27	0.930633	2.36991	0.768806	0.792365	0.556177	0.571171	0.799747	0.950163	1.13794	1.13115	1.14269	3955.7	23.8777	3029.7	29.9622
5730724	1	2016-06-15	2016-06-15	0	1	58	2019-02-18	1958-12-27	60	-1	67.1	171.5	22.8136	23.3037	1.21039	28.8526	23.8373	1.18685	1.19486	5.38908	17.7363	8.00252	52166.5	16.9818	7.59246	0.332804	0.978851	9.41582	49947.3	2090.46	2219.22	1.06159	1837.21	1776.23	0.966807	1.74924	0.751536	0.750631	0.563843	0.647972	0.90412	0.964242	1.17585	1.17727	1.1543	3848.08	24.2719	2971.45	27.1646
5730735	1	2015-05-28	2015-05-28	0	1	49	2019-02-18	1965-07-20	54	-1	66.7	171.5	22.6776	21.1619	0.992489	22.1918	22.3598	0.983306	1.00915	4.70723	17.5366	8.01503	51579.1	16.8065	7.63564	0.336704	0.990322	8.02607	49431.7	2023.17	2147.39	1.0614	1769.52	1629.15	0.920673	2.04318	0.728981	0.768457	0.574416	0.56876	0.768281	0.810368	1.06875	1.13406	1.10836	3937.27	23.8462	3049.04	21.1284
5730737	1	2015-06-09	2015-06-09	0	1	47	2019-02-18	1967-09-23	51	0	74.1	166.5	26.7294	20.1137	1.36548	26.7419	19.5842	1.13123	1.09546	5.35606	21.2728	9.70639	58973	20.3857	9.23839	0.345626	0.958153	6.08286	56513.7	2119.53	2459.24	1.16028	1861.11	1887.56	1.01421	2.21222	0.848032	0.84035	0.633902	0.58163	0.934178	1.05398	1.26275	1.22164	1.19488	4541.41	24.3592	4507.75	21.1532
5730739	1	2015-07-29	2015-07-29	0	1	51	2019-02-18	1964-10-08	54	0	72.7	176.5	23.337	25.0183	1.40307	34.2745	24.4282	1.25241	1.25178	5.88538	17.6389	8.03051	54949.2	16.8527	7.59929	0.325633	1.01442	10.9976	52499.9	2159.34	2449.27	1.13426	1912.47	1924.54	1.00631	2.1255	0.760142	0.816994	0.608847	0.54209	0.865685	1.06666	1.27613	1.23824	1.17679	4128.64	24.1713	2930.99	30.2727
5730740	1	2015-07-28	2015-07-28	0	1	48	2019-02-18	1966-10-13	52	-1	77	174.5	25.2871	21.8253	1.15838	26.8337	23.1648	1.14365	1.06745	5.54524	19.8622	9.54458	60480.9	18.9461	9.06695	0.35856	1.09182	7.69292	57691.3	2279.59	2789.58	1.22372	2029.14	2174.75	1.07176	2.45483	0.863205	0.875389	0.609784	0.646002	0.950042	1.15543	1.41306	1.27204	1.19891	4546.69	23.8215	3889.8	23.2945
5730741	1	2016-05-18	2016-05-18	0	1	54	2019-02-18	1962-08-21	57	-1	82.2	183	24.5454	25.8122	1.37633	32.9424	23.9349	1.26921	1.38855	6.37824	18.3319	8.05608	61391.7	17.5214	7.61649	0.310303	1.03917	12.347	58677.4	2398.65	2714.35	1.13162	2125.5	2118.78	0.996837	2.18038	0.790592	0.847313	0.568557	0.587447	0.912366	1.00667	1.26499	1.19199	1.18098	4976.73	24.207	3552.29	27.7994
5730750	1	2015-07-24	2015-07-24	0	1	58	2019-02-18	1957-03-18	62	0	69.2	165.5	25.2645	23.1792	1.19884	28.2104	23.5315	0.958201	1.15221	5.84224	19.3624	8.03143	53034.2	18.5171	7.61457	0.301394	0.825527	8.16345	50718.9	2044.67	2315.28	1.13235	1805.76	1696.83	0.939678	2.58865	0.789861	0.826117	0.596977	0.55147	0.923205	1.12272	1.17347	1.12559	1.03278	4282.41	23.7179	3024.94	26.2501
5730756	1	2015-08-12	2015-08-12	0	1	50	2019-02-18	1965-06-23	54	0	76	170	26.2976	25.0131	1.34195	29.902	22.2825	1.14286	1.21012	6.60463	19.8001	8.99331	57222.3	18.9439	8.51354	0.323739	0.935604	8.93196	54747.9	2128.68	2474.34	1.16238	1904.51	1983.72	1.04159	2.18855	0.830451	0.82146	0.623288	0.616776	0.88814	0.865312	1.29315	1.28474	1.25878	3807.33	24.0023	3775.96	26.2153
5730757	1	2015-10-21	2015-10-21	0	1	52	2019-02-18	1963-02-21	56	-1	68	164	25.2826	24.0354	1.43159	31.0761	21.7073	1.31878	1.37964	5.98301	18.9095	8.41543	50859	18.0665	7.99524	0.316235	0.850546	8.86388	48591.7	2008.43	2267.3	1.12889	1748.82	1660.78	0.94966	2.3362	0.80362	0.804719	0.564751	0.565916	0.931775	0.951678	1.16538	1.12372	1.13744	4368.78	23.8865	3046.31	26.4693
5730758	1	2015-07-01	2015-07-01	0	1	42	2019-02-18	1973-10-27	45	-1	75	170	25.9516	20.3741	1.15433	24.6708	21.3725	0.984792	0.892344	5.665	22.1399	10.3452	63984.3	21.2502	9.8919	0.381168	1.10157	5.63151	61413	2200.75	2571.3	1.16837	1928.8	1998.87	1.03633	2.10485	0.752041	0.813017	0.626756	0.611175	0.852531	1.17341	1.49059	1.2164	1.16662	4598.5	23.8448	4133.9	25.6471
5730760	1	2015-06-23	2015-06-23	0	1	58	2019-02-18	1957-03-18	62	-1	61.5	168	21.79	20.2476	0.738212	16.342	22.1373	0.779122	0.812912	4.35898	17.1694	7.79177	48458.9	16.2848	7.35166	0.337388	0.952243	6.9473	45962.3	2088.47	2496.59	1.19542	1849.96	1817.06	0.982218	2.84907	0.81768	0.816289	0.640367	0.638535	0.963405	0.969415	1.12538	1.11426	1.15281	3826.64	23.0605	3183.14	20.181
5730763	1	2015-07-15	2015-07-15	0	1	44	2019-02-18	1971-06-29	48	-1	71.6	170	24.7751	22.1894	1.1702	25.3302	21.646	1.21073	1.12767	5.54615	19.4485	8.88766	56206.1	18.5892	8.44902	0.341029	0.985574	7.84897	53722.8	2116.34	2483.27	1.17338	1855.53	1840.94	0.992139	2.46281	0.766419	0.775119	0.660467	0.665722	0.899534	1.12785	1.24206	1.12996	1.15137	4477.7	23.7541	3530.87	28.0386
5730768	1	2015-07-30	2015-07-30	0	1	55	2019-02-18	1960-06-09	59	-1	80.3	165	29.4949	26.7656	1.3665	33.3968	24.4397	1.27822	1.45885	7.89847	21.6113	9.47313	58836.8	20.6824	8.99668	0.305025	0.830429	8.88108	56307.8	2088.87	2528.99	1.2107	1844.78	1922.95	1.04238	2.48288	0.787591	0.898431	0.570755	0.624084	0.937218	1.05165	1.351	1.29329	1.24636	4294.04	24.233	3567.86	28.5024
5730771	1	2015-09-10	2015-09-10	0	1	43	2019-02-18	1972-07-16	47	-1	72	174	23.7812	23.0196	1.15096	28.136	24.4456	1.05354	1.07064	5.44164	18.1975	8.16263	55094.8	17.4561	7.77759	0.327048	0.99017	8.94575	52850.2	2154.57	2244.56	1.04177	1890.17	1674.91	0.886114	2.15458	0.738234	0.748278	0.527636	0.545498	0.764609	0.962689	1.06538	1.06127	1.04809	3972.38	23.7198	3401.62	26.3766
5730774	1	2015-09-25	2015-09-25	0	1	58	2019-02-18	1957-09-02	62	-1	73.5	172.5	24.7007	22.9004	0.838973	21.9225	26.1301	0.849067	0.806206	5.74933	19.3565	9.03778	57597.7	18.4653	8.52306	0.345054	1.02675	7.32269	54945.7	2371.97	2652	1.11806	2124.3	2098.98	0.98808	2.2329	0.765889	0.796486	0.582988	0.575463	0.844841	0.987368	1.05778	1.22954	1.23707	4144.37	24.0804	3622.53	24.6785
5730780	1	2015-07-21	2015-07-21	0	1	57	2019-02-18	1958-04-11	61	-1	58	171	19.8352	19.5369	0.97821	20.5101	20.9669	1.03356	1.16042	3.73177	15.3694	6.7044	44941.6	14.6725	6.33702	0.319484	0.934204	8.99534	42904	2002.46	2037.6	1.01755	1744.84	1522.86	0.872783	1.99801	0.751015	0.76244	0.484592	0.530116	0.781142	0.948053	1.04433	1.04485	1.03247	3631.99	23.6782	2770.49	19.6186
5730782	1	2015-09-18	2015-09-18	0	1	46	2019-02-18	1968-07-26	51	0	60.7	166	22.0279	25.6963	1.46198	33.4572	22.8849	1.56312	1.48167	5.62231	16.2575	7.43628	44799.3	15.5131	7.04459	0.319804	0.881251	11.4558	42747.8	1876.63	2051.47	1.09317	1647.68	1563.16	0.948702	2.1328	0.737489	0.734244	0.535803	0.57519	0.790423	0.953221	1.15834	1.16426	1.1928	3656.52	24.2036	2538	31.2368
5730783	1	2015-10-14	2015-10-14	0	1	39	2019-02-18	1976-11-23	42	-1	77	181	23.5036	22.9991	1.29276	28.9525	22.3958	1.2924	1.21394	5.40174	18.085	8.63381	59248.2	17.1743	8.12878	0.345853	1.13305	10.0951	56264.9	2402.63	2983.29	1.24167	2150.58	2459.16	1.14348	2.07945	0.843896	0.876187	0.656445	0.702412	0.991107	1.36969	1.47865	1.35322	1.33781	3999.28	23.994	3726.79	25.8425
5730785	1	2015-08-26	2015-08-26	0	1	51	2019-02-18	1964-05-03	55	-1	60.8	165	22.3324	25.6301	1.17472	32.8241	27.9421	1.04456	1.22636	5.80328	16.8392	7.07815	45844.7	16.1096	6.69986	0.300006	0.816766	10.6573	43858.3	1888.98	1986.39	1.05157	1640.51	1409.03	0.858895	2.32372	0.70158	0.745662	0.476816	0.517428	0.736036	0.755537	1.01071	1.05923	1.05503	4037.24	23.7027	2870.04	27.2259
5730788	1	2015-08-20	2015-08-20	0	1	58	2019-02-18	1957-07-29	62	0	59.7	169	20.9026	24.85	1.12299	29.6968	26.4445	1.17312	1.11889	5.17826	15.6598	7.25026	44726.1	14.9182	6.8851	0.329389	0.940769	10.8723	42607.9	2015.6	2118.17	1.05089	1772.71	1505.99	0.84954	2.52038	0.68751	0.733615	0.557165	0.580715	0.821776	0.881216	1.02997	0.952936	0.993151	3701.47	23.2873	2577.09	28.7493
5730789	1	2015-09-18	2015-09-18	0	1	51	2019-02-18	1964-07-24	55	-1	76.2	170.5	26.2124	23.0211	1.35513	29.9716	22.1171	1.34569	1.44898	6.06385	20.2765	9.20019	58944.3	19.3285	8.72629	0.332907	0.96777	8.53561	56188.4	2226.24	2755.89	1.23791	1985.74	2152.5	1.08398	2.5089	0.83301	0.919619	0.597039	0.67262	1.00753	1.28857	1.51372	1.23498	1.25474	4124.66	23.7113	3710.18	23.4928
5730792	1	2015-10-22	2015-10-22	0	1	43	2019-02-18	1972-06-21	47	-1	65	165	23.8751	22.5471	1.15374	28.8081	24.9693	1.0076	0.87956	5.22757	17.9575	8.56015	48889.3	17.1354	8.14706	0.341237	0.929016	7.3458	46651.1	1966.23	2238.2	1.13832	1701.43	1690.09	0.993333	2.06997	0.729393	0.732083	0.60226	0.613811	0.934331	1.11072	1.31136	1.16207	1.17463	4016.36	23.6772	3171.64	26.2154
5730795	1	2015-07-29	2015-07-29	0	1	50	2019-02-18	1964-08-20	55	0	76.2	178.5	23.9154	23.7309	1.40809	32.4946	23.0771	1.25241	1.12164	5.61622	18.05	8.62478	57511.4	17.2856	8.22502	0.343921	1.09581	9.84964	55075.7	2284.77	2435.63	1.06603	2019.98	1826.98	0.904455	2.2986	0.682121	0.7377	0.533528	0.485891	0.796289	0.912014	1.24481	1.05079	1.04763	4465.38	23.954	3270.16	29.0713
5730796	1	2015-07-27	2015-07-27	0	1	52	2019-02-18	1963-09-28	55	0	59.2	157.5	23.865	30.2291	1.2798	38.7656	30.2904	1.1537	1.27576	7.20533	16.6304	7.15708	41253.8	15.8053	6.74402	0.282591	0.701002	11.8684	39207	1802.97	2046.8	1.13524	1565.26	1508.67	0.963851	2.26374	0.740691	0.757856	0.589077	0.62499	0.909748	0.873378	1.17269	1.1545	1.21904	3916.23	23.9331	2502.4	33.7821
5730800	1	2015-10-15	2015-10-15	0	1	58	2019-02-18	1957-08-10	62	-1	62.8	161.5	24.0777	20.4272	1.27643	25.9737	20.3487	1.12186	1.37229	4.90643	19.1127	7.89682	49850.1	18.3652	7.51641	0.312173	0.814218	7.2284	47900.5	1890.97	1949.58	1.03099	1651.66	1470.4	0.890253	2.00236	0.701272	0.768147	0.501321	0.559537	0.900084	0.959239	1.10062	1.02553	1.06527	3606.7	23.8807	2999.51	22.2093
5730805	1	2015-07-13	2015-07-13	0	1	53	2019-02-18	1962-09-16	56	-1	79.7	176.5	25.584	20.3742	1.21096	23.7805	19.6377	1.13564	1.09179	5.20691	20.3495	9.57843	63393.2	19.63	9.17162	0.35849	1.11678	7.0985	61152	2138.24	2241.26	1.04818	1882.21	1753.12	0.931418	1.90655	0.770969	0.782785	0.531763	0.518996	0.89562	0.852302	0.99738	1.12342	1.14535	4082.18	24.1822	4678.91	21.2414
5730807	1	2015-09-28	2015-09-28	0	1	55	2019-02-18	1960-05-17	59	-1	72	173	24.0569	19.9647	1.03131	23.8286	23.1051	1.05577	1.03425	4.88098	19.5671	9.04933	58562.2	18.665	8.52202	0.354244	1.06022	6.9807	55862.4	2201.15	2699.88	1.22657	1959.06	2109.04	1.07656	2.4405	0.974387	0.876529	0.572144	0.596743	0.849917	0.877892	1.17776	1.343	1.2955	4226.42	23.6717	4033.47	22.6708
5730821	1	2015-09-23	2015-09-23	0	1	52	2019-02-18	1963-04-30	56	-1	67.6	168	23.9512	22.8563	1.08409	27.2528	25.139	0.951261	1.0561	5.45755	18.4201	8.06181	51989	17.5257	7.60347	0.317456	0.895989	8.32242	49464.6	2141.82	2524.36	1.17861	1890.97	1850.16	0.978417	2.68765	0.827787	0.843805	0.663137	0.595331	0.78776	0.879068	1.17092	1.15707	1.18057	4015.81	23.2088	3601.14	22.8373
5730828	1	2015-09-25	2015-09-25	0	1	49	2019-02-18	1966-01-28	53	0	69.4	164.5	25.6465	25.4605	1.39504	35.3123	25.3127	1.17914	1.20849	6.53705	19.1382	8.683	51788.5	18.2535	8.19735	0.319629	0.864923	8.93243	49394.3	2091.65	2394.15	1.14462	1845.58	1878.16	1.01766	2.09688	0.820688	0.837214	0.612088	0.57181	0.938685	1.06052	1.39734	1.16889	1.17373	4143.65	24.1349	2954.53	28.187
5730831	1	2015-05-19	2015-05-19	0	1	44	2019-02-18	1970-11-03	48	-1	67	165.5	24.4613	23.4455	1.35579	32.172	23.7294	1.30578	1.45229	5.74625	18.7628	8.35556	51391.7	18.029	7.96814	0.325745	0.892224	8.90944	49381.8	1905.7	2009.85	1.05465	1659.23	1525.86	0.919622	1.96364	0.725298	0.801305	0.620345	0.613422	0.826253	0.794616	1.09548	1.09535	1.12223	4109.76	24.4043	2995.46	23.4875
5730834	1	2015-09-24	2015-09-24	0	1	58	2019-02-18	1957-05-02	62	0	71.7	172.5	24.0958	25.1095	1.19632	30.7567	25.7094	1.1058	1.23912	6.04884	18.041	8.07207	53683.2	17.351	7.72077	0.32042	0.953449	10.1852	51630	2107.58	2053.25	0.974224	1861.5	1563.77	0.840059	1.98914	0.686318	0.722475	0.528577	0.549614	0.727957	0.856576	1.21386	0.970573	0.958825	3783.89	24.0914	3374.07	24.0492
5730837	1	2015-09-18	2015-09-18	0	1	53	2019-02-18	1962-11-08	56	-1	71.8	168.5	25.2886	23.2171	0.994307	27.3591	27.5157	1.04693	1.02739	5.86599	19.3998	9.04705	55080.5	18.4993	8.57657	0.339148	0.962916	7.77287	52523.7	2253.31	2556.71	1.13464	2012.41	1994.18	0.990941	2.3351	0.795896	0.779797	0.607847	0.563929	1.01878	1.07958	1.25454	1.16979	1.13692	3867.31	23.6559	3749.35	23.677
5730845	1	2015-07-07	2015-07-07	0	1	53	2019-02-18	1962-10-24	56	-1	61.6	173.5	20.4636	15.8466	0.811602	13.966	17.2079	0.786445	0.720152	3.23281	17.1678	8.16641	51679.1	16.4109	7.75829	0.379127	1.14126	5.17461	49400.5	2158.55	2278.6	1.05562	1888.58	1710.04	0.905465	2.10602	0.725412	0.738727	0.503512	0.537735	0.815977	0.895784	0.969525	1.10957	1.11251	4161.59	23.8184	3375.26	17.1357
5730846	1	2015-09-23	2015-09-23	0	1	44	2019-02-18	1971-10-29	47	-1	66.1	165	24.2792	30.9623	1.36579	38.8597	28.4522	1.23891	1.48787	7.43489	16.5778	7.05849	45133.2	15.8899	6.70799	0.276286	0.752189	13.7083	43260.1	1842.79	1873.03	1.01641	1613.44	1429.26	0.885847	1.93488	0.668677	0.720627	0.547567	0.555823	0.748833	0.930761	1.20628	1.0499	1.0568	3479.79	24.137	2900.79	31.5386
5730847	1	2016-09-06	2016-09-06	0	1	48	2019-02-18	1968-03-20	51	0	78.5	170.5	27.0036	30.3741	1.09051	32.5361	29.8358	1.03588	1.07	8.32742	19.0888	8.45769	55491.5	18.3839	8.06402	0.298628	0.86812	10.9797	53442.4	2037.1	2049.09	1.00589	1795.8	1646.12	0.916649	1.67	0.702055	0.740325	0.578489	0.527833	0.778836	0.832684	1.18245	1.15195	1.10002	3830.74	24.8756	2955.04	36.7129
5730848	1	2015-09-14	2015-09-14	0	1	51	2019-02-18	1964-09-10	54	-1	73.9	177	23.5884	20.8038	1.01223	23.273	22.9919	1.0253	1.04527	4.89602	18.6383	8.52926	58391.8	17.7243	8.03506	0.340636	1.06718	8.04003	55528.5	2327.38	2863.27	1.23026	2095.63	2339.89	1.11655	2.25848	0.800869	0.933934	0.664093	0.663014	1.02244	1.32106	1.4861	1.26668	1.28106	3889.27	23.8443	3456.29	22.5552
5730849	1	2016-09-23	2016-09-23	0	1	44	2019-02-18	1972-09-23	46	-1	81.7	180	25.216	23.3928	1.15238	27.053	23.4758	1.29954	1.27924	5.93145	19.4245	9.1749	62935.2	18.5266	8.7002	0.345026	1.11789	9.58377	60026	2369.58	2909.22	1.22773	2115.54	2299.63	1.08702	2.39956	0.82047	0.843168	0.65722	0.594097	0.95485	1.10781	1.39546	1.34523	1.29144	4172.32	23.6251	3467.9	25.6218
5730854	1	2015-06-18	2015-06-18	0	1	47	2019-02-18	1968-11-10	50	-1	62.9	165.5	22.9644	18.7863	1.14859	24.0448	20.9342	1.19475	1.20861	4.28447	18.5219	8.43078	50732	17.6085	7.95049	0.34621	0.948276	6.74533	48230	2095.24	2502	1.19414	1833.23	1894.31	1.03332	2.31938	0.83764	0.84921	0.603128	0.598187	0.871075	1.06049	1.1566	1.2772	1.28203	4122.87	23.5844	3540.86	19.4546
5730855	1	2015-09-10	2015-09-10	0	1	48	2019-02-18	1967-10-22	51	-1	78	173.5	25.9117	24.0114	1.16167	29.3622	25.2758	1.0951	1.10182	6.22819	19.7102	9.17188	59332.2	18.862	8.73162	0.336976	1.01437	8.57994	56778.7	2238.98	2553.5	1.14047	1973.79	1981.22	1.00376	2.158	0.797963	0.840018	0.586824	0.588545	0.943745	1.08887	1.26555	1.1752	1.20486	4083.47	23.8477	3623.14	25.2525
5730858	1	2016-07-14	2016-07-14	0	1	50	2019-02-18	1966-10-17	52	0	78	166.5	28.1362	25.8735	1.24533	32.0276	25.7182	1.10326	1.17312	7.32455	20.9845	9.41628	58173.7	20.1621	8.95806	0.318381	0.882625	8.27069	55893.9	2084.49	2279.78	1.09369	1843.59	1835.3	0.995506	1.84507	0.743013	0.793789	0.586209	0.581581	0.817778	0.926265	1.22165	1.26155	1.24971	3913.01	24.6698	3333.14	29.38
5730860	1	2016-09-08	2016-09-08	0	1	51	2019-02-18	1965-02-18	54	-1	87.4	176	28.2154	23.0272	1.36328	29.2737	21.4729	1.39498	1.58953	6.59002	22.0284	9.48251	68235.2	21.0561	8.98251	0.318355	0.986136	8.72002	65223.3	2357.24	3011.92	1.27773	2098.02	2472.49	1.17849	2.08101	0.859642	0.906902	0.67444	0.766569	1.10501	1.35565	1.75507	1.33823	1.34157	4385.42	24.2489	4050.63	25.6042
5730863	1	2015-06-23	2015-06-23	0	1	50	2019-02-18	1965-06-05	54	-1	73.1	170	25.2941	26.1378	1.3588	33.5824	24.7148	1.317	1.43755	6.58832	18.6178	8.31598	53805.3	17.6571	7.85424	0.310516	0.897393	10.6711	51028.9	2142.22	2776.43	1.29605	1883.8	2101.46	1.11554	2.61192	0.770427	0.861821	0.64538	0.698859	1.08023	1.21175	1.61794	1.25433	1.2924	4070.83	23.3336	2948.63	28.2589
5730865	1	2015-09-08	2015-09-08	0	1	43	2019-02-18	1972-08-13	47	-1	60.8	161	23.4559	19.7052	1.21507	26.0701	21.4556	1.10268	1.12395	4.59529	18.7249	8.52815	48536.8	17.8628	8.09673	0.34519	0.894767	6.42494	46302.2	1948.31	2234.59	1.14694	1699.44	1635	0.962078	2.40932	0.818813	0.830676	0.556815	0.571632	0.913504	0.946302	1.08294	1.11044	1.18185	3687.76	23.3028	3180.25	19.9542
5730869	1	2015-08-20	2015-08-20	0	1	53	2019-02-18	1962-04-04	57	-1	73.8	175	24.098	20.4126	1.15776	25.9342	22.4004	1.02908	1.16182	4.9013	19.1098	8.41829	58523.8	18.2651	7.93837	0.329421	1.00885	7.89796	55936.9	2174.47	2586.94	1.18968	1933.97	2028.11	1.04868	2.32357	0.8252	0.846606	0.605469	0.593159	0.87641	0.998828	1.24886	1.28879	1.27128	4025	23.7616	3650.87	20.3071
5730870	1	2015-07-20	2015-07-20	0	1	52	2019-02-18	1963-10-21	55	-1	75.3	165.5	27.4915	24.6433	1.24003	29.2867	23.6177	1.23925	1.35936	6.78889	20.7597	9.03349	56861.5	19.9107	8.62093	0.313585	0.858917	8.34821	54535.9	2094.84	2325.55	1.11013	1851.95	1730	0.934152	2.45191	0.705929	0.718427	0.581507	0.597818	0.879464	1.00179	1.29431	1.11628	1.07889	4204.01	23.9978	3278.92	27.073
5730871	1	2015-07-30	2015-07-30	0	1	57	2019-02-18	1958-04-05	61	-1	65	161.5	24.9212	26.1874	1.21275	32.3604	26.6835	1.14198	1.12532	6.56346	18.5	8.32345	48252.1	17.7879	7.95163	0.319071	0.83221	8.82276	46394.9	1870.26	1857.13	0.992979	1646.09	1378.73	0.837578	2.13406	0.679699	0.73336	0.475495	0.503351	0.73038	0.878697	1.08239	1.0048	0.978306	3500.73	24.0212	3085.53	31.8493
5730872	1	2015-05-07	2015-05-07	0	1	42	2019-02-18	1973-07-20	46	-1	67.7	175.5	21.9803	23.6828	1.07794	28.4592	26.4013	1.12402	1.07	5.27281	16.9915	7.84367	52334.2	16.2325	7.4072	0.336992	1.03794	10.1245	49996.4	2168.1	2337.78	1.07826	1896.15	1848.41	0.974823	1.79945	0.774742	0.804477	0.545843	0.554479	0.709691	0.828442	1.18647	1.23083	1.20839	4307.71	24.2502	3034.41	27.4029
5730878	1	2015-09-28	2015-09-28	0	1	56	2019-02-18	1959-03-19	60	-1	76.7	168.5	27.0144	22.2119	1.29074	29.0152	22.4795	1.13424	1.15656	5.97631	20.9296	9.82883	59423.9	19.9992	9.33236	0.345459	0.980835	7.12866	56782.2	2174.87	2641.68	1.21464	1945.52	2119.25	1.0893	2.27784	0.866743	0.8981	0.653181	0.630781	1.03254	1.2356	1.46995	1.26215	1.23393	3965.26	23.9147	3969.06	21.2208
5730879	1	2015-10-22	2015-10-22	0	1	52	2019-02-18	1963-08-05	56	-1	75	163	28.2284	25.0855	1.27128	32.4048	25.4898	1.23849	1.32202	6.86833	20.5113	9.40329	54496.5	19.6558	8.94444	0.31686	0.841865	8.13321	52223.6	2059	2272.91	1.10389	1827.66	1801.6	0.985744	2.03725	0.782657	0.801332	0.545488	0.584368	0.835714	0.993608	1.37502	1.16907	1.1881	3750.5	24.0504	3629.87	24.9784
5730884	1	2015-08-24	2015-08-24	0	1	54	2019-02-18	1961-09-06	57	-1	83.5	175.5	27.1102	26.1255	1.39245	33.74	24.2307	1.2117	1.38767	7.08512	20.0344	8.71062	61706.5	19.251	8.30758	0.306438	0.943836	10.4101	59293.6	2164.92	2412.97	1.11458	1912.47	1814	0.948509	2.37265	0.757643	0.76123	0.573171	0.542461	0.969801	0.915288	1.1981	1.14471	1.14165	4523.91	24.0494	3814.71	27.6679
5730885	1	2015-09-08	2015-09-08	0	1	49	2019-02-18	1966-01-01	53	-1	66	161.5	25.3046	26.2406	1.25382	31.5089	25.1304	1.10528	1.12798	6.7248	18.9027	8.4717	49302.4	18.0476	8.05381	0.318275	0.830133	8.75634	47072.3	2040.69	2230.14	1.09284	1802.57	1651.81	0.916363	2.42879	0.727356	0.732029	0.579066	0.576048	0.831873	1.03929	1.21553	1.04934	1.05261	3806.92	23.6743	3219	29.3384
5730886	1	2015-08-20	2015-08-20	0	1	53	2019-02-18	1962-01-11	57	-1	73	172.5	24.5327	22.0645	1.23226	26.5092	21.5126	1.10745	1.11456	5.42946	19.1777	8.79175	57065.6	18.4123	8.34063	0.339981	1.01166	8.03099	54788.1	2205.53	2277.54	1.03265	1970.61	1826.85	0.927051	1.9184	0.73809	0.805704	0.535804	0.567134	0.722757	0.814042	1.05989	1.15962	1.14887	3786.18	24.2161	3492.17	24.9552
5730890	1	2015-10-15	2015-10-15	0	1	51	2019-02-18	1963-11-23	55	-1	68.2	166	24.7496	22.4111	1.04033	26.1203	25.1076	1.13298	1.11708	5.53007	19.1455	8.6892	52757.4	18.241	8.19818	0.331245	0.912779	7.67698	50264.9	2032.72	2492.41	1.22615	1797	1937.46	1.07817	2.35424	0.807792	0.882034	0.660168	0.715473	0.869023	0.969157	1.40339	1.26351	1.30287	3659.58	23.5577	3292.31	26.8509
5730893	1	2015-09-08	2015-09-08	0	1	46	2019-02-18	1969-04-08	50	-1	70.9	173.5	23.5531	24.0367	1.12317	27.6499	24.6178	1.04939	1.12448	5.54227	17.5152	7.77851	52724.8	16.6854	7.34731	0.311947	0.939031	9.99552	50227	2132.27	2497.83	1.17144	1879.82	1881.17	1.00072	2.4427	0.828045	0.823603	0.58967	0.576878	0.909054	0.99926	1.22163	1.16092	1.20521	3914.77	23.4744	3341.51	25.6804
5730894	1	2015-09-23	2015-09-23	0	1	47	2019-02-18	1968-09-01	50	-1	78.3	177.5	24.8522	25.1268	1.25916	31.955	25.3781	1.09803	1.20485	6.22087	18.537	8.36604	58403.1	17.7588	7.95378	0.320043	1.00834	10.4019	55951.3	2238.18	2451.9	1.09548	1996.49	1966.5	0.984978	2.0083	0.791634	0.822188	0.569486	0.512434	0.876965	1.01992	1.27078	1.18869	1.13305	3836.51	24.0815	3570.18	26.2914
5730896	1	2015-08-04	2015-08-04	0	1	48	2019-02-18	1967-12-30	51	-1	51.9	171	17.7491	14.0314	0.87514	14.6373	16.7257	0.897635	0.86318	2.49425	15.2819	7.14235	44685.7	14.4237	6.7218	0.378713	1.1074	5.43347	42176.4	2067.36	2509.37	1.2138	1792.62	1829.99	1.02085	2.47273	0.786069	0.803159	0.644099	0.65651	1.02887	1.1025	1.11772	1.26401	1.19664	3866.96	22.9554	2711.13	13.5018
5730899	1	2015-09-28	2015-09-28	0	1	47	2019-02-18	1968-08-12	51	-1	76.3	175.5	24.7725	20.7141	1.15102	25.0192	21.7365	1.01943	0.972079	5.20965	19.9407	9.18188	61417.8	19.081	8.71562	0.351826	1.08363	7.08987	58769.9	2328.97	2647.93	1.13695	2054.62	2158.56	1.05059	1.78374	0.775753	0.832081	0.597017	0.608747	0.987845	1.2203	1.40151	1.23232	1.22153	4427.34	24.3864	3883.64	25.1347
5732641	1	2015-05-19	2015-05-19	0	1	42	2019-02-18	1972-09-25	46	-1	74.6	167.5	26.5894	31.3291	1.36046	38.0665	27.9806	1.20458	1.32406	8.32835	18.2551	8.05495	51216.9	17.4411	7.61462	0.286378	0.803468	12.4938	48933.2	2072.94	2283.7	1.10167	1832.44	1784.06	0.973602	2.07749	0.760817	0.799343	0.629203	0.620488	0.880078	0.920094	1.17956	1.17952	1.25223	4157.56	24.3555	3012.66	35.167
5732708	1	2015-08-26	2015-08-26	0	1	48	2019-02-18	1966-10-18	52	-1	71.8	168	25.4393	27.7828	1.20265	33.081	27.5068	1.08186	1.04592	7.01446	18.233	8.14147	51460.9	17.5115	7.77622	0.305677	0.862742	10.1826	49424.5	2044.27	2036.48	0.99619	1780.67	1519.49	0.853326	1.96128	0.68311	0.710603	0.508245	0.535685	0.760747	0.891231	1.03336	1.03322	1.03281	4371.25	24.3373	3347.48	33.4671
5732726	1	2015-05-13	2015-05-13	0	1	51	2019-02-18	1964-06-10	55	-1	70	165	25.7117	25.1422	1.29313	31.9195	24.6839	1.24379	1.40885	6.43416	19.1569	8.45626	52154.7	18.3815	8.06577	0.313701	0.854051	9.24296	50043.8	1986.53	2110.9	1.0626	1756.38	1577.2	0.897981	2.31892	0.746852	0.794116	0.589157	0.595159	0.876589	0.923678	1.10221	1.00526	1.09453	3860.21	24.0515	2857.08	27.9257
5732731	1	2016-09-02	2016-09-02	0	1	53	2019-02-18	1963-03-06	56	-1	70.5	174	23.2858	19.353	1.07155	21.9985	20.5297	0.983645	1.10451	4.49943	18.7498	8.24285	56766.9	17.9132	7.79801	0.334883	1.01389	7.33571	54234.1	2163.72	2532.76	1.17056	1912.47	2024.35	1.0585	2.0235	0.77663	0.872043	0.657689	0.656851	0.932635	1.19417	1.30658	1.2673	1.21042	3760.84	23.7573	2970.73	20.1899
5732744	1	2015-06-16	2015-06-16	0	1	49	2019-02-18	1965-09-10	53	-1	76.9	168	27.2463	26.7615	1.11689	29.7392	26.6268	1.0272	1.15966	7.28331	19.9323	8.58903	56257	19.1124	8.1814	0.300275	0.847498	9.31654	53942.8	2105.19	2314.24	1.0993	1841.59	1760.8	0.956128	2.09955	0.73176	0.760017	0.568744	0.562696	0.875423	1.03596	1.37923	1.11382	1.10741	4038.63	24.0649	3378.14	30.6179
5732752	1	2015-08-04	2015-08-04	0	1	51	2019-02-18	1963-12-30	55	-1	68.2	168	24.1638	21.822	0.982398	24.0335	24.4641	1.10624	1.01742	5.24089	18.7757	8.89093	52992.5	18.0362	8.47944	0.350914	0.990421	7.38179	50905.5	2046.66	2087.07	1.01975	1799.39	1612.86	0.896339	1.91778	0.725105	0.76592	0.53626	0.545597	0.749818	0.792	1.02073	1.10028	1.09449	3939.63	24.1358	3437.56	25.3109
5736993	1	2015-07-21	2015-07-21	0	1	54	2019-02-18	1960-08-10	59	-1	77.6	172	26.2304	23.8555	1.37171	31.3869	22.8815	1.35529	1.50878	6.20691	19.8119	8.94629	58611.5	18.9167	8.46252	0.322623	0.954447	9.35656	55963.1	2133.46	2648.43	1.24138	1905.3	2084.78	1.0942	2.47047	0.872682	0.910384	0.670419	0.677695	1.05816	1.16867	1.40048	1.27554	1.24976	3969.31	23.8158	3794.22	23.8858
5736995	1	2015-09-24	2015-09-24	0	1	58	2019-02-18	1957-03-01	62	-1	78.5	165	28.8338	24.293	1.19799	28.2786	23.6051	1.17965	1.29181	7.02755	21.9007	9.43628	59624.7	20.9657	8.96936	0.311071	0.846891	7.6792	57079	2084.49	2545.68	1.22125	1835.62	1918.19	1.04498	2.52141	0.857173	0.88782	0.633263	0.574678	1.05348	1.21314	1.40745	1.20842	1.20125	4480.53	24.2606	3905.5	27.387
5736998	1	2015-09-09	2015-09-09	0	1	46	2019-02-18	1968-11-23	50	-1	67.5	167	24.2031	26.2299	1.10912	30.099	27.1376	1.01298	1.13544	6.32506	17.7889	7.86144	49611.5	16.9448	7.41692	0.306445	0.854645	10.0618	47257.3	2102.4	2354.15	1.11974	1855.53	1826.65	0.984436	2.13671	0.768329	0.796756	0.549175	0.610588	0.833035	1.08215	1.31082	1.18028	1.15276	3673.42	23.6845	3111.82	26.7066
5791928	1	2015-07-31	2015-07-31	0	1	50	2019-02-18	1965-01-29	54	0	77.9	182	23.5177	21.6431	1.31792	29.2546	22.1975	1.13936	1.15459	5.0432	18.2584	8.32965	60479.2	17.4538	7.9047	0.336117	1.11335	9.36943	57813.9	2416.97	2665.35	1.10277	2154.96	2054.13	0.953209	2.33287	0.761815	0.811275	0.578032	0.592187	0.835017	1.0126	1.17229	1.09136	1.1499	4274	23.7019	3449.79	24.4281
5817695	1	2016-03-21	2016-03-21	0	1	46	2019-02-18	1970-02-08	49	-1	65.2	173	21.7849	22.2505	1.0982	25.4073	23.1354	1.13598	1.20392	4.82524	16.8607	7.39045	50462.4	16.0377	6.97497	0.320175	0.95825	9.84924	47999.1	2129.48	2463.31	1.15677	1859.91	1847.73	0.993449	2.28359	0.78996	0.811671	0.622441	0.681301	0.940248	1.033	1.27217	1.1706	1.13577	4301.85	23.6097	2792.6	25.1494
5820624	1	2015-09-11	2015-09-11	0	1	50	2019-02-18	1965-07-26	54	-1	79.5	164.5	29.3789	22.5361	1.08397	24.9858	23.0502	0.991249	1.06094	6.575	22.6005	10.1205	61157.4	21.7829	9.70053	0.330187	0.893495	6.19517	58945.1	1977.37	2212.25	1.11878	1744.84	1686.54	0.966587	2.26075	0.785602	0.810299	0.559184	0.621875	0.895932	1.00714	1.18478	1.14295	1.15701	3905.84	23.9436	4032.57	25.2749
5836701	1	2015-07-08	2015-07-08	0	1	51	2019-02-18	1963-08-08	56	-1	63.6	169.5	22.1369	17.7436	1.16515	21.4128	18.3778	0.974125	0.979029	3.96924	18.4007	8.41353	52865.8	17.5143	7.93771	0.358573	1.03019	6.1225	50318.9	2199.96	2546.91	1.15771	1962.24	1957.41	0.997538	2.47985	0.82068	0.84111	0.565983	0.585094	0.831969	1.02704	1.21549	1.16553	1.21611	3823.19	23.4073	3332.76	19.4061
5878017	1	2015-05-15	2015-05-15	0	1	53	2019-02-18	1961-12-02	57	-1	80	171	27.3588	28.338	1.40924	35.798	25.4024	1.38301	1.63492	7.72384	19.5322	8.32963	57114.2	18.573	7.83652	0.286435	0.837564	11.7818	54309.2	2229.82	2804.98	1.25794	1982.95	2163.39	1.091	2.59888	0.804976	0.806742	0.709942	0.631131	0.996869	1.20478	1.50188	1.2929	1.30564	4079.04	23.5553	3025.02	32.9967
5878020	1	2015-05-15	2015-05-15	0	1	45	2019-02-18	1969-12-04	49	-1	75	166.5	27.0541	26.6191	1.26577	30.062	23.75	1.24448	1.40405	7.31897	20.1762	8.88944	55932.9	19.3354	8.43198	0.311671	0.864023	9.4732	53602.1	2133.06	2330.85	1.09272	1898.93	1889.82	0.995202	1.88368	0.796219	0.853323	0.612988	0.592153	0.8756	0.924095	1.32717	1.18923	1.17242	3756.06	24.3348	3415.79	28.1891
5878021	1	2015-05-18	2015-05-18	0	1	53	2019-02-18	1962-01-16	57	-1	72	175	23.5102	24.0636	1.32652	30.1666	22.7412	1.29746	1.20896	5.87014	18.5241	8.69523	56730.2	17.812	8.30381	0.3532	1.08168	9.56901	54549.2	2207.52	2181	0.987987	1956.27	1725.1	0.881832	1.81452	0.699272	0.74829	0.573952	0.52125	0.872415	0.924914	1.10326	1.00678	1.03454	4116.59	24.5972	3524.48	27.9144
5878035	1	2015-05-27	2015-05-27	0	1	50	2019-02-18	1964-10-27	54	-1	60	168	21.2585	20.8004	1.34525	26.2159	19.4877	1.18651	1.20514	4.41913	16.8262	7.56534	47490.4	16.0959	7.1773	0.33762	0.9529	8.47992	45428.9	2013.21	2061.46	1.02397	1779.48	1558.44	0.875782	2.15213	0.694054	0.772096	0.472002	0.493914	0.673904	0.86943	1.00941	1.09445	1.09655	3508.26	23.6794	2796.53	23.9493
5878073	1	2015-05-29	2015-05-29	0	1	50	2019-02-18	1964-08-10	55	-1	67.6	167.5	24.0945	25.5009	1.27155	29.5631	23.2496	1.10775	1.26322	6.12292	17.8877	7.50067	50186.1	17.191	7.13364	0.29607	0.830661	10.2184	48231.6	1927.6	1954.56	1.01399	1713.78	1446.49	0.844036	2.37612	0.709148	0.723989	0.517058	0.521962	0.715288	0.743122	1.02014	1.04569	1.01515	3656.39	23.9434	2988.11	30.0215
5878074	1	2015-05-27	2015-05-27	0	1	33	2019-02-18	1981-11-17	37	-1	83.7	179.5	25.9775	28.2674	1.14703	33.0716	28.8324	1.10581	1.24963	7.33212	18.6063	8.20312	59950.1	17.7657	7.76151	0.298779	0.962672	12.3377	57241.6	2329.37	2708.46	1.16275	2072.54	2136.77	1.03099	2.22599	0.822441	0.843265	0.636296	0.610529	0.854083	1.16595	1.39822	1.23557	1.22149	4237.85	23.9226	3447.48	29.5574
5878083	1	2015-05-29	2015-05-29	0	1	45	2019-02-18	1969-07-14	50	-1	78.5	181.5	23.8296	19.0722	1.24729	23.9862	19.2307	1.13798	1.18012	4.52852	19.2156	8.74683	63300.5	18.4669	8.31331	0.348865	1.14924	7.71617	60834.1	2346.49	2466.39	1.0511	2111.56	2008.23	0.951063	1.9502	0.76447	0.786316	0.529171	0.534572	0.69285	0.835764	1.07325	1.2004	1.18466	3759.99	24.0701	3619.56	21.1308
5878086	1	2015-05-29	2015-05-29	0	1	40	2019-02-18	1974-11-04	44	-1	63.7	163	23.9753	21.0001	1.12505	26.6772	23.712	0.9904	1.08902	5.04492	18.9784	8.23049	50423.8	17.9665	7.77	0.324083	0.861057	7.07368	47735.2	2053.03	2688.61	1.30958	1786.64	1886.01	1.05561	3.01296	0.826943	0.858462	0.65582	0.650833	0.913507	1.2411	1.3758	1.25017	1.2479	4332.89	22.8641	2903.1	22.3151
5878087	1	2015-06-18	2015-06-18	0	1	49	2019-02-18	1965-08-24	54	-1	81	168.5	28.5289	27.8144	1.09781	29.3559	26.7403	1.10589	1.26444	7.89411	20.4872	8.67758	58167.8	19.5671	8.18269	0.286821	0.814349	9.88042	55555.3	2124.7	2612.5	1.22958	1901.72	2093.31	1.10074	2.32838	0.792208	0.873152	0.567951	0.556369	0.934184	1.20152	1.49245	1.39731	1.32338	3794.05	24.2071	3198.28	34.8282
5878089	1	2015-06-03	2015-06-03	0	1	53	2019-02-18	1961-06-13	58	-1	76.1	170.5	26.178	22.7971	1.33699	29.0447	21.7239	1.25429	1.34166	5.93162	20.0876	8.94832	58395	19.3174	8.53837	0.326166	0.948174	8.31213	56156	2030.73	2239.02	1.10257	1775.5	1737.08	0.978366	1.96657	0.754977	0.79974	0.561016	0.563417	0.829824	0.997763	1.31159	1.16811	1.21766	4174.4	24.3217	3819.09	24.6456
5878201	1	2015-10-09	2015-10-09	0	1	56	2019-02-18	1959-03-19	60	-1	69.1	180.5	21.2092	26.9804	1.15248	32.0855	27.8404	1.1703	1.21613	5.78104	15.6458	7.05214	50974.3	15.0284	6.71318	0.316523	1.03124	13.8813	48963	2176.47	2011.25	0.924092	1906.9	1578.76	0.82792	1.6044	0.654759	0.675487	0.460907	0.528099	0.70299	0.765141	1.02933	1.0074	1.00447	3943.23	24.4204	2906.68	29.5866
5878211	1	2015-11-04	2015-11-04	0	1	54	2019-02-18	1961-08-09	58	-1	90.4	173	30.2048	32.2808	1.28438	37.3219	29.0584	1.26917	1.39381	9.69245	20.333	8.99807	60854.7	19.4925	8.55644	0.283281	0.847831	12.2889	58339.1	2193.19	2515.57	1.14699	1959.85	1926.69	0.98308	2.52375	0.792108	0.813283	0.575499	0.555899	0.925565	0.977152	1.25495	1.22625	1.23851	4151.91	24.045	3659.13	36.4312
5878212	1	2015-05-25	2015-05-25	0	1	55	2019-02-18	1960-05-06	59	0	65.1	171.5	22.1336	20.3184	1.13118	26.3566	23.3	1.05518	1.06803	4.48065	17.5715	8.04486	51681.8	16.6891	7.56989	0.342008	1.00592	7.91177	49086.5	2156.16	2595.33	1.20368	1923.62	2036.67	1.05877	2.40244	0.824822	0.865113	0.681447	0.67898	1.03244	1.28946	1.35063	1.23153	1.15747	3726.58	23.5966	2972.21	23.2217
5878217	1	2015-10-09	2015-10-09	0	1	51	2019-02-18	1964-02-01	55	-1	80.2	175.5	26.0387	23.045	1.26637	30.6073	24.1694	1.19185	1.2872	6.01042	20.0709	8.94645	61818.8	19.2468	8.50322	0.32656	1.00581	8.82366	59280.6	2248.14	2538.12	1.12899	2004.45	1979.34	0.987471	2.29304	0.77385	0.817394	0.674428	0.63308	0.882119	0.927997	1.24036	1.16232	1.18669	4315.09	24.1553	3933.8	26.1298
5878218	1	2015-10-14	2015-10-14	0	1	53	2019-02-18	1962-08-16	57	0	58	165	21.3039	20.7176	1.12288	25.8176	22.9923	0.935959	1.10406	4.62105	17.6839	7.43999	48144.4	16.814	7.02253	0.329635	0.897431	7.68582	45776.1	1995.69	2368.36	1.18674	1753.99	1881.65	1.07278	2.01372	0.833654	0.854608	0.656097	0.668431	1.02532	1.42112	1.47863	1.17069	1.1769	3547.88	23.8348	2761.64	22.6052
5878219	1	2015-11-09	2015-11-09	0	1	42	2019-02-18	1973-04-07	46	-1	70.3	169	24.614	22.738	0.964913	23.0656	23.9044	1.00383	1.05184	5.50823	18.7166	8.39478	53456.4	17.7753	7.9019	0.321033	0.916902	8.16051	50768.1	2219.47	2688.28	1.21123	1950.3	2075.46	1.06417	2.2767	0.811662	0.886534	0.61802	0.610731	0.946173	1.19082	1.44788	1.20504	1.2237	3964.62	23.4943	3234.97	24.7621
5878221	1	2015-06-09	2015-06-09	0	1	62	2019-02-18	1953-11-14	65	-1	62	162	23.6244	19.2359	1.21835	24.691	20.266	1.09465	1.07727	4.58534	19.2521	8.82663	50525.2	18.4348	8.37578	0.354538	0.930451	6.02876	48380.2	1901.72	2145.01	1.12793	1670.77	1684.79	1.00839	1.99275	0.754151	0.768926	0.530046	0.576371	0.833478	1.03755	1.24814	1.16953	1.28181	3720.91	23.9753	3658.53	21.4166
5878222	1	2015-06-09	2015-06-09	0	1	64	2019-02-18	1951-06-14	68	-1	78.2	179.5	24.2705	25.2798	1.33238	31.861	23.9129	1.08872	1.13971	6.17138	18.241	8.15895	58772.8	17.3491	7.65433	0.315376	1.01615	10.8746	55899.1	2279.59	2873.67	1.2606	2034.71	2288.65	1.1248	2.38898	0.84843	0.906167	0.736734	0.723088	1.00839	1.07867	1.46517	1.31673	1.34436	3964.45	23.7329	3362.9	28.8589
5878225	1	2015-10-22	2015-10-22	0	1	47	2019-02-18	1968-11-23	50	-1	78	173	26.0617	23.4876	1.21537	29.2112	24.0348	0.951433	0.911994	6.12541	19.9539	9.25089	59720	19.0242	8.78117	0.336938	1.00842	7.75046	56937.5	2247.34	2782.47	1.23812	1985.34	2037.66	1.02635	2.84273	0.748435	0.877409	0.574752	0.58602	0.859791	0.970212	1.30674	1.20883	1.31747	4615.84	23.459	3755.74	27.1079
5878227	1	2015-07-20	2015-07-20	0	1	53	2019-02-18	1962-02-03	57	-1	72.7	162	27.7016	24.8608	1.2828	32.4582	25.3026	1.25336	1.29655	6.86906	20.761	9.58409	54485.2	19.9884	9.14478	0.330118	0.866361	7.75901	52457.6	2051.83	2027.6	0.988187	1830.84	1592.31	0.869713	1.96971	0.710026	0.716909	0.51233	0.519496	0.814582	0.800513	1.03731	1.05696	1.06393	3658.82	24.3281	3655.11	24.8696
5878237	1	2016-09-09	2016-09-09	0	1	47	2019-02-18	1969-09-24	49	-1	67.4	165	24.7567	22.8969	1.23519	27.3172	22.1157	1.09089	1.24378	5.66515	19.0768	8.22746	51936.7	18.2734	7.83261	0.316384	0.861355	8.18644	49749.3	1967.82	2187.47	1.11162	1711.39	1593.81	0.931296	2.3151	0.767952	0.812729	0.576838	0.655471	0.800804	0.912917	1.24308	1.07972	1.07405	4019.56	23.5893	3311.31	24.7269
5878250	1	2015-10-13	2015-10-13	0	1	51	2019-02-18	1964-12-06	54	0	78.1	184	23.0683	22.8093	1.11787	26.143	23.3865	1.02273	1.1253	5.2623	17.8085	7.90642	60292.6	17.0251	7.48938	0.324661	1.09917	10.3959	57640	2329.77	2652.53	1.13854	2063.38	2016.33	0.977196	2.38828	0.774604	0.840395	0.615188	0.584187	0.847847	0.890208	1.17208	1.18704	1.15102	4294.84	23.6317	3797.91	22.9991
5878252	1	2015-08-05	2015-08-05	0	1	51	2019-02-18	1963-12-28	55	-1	69.7	161	26.8894	24.5402	1.21987	30.902	25.3323	1.12841	1.29452	6.70036	20.6032	8.71281	53405.7	19.784	8.28234	0.308015	0.798406	7.92207	51282.2	1888.98	2123.48	1.12414	1644.1	1669.68	1.01556	1.85312	0.751058	0.814916	0.576458	0.588391	0.953677	0.985757	1.40882	1.21195	1.26082	4282.19	24.9722	3480.29	27.0894
5878253	1	2015-11-13	2015-11-13	0	1	53	2019-02-18	1962-10-17	56	-1	64.3	164.5	23.7618	20.8781	1.1325	24.2831	21.442	1.16486	1.24135	4.95625	18.7827	8.34458	50826.4	17.9686	7.91866	0.333252	0.901788	7.43347	48623.5	1971.8	2202.91	1.11721	1716.17	1653.76	0.963634	2.14822	0.794584	0.828588	0.558833	0.574887	0.772024	0.980908	1.17207	1.16396	1.12659	4042.49	23.805	3234.17	22.4653
5878255	1	2015-07-24	2015-07-24	0	1	49	2019-02-18	1966-10-19	52	-1	88.6	168	31.3917	29.9231	1.48206	36.2955	24.4898	1.31739	1.54172	9.36098	21.9224	9.36108	61873.9	21.1198	8.949	0.285075	0.804596	10.3035	59608.5	2119.92	2265.39	1.06862	1886.19	1781.83	0.94467	2.06885	0.751037	0.75105	0.521273	0.545757	0.890254	1.10491	1.24944	1.14948	1.1237	4092.61	24.5846	3602.98	32.3971
5878257	1	2015-07-08	2015-07-08	0	1	51	2019-02-18	1964-10-09	54	0	72	177	22.9819	18.6949	1.07769	24.0564	22.3222	1.01575	0.947947	4.31216	18.7538	9.00497	58753.9	17.7775	8.48944	0.369397	1.15728	6.79194	55695.2	2378.34	3058.67	1.28605	2129.08	2457.21	1.15412	2.41297	0.845806	0.874213	0.679919	0.710065	1.25874	1.47423	1.51282	1.27848	1.31823	4140.24	23.5043	4246.08	18.7627
5878259	1	2015-10-29	2015-10-29	0	1	41	2019-02-18	1974-12-28	44	-1	75.5	172	25.5206	22.3197	1.02726	23.9248	23.2899	0.906112	0.954407	5.7342	19.957	8.83041	59040.6	19.1169	8.3872	0.328645	0.972263	7.44048	56555.3	2157.35	2485.35	1.15204	1887.78	1877.19	0.994391	2.25602	0.793414	0.836847	0.569108	0.600187	0.82408	0.984178	1.19024	1.22431	1.19243	4560.33	24.0079	3842.09	23.9127
5878262	1	2015-10-13	2015-10-13	0	1	47	2019-02-18	1968-09-27	50	0	71.6	171.5	24.3436	22.695	1.19185	26.5201	22.2513	1.10914	1.13285	5.53086	18.8395	8.77142	55411.3	18.0786	8.36582	0.343656	1.01077	8.34188	53173.3	2104	2237.97	1.06368	1868.27	1706.82	0.913584	2.25326	0.741596	0.791651	0.546827	0.610268	0.730494	0.825314	1.04952	1.15626	1.09403	3971.82	23.9408	3660.79	21.5885
5878266	1	2015-10-20	2015-10-20	0	1	51	2019-02-18	1964-06-26	55	-1	83.9	175	27.3959	19.6006	1.30842	26.2641	20.0732	1.16475	1.00782	5.37913	22.0646	10.6304	67572.8	21.0801	10.1182	0.369333	1.13108	6.01294	64557.8	2344.1	3014.98	1.2862	2072.14	2369.61	1.14356	2.37304	0.824942	0.861143	0.661031	0.655339	1.00304	1.34169	1.54885	1.38607	1.31747	4429.39	23.573	4758.37	24.0701
5878267	1	2015-10-14	2015-10-14	0	1	53	2019-02-18	1962-09-22	56	-1	69.5	172.5	23.3564	25.6329	1.22557	30.2084	24.6485	1.20206	1.33225	5.91105	17.1493	7.6128	51030	16.3611	7.19432	0.308023	0.916561	11.4134	48684.5	2098.02	2345.5	1.11796	1861.9	1897.83	1.0193	1.8959	0.750639	0.840088	0.57301	0.573616	0.907138	0.917271	1.54991	1.20682	1.18806	3881.71	24.3021	3044.24	27.4092
5878275	1	2015-10-15	2015-10-15	0	1	54	2019-02-18	1961-05-21	58	-1	57.9	166.5	20.8858	21.2191	1.15929	27.4376	23.6675	1.05961	1.05367	4.3963	16.3223	7.39305	45249.2	15.7143	7.08406	0.339181	0.940287	8.25218	43563.7	1795.4	1685.46	0.938766	1562.07	1224.35	0.783801	1.97618	0.628661	0.633205	0.506689	0.540683	0.696601	0.648201	0.961533	0.928899	0.971501	3379.55	23.7898	2719.8	24.5398
5878277	1	2016-06-27	2016-06-27	0	1	64	2019-02-18	1952-12-05	66	-1	52.9	163	19.9104	24.3179	0.999416	27.226	27.2419	1.02639	1.17957	4.85224	15.1011	6.46106	40122.2	14.434	6.12028	0.307391	0.816707	10.6708	38349.7	1761.96	1772.52	1.006	1544.95	1306.69	0.84578	2.14662	0.691732	0.720638	0.47721	0.526062	0.740198	0.849097	1.039	1.01128	1.02126	3188.56	23.6492	2462.86	25.7884
5878278	1	2015-11-11	2015-11-11	0	1	41	2019-02-18	1974-05-10	45	-1	85.3	168	30.2225	30.092	1.24697	35.919	28.805	1.14916	1.22162	9.0178	20.9497	9.32165	59128.3	20.1719	8.8986	0.294436	0.831017	10.0001	56933.2	2095.24	2195.09	1.04766	1856.33	1733.66	0.933921	1.93139	0.752437	0.786496	0.521962	0.540939	0.805029	0.948165	1.11942	1.15527	1.1598	3994.49	24.7564	3655.28	33.3217
5878280	1	2015-07-14	2015-07-14	0	1	50	2019-02-18	1965-02-04	54	-1	65	171	22.2291	24.2028	1.28944	33.2872	25.8153	1.12954	1.14767	5.30996	16.6295	7.56189	48626.4	15.9776	7.2122	0.324449	0.948722	10.1989	46720.2	1974.59	1906.14	0.965337	1729.31	1425.39	0.824254	1.96002	0.694751	0.717853	0.479521	0.52382	0.712006	0.769809	1.06319	0.941427	0.929598	3661.81	23.9536	2894.59	27.4338
5878283	1	2015-10-10	2015-10-10	0	1	51	2019-02-18	1964-09-15	54	-1	72.9	164.5	26.9399	27.3062	1.3782	35.6941	25.899	1.28658	1.55463	7.30701	19.4525	8.35743	52638.9	18.7608	8.00039	0.296972	0.803614	10.2241	50767.3	1893.36	1871.64	0.988528	1652.06	1408.86	0.85279	1.91786	0.681422	0.706678	0.500884	0.527731	0.756267	0.779597	1.07723	1.04898	1.05867	4122.62	24.4467	3110.86	27.314
5878287	1	2015-11-13	2015-11-13	0	1	46	2019-02-18	1969-01-25	50	-1	77	177	24.5779	20.8825	1.07328	23.0921	21.5154	0.922302	0.903488	5.07851	19.2409	8.89542	60279.8	18.4941	8.47956	0.345008	1.08088	7.26184	57940.2	2261.28	2339.57	1.03462	2016.4	1855.19	0.920053	1.97802	0.706669	0.748826	0.504133	0.52017	0.72747	0.849319	1.24296	1.10602	1.0675	4011.53	24.0931	3836.76	21.9074
5878288	1	2015-09-24	2015-09-24	0	1	57	2019-02-18	1958-09-23	60	0	70.2	177	22.4074	22.2823	1.39049	30.9942	22.29	1.16099	1.18871	4.95573	17.285	7.85228	54152	16.3659	7.37918	0.32932	1.03173	9.91015	51272.9	2250.53	2879.18	1.27933	1996.89	2162.06	1.08272	2.82728	0.862599	0.864072	0.675893	0.654543	1.11391	1.19684	1.30164	1.25527	1.27719	4019.44	23.1523	3606.67	23.7492
5892106	1	2015-06-19	2015-06-19	0	1	53	2019-02-18	1962-02-14	57	-1	86.6	169	30.3211	28.8408	1.288	35.0295	27.1969	1.08916	1.14055	8.62811	21.2882	9.53858	60801.2	20.5268	9.11887	0.300744	0.858954	9.32308	58626.5	2154.57	2174.75	1.00937	1901.72	1673.2	0.879836	1.98362	0.727511	0.735154	0.503562	0.525801	0.696994	0.805528	1.1137	1.08089	1.06556	4321.68	24.3052	3846.89	33.061
5895273	1	2015-06-18	2015-06-18	0	1	51	2019-02-18	1963-12-25	55	-1	70	163	26.3465	21.5649	1.39881	28.8327	20.6123	1.23119	1.26015	5.63986	20.5131	9.12673	54501.3	19.5284	8.6257	0.327395	0.869855	6.9422	51884.9	2160.14	2616.39	1.21121	1937.56	2043.17	1.05451	2.57531	0.751914	0.81002	0.60145	0.663955	0.975392	1.23	1.4318	1.26742	1.25757	3783.04	23.6454	3404.69	24.9473
5989592	1	2015-04-16	2015-04-16	0	1	41	2019-02-18	1973-05-20	46	-1	79	177	25.2163	27.4545	1.26446	32.5862	25.7709	1.07176	1.02151	6.92322	18.2939	8.43471	57312.9	17.5075	7.99244	0.316956	0.992991	10.8661	54849.3	2170.89	2463.61	1.13484	1918.44	2009.42	1.04742	1.79914	0.769833	0.793482	0.567834	0.588158	0.876903	1.14552	1.29526	1.2627	1.27804	4018.11	24.395	3401.35	34.7594
5994279	1	2015-07-22	2015-07-22	0	1	53	2019-02-18	1961-10-16	57	0	80.7	164.5	29.8223	32.7177	1.41439	39.9114	28.218	1.42689	1.96104	9.72812	20.0054	8.1235	54135.1	19.3342	7.77684	0.260772	0.705656	12.8445	52318.8	1872.65	1816.33	0.969925	1663.61	1390.15	0.835626	2.03868	0.721266	0.73044	0.517777	0.503662	0.798345	0.903797	0.980967	1.00161	1.04094	3760.09	24.7923	3048.04	33.2709
5998147	1	2015-05-07	2015-05-07	0	1	35	2019-02-18	1979-08-22	40	-1	64.7	167.5	23.0608	18.9723	1.09818	24.0876	21.9342	0.971397	0.945109	4.33017	18.4935	8.42501	51885.7	17.608	7.95377	0.344904	0.967671	6.32815	49401.4	2091.25	2484.33	1.18796	1827.66	1957.98	1.07131	1.99679	0.813204	0.848048	0.630169	0.598195	0.924252	1.18354	1.31904	1.25942	1.31898	4010.26	23.6656	3230.6	22.0664
6030316	1	2015-09-23	2015-09-23	0	1	52	2019-02-18	1963-03-08	56	-1	71.1	169.5	24.7474	18.1809	1.24695	22.5225	18.062	1.02382	1.18972	4.54553	20.4561	8.52809	58771	19.5138	8.05475	0.325478	0.935107	6.25892	56063.7	2208.32	2707.28	1.22594	1937.56	2025.57	1.04543	2.5177	0.803914	0.824189	0.701214	0.686453	0.984674	1.03664	1.31553	1.24079	1.20687	4240.38	23.4234	3224.82	20.8269
6034001	1	2015-03-31	2015-03-31	0	1	26	2019-02-18	1988-06-14	31	-1	76	169	26.6097	24.5405	1.10969	28.0711	25.2964	0.87004	0.827754	6.55134	20.1446	9.37604	57535.1	19.2735	8.9166	0.335088	0.957045	7.2997	55047.1	2165.71	2488.05	1.14884	1920.83	1983.64	1.0327	2.05982	0.71819	0.736363	0.65025	0.662628	0.923649	1.05603	1.30389	1.33359	1.21721	3978.27	24.0425	3262.76	27.9812
6072812	1	2015-06-24	2015-06-24	0	1	51	2019-02-18	1963-08-01	56	0	67.4	167.5	24.0232	20.6586	0.933964	21.5317	23.0541	0.844198	0.904216	4.94507	18.992	8.4117	53284.6	18.0855	7.95209	0.331017	0.928711	6.68512	50741.1	2141.03	2543.41	1.18794	1894.95	1902.24	1.00385	2.60555	0.778726	0.839957	0.570286	0.590609	0.82813	1.03867	1.33848	1.16844	1.16516	3933.8	23.3243	3046.83	22.4147
6165072	1	2015-08-03	2015-08-03	0	1	49	2019-02-18	1965-11-02	53	-1	88.8	172	30.0162	25.2687	1.34753	31.1809	23.1394	1.26664	1.38471	7.57767	22.4107	9.57427	66299.7	21.5137	9.11042	0.303516	0.897923	8.69458	63646.2	2219.87	2653.48	1.19533	1978.57	2057.88	1.04009	2.46827	0.845883	0.829271	0.688494	0.670051	1.07707	1.1849	1.35007	1.20384	1.17956	4882.04	24.4315	4107.13	29.7232
6168172	1	2015-07-03	2015-07-03	0	1	43	2019-02-18	1971-09-13	47	-1	70.6	162	26.9014	26.3053	1.23205	32.0565	26.0189	1.07475	1.01398	7.01233	19.6451	9.04203	51556.7	18.9036	8.63101	0.320839	0.84201	8.06436	49610.7	1877.03	1945.99	1.03674	1630.16	1539.99	0.944684	1.6446	0.694511	0.730236	0.55048	0.488747	0.72345	0.927236	1.17282	1.18349	1.20178	3979.29	24.7175	2789.25	32.7084
6186233	1	2015-06-05	2015-06-05	0	1	47	2019-02-18	1967-10-03	51	-1	67.5	169	23.6336	24.1961	1.16624	30.3077	25.9876	1.06546	0.979962	5.65758	17.7246	8.50777	50623.3	16.9664	8.04372	0.340351	0.972076	8.73349	48457.8	2100.01	2165.54	1.0312	1884.6	1741.93	0.924297	1.9665	0.761628	0.788284	0.446915	0.515059	0.684059	0.822995	1.08498	1.14601	1.13203	3482.05	24.0755	3446.33	28.0349
6252163	1	2015-07-20	2015-07-20	0	1	52	2019-02-18	1962-12-01	56	-1	77	178	24.3025	25.8039	1.34673	33.6614	24.9949	1.12381	1.2442	6.24047	17.9437	7.87221	56853	17.1188	7.46265	0.307074	0.972932	11.5032	54239.2	2279.2	2613.77	1.1468	2017.59	1932.07	0.957611	2.60585	0.759883	0.801204	0.58069	0.534517	0.859483	1.00503	1.19294	1.17884	1.13776	4456.76	23.5067	2969.16	28.1724
6292296	1	2015-09-23	2015-09-23	0	1	44	2019-02-18	1971-05-11	48	-1	76.5	166.5	27.5952	28.8821	1.31804	35.4895	26.9261	1.22345	1.36024	8.0489	19.8192	8.75387	54943.3	19.0257	8.34574	0.302435	0.838418	10.4092	52743.6	2066.57	2199.66	1.0644	1813.72	1640.53	0.904512	2.21132	0.720334	0.732986	0.562485	0.559434	0.79262	0.866021	1.11693	1.11247	1.1367	4181.28	24.1671	3170.18	30.3101
6344590	1	2016-05-18	2016-05-18	0	1	41	2019-02-18	1975-05-06	44	-1	74.6	174	24.64	23.8002	1.30405	27.9394	21.425	1.12392	1.16261	5.80999	18.6015	8.29711	56317.9	17.7268	7.84067	0.318209	0.963411	9.4672	53669.6	2094.84	2648.39	1.26424	1833.23	1977.94	1.07893	2.56283	0.846736	0.902745	0.582441	0.616117	0.970132	1.06791	1.26956	1.3398	1.31473	4229.02	23.4588	3743.94	27.4357
6347528	1	2016-05-24	2016-05-24	0	1	35	2019-02-18	1980-09-16	38	-1	76	170	26.2976	27.4244	1.13223	30.7029	27.1172	1.10904	1.17338	7.34116	19.4276	8.50464	56145.6	18.5442	8.02031	0.304983	0.881401	10.1446	53592.6	2237.79	2553.03	1.14087	1986.93	2044.93	1.02919	2.02546	0.77459	0.797046	0.582593	0.590767	0.815884	0.946631	1.30772	1.32259	1.30009	4227.12	24.5075	3338.75	30.7523
6351465	1	2016-08-09	2016-08-09	0	1	55	2019-02-18	1960-08-11	59	-1	78.4	170.5	26.9692	26.9037	1.26737	33.2149	26.2077	1.21527	1.34423	7.20208	19.5678	8.91868	56884.1	18.8091	8.49935	0.315151	0.916151	10.0728	54678.5	2098.02	2205.56	1.05126	1859.11	1766.88	0.950391	1.83617	0.785734	0.794172	0.560574	0.522573	0.799795	0.907578	1.15997	1.21045	1.18007	3981.61	24.5977	3814.29	25.111
6353604	1	2015-04-10	2015-04-10	0	1	43	2019-02-18	1971-04-27	48	-1	65	172	21.9713	17.2963	1.1503	22.0658	19.1827	0.951649	0.880425	3.66473	17.5232	8.2972	51840.5	16.6708	7.8275	0.35626	1.05396	6.11195	49319	2136.25	2521.57	1.18037	1875.84	1931.75	1.02981	2.26496	0.818213	0.858132	0.585258	0.595462	0.853378	0.993177	1.29255	1.23566	1.19242	3840.82	23.4799	3407.85	19.795
6353615	1	2015-07-14	2015-07-14	0	1	51	2019-02-18	1963-11-25	55	-1	77.9	179.5	24.1773	24.9888	1.23188	32.579	26.4467	1.03584	1.15979	6.06841	18.2161	8.05518	58692.8	17.3481	7.59354	0.314077	1.01196	10.8801	55895.9	2305.48	2796.87	1.21314	2036.7	2149.97	1.05561	2.40683	0.825249	0.883587	0.655057	0.601191	0.984874	1.15035	1.31304	1.25879	1.23655	4433.88	23.6822	3723.64	25.4948
6353619	1	2015-09-14	2015-09-14	0	1	50	2019-02-18	1964-12-29	54	-1	86.9	175.5	28.2141	27.5185	1.4825	35.7406	24.1083	1.37809	1.55908	7.77213	20.4711	9.20172	63051.6	19.6429	8.72765	0.309337	0.952765	10.963	60500.7	2280.79	2550.92	1.11844	2024.76	2050.44	1.01268	1.95476	0.8357	0.848925	0.541662	0.598992	0.814265	0.864086	1.34197	1.23298	1.23945	4208.77	24.6492	4018.81	27.4483
6353620	1	2015-04-23	2015-04-23	0	1	46	2019-02-18	1968-10-17	50	-1	82.2	175	26.8408	20.0547	1.25228	25.2639	20.1743	1.3054	1.33903	5.40694	21.554	10.2594	66009.2	20.4989	9.70234	0.361477	1.10702	7.03371	62777.9	2452.8	3231.33	1.3174	2197.57	2657.99	1.20951	2.24633	0.84274	0.924929	0.665932	0.68606	1.12775	1.37985	1.80484	1.36218	1.36534	4004.51	23.6409	3968.34	18.503
6353622	1	2015-04-14	2015-04-14	0	1	41	2019-02-18	1973-12-09	45	-1	72.7	169	25.4543	23.3614	0.99399	24.2536	24.4002	1.00741	1.07466	5.86952	19.2554	8.71953	54995.2	18.4769	8.30312	0.326197	0.931652	8.12631	52771.8	2069.35	2223.48	1.07448	1804.17	1699.57	0.942025	1.97561	0.764422	0.770706	0.532875	0.550374	0.887921	1.04967	1.03191	1.16199	1.20032	4315.5	24.1213	3514.93	22.9605
6353644	1	2015-07-14	2015-07-14	0	1	48	2019-02-18	1966-12-27	52	-1	68.5	161.5	26.2631	29.323	1.21162	37.343	30.8208	1.13677	1.17318	7.74207	18.6606	8.34868	48671.1	17.7578	7.88265	0.300142	0.782838	10.2735	46316.3	1961.85	2354.8	1.2003	1719.35	1736.08	1.00973	2.55148	0.78635	0.815455	0.610837	0.580433	0.904709	0.94716	1.25261	1.23541	1.27007	4316.03	23.9385	3145.36	32.7748
6353647	1	2015-08-25	2015-08-25	0	1	37	2019-02-18	1978-02-17	41	-1	82.1	172	27.7515	28.3999	1.23353	33.6907	27.3125	1.01447	0.990078	7.90516	19.93	9.21042	58960.9	19.1612	8.80326	0.317217	0.938456	9.58009	56686.5	2105.59	2274.46	1.0802	1847.97	1735.74	0.939271	2.09111	0.789719	0.804582	0.63428	0.563737	0.836439	0.983845	1.09455	1.13125	1.12401	4197.96	24.1133	3705.64	32.0032
6353651	1	2015-08-06	2015-08-06	0	1	45	2019-02-18	1969-10-15	49	-1	77.5	171	26.5039	23.2067	1.1529	26.7505	23.2029	1.02725	1.16569	6.17039	20.4184	9.01532	59705.5	19.6111	8.5991	0.324447	0.948715	8.00892	57344.7	2129.48	2360.82	1.10864	1896.94	1826.21	0.962712	2.29902	0.790416	0.827608	0.563296	0.64318	0.951874	0.97487	1.1844	1.13951	1.06951	4118.97	24.2013	3939.6	23.6162
6353652	1	2015-08-17	2015-08-17	0	1	43	2019-02-18	1972-06-24	47	-1	73.7	172	24.9121	28.2626	1.45297	35.7029	24.5724	1.3651	1.34133	7.02104	17.8211	8.14321	52721.9	17.0777	7.77262	0.312002	0.923025	11.8379	50522.6	2075.73	2199.3	1.05953	1835.22	1671.17	0.910607	2.19597	0.689466	0.73085	0.49979	0.547789	0.777436	1.04345	1.32495	1.084	1.03591	3756.21	23.7632	3068.07	34.0348
6353668	1	2015-07-14	2015-07-14	0	1	57	2019-02-18	1958-04-21	61	-1	60.8	168	21.542	18.9962	0.994399	21.9636	22.0873	0.898335	0.86225	4.12855	17.605	8.0605	49688.4	16.7234	7.59558	0.352595	0.995164	6.46171	47200	2076.52	2488.38	1.19834	1809.74	1820.59	1.00599	2.50313	0.767099	0.831072	0.587482	0.639775	0.815165	1.02786	1.17779	1.2296	1.20382	3869.63	23.1338	3050.25	22.521
6353669	1	2015-07-14	2015-07-14	0	1	42	2019-02-18	1973-03-16	46	-1	73.6	164	27.3647	25.5842	1.39869	34.222	24.4671	1.25688	1.28679	7.0218	20.424	9.11966	54932.4	19.5614	8.6414	0.315787	0.84934	8.49565	52612.4	2114.35	2320.02	1.09727	1867.48	1829.56	0.979695	1.98669	0.760318	0.823184	0.60707	0.660584	0.855048	0.928397	1.15643	1.21579	1.21096	4083.23	24.4962	3721.24	30.1603
6353681	1	2015-06-30	2015-06-30	0	1	47	2019-02-18	1968-04-24	51	0	61.5	168.2	21.7382	23.1193	1.17304	28.0098	23.878	0.949461	1.00254	5.0757	16.8787	7.41448	47751.9	16.1718	7.04664	0.324159	0.917087	8.95273	45752.1	1980.56	1999.77	1.0097	1722.14	1492.25	0.866512	1.96392	0.71227	0.696133	0.572098	0.588137	0.75103	0.801243	1.09887	1.01412	1.01725	3767.23	23.706	3247.11	25.2514
6353684	1	2015-06-19	2015-06-19	0	1	56	2019-02-18	1958-06-22	61	0	71.3	175	23.2816	24.5204	1.24685	31.2411	25.0559	1.1863	1.25367	5.73781	17.6624	7.90072	54091	16.878	7.45168	0.320067	0.980205	10.6126	51689	2201.15	2401.95	1.09122	1957.07	1924.56	0.983388	1.95585	0.774292	0.789831	0.562159	0.554252	0.768251	0.957769	1.29611	1.1404	1.2175	3665.37	23.9994	3217.85	27.7217
6353689	1	2015-08-20	2015-08-20	0	1	51	2019-02-18	1963-12-24	55	-1	90.6	180.5	27.8083	27.9374	1.16704	30.6095	26.2282	1.1696	1.32384	7.78142	20.0716	8.41731	65393.8	19.2398	7.98581	0.287174	0.93562	11.8258	62683.7	2378.34	2710.09	1.13949	2111.56	2083.35	0.986639	2.34925	0.746508	0.769353	0.556173	0.535201	0.848257	1.0312	1.35576	1.25237	1.2085	4611.63	23.9256	3517.51	35.4159
6353692	1	2015-07-09	2015-07-09	0	1	52	2019-02-18	1963-03-11	56	-1	82.1	168.5	28.9163	27.0701	1.35396	34.6239	25.5723	1.27404	1.31792	7.86193	21.1809	9.78776	60137.3	20.3734	9.37441	0.324191	0.920451	9.00511	57844.6	2159.74	2292.66	1.06154	1905.3	1744.58	0.915646	2.15404	0.724509	0.762713	0.552448	0.629154	0.85762	1.02506	1.20792	1.03386	1.09511	4085.41	23.9851	3610.67	29.925
6353693	1	2015-06-18	2015-06-18	0	1	57	2019-02-18	1957-06-29	62	0	63	163	23.7118	23.9869	1.13711	27.322	24.0275	1.08448	1.21514	5.63682	17.8628	7.67331	47459.6	16.9624	7.23222	0.305004	0.810366	9.02343	45067.5	1986.93	2392.09	1.20391	1744.84	1786.82	1.02406	2.50014	0.797051	0.837864	0.675141	0.698056	0.91027	1.04872	1.34559	1.18278	1.18275	3791.29	23.3989	2954.33	25.31
6353699	1	2015-06-10	2015-06-10	0	1	55	2019-02-18	1959-10-23	59	0	90	175.5	29.2205	32.3827	1.22297	42.2204	34.5227	1.06867	1.07636	9.45127	19.7349	9.00818	60783.9	18.9531	8.57935	0.293607	0.904316	12.0679	58376.1	2217.08	2407.76	1.086	1953.48	1825.5	0.934482	2.20891	0.744642	0.778651	0.555585	0.506301	0.65379	0.932146	1.16469	1.14304	1.22287	4922.55	25.0642	3682.51	34.8229
6353703	1	2015-09-09	2015-09-09	0	1	49	2019-02-18	1965-12-10	53	-1	68.2	170	23.5986	22.5188	1.28286	28.4021	22.1396	1.16662	1.22956	5.2924	18.2097	8.31228	52626.1	17.4249	7.86317	0.333205	0.962962	8.74278	50357.9	2047.45	2268.24	1.10783	1823.28	1815.4	0.995679	2.01999	0.802956	0.791875	0.541276	0.536151	0.872811	0.979368	1.18589	1.23235	1.24213	3588.17	24.0638	3380.46	22.3879
6353720	1	2015-08-20	2015-08-20	0	1	48	2019-02-18	1967-04-29	52	-1	67.3	176	21.7265	20.6554	1.02758	23.2873	22.6624	1.04686	0.99149	4.4842	17.2254	8.17421	53357.4	16.3902	7.73273	0.355912	1.10247	8.28278	50770.3	2270.44	2587.07	1.13946	2009.23	2063.97	1.02724	2.00263	0.73657	0.836504	0.608672	0.63168	0.877158	1.16572	1.39734	1.18144	1.18054	3713.93	23.7299	3208.31	23.1103
6353729	1	2015-10-13	2015-10-13	0	1	52	2019-02-18	1963-05-03	56	-1	77.3	173	25.8278	25.306	1.03427	27.2565	26.3534	0.918879	0.963191	6.42667	18.9692	8.48543	56772.8	18.1297	8.04448	0.311466	0.932186	9.04185	54260.4	2229.03	2512.39	1.12712	1989.32	1978.7	0.994662	2.22643	0.73951	0.808519	0.51995	0.554861	0.925919	1.11377	1.39914	1.14279	1.14482	3783.8	23.7396	3345.16	28.2512
6353764	1	2015-09-22	2015-09-22	0	1	51	2019-02-18	1964-01-14	55	-1	73.3	168.5	25.8169	24.4556	1.22598	31.4867	25.6829	1.1647	1.18792	6.40398	19.7822	8.89793	56166.1	18.9773	8.44564	0.327136	0.928812	8.59321	53880.9	2139.83	2285.14	1.0679	1869.07	1809.61	0.968187	1.75625	0.802756	0.825965	0.516952	0.536623	0.814027	0.989	1.1758	1.17446	1.15819	4528.56	24.9012	3280.73	27.94
6353774	1	2015-06-04	2015-06-04	0	1	90	2019-02-18	1925-04-24	94	-1	65.6	170.5	22.566	25.2581	1.02347	29.5647	28.8869	0.960201	0.897967	5.63187	16.6654	7.8882	48446.8	15.9668	7.49811	0.332274	0.965929	9.61962	46415.8	1998.88	2031	1.01607	1767.53	1553.95	0.879165	2.06207	0.71491	0.730413	0.506923	0.525683	0.856835	0.8785	0.94305	1.03254	1.10795	3724.34	23.9475	3038.91	27.0896
6353775	1	2015-06-04	2015-06-04	0	1	93	2019-02-18	1921-08-16	98	-1	59.7	166	21.665	24.3645	1.24238	29.52	23.7609	1.15653	1.26023	5.25224	16.3046	6.66982	44929.1	15.5376	6.277	0.28973	0.798381	10.7931	42815.5	1842.39	2113.6	1.14721	1615.03	1529.38	0.94697	2.56955	0.780842	0.81317	0.568593	0.612742	0.873293	0.971164	1.02881	1.25256	1.04872	3820.98	23.6514	2651.28	32.2233
6353777	1	2015-08-06	2015-08-06	0	1	70	2019-02-18	1944-07-17	75	-1	71.2	166	25.8383	27.0095	1.25962	33.4197	26.5315	1.2417	1.32964	6.99041	18.8909	8.40349	52055.6	17.9646	7.9005	0.305767	0.842572	10.1352	49503.3	2144.21	2552.32	1.19033	1916.45	2041.27	1.06513	2.24385	0.802537	0.813609	0.62449	0.627266	1.0044	1.18637	1.41221	1.28168	1.26723	3662.08	23.9147	2849.51	31.7601
6353778	1	2015-06-05	2015-06-05	0	1	70	2019-02-18	1944-06-19	75	-1	76.7	167	27.5019	29.2632	1.2259	37.3717	30.4851	1.00821	1.14469	7.88283	19.0549	8.20009	53142.1	18.2603	7.76674	0.282408	0.787607	10.6575	50926.2	2051.83	2215.92	1.07997	1811.73	1709.78	0.943728	2.108	0.762566	0.79885	0.536795	0.564777	0.965809	1.01373	1.17907	1.07072	1.168	4157.76	24.2783	3286.53	31.7203
6353779	1	2015-06-05	2015-06-05	0	1	77	2019-02-18	1937-11-12	81	-1	78.6	162.5	29.7657	30.6058	1.0544	33.943	32.1917	0.999582	1.13424	9.04901	20.5173	8.60783	54178.5	19.7787	8.23749	0.276745	0.730779	9.79591	52228	1859.51	1950.45	1.0489	1624.58	1470.57	0.905197	2.04265	0.670152	0.701125	0.584841	1.09788	0.82228	0.94852	1.12641	1.00747	1.0427	4373.09	25.228	3149.74	35.4655
6353784	1	2015-06-08	2015-06-08	0	1	69	2019-02-18	1945-07-12	74	-1	64	171	21.8871	22.6605	1.18722	28.7471	24.2138	0.968015	0.902968	4.92632	16.8134	7.84247	49164	16.1639	7.49731	0.342545	1.00164	8.51183	47264.7	1940.34	1899.29	0.978842	1691.08	1427.5	0.844137	1.89273	0.711269	0.714378	0.533857	0.544691	0.750244	0.773946	1.03791	0.979854	0.988951	3763.26	23.9643	3106.52	26.0879
6353785	1	2015-06-08	2015-06-08	0	1	72	2019-02-18	1942-12-05	76	-1	62.9	160	24.5703	23.5566	0.993745	25.7308	25.8927	0.86298	0.897839	5.80029	18.8225	8.26691	48185.7	17.9816	7.80823	0.317791	0.813546	7.11596	46033	1914.86	2152.67	1.12419	1692.28	1632.76	0.964833	2.33579	0.800689	0.795157	0.539737	0.519171	0.887713	0.97464	1.12142	1.17585	1.15734	3567.68	23.6509	3399.92	26.9229
6353786	1	2015-06-08	2015-06-08	0	1	61	2019-02-18	1953-07-01	66	-1	96.2	170	33.2872	28.6924	1.39669	36.2247	25.9361	1.17331	1.33109	9.60148	23.862	10.814	68961.3	22.9656	10.3347	0.310472	0.897264	8.65768	66370.5	2235.4	2590.79	1.15898	2000.87	2072.41	1.03576	2.21028	0.822828	0.845253	0.595398	0.649842	0.901476	1.11023	1.30474	1.28498	1.24424	4052.39	24.5222	4566.94	28.7588
6353788	1	2015-06-09	2015-06-09	0	1	63	2019-02-18	1952-01-07	67	-1	63	165.5	23.0009	20.2479	1.31051	25.9764	19.8216	1.08266	1.03025	4.65627	18.34	8.34591	50233.7	17.589	7.92749	0.34466	0.944033	6.89935	48176.7	1850.75	2057.05	1.11147	1617.82	1575.01	0.973544	2.06937	0.775275	0.792149	0.534073	0.534994	0.845492	0.902364	1.12461	1.18304	1.20398	4111.55	24.2411	3357.79	24.9737
6353789	1	2015-06-09	2015-06-09	0	1	61	2019-02-18	1953-08-26	66	-1	81	168.5	28.5289	23.4833	1.22552	30.7825	25.1179	1.10941	1.24701	6.80215	22.1638	9.85793	62928.1	21.2676	9.37072	0.328464	0.932583	7.45856	60383.4	2153.37	2544.67	1.18171	1889.77	1986.6	1.05124	2.11713	0.792288	0.841098	0.571262	0.609674	1.00493	1.09536	1.39057	1.29429	1.25466	4619.88	24.1683	4125.72	22.3682
6353791	1	2015-06-09	2015-06-09	0	1	63	2019-02-18	1952-02-05	67	-1	62.8	167	22.5178	20.622	1.19926	25.6125	21.357	1.15863	1.17688	4.65138	17.9041	8.01475	49932.7	16.9874	7.56875	0.336122	0.937411	7.82653	47376.3	2025.55	2556.4	1.26207	1775.1	1854.57	1.04477	2.8022	0.786532	0.830826	0.566105	0.63037	0.974265	1.19758	1.36986	1.234	1.24814	3959.83	23.0996	3148.22	23.8175
6353792	1	2015-06-09	2015-06-09	0	1	62	2019-02-18	1953-01-05	66	0	72.2	178	22.7875	19.766	1.0219	21.5338	21.0724	1.01142	1.02211	4.45832	18.0972	8.38671	57339.2	17.2898	7.94506	0.348658	1.10469	7.77326	54781	2263.67	2558.27	1.13014	2040.69	2061.15	1.01003	2.22944	0.791864	0.793711	0.684739	0.632457	0.94779	1.17335	1.27008	1.19344	1.14521	3708.68	23.9052	3460.9	21.1503
6353793	1	2015-06-09	2015-06-09	0	1	81	2019-02-18	1934-01-15	85	-1	68.9	174.5	22.6271	26.8643	1.17455	33.943	28.8988	0.867504	0.904034	6.08855	16.5756	7.45374	50473	15.8438	7.0499	0.311569	0.948736	11.0735	48244.7	2128.29	2228.31	1.047	1879.42	1698.76	0.903876	2.12786	0.733314	0.772865	0.519453	0.544822	0.830624	0.884882	1.04394	1.10286	1.06338	3972.44	24.0093	3533.11	27.3098
6353794	1	2015-06-09	2015-06-09	0	1	67	2019-02-18	1948-04-16	71	-1	54.3	174	17.935	16.8403	0.736386	15.1057	20.5133	0.835191	0.742765	3.00295	14.8289	7.05918	44896.1	13.9964	6.59379	0.367649	1.11309	6.708	42375.4	2163.33	2520.64	1.16517	1934.37	1914.71	0.989834	2.64653	0.769453	0.802551	0.525371	0.527449	0.786054	1.01852	1.10805	1.26038	1.19109	3468.6	23.0854	2887.03	19.6476
6353796	1	2015-06-08	2015-06-08	0	1	91	2019-02-18	1923-11-02	95	0	66.3	167.5	23.6311	30.1269	1.11198	35.7292	32.1312	0.850115	0.966229	7.06323	16.3817	6.80001	45960.9	15.6036	6.39483	0.270611	0.759232	12.3553	43777.9	2038.3	2182.96	1.07097	1829.25	1764.06	0.964363	2.00388	0.745188	0.731651	0.545317	1.06166	0.995403	1.27539	1.08686	1.06344	1.07991	3474.98	24.7691	2569.17	33.5656
6353798	1	2015-06-08	2015-06-08	0	1	85	2019-02-18	1930-03-18	89	-1	75	171	25.6489	30.4803	0.941845	31.2324	33.1609	0.804274	0.964744	8.08199	18.4335	7.44725	53901.3	17.695	7.04067	0.274501	0.80267	11.6568	51741.9	2051.04	2159.34	1.0528	1832.44	1688.92	0.921681	2.15193	0.759115	0.740679	0.569277	0.553396	0.893588	1.19028	1.09501	1.09638	1.10217	4035.03	24.5276	3054.03	34.1937
6357817	1	2016-05-19	2016-05-19	0	1	57	2019-02-18	1958-06-11	61	0	74.3	178	23.4503	24.5814	0.932582	27.6776	29.6785	1.09496	1.12105	5.71814	17.5439	8.01083	55586	16.7578	7.59047	0.323683	1.02556	10.6175	53095.5	2188.01	2490.47	1.13824	1922.43	1933.73	1.00588	2.09628	0.765418	0.800144	0.602445	0.588482	0.859912	0.929486	1.30349	1.19668	1.22212	4181.96	24.0142	3477.58	26.655
6375164	1	2016-05-23	2016-05-23	0	1	46	2019-02-18	1969-11-19	49	-1	78.9	171.5	26.8256	25.4297	1.29331	31.0048	23.9733	1.18856	1.24743	6.83961	20.0565	9.00668	58990.7	19.2841	8.58734	0.320118	0.941538	9.20402	56718.8	2179.65	2271.96	1.04235	1937.16	1788.56	0.923292	1.99345	0.738812	0.755723	0.527684	0.55038	0.801706	0.959275	1.17388	1.09116	1.1184	4160.67	24.5592	3869.78	28.0406
6399232	1	2015-10-26	2015-10-26	0	1	46	2019-02-18	1969-02-25	50	-1	77.7	181	23.7172	22.2642	0.930706	23.4947	25.244	0.838302	0.812491	5.27474	18.4168	8.57597	60335.3	17.6167	8.14781	0.34354	1.12547	8.19455	57713.9	2439.27	2621.39	1.07466	2170.09	2008.35	0.925465	2.27751	0.749958	0.784948	0.591108	0.571955	0.758603	0.937388	1.1848	1.10607	1.08541	4334.86	23.7022	4049.88	23.5628
6442334	1	2016-09-28	2016-09-28	0	1	53	2019-02-18	1962-12-09	56	-1	93.5	178	29.5102	28.4224	1.35242	34.7525	25.6966	1.30188	1.51576	8.36181	21.058	9.3955	66720	20.1743	8.90973	0.301921	0.956605	11.2819	63920.3	2424.53	2799.76	1.15476	2172.09	2253.74	1.03759	2.16289	0.779582	0.834635	0.699803	0.667026	1.00736	0.985161	1.29956	1.28069	1.22972	4450.74	24.2913	3821.29	28.6613
6464771	1	2016-06-04	2016-06-04	0	1	4	2019-02-18	2012-06-04	7	-1	13	92	15.3592	27.8846	0.637266	24.0652	37.7631	0.513146	0.591197	3.99461	10.3309	3.39199	8744.08	9.76731	3.1967	0.20813	0.176161	5.51204	8267.05	905.069	477.029	0.527063	713.543	279.386	0.391547	1.03194	0.293807	0.273859	0.409041	0.38972	0.43439	0.535365	0.491866	0.412738	0.396735	2021.08	24.4831	481.066	29.6244
6553651	1	2016-05-19	2016-05-19	0	1	43	2019-02-18	1972-07-16	47	-1	74.2	170	25.6747	23.6635	1.28734	29.025	22.5465	1.20428	1.24791	5.98404	19.304	8.69439	55788.7	18.4198	8.20129	0.31943	0.923153	8.80866	53233.2	2174.47	2555.48	1.17522	1934.37	2031.1	1.05001	2.18395	0.831824	0.834378	0.598578	0.63634	0.861009	1.03301	1.36954	1.32917	1.20953	3881.93	23.856	3210.23	26.6229
6574450	1	2016-04-29	2016-04-29	0	1	50	2019-02-18	1966-01-18	53	-1	73.4	175.5	23.831	20.524	1.18954	25.3388	21.3013	0.997414	1.05452	4.89522	18.9559	8.31132	58384.8	18.1192	7.88368	0.330817	1.01892	7.76909	55807.6	2193.19	2577.18	1.17508	1931.58	1934.45	1.00148	2.45686	0.809622	0.85259	0.6188	0.619325	0.965298	1.08807	1.1892	1.17146	1.16618	4487.47	23.6785	3890.25	23.6695
6634263	1	2016-09-08	2016-09-08	0	1	43	2019-02-18	1973-03-23	46	-1	72.2	173.5	23.9849	22.7911	0.961171	25.1422	26.1579	0.821533	0.886676	5.48409	18.5783	8.38933	55925	17.8716	7.99029	0.333138	1.00282	7.95395	53797.4	2071.74	2127.57	1.02695	1824.87	1698.15	0.930557	1.73946	0.738225	0.768607	0.515823	0.559429	0.777682	0.870388	1.11245	1.11852	1.15716	3848.5	24.2729	3839.03	21.7526
6636106	1	2015-10-14	2015-10-14	0	1	38	2019-02-18	1977-01-16	42	-1	67	172	22.6474	20.0268	1.04512	21.5703	20.6391	1.16953	1.03279	4.5273	18.0789	8.73294	53484.6	17.2888	8.30207	0.36658	1.08449	7.34879	51147.1	2114.35	2337.59	1.10558	1865.88	1841.58	0.986973	1.99631	0.763226	0.844083	0.613525	0.662781	0.811899	0.884276	1.20516	1.1645	1.15937	3764.96	23.8635	3212.15	22.9171
6637015	1	2015-11-05	2015-11-05	0	2	45	2019-02-18	1970-07-30	49	-1	70	170	24.2215	34.1566	0.942256	35.144	37.2977	0.932983	0.880549	9.0227	17.393	7.89162	50265.8	16.4195	7.42171	0.306411	0.885527	12.9168	47452.4	2207.52	2813.44	1.27448	1956.27	2117.47	1.0824	2.76999	0.764839	0.812061	0.617982	0.681422	1.05009	1.48549	1.54724	1.221	1.22658	4008.87	23.2914	2795.78	41.807
6637016	1	2015-11-03	2015-11-03	0	2	47	2019-02-18	1968-03-21	51	-1	63	156	25.8876	30.794	1.14306	33.3826	29.2047	1.22698	1.29398	7.94162	17.8479	7.42206	43434.7	17.0339	7.07649	0.273355	0.665236	10.988	41453.7	1795.4	1981.03	1.10339	1561.67	1411.83	0.90405	2.43526	0.664223	0.706862	0.588961	0.540823	0.975631	1.1935	1.37642	1.03188	0.985509	3413.01	23.4897	2191.07	41.6969
6637017	1	2015-11-17	2015-11-17	0	2	48	2019-02-18	1967-05-01	52	0	57	160	22.2656	27.2321	1.19504	31.4642	26.3291	1.20781	1.35935	6.33639	16.9317	7.23797	43345.2	16.0248	6.79498	0.305178	0.781256	10.9861	41023.5	1917.65	2321.67	1.21069	1679.14	1761.69	1.04917	2.3478	0.802153	0.822446	0.659312	0.722592	1.04763	1.22903	1.4524	1.20991	1.19096	3738.26	23.7127	2566.53	28.558
6637018	1	2015-11-05	2015-11-05	0	2	49	2019-02-18	1966-08-20	53	51	67.5	158	27.0389	39.6808	1.13177	44.2341	39.0841	0.993508	1.04467	11.0286	16.7648	6.96656	41851.6	15.8691	6.54385	0.242016	0.604168	15.0518	39615.6	1940.34	2236.03	1.15239	1691.88	1554.28	0.918673	2.74383	0.702603	0.721794	0.58462	0.553166	0.899815	0.969398	1.23228	1.10735	1.11587	3765.65	23.179	2149.78	51.0196
6637038	1	2015-10-22	2015-10-22	0	1	44	2019-02-18	1971-12-09	47	-1	77	177	24.5779	23.6755	1.06274	27.1585	25.5552	0.956929	1.07884	5.87955	18.9543	8.14776	59382	18.1105	7.73223	0.314601	0.985615	9.38595	56738.5	2323.4	2643.49	1.13777	2034.31	1970.93	0.968843	2.32654	0.799397	0.818331	0.620207	0.666004	0.886234	1.0755	1.23639	1.10931	1.12195	4567.42	23.5221	3605.95	25.7195
6637039	1	2015-10-21	2015-10-21	0	1	61	2019-02-18	1954-08-19	65	-1	73.2	169.5	25.4784	23.5788	1.18771	30.0845	25.33	1.01808	1.05558	5.99517	19.431	8.8166	55825.6	18.5846	8.3891	0.329263	0.945982	8.14421	53393.9	2164.52	2431.68	1.12342	1906.1	1772.66	0.929993	2.55017	0.774665	0.769526	0.637145	0.613452	0.771452	0.92248	1.17213	1.0843	1.08621	4361.61	23.5822	3729.02	24.5444
6658743	1	2016-06-29	2016-06-29	0	1	71	2019-02-18	1945-03-10	74	-1	64.1	171.5	21.7936	21.8062	1.4453	28.301	19.5814	1.22321	1.39819	4.73105	16.9649	7.32306	49897.6	16.083	6.87335	0.315383	0.927613	9.98481	47303.8	2122.31	2593.77	1.22214	1876.24	1922.73	1.02478	2.72694	0.776741	0.803412	0.609226	0.66059	0.861184	1.14632	1.18126	1.29186	1.2384	4085.62	23.3391	2717.17	20.4433
6658749	1	2016-06-29	2016-06-29	0	1	81	2019-02-18	1934-12-01	84	-1	56.2	161.5	21.5472	24.3956	0.829081	23.5192	28.3678	0.922212	1.00519	5.34395	16.5614	6.8405	43195.9	15.7652	6.45321	0.299492	0.781141	9.22515	41119.1	1913.27	2076.82	1.08548	1676.75	1544.44	0.921091	2.25088	0.700322	0.722161	0.548419	0.586738	0.863781	1.16925	1.2667	1.05883	1.09909	3682.48	23.8343	2324.32	30.5923
6658756	1	2016-06-28	2016-06-28	0	1	89	2019-02-18	1927-03-24	92	-1	72	165	26.4463	29.4707	1.13324	34.4023	30.3575	0.980111	1.10451	7.779	18.6167	7.95582	50684	17.8564	7.55188	0.285555	0.777425	10.5886	48614	2003.65	2069.96	1.03309	1764.35	1522.66	0.863014	2.28701	0.685634	0.699541	0.566033	0.50729	0.745067	0.871449	1.05052	1.03244	1.06218	3779.62	23.7187	2979.63	31.9292
6658774	1	2016-09-02	2016-09-02	0	1	43	2019-02-18	1972-10-30	46	-1	72	172	24.3375	23.2895	1.13238	28.8654	25.491	1.18665	1.29494	5.65535	18.6275	8.40905	55107.5	17.7113	7.91887	0.325378	0.962597	9.36295	52397.1	2199.16	2710.39	1.23247	1956.27	2103.11	1.07506	2.50021	0.855313	0.851684	0.700579	0.613721	0.93263	1.07304	1.39676	1.23701	1.27369	4231.14	23.7925	2840.8	24.292
6658776	1	2016-06-17	2016-06-17	0	1	53	2019-02-18	1963-04-10	56	0	79.6	175	25.9918	25.6912	1.19734	29.5349	24.667	1.03684	1.0511	6.71527	19.4232	8.7751	59483.5	18.7035	8.37891	0.322367	0.987249	9.4181	57279.4	2117.93	2204.12	1.04069	1872.65	1669.62	0.891583	2.17912	0.691168	0.750197	0.517403	0.518545	0.76217	0.804677	1.09501	1.11982	1.08677	4235.49	24.1115	3494.56	28.1533
6658801	1	2016-08-05	2016-08-05	0	1	53	2019-02-18	1963-06-11	56	0	66.4	161	25.6163	30.2602	1.16635	36.8561	31.5995	0.95502	1.02855	7.72758	17.8095	7.7051	46164	17.0332	7.3119	0.285439	0.739888	10.6026	44151.7	1930.79	2012.3	1.04222	1701.83	1495.97	0.879034	2.25515	0.64356	0.695146	0.526478	0.535064	0.845745	0.922819	1.09289	1.06387	1.058	3831.34	24.05	2359.79	33.9958
6658819	1	2016-05-16	2016-05-16	0	1	47	2019-02-18	1969-04-04	50	-1	83.5	177	26.6526	23.2148	1.24868	30.0407	24.0581	1.07145	1.24487	6.20279	20.5164	9.04708	64275.7	19.6011	8.54347	0.320549	1.00425	8.80731	61408.4	2355.25	2867.26	1.21739	2092.85	2319.89	1.10849	2.08599	0.903831	0.900075	0.642514	0.616923	0.877157	1.05689	1.46808	1.33651	1.32328	4078.23	23.8255	3774.32	22.0383
6658865	1	2016-07-01	2016-07-01	0	1	53	2019-02-18	1963-03-23	56	-1	78.4	176	25.3099	25.3135	0.951403	26.8745	28.2472	0.928632	0.993547	6.37874	18.8202	8.56199	58297.4	18.0659	8.15567	0.322232	0.998147	9.41227	55960.9	2188.41	2336.52	1.06768	1968.61	1921.99	0.976314	1.88599	0.756013	0.814857	0.610106	0.593971	1.01447	1.15876	1.24094	1.09918	1.08646	3658.88	24.2564	3908.51	26.0586
6658867	1	2016-06-15	2016-06-15	0	1	38	2019-02-18	1977-11-23	41	-1	61	176	19.6927	17.1006	0.916684	17.4147	18.9975	0.87235	0.837526	3.34825	16.2314	7.77015	50278.5	15.5097	7.36402	0.373947	1.15834	6.59599	48042.9	2125.1	2235.58	1.05199	1883.4	1795.39	0.953268	1.82127	0.77313	0.817252	0.550409	0.615761	0.92744	1.00861	1.11681	1.06705	1.13708	3433.72	23.9024	3817.58	17.0177
6659012	1	2015-10-27	2015-10-27	0	1	50	2019-02-18	1965-06-09	54	0	62.7	170.5	21.5684	24.8948	0.878926	24.5645	27.9483	0.798779	0.814977	5.35174	16.1457	7.19539	46935.9	15.3636	6.77879	0.314292	0.913654	9.62681	44662.4	2075.33	2273.54	1.09551	1824.47	1742.33	0.954976	2.11759	0.731956	0.747735	0.576198	0.558837	0.847096	1.0253	1.08024	1.18339	1.17712	3619.96	23.6031	2718.04	27.5101
6659063	1	2016-03-22	2016-03-22	0	1	43	2019-02-18	1972-10-16	46	-1	69.1	162.5	26.168	23.7779	1.08906	28.2392	25.9299	1.04036	1.06097	6.16925	19.7761	8.7693	52221.2	18.9173	8.31914	0.317912	0.839486	7.52275	49953.6	2055.02	2267.68	1.10348	1793.41	1664.44	0.928084	2.30591	0.774477	0.771384	0.589101	0.512201	0.827604	0.800036	1.09888	1.13534	1.11868	4340.47	24.0235	3427.39	27.1312
6659086	1	2015-10-30	2015-10-30	0	1	56	2019-02-18	1959-07-24	60	0	73.7	181	22.4963	19.7584	1.0073	22.2526	22.0912	1.00913	0.909294	4.43548	18.0131	8.65212	59012.6	17.2693	8.20667	0.364801	1.19513	7.63574	56576.1	2298.31	2436.53	1.06014	2066.57	1985.91	0.960972	1.94447	0.777458	0.796629	0.531658	0.538879	0.823667	0.912514	1.06641	1.14563	1.19452	3926	24.159	3652.66	21.9596
6659099	1	2015-11-12	2015-11-12	0	1	48	2019-02-18	1967-10-02	51	-1	84.6	172	28.5965	26.5379	1.21762	31.1508	25.5833	1.1762	1.30024	7.56373	20.9379	9.12908	61942.6	20.1446	8.71212	0.304656	0.901295	9.46653	59595.7	2184.83	2346.88	1.07417	1960.65	1817.52	0.926996	2.36136	0.771731	0.804973	0.543932	0.582015	0.839227	0.849724	1.15069	1.10768	1.11123	4173.82	24.3237	3654.74	30.9084
6659179	1	2016-03-15	2016-03-15	0	1	50	2019-02-18	1965-07-07	54	-1	69.4	171.5	23.5956	17.8188	1.05405	20.7709	19.7058	1.0826	1.10605	4.14742	19.1282	8.75007	56260.2	18.3569	8.35731	0.354189	1.04175	6.26912	53991.9	2063.38	2268.38	1.09935	1810.54	1728.7	0.954799	2.13444	0.787843	0.838662	0.630768	0.608649	0.980427	1.03189	1.08527	1.07891	1.07788	3953.45	23.7682	3647.27	18.9425
6659414	1	2015-10-29	2015-10-29	0	1	49	2019-02-18	1965-10-03	53	-1	57	166	20.6852	21.3734	1.10655	27.4111	24.7717	0.972777	0.979482	4.34375	15.9794	7.12388	44032.8	15.1339	6.66299	0.322115	0.88762	8.50288	41703.1	2013.21	2329.71	1.15721	1757.58	1769.04	1.00652	2.19327	0.794184	0.816373	0.56538	0.599687	0.890656	0.94625	1.18743	1.23631	1.22747	3662.5	23.45	2547.1	26.1335
6659415	1	2015-09-24	2015-09-24	0	1	44	2019-02-18	1971-04-10	48	-1	78.4	175	25.6	21.8856	1.27874	25.9816	20.3182	1.26413	1.29574	5.64119	20.1346	9.35637	61662.1	19.2895	8.88258	0.346976	1.06261	8.15678	59074.1	2293.13	2587.98	1.12858	2062.59	2154.33	1.04448	1.88095	0.73061	0.782396	0.6194	0.614155	0.829934	1.09304	1.39369	1.22813	1.29882	3700.59	24.2449	3564.58	22.3205
6659488	1	2015-10-22	2015-10-22	0	1	51	2019-02-18	1964-02-15	55	-1	60.1	176.5	19.2923	19.802	1.13704	24.7594	21.7754	1.04904	0.946279	3.80541	15.4118	7.44226	48011.4	14.7791	7.08114	0.367044	1.14342	8.66675	46040.2	1945.52	1971.17	1.01319	1703.03	1541.08	0.904908	1.77362	0.769251	0.779516	0.547463	0.549289	0.781105	0.891442	1.10298	1.05671	1.01811	3562.41	23.9958	3320.96	21.7729
6659489	1	2015-10-21	2015-10-21	0	1	56	2019-02-18	1959-06-06	60	-1	68.7	164.5	25.3878	23.7461	1.40497	31.0046	22.0678	1.25119	1.35209	6.04106	19.3992	8.74298	52494.7	18.5054	8.25474	0.325146	0.879854	8.50301	50076.1	2032.72	2418.55	1.18981	1776.29	1879.76	1.05825	2.1011	0.800736	0.847614	0.561899	0.58066	0.965303	1.03668	1.33723	1.30894	1.31429	4149.5	23.9513	3077.6	24.2284
6659492	1	2015-09-28	2015-09-28	0	1	42	2019-02-18	1973-01-18	46	-1	66.4	163	24.9915	21.9907	0.935059	23.8371	25.4926	0.985359	1.07734	5.5399	19.6521	8.63397	52213.7	18.7914	8.19337	0.327846	0.871054	7.00939	49926.8	2017.59	2286.88	1.13347	1769.12	1779.24	1.00572	2.04312	0.812293	0.796011	0.627217	0.618304	0.970038	1.09438	1.30443	1.18892	1.14534	3884.82	23.8796	3317.68	21.9761
6659498	1	2015-09-23	2015-09-23	0	1	54	2019-02-18	1961-05-02	58	-1	64.8	174.5	21.2806	22.2194	1.04886	24.5923	23.4468	1.04108	1.03122	4.68513	16.4006	7.57632	49940.3	15.6292	7.19424	0.338065	1.02942	9.4293	47591.2	2143.42	2349.1	1.09596	1910.48	1834.61	0.960289	2.20869	0.686609	0.804746	0.587267	0.656465	0.967625	1.15291	1.29933	1.08491	1.03501	3550.35	23.6568	2787.61	25.754
6659843	1	2016-09-26	2016-09-26	0	1	54	2019-02-18	1962-08-04	57	-1	64.5	163	24.2764	26.429	1.15444	32.0237	27.7396	1.09452	1.23704	6.42216	17.8775	7.60249	47498.8	17.1343	7.22538	0.297629	0.790772	10.0329	45524.2	1885.79	1974.55	1.04707	1642.1	1446.81	0.88107	2.16566	0.700553	0.766067	0.600353	0.564916	0.855324	0.855049	0.989682	1.0646	1.04959	4062.52	24.1823	2586.05	30.3865
6659844	1	2016-09-14	2016-09-14	0	1	43	2019-02-18	1973-01-30	46	-1	70.6	173	23.5892	23.9532	1.09412	26.97	24.6498	1.02503	1.06243	5.70121	18.1002	8.14578	54172.2	17.3423	7.72712	0.327571	0.980387	9.25468	51903.8	2094.84	2268.39	1.08285	1871.46	1706.57	0.911893	2.5151	0.740695	0.759363	0.5243	0.511863	0.719704	0.790148	0.927404	1.17059	1.17232	3615.15	23.4747	3115.03	27.6442
6659884	1	2016-09-22	2016-09-22	0	1	54	2019-02-18	1962-06-04	57	0	86	160	33.5938	30.4207	1.14445	33.5432	29.3095	0.979903	1.34885	10.6145	24.2779	9.56057	62151.5	23.5402	9.1644	0.272801	0.69837	8.56633	60263	1948.31	1888.49	0.9693	1717.36	1505.71	0.876757	1.65746	0.731097	0.741572	0.541106	0.506843	0.79298	0.764589	0.994473	1.12338	1.14973	4331.63	25.6053	3631.94	30.2475
6659885	1	2016-09-19	2016-09-19	0	1	49	2019-02-18	1967-08-15	52	-1	68.7	174	22.6912	19.3611	1.13961	23.5536	20.6681	1.00281	0.975192	4.40368	18.3413	8.71174	55530	17.4092	8.20695	0.361679	1.09502	7.06167	52708.2	2233.01	2821.83	1.26369	1996.49	2250.99	1.12747	2.41349	0.848288	0.868563	0.692115	0.722003	1.10009	1.12413	1.2994	1.33474	1.35986	3766.03	23.5318	3908.74	19.1114
6659890	1	2016-09-07	2016-09-07	0	1	50	2019-02-18	1966-02-21	53	-1	78.5	167.5	27.9795	22.3666	1.11078	26.6851	24.0238	1.08249	1.13929	6.27069	21.7653	9.84854	61065.3	20.7963	9.32886	0.333418	0.935445	6.86126	58346.5	2277.21	2718.84	1.19394	2037.1	2217.01	1.08831	2.09006	0.793842	0.864501	0.623981	0.725206	0.969302	1.27811	1.45713	1.24647	1.23009	4101	24.254	3854.56	25.3698
6659893	1	2016-09-01	2016-09-01	0	1	57	2019-02-18	1959-07-31	60	0	60.9	165.5	22.2342	24.9511	1.17807	29.5868	25.1146	1.09691	1.15663	5.63194	16.9399	7.47222	46398.9	16.0914	7.03697	0.316493	0.866883	10.0207	44074.9	1934.77	2324	1.20118	1676.75	1650.39	0.98428	2.61069	0.83926	0.852143	0.640902	0.563283	0.763145	0.880636	1.18395	1.18298	1.16825	3872.21	23.1282	2677.72	27.8338
6659895	1	2016-08-30	2016-08-30	0	1	53	2019-02-18	1963-06-28	56	-1	86.6	173	28.9351	23.4624	1.09677	25.273	23.0431	0.981335	1.07449	6.72731	21.9454	9.64392	65680.3	21.1331	9.19139	0.317655	0.950709	7.46273	63249.3	2191.6	2431.02	1.10924	1959.85	2000.35	1.02067	1.85837	0.800291	0.809351	0.603904	0.55104	0.928084	0.899962	1.29422	1.23273	1.23803	3963.85	24.3366	4266.87	25.4028
6659896	1	2016-09-01	2016-09-01	0	1	48	2019-02-18	1968-08-04	51	-1	78.2	168	27.7069	22.1891	1.38906	29.506	21.2417	1.13857	1.22973	6.23685	21.8708	9.83959	61728.2	20.9293	9.33468	0.336908	0.950889	6.99015	59070.8	2170.89	2657.44	1.22412	1945.92	2155.14	1.10752	2.23273	0.921314	0.977042	0.720462	0.757739	1.09	1.22787	1.36808	1.22226	1.2466	4084.07	24.3548	4101.09	24.1738
6660491	1	2017-09-22	2017-09-22	0	1	46	2019-02-18	1971-05-25	48	-1	79.8	178.5	25.0453	21.9485	1.38746	28.1115	20.2611	1.05606	1.08781	5.52628	19.6521	9.03522	62616.2	18.7601	8.53617	0.340829	1.08596	8.28334	59773.8	2373.17	2842.37	1.19771	2126.69	2335.9	1.09837	2.05484	0.900849	0.903002	0.691341	0.695431	0.913865	1.0503	1.43469	1.32554	1.23717	3915.85	23.9634	3649.12	23.5475
6742895	1	2016-03-24	2016-03-24	0	1	51	2019-02-18	1964-07-05	55	0	102.1	181.5	30.9936	28.8202	1.04814	30.8815	29.4632	0.880043	0.904274	9.02941	22.3007	9.96381	73463.6	21.3382	9.42923	0.304231	1.00221	9.50304	70292.7	2606.5	3170.9	1.21653	2353.26	2617.07	1.11211	2.18692	0.824269	0.886878	0.683252	0.682163	1.13218	1.23118	1.46593	1.23746	1.28831	4881.95	24.7815	3978.11	32.7979
6925850	1	2016-10-09	2016-10-09	0	1	38	2019-02-18	1978-09-15	40	-1	84.5	171.5	28.7295	22.3769	1.36645	26.7773	19.5962	1.34185	1.32593	6.4752	22.4618	10.1568	66065.1	21.6239	9.70114	0.337672	0.993168	7.26422	63600.7	2163.33	2464.37	1.13916	1918.05	1989.27	1.03713	1.93698	0.776197	0.865546	0.612884	0.637413	0.825681	0.920627	1.29084	1.28612	1.26192	4184.78	24.4419	3836.93	28.3227
6925861	1	2016-10-26	2016-10-26	0	1	52	2019-02-18	1964-02-19	55	0	75.4	171.5	25.6356	24.8118	1.25296	30.983	24.7278	1.38079	1.30867	6.36714	19.2946	8.84333	56749.7	18.4921	8.3798	0.326882	0.961432	9.43149	54389.4	2126.69	2360.32	1.10986	1877.43	1971.49	1.0501	1.55994	0.74456	0.880353	0.576077	0.615122	0.899929	1.08369	1.33357	1.26869	1.23896	3754.75	24.7492	3441.85	31.151
7020565	1	2015-10-12	2015-10-12	0	1	49	2019-02-18	1966-02-18	53	-1	87.6	178	27.648	28.4816	1.42976	36.0393	25.2066	1.35571	1.45739	7.80873	19.608	8.87562	62126	18.8085	8.44028	0.305276	0.967236	11.8954	59593	2339.72	2533.09	1.08265	2077.32	2050.95	0.987307	1.8374	0.775633	0.833336	0.646977	0.586105	0.854365	0.964854	1.40835	1.16698	1.15175	4054.6	24.4959	3643.44	31.7389
7020732	1	2015-05-29	2015-05-29	0	1	58	2019-02-18	1957-02-01	62	0	76.4	170.5	26.2812	19.2978	1.33826	23.834	17.8097	1.27098	1.371	5.03969	21.0757	9.39099	61267.5	20.1313	8.92983	0.339781	0.987751	6.71591	58522.1	2263.67	2745.33	1.21278	1995.29	2028.71	1.01675	2.67024	0.831027	0.829718	0.600744	0.563925	0.975346	1.14557	1.28282	1.22053	1.19652	4267.04	23.35	3965.92	20.4201
7034116	1	2015-11-06	2015-11-06	0	2	59	2019-02-18	1956-04-27	63	51	55	164	20.4491	33.5465	0.832564	34.8774	41.8916	0.760667	0.711909	6.97697	13.8209	6.17234	37172.8	13.1942	5.86908	0.287009	0.771938	13.7501	35487	1857.92	1685.71	0.907312	1604.68	1172.08	0.730415	2.02822	0.566575	0.592783	0.447069	0.495116	0.668336	0.855361	1.05141	0.844078	0.805109	3373.92	23.5257	2149.98	35.773
7034832	1	2014-10-22	2014-10-22	0	1	2	2019-02-18	2011-11-30	7	-1	11.5	87.7	14.952	27.0156	0.612639	23.3182	38.0619	0.555805	0.735423	4.07217	11.0013	3.45589	8461.39	10.4541	3.28204	0.219506	0.168828	5.1633	8040.52	799.152	420.868	0.526642	611.21	235.487	0.38528	0.98637	0.270127	0.269961	0.433683	0.42996	0.497676	0.564367	0.478563	0.386546	0.361546	2179.31	24.7118	383.8	30.351
7040114	1	2016-08-15	2016-08-15	0	1	47	2019-02-18	1968-10-05	50	-1	73.8	178	23.2925	25.9389	1.24378	34.148	27.455	1.16822	1.33872	6.09393	17.3995	7.38931	55128.6	16.6368	7.0087	0.300899	0.95337	12.4046	52712	2199.16	2416.59	1.09887	1923.22	1727.42	0.898189	2.49754	0.732567	0.769108	0.548308	0.543923	0.765958	0.844201	1.06887	1.0996	1.08005	4714.55	23.7613	3440.74	26.6293
7041233	1	2016-08-25	2016-08-25	0	1	53	2019-02-18	1962-10-05	56	-1	68.1	173	22.7539	22.5296	1.23595	30.0312	24.2982	1.06486	1.05271	5.16379	17.7563	8.06656	53142.7	16.9767	7.64392	0.33594	1.00543	8.84851	50809.5	2170.49	2333.26	1.07499	1908.89	1827.04	0.957123	1.93506	0.763908	0.78938	0.56822	0.56459	0.854431	0.967621	1.22254	1.11916	1.13701	4175.3	24.033	3674.04	24.025
7043309	1	2015-09-14	2015-09-14	0	1	50	2019-02-18	1965-08-23	54	-1	78.7	175.5	25.5517	25.6137	1.43678	33.8591	23.5659	1.44205	1.61317	6.53665	18.9835	8.26693	58469.6	18.1562	7.8076	0.30556	0.941133	11.3209	55921.6	2288.75	2547.97	1.11326	2041.08	2030	0.994571	2.09137	0.781082	0.789476	0.540884	0.56722	0.833159	0.987823	1.18487	1.28516	1.26176	4176.9	24.2418	4108.38	27.0722
7051699	1	2015-06-05	2015-06-05	0	1	85	2019-02-18	1930-01-01	89	-1	67.3	161.5	25.803	28.2618	1.14893	30.6473	26.6747	0.920273	1.08937	7.26507	18.4412	7.53731	48098.9	17.6361	7.1619	0.277561	0.723941	9.98239	45998.9	1926.41	2099.95	1.09008	1691.88	1511.45	0.893358	2.50925	0.695836	0.715697	0.58704	0.615061	0.931588	0.980135	1.13279	1.01693	1.01003	4006.61	23.828	2673.72	31.7807
7081888	1	2015-07-17	2015-07-17	0	1	48	2019-02-18	1966-10-21	52	0	65	160.5	25.2327	23.1633	1.15095	27.6111	23.9899	0.907554	0.968981	5.80898	19.2694	8.24313	49638.4	18.2638	7.73644	0.306604	0.78982	7.21905	47048.1	1990.91	2590.27	1.30105	1756.38	1922.66	1.09467	2.84658	0.832447	0.909284	0.649456	0.651795	0.917211	1.13814	1.42481	1.28348	1.29718	3861.43	23.0823	3019.27	29.6928
7108452	1	2015-05-22	2015-05-22	0	1	50	2019-02-18	1964-12-14	54	-1	66.7	164.5	24.6487	26.1319	1.09412	28.3435	25.9052	1.03119	1.14145	6.38273	18.0423	7.93003	48823	17.274	7.54618	0.306149	0.828447	9.54515	46743.9	2068.56	2079.12	1.00511	1831.64	1512.77	0.825908	2.39051	0.676806	0.707786	0.520478	0.529601	0.662715	0.806559	1.00897	0.985086	1.00721	3612.5	23.4775	3037.68	27.3207
7119707	1	2016-10-13	2016-10-13	0	1	50	2019-02-18	1966-04-29	53	0	67.2	173	22.4531	22.5645	1.19151	27.8985	23.4144	1.15256	1.26749	5.06373	17.3774	7.59941	52008.7	16.6494	7.23553	0.32225	0.964462	9.76087	49829.9	2114.35	2178.8	1.03048	1849.96	1565.53	0.846252	2.31955	0.725816	0.737127	0.546639	0.56428	0.6781	0.697248	1.05183	0.976809	1.01956	4173.33	23.6332	2784.83	22.9873
7125210	1	2015-05-06	2015-05-06	0	1	47	2019-02-18	1968-01-05	51	-1	79.5	179	24.812	22.3919	1.0809	28.1129	26.0089	1.02255	0.950698	5.49914	19.0595	9.25284	61068.5	18.128	8.71414	0.351207	1.1253	8.31898	58084	2436.88	2984.51	1.22473	2183.63	2387.31	1.09327	2.35822	0.826594	0.877708	0.59209	0.599469	0.867386	1.06297	1.39619	1.34266	1.30211	4298.73	23.8548	3882.2	24.2292
7126799	1	2015-06-08	2015-06-08	0	1	77	2019-02-18	1937-06-16	82	-1	60	145	28.5375	22.4512	1.52278	32.6636	21.45	1.11617	1.07959	6.53085	22.5583	10.4874	47428.9	21.6698	10.0466	0.35205	0.740186	4.83697	45560.7	1778.28	1868.13	1.05053	1557.69	1361.01	0.873737	2.29889	0.700903	0.702693	0.515002	0.527836	0.901072	0.91252	1.00589	1.02761	1.01392	3616.07	23.7929	3314.85	25.2905
7128684	1	2015-11-03	2015-11-03	0	1	46	2019-02-18	1969-06-11	50	-1	89.4	176.5	28.6978	28.2978	1.14546	34.0691	29.7427	0.999118	1.01466	8.02796	20.3416	9.50232	63368.7	19.4953	9.04607	0.315219	0.981977	9.90744	60732.2	2340.92	2636.55	1.12629	2093.64	2108.17	1.00694	2.13685	0.747489	0.809926	0.555212	0.619543	0.870205	0.946671	1.42522	1.19634	1.16165	4279.62	24.1376	4325.71	28.7547
7137915	1	2015-06-05	2015-06-05	0	1	75	2019-02-18	1939-11-22	79	-1	72	163	27.0993	26.6269	1.10609	30.2223	27.3235	0.945737	1.01656	7.23895	19.9476	8.78466	52998.9	19.1164	8.3298	0.307381	0.816681	8.29874	50790.3	2031.13	2208.56	1.08736	1801.38	1703.81	0.94584	2.19692	0.788642	0.787412	0.534284	0.563745	0.797438	1.18103	1.10861	1.11124	1.17027	3837.4	24.1142	3028.05	29.7358
7141902	1	2015-06-05	2015-06-05	0	1	70	2019-02-18	1944-12-30	74	-1	78.4	171	26.8117	21.175	0.996727	23.0666	23.1424	0.899355	0.920817	5.60155	20.8521	9.5737	60973.5	20.0585	9.12347	0.34028	0.995013	6.39999	58653	2226.64	2320.5	1.04216	1987.73	1840.43	0.925895	2.00945	0.732813	0.775293	0.503508	0.533347	0.846922	1.02142	1.07004	1.05173	1.12326	3831.86	23.9857	3712.64	23.0828
7142093	1	2016-07-08	2016-07-08	0	1	54	2019-02-18	1962-05-18	57	-1	73.2	174	24.1776	25.786	1.33511	35.8744	26.8701	1.10704	1.09472	6.25039	17.9891	8.27266	54463.9	17.1239	7.82269	0.323552	0.979585	10.3359	51844.3	2263.67	2619.57	1.15723	2000.87	2086.59	1.04284	2.0281	0.810146	0.840935	0.642184	0.616289	1.12693	1.25874	1.44809	1.15762	1.15112	4175.54	24.0874	3464.36	28.5714
8001215	1	2015-07-15	2015-07-15	0	1	51	2019-02-18	1964-06-08	55	-1	68.7	175	22.4327	19.9615	0.947431	22.3698	23.611	0.926498	0.829112	4.44119	17.8075	8.61211	54535.6	16.9408	8.15058	0.363335	1.11271	7.09518	51881.3	2267.25	2654.33	1.17073	1994.89	1998.21	1.00166	2.40905	0.772442	0.804355	0.609566	0.572693	0.862525	1.01446	1.22795	1.1802	1.17618	4123.92	23.3548	3433.55	22.1114
8005331	1	2015-06-26	2015-06-26	0	1	52	2019-02-18	1963-06-21	56	-1	62.9	166.5	22.6894	20.9171	1.13615	23.8407	20.9838	1.14843	1.13777	4.71747	17.8357	8.36965	49444.6	17.1694	8.01143	0.353092	0.97885	7.57185	47597.4	1940.34	1847.19	0.951992	1703.03	1409.12	0.827422	1.84592	0.690777	0.702465	0.493222	0.511581	0.728852	0.817488	0.910545	1.01628	1.00756	3488.1	24.0141	2971.03	20.9814
8013788	1	2016-03-09	2016-03-09	0	1	54	2019-02-18	1962-01-10	57	0	75.9	172.5	25.5072	22.186	1.23274	29.2903	23.7603	1.19862	1.23162	5.63641	19.7688	9.18154	58824.5	18.9966	8.76539	0.343643	1.02255	8.04613	56526.7	2193.59	2297.79	1.0475	1962.24	1805.01	0.919872	2.13006	0.732083	0.745284	0.596187	0.577382	0.982914	0.915289	1.18316	1.07704	1.05167	3905.52	24.064	3890.35	22.6219
8025869	1	2015-06-19	2015-06-19	0	1	51	2019-02-18	1963-11-23	55	-1	71	175	23.1837	22.6265	1.18829	26.4906	22.2929	1.09899	1.07919	5.3491	18.2917	8.59419	56018.4	17.5606	8.18576	0.353083	1.08132	8.71193	53779.4	2228.63	2239.02	1.00466	1982.95	1797.11	0.906283	1.79871	0.714761	0.748099	0.520883	0.558967	0.79595	0.779286	1.15512	1.13642	1.06148	3698.37	24.129	3646.38	24.7658
8027615	1	2015-11-02	2015-11-02	0	2	54	2019-02-18	1960-12-06	58	50	50	156	20.5457	31.3687	0.980943	36.0273	36.7272	0.877596	1.00603	6.3619	13.9191	5.67385	33873.6	13.2793	5.36288	0.261022	0.635224	13.6373	32316.5	1701.43	1557.14	0.915193	1478.85	1116.39	0.754903	1.98016	0.588751	0.590058	0.492807	0.465836	0.664692	0.840266	0.954107	0.907256	0.912126	3134.41	23.7661	1784.85	34.2553
8048228	1	2015-06-26	2015-06-26	0	1	66	2019-02-18	1948-07-04	71	-1	69	170	23.8754	26.1671	1.21269	32.7088	26.9722	1.12171	1.31798	6.24309	17.6154	7.11879	50908.6	16.6459	6.6445	0.278298	0.804283	11.6437	48106.7	2225.04	2801.89	1.25925	1960.65	2186.49	1.11519	2.32758	0.854722	0.863613	0.686776	0.676897	1.33687	1.45891	1.45774	1.22654	1.22983	4440.98	23.8901	2992.06	32.1388
8061846	1	2016-09-22	2016-09-22	0	1	53	2019-02-18	1963-05-18	56	-1	71.8	174.5	23.5794	20.4899	1.2272	25.1475	20.4917	1.00362	1.01508	4.94067	19.172	8.70489	58379.1	18.2875	8.21953	0.348589	1.06146	7.40508	55686	2307.47	2693.18	1.16716	2042.68	2128.44	1.04199	2.13275	0.833822	0.870405	0.597558	0.593666	0.811608	0.975409	1.38582	1.22996	1.2612	4162.17	23.8263	3374.41	23.0794
9000442	1	2015-04-03	2015-04-03	0	1	55	2019-02-18	1960-12-08	58	-1	61.7	160	24.1016	23.105	1.16711	29.8041	25.5366	1.03977	1.12415	5.48204	18.2446	8.10815	46706.1	17.4252	7.68716	0.318949	0.816509	7.77836	44608.4	1849.56	2097.68	1.13415	1628.57	1574.53	0.966821	2.36727	0.80941	0.824764	0.6495	0.653394	0.978339	1.08532	1.18738	1.09566	1.06818	3375.82	23.471	2733.16	26.2015
9001011	1	2015-05-14	2015-05-14	0	1	48	2019-02-18	1967-04-20	52	-1	77	172.5	25.8769	22.3414	1.20358	25.2818	21.0055	1.2493	1.14063	5.68374	19.7566	9.2392	58788.3	18.8634	8.75215	0.338222	1.00642	7.96831	56130.5	2149.39	2657.78	1.23653	1902.91	2069.36	1.08747	2.38736	0.796337	0.825782	0.585936	0.586364	0.813918	1.10223	1.40622	1.38613	1.31921	4045.7	23.7156	3792.72	27.3806
9001182	1	2015-04-13	2015-04-13	0	1	44	2019-02-18	1971-05-22	48	-1	76	173	25.3934	24.514	1.41719	32.1356	22.6755	1.16319	1.32268	6.15008	18.938	8.45602	56679.4	18.2309	8.08241	0.318288	0.952603	9.76119	54563.4	2047.06	2116.02	1.03369	1787.04	1579.63	0.883935	2.06292	0.731628	0.74176	0.513788	0.50977	0.742615	0.876997	1.04605	1.10781	1.07752	4297.48	24.4118	3439.78	24.2922
9002260	1	2015-04-30	2015-04-30	0	1		2019-02-18	1964-03-13	55	0	71	163	26.7229	17.1864	1.29041	21.3236	16.5247	1.0848	1.21184	4.63568	22.3373	9.86912	59347.8	21.365	9.38528	0.351208	0.933124	4.8717	56764.7	2102.4	2583.16	1.22867	1866.68	2071	1.10946	2.17271	0.782525	0.876357	0.580135	0.681966	0.876053	0.880289	2.07878	1.25239	1.17256	3694.62	23.7464	3536.07	18.2237
6395	2	2017-06-27	2016-06-15	377	1	61	2019-02-18	1956-02-04	63	-1	70	173	23.3887	26.9003	1.15495	31.8678	27.5925	1.00881	1.11626	6.38589	17.3532	7.61037	51936.4	16.6507	7.23	0.309124	0.925177	11.2294	49833.8	2074.93	2102.66	1.01336	1839.21	1635.17	0.889061	1.98322	0.659717	0.70831	0.463741	0.503733	0.765859	0.937379	1.15032	1.08242	1.0781	3777.42	24.1007	3209.9	29.0436
42585	2	2016-05-06	2015-05-21	351	1	54	2019-02-18	1961-09-05	57	-1	96.2	182	29.0424	29.6349	1.11475	35.3342	31.697	0.9911	1.09285	8.6547	20.5497	9.04676	68068.8	19.7224	8.59517	0.295953	0.980314	11.4561	65328.3	2297.11	2740.45	1.193	2059.8	2140.12	1.03899	2.52969	0.781598	0.801139	0.619207	0.559054	0.908479	1.09405	1.309	1.31952	1.26162	4479.08	24.1983	4387.87	33.0291
49541	2	2016-07-21	2015-04-03	475	1	46	2019-02-18	1970-03-24	49	-1	70.9	169.5	24.6778	23.9088	1.05965	26.9733	25.455	0.935391	1.00022	5.88186	18.7194	8.12263	53781.2	17.927	7.72012	0.312837	0.898787	8.53236	51504.6	2105.99	2276.61	1.08102	1850.35	1703.42	0.920591	2.24223	0.733049	0.796777	0.505818	0.541195	0.832535	1.00912	1.23072	1.08102	1.05225	4310.28	23.8724	3326.77	27.4471
68575	2	2017-08-01	2015-09-14	687	1	45	2019-02-18	1972-06-15	47	-1	90	176	29.0548	29.8134	1.15979	36.9327	31.8442	1.16818	1.3743	8.40135	19.7784	8.6857	61265.6	18.7164	8.13707	0.28006	0.867513	12.2599	57976	2437.67	3289.61	1.34949	2179.65	2583.01	1.18506	2.73854	0.88698	0.933927	0.762416	0.658451	1.00008	1.21093	1.69271	1.40311	1.367	4254.55	23.6168	3318.16	30.7449
74238	2	2016-11-04	2015-11-13	357	2	66	2019-02-18	1950-10-01	68	53	44	150	19.5556	31.6268	1.12631	34.5493	30.6746	1.11624	1.32855	6.18969	13.3813	5.25613	30108	12.9109	5.0388	0.257666	0.579749	14.5305	29049.5	1351.03	1058.53	0.783493	1140	751.12	0.658879	1.45664	0.559924	0.549446	0.4954	0.458438	0.504866	0.625553	0.84218	0.814231	0.818553	2928.32	24.42	1552.05	40.1819
76600	2	2016-03-09	2015-03-23	352	1	42	2019-02-18	1973-05-24	46	-1	60.9	168	21.5774	18.1918	1.07931	21.8452	20.24	0.997601	0.984689	3.91936	17.6253	8.09854	49745.5	16.9122	7.70976	0.357307	1.00846	6.41226	47732.9	1909.68	2012.66	1.05392	1646.09	1513.31	0.919336	1.89438	0.772146	0.836152	0.507777	0.538339	0.672606	0.780139	1.11923	1.12102	1.09803	3873.74	23.8239	3177.19	19.453
129394	2	2017-09-26	2015-09-30	727	1	51	2019-02-18	1965-11-27	53	-1	69	173.5	22.9219	24.7054	0.988899	26.0792	26.372	0.901791	0.961587	5.69828	17.3666	7.83022	52277.4	16.6401	7.44525	0.32481	0.97775	9.68839	50090.4	2051.83	2187.01	1.06588	1802.57	1594.21	0.884411	2.37821	0.685557	0.715156	0.468281	0.501647	0.670588	0.844078	1.00748	1.14608	1.10733	3880.13	23.514	3332.49	24.4535
343041	2	2016-06-28	2015-06-05	389	1	82	2019-02-18	1937-03-12	82	-1	65.8	169.5	22.9027	27.1945	1.23014	30.2577	24.597	1.15558	1.35609	6.2686	16.7823	7.17575	48216.1	16.0478	6.79265	0.296588	0.852104	12.1375	46105.6	2003.26	2110.5	1.05353	1781.47	1695.25	0.951602	1.87227	0.721793	0.748038	0.536433	0.648227	1.00295	1.35275	1.15512	1.07947	1.10862	3373.75	24.0799	2937.16	28.5544
409830	2	2017-08-31	2016-09-01	364	1	55	2019-02-18	1961-11-05	57	-1	75.9	180.5	23.2963	20.9092	1.03009	22.3951	21.7408	0.982533	1.05192	4.87706	18.4479	8.28579	60103.8	17.7631	7.91627	0.339808	1.1071	8.42815	57872.8	2258.89	2231.04	0.987672	1982.55	1761.11	0.888303	1.70058	0.707105	0.748911	0.554209	0.598672	0.732881	0.843483	1.02935	1.04205	1.07349	4014.27	24.0991	3499.1	22.1084
490207	2	2017-03-21	2016-06-21	273	1	41	2019-02-18	1975-08-14	44	-1	71.4	174.5	23.4481	21.7408	1.07538	25.8426	24.031	0.984535	1.035	5.01948	18.0683	8.30295	55018.6	17.2286	7.88825	0.336413	1.02439	8.38771	52461.7	2102.4	2556.9	1.21618	1840.8	1934.2	1.05074	2.38031	0.832964	0.80858	0.681087	0.626107	0.868635	1.12328	1.45476	1.22038	1.20741	3919.37	23.3368	3313.22	20.193
491688	2	2016-04-26	2015-04-14	378	1	43	2019-02-18	1972-09-05	46	-1	86.8	179	27.0903	23.4368	1.04475	26.256	25.1314	0.939332	0.949179	6.37651	20.8307	9.77523	66743.7	20.0099	9.29266	0.343025	1.09909	7.90467	64113.6	2366	2630.07	1.11161	2093.64	2139.32	1.02182	1.80186	0.732221	0.79652	0.566661	0.570724	0.803288	0.894656	1.28856	1.30644	1.27663	4130.31	24.1773	4585.63	22.9581
526343	2	2017-08-03	2016-08-04	364	1	53	2019-02-18	1963-08-05	56	0	68.9	167	24.7051	27.1477	1.04463	29.9902	28.7089	1.09025	1.12327	6.71448	18.0187	7.91545	50252.3	17.2787	7.50777	0.303896	0.847535	10.2267	48188.6	1965.03	2063.73	1.05023	1733.29	1623.05	0.9364	1.9016	0.752604	0.769539	0.616056	0.587884	0.821194	0.936966	1.07332	1.13954	1.11179	3813.23	24.3994	3012.55	31.074
618523	2	2017-03-10	2016-06-02	281	1	50	2019-02-18	1966-04-15	53	0	63	168	22.3214	21.0434	1.26329	24.6975	19.5501	1.21588	1.2054	4.8165	18.0719	8.51707	51006.2	17.205	8.06978	0.361526	1.02037	7.90042	48559.4	2148.99	2446.76	1.13856	1901.72	1899.97	0.999079	2.2113	0.740383	0.816379	0.602863	0.621329	0.880723	1.09251	1.27437	1.20309	1.18108	3541.4	23.4896	3137.7	20.7798
1234684	2	2017-08-23	2015-05-27	819	1	50	2019-02-18	1967-02-23	52	-1	70.8	175	23.1184	27.3426	1.13514	32.831	28.9224	0.99209	1.17876	6.37707	16.9457	7.30185	51896.3	16.1132	6.89644	0.29831	0.913575	12.3322	49346.6	2172.48	2549.68	1.17362	1934.77	2009.8	1.03878	2.27109	0.772062	0.801253	0.651808	0.709043	0.955836	1.20049	1.47799	1.2316	1.12233	3633.98	23.6128	2641.62	27.5545
1247260	2	2016-06-28	2015-06-08	386	1	83	2019-02-18	1932-09-09	87	-1	61.2	157.5	24.6712	27.8638	1.0689	30.4496	28.4868	1.03956	1.16749	6.81704	17.6485	7.22554	43779.4	16.8505	6.84801	0.277571	0.68855	10.1491	41799.9	1820.09	1979.49	1.08758	1565.26	1329.71	0.849518	2.54977	0.68394	0.69559	0.472671	0.504996	0.888737	0.962807	0.995728	0.997337	1.05421	4328.99	23.839	2680.43	31.8283
1283096	2	2016-06-30	2015-06-04	392	1	78	2019-02-18	1937-10-28	81	-1	59.2	167	21.227	29.5462	1.13051	33.2482	29.4099	0.947548	1.08023	6.2228	14.8385	6.10191	41383.1	14.2385	5.7882	0.272681	0.760479	13.8787	39709.6	1712.18	1673.44	0.977368	1486.02	1241.05	0.835152	1.91179	0.599245	0.748872	0.474917	0.504868	0.783017	0.829415	1.10553	0.922848	1.0504	3637.11	24.8855	2135.43	37.6878
1289441	2	2016-09-24	2015-03-07	567	1	14	2019-02-18	2002-01-03	17	-1	54	156.4	22.076	14.4084	1.108	16.0703	14.5039	1.00458	0.861328	3.04958	18.1157	9.11255	44312.7	17.4371	8.76526	0.397049	0.971221	3.81634	42652.9	1684.31	1659.87	0.985487	1432.26	1275.05	0.890235	1.52675	0.689654	0.720188	0.536976	0.536836	0.679023	0.798853	1.0517	1.08313	1.09007	3336.18	24.1546	2707.02	12.5903
1338749	2	2016-04-21	2015-06-11	315	1	58	2019-02-18	1957-09-15	61	-1	76.3	179.5	23.6808	27.032	1.16033	31.8176	27.4211	1.21158	1.19964	6.45296	17.4186	7.98448	56123.3	16.6568	7.57549	0.3199	1.03073	12.2618	53668.5	2203.94	2454.75	1.1138	1954.28	1904.72	0.97464	2.20312	0.743124	0.772915	0.548624	0.579858	0.87492	0.954502	1.23563	1.18678	1.1857	4190.45	24.0485	3378.1	31.0343
1381472	2	2017-05-03	2015-04-21	743	1	53	2019-02-18	1963-10-14	55	-1	70	173	23.3887	25.3593	1.08829	28.0487	25.7731	1.04318	1.1531	5.94999	17.5128	7.54507	52414	16.7974	7.21521	0.308492	0.923284	10.64	50273.1	2156.16	2140.87	0.99291	1892.96	1535.98	0.811418	2.29822	0.683798	0.684531	0.570626	0.601017	0.801536	0.965787	1.00198	0.921554	0.906959	4257.08	23.8349	2902.72	28.0132
1429022	2	2016-06-29	2015-06-04	391	1	81	2019-02-18	1935-03-05	84	-1	61.4	172.5	20.6343	22.7839	1.26852	26.4144	20.823	1.20085	1.30389	4.72071	15.9988	7.02118	47606.4	15.2813	6.63557	0.321579	0.956899	10.7998	45471.4	2014.01	2135.01	1.06008	1766.74	1643.84	0.930441	1.98635	0.726054	0.757752	0.599985	0.583053	0.888188	0.922635	1.02517	1.12539	1.13618	3788.04	24.0027	2650.93	24.0285
1633143	2	2016-08-10	2015-07-03	404	1	54	2019-02-18	1961-12-18	57	-1	73.4	173	24.5247	22.5854	1.16809	29.8762	25.5771	0.969299	1.02245	5.56298	19.0679	8.49635	57068.2	18.2398	8.02312	0.327145	0.979111	8.20192	54589.8	2335.74	2478.42	1.06109	2079.31	1966.61	0.945799	1.99593	0.783935	0.810981	0.572404	0.600527	0.874758	0.898334	1.14629	1.11974	1.07937	4152.38	24.2002	3836.88	24.7581
1792717	2	2015-03-23	2014-09-16	188	2		2019-02-18	1966-12-13	52	-1	56	161	21.6041	32.984	0.778881	30.2024	38.7766	0.751601	0.753029	7.42935	15.0948	6.12975	39127.2	14.3188	5.78097	0.267587	0.693612	12.7598	37115.7	1865.88	2011.47	1.07803	1621.4	1383.48	0.853262	2.56866	0.61428	0.655262	0.539083	0.588751	0.894515	1.02313	1.12804	1.00613	0.982679	3628.13	23.2472	1806.56	45.461
1801714	2	2016-07-06	2015-06-24	378	1	47	2019-02-18	1969-01-11	50	-1	66.9	171.5	22.7456	21.9965	1.12401	26.1472	23.2625	0.949566	0.843991	5.05629	17.9305	8.3365	52737.8	17.179	7.96134	0.350016	1.02948	7.55966	50527.3	2093.64	2210.5	1.05581	1830.84	1687.93	0.921939	1.98847	0.678424	0.731022	0.572787	0.603033	0.94752	1.18078	1.17424	1.05067	1.04977	4013.97	23.9858	3043.7	28.7522
1917951	2	2016-09-28	2015-11-03	330	1	42	2019-02-18	1974-03-15	45	-1	65.8	171.5	22.3716	24.4347	1.09813	29.8161	27.1517	1.0189	1.11988	5.46214	16.8918	7.3052	49682.7	16.1095	6.90172	0.308503	0.907377	10.378	47381.8	2097.63	2300.97	1.09694	1854.34	1736.56	0.936487	2.31989	0.721076	0.7858	0.530418	0.606376	0.773339	0.890063	1.14309	1.14666	1.14698	3708.27	23.5567	2974.97	28.7866
1926510	2	2016-08-25	2015-10-15	315	1	46	2019-02-18	1970-01-20	49	-1	67.1	175.5	21.7855	25.6767	1.07515	29.3017	27.2534	0.974195	1.15825	5.57037	16.1239	6.78025	49661.9	15.42	6.42206	0.294786	0.907947	12.3302	47494	2041.88	2167.86	1.0617	1778.28	1555.29	0.8746	2.32392	0.72287	0.771298	0.587716	0.59295	0.68916	0.838032	1.01005	1.06404	1.06154	4188.97	23.6887	2575	26.6272
1975332	2	2016-09-14	2015-10-20	330	1	45	2019-02-18	1971-05-10	48	-1	73.5	170.5	25.2836	16.5509	1.04451	17.5807	16.8315	0.987643	1.04674	4.20647	21.209	9.39637	61655	20.1829	8.82829	0.349171	1.01505	5.13496	58672.1	2341.71	2982.88	1.2738	2103.6	2489.25	1.18333	2.07306	0.911186	0.971767	0.641864	0.620433	1.04809	1.20877	1.44064	1.46487	1.41644	3674.61	23.8425	3721.87	20.1574
1978164	2	2017-09-01	2016-09-21	345	1	54	2019-02-18	1962-09-29	56	0	70.9	158.5	28.222	27.1876	1.6472	37.3345	22.6655	1.50471	1.94986	7.74447	20.7408	8.39519	52105.6	19.9844	8.00653	0.283698	0.712714	9.65505	50205.3	1833.23	1900.3	1.03658	1597.51	1422.45	0.890417	2.02716	0.741218	0.792959	0.532816	0.570257	0.853814	0.778256	1.08839	1.09624	1.09664	4056.76	24.6657	3007.91	28.1433
2010647	2	2017-06-09	2015-06-04	736	1	82	2019-02-18	1934-12-03	84	-1	75	164.5	27.7159	32.4876	1.36931	39.8741	29.1199	1.19172	1.5371	8.96632	18.6329	7.28443	50421.2	17.9025	6.89725	0.248855	0.673408	13.4864	48444.7	1934.77	1976.44	1.02154	1713.38	1456.41	0.850024	2.34893	0.702331	0.734046	0.528251	0.547442	0.681874	0.877597	0.965331	1.05756	1.07921	4302.64	24.9755	2776.18	38.906
2068274	2	2016-07-18	2015-07-07	377	1	58	2019-02-18	1958-05-15	61	-1	71.3	169	24.9641	24.6562	1.12438	27.551	24.5032	1.06307	1.18594	6.08024	18.5799	8.14056	53066	17.8539	7.75307	0.310568	0.887015	9.28259	50992.7	2080.5	2073.31	0.996543	1844.38	1576.5	0.854759	2.10404	0.674248	0.7076	0.488678	0.481987	0.689447	0.886354	1.14929	1.04148	1.01536	3754.58	23.9739	3406.21	24.8815
2146090	2	2016-07-19	2015-07-22	363	1	46	2019-02-18	1970-05-24	49	-1	70.6	169	24.719	27.0714	1.09165	31.0618	28.454	1.07498	1.09787	6.68857	18.0186	8.02419	51462.8	17.2292	7.59739	0.30735	0.877822	10.303	49208.3	2107.98	2254.51	1.06951	1870.26	1801.76	0.963371	1.9046	0.731531	0.80982	0.546067	0.59124	0.894306	0.991269	1.24185	1.14437	1.13259	3690.08	24.1139	2969.64	32.5869
2168166	2	2017-09-12	2016-09-05	372	1	46	2019-02-18	1970-11-03	48	-1	74.4	173	24.8588	25.9244	1.17068	30.8452	26.348	1.14956	1.24501	6.46347	18.4685	8.22061	55274.4	17.6457	7.77445	0.312744	0.936011	10.5269	52811.9	2179.65	2462.57	1.1298	1929.99	1922.56	0.996151	2.16297	0.800095	0.85153	0.550499	0.599187	0.792631	0.96352	1.20836	1.25185	1.21653	4026.06	23.8572	3528.53	28.4686
2187898	2	2016-08-08	2015-09-09	334	1	50	2019-02-18	1966-07-08	53	-1	72.8	170	25.1903	24.9004	1.35191	33.2477	24.5932	1.19041	1.39306	6.23822	18.8145	8.19376	54373.9	18.1326	7.84653	0.31149	0.900206	9.84677	52403.2	2017.19	1970.64	0.976924	1769.12	1484.59	0.839164	1.95937	0.721553	0.740959	0.473658	0.52128	0.713882	0.829346	1.05878	1.013	0.983409	3913.82	24.0829	3171.04	24.5472
2238353	2	2016-07-07	2015-07-20	353	1	56	2019-02-18	1959-11-16	59	-1	59.3	172	20.0446	19.6136	0.979681	21.5254	21.9718	1.02783	1.0424	3.89142	15.949	7.39792	47183.6	15.2572	7.04017	0.351225	1.03906	8.2957	45136.9	1942.73	2046.66	1.0535	1669.98	1494.24	0.894768	2.02534	0.758427	0.800317	0.559651	0.542698	0.751425	0.805433	1.04352	1.07509	1.04252	3986.77	23.7506	3177.34	17.7768
2263535	2	2016-07-22	2015-11-12	253	1	47	2019-02-18	1968-09-20	50	-1	69.6	176	22.469	18.134	0.904579	18.7084	20.6818	0.889424	0.884837	3.87776	17.5062	7.98413	54227.2	16.6524	7.54511	0.335801	1.04018	6.79473	51582.4	2292.73	2644.79	1.15355	2019.98	2068.85	1.02419	2.11157	0.783532	0.861708	0.560338	0.564319	0.847503	1.10991	1.38528	1.18909	1.19325	4013.9	23.6948	3530.66	19.3309
2292589	2	2016-03-22	2015-04-03	354	1	50	2019-02-18	1964-05-12	55	-1	81.5	175.5	26.4608	22.1727	1.3267	29.3803	22.1455	1.35009	1.44281	5.81395	20.4073	9.21532	62854.9	19.4785	8.72254	0.32964	1.0153	8.62745	59994.4	2368.39	2860.52	1.20779	2120.32	2341.21	1.10418	2.09342	0.866569	0.926942	0.677366	0.722104	1.00353	1.16128	1.53216	1.27607	1.23627	4166.94	24.0281	3889.82	22.9369
2459803	2	2017-10-19	2016-10-17	367	1	48	2019-02-18	1968-11-26	50	-1	74.6	168	26.4314	20.8555	1.20893	26.4353	21.8666	1.127	1.1661	5.48613	20.8193	9.43515	58760.5	19.8757	8.9565	0.338858	0.956393	6.74085	56097.3	2190.8	2663.22	1.21564	1948.71	2118.8	1.08728	2.24879	0.820234	0.874552	0.715155	0.652227	1.00518	1.32937	1.5584	1.13216	1.2258	3985.26	23.9784	3570.07	22.9906
2466747	2	2017-07-03	2016-05-20	409	1	42	2019-02-18	1974-07-05	45	-1	79.6	178.5	24.9825	24.1183	1.11328	29.0733	26.1149	1.0119	0.99707	6.08699	19.1511	8.86256	61019.7	18.3081	8.39553	0.336056	1.07075	9.07463	58333.7	2305.87	2686.09	1.16489	2045.86	2148.38	1.05011	2.06801	0.781951	0.871295	0.590274	0.557176	0.847929	1.04031	1.41837	1.23549	1.26035	3912.55	23.8216	3576.66	26.3018
2483452	2	2016-11-04	2015-11-13	357	2	59	2019-02-18	1959-06-14	60	52	81.5	162	31.0547	34.8752	1.12564	35.0429	31.1314	1.2023	1.68601	11.1561	20.8324	7.57617	54672.6	19.9208	7.14198	0.229981	0.603561	13.2837	52280.1	2000.87	2392.53	1.19575	1779.88	1899.1	1.06698	2.2328	0.701988	0.721637	0.63739	0.703892	1.0622	1.32647	1.61034	1.24269	1.26161	3577.24	23.9272	2499.85	45.05
2583707	2	2016-09-01	2015-10-30	307	1	41	2019-02-18	1974-11-03	44	-1	51.9	169	18.1716	18.6914	1.02963	22.5883	21.9383	0.941117	0.886317	3.3761	14.6862	7.0254	41945.2	13.8981	6.60689	0.363582	1.03843	7.77185	39694.3	2012.81	2250.85	1.11826	1773.5	1683.51	0.949256	2.37075	0.743946	0.788766	0.540198	0.58808	0.81682	0.933858	1.06795	1.12972	1.18807	3470.26	23.3052	2892.76	17.1649
2723510	2	2018-07-20	2017-07-18	367	1	54	2019-02-18	1964-03-24	55	0	77.2	173	25.7944	25.5436	1.22886	29.4894	23.9974	1.25877	1.48565	6.54476	19.0772	8.24378	57096	18.2979	7.80675	0.302653	0.90581	10.6223	54763.9	2088.33	2332.14	1.11675	1876.97	1889.9	1.00689	2.0923	0.809057	0.799184	0.545001	0.557872	0.829253	0.968157	1.15442	1.32489	1.30658	3757.72	24.2994	3175.71	26.3523
2763358	2	2017-09-25	2015-10-14	712	1	53	2019-02-18	1964-02-25	55	-1	80.8	178	25.5018	20.3313	1.21426	26.3734	21.7197	1.2271	1.26975	5.22182	20.4618	9.29477	64831.3	19.5389	8.79749	0.344975	1.09302	7.75406	61907.1	2396.26	2924.15	1.22029	2139.43	2243.97	1.04886	2.64836	0.847419	0.872099	0.634761	0.644603	0.919928	0.998071	1.31254	1.23327	1.24806	4447.45	23.5854	4109.58	22.411
2903701	2	2016-09-22	2015-10-13	345	1	56	2019-02-18	1959-12-07	59	-1	71.9	168.5	25.3238	28.0866	1.11334	32.2553	28.9717	1.04419	1.31544	7.1274	18.2492	7.59417	51813.5	17.6402	7.28622	0.287722	0.816907	11.2742	50084.4	1861.11	1729.1	0.929072	1641.31	1323.67	0.806471	1.84458	0.68737	0.6821	0.477369	0.55004	0.734974	0.813717	1.0081	0.961775	0.969099	3659.24	24.3818	2846.28	28.683
2906892	2	2016-04-06	2015-10-14	175	1	59	2019-02-18	1956-11-23	62	-1	61.6	165	22.6263	21.8659	1.10871	23.9063	21.5622	1.01601	1.06507	5.39992	19.2957	8.4844	52532.5	18.6227	8.11352	0.358589	0.976258	7.14761	50700.4	1882.21	1832.16	0.973411	1664	1442.25	0.866733	1.78693	0.765428	0.771246	0.527286	0.504778	0.787577	0.828906	0.969272	1.02601	1.03122	3721.62	24.4996	3828.26	24.5855
2938393	2	2016-05-04	2015-05-21	349	1	53	2019-02-18	1962-10-20	56	-1	67.4	165	24.7567	22.7984	1.45491	29.0741	19.9834	1.12187	1.23783	5.64528	19.1164	8.35213	52044.4	18.3714	7.97875	0.322287	0.877427	8.0179	50016	1915.26	2028.37	1.05906	1681.52	1521.49	0.904826	2.16863	0.66556	0.739118	0.526603	0.550679	0.801327	0.918504	1.15933	1.11497	1.07041	3763.11	23.9596	3160.67	26.2068
2989731	2	2016-07-19	2015-07-20	365	1	54	2019-02-18	1962-04-07	57	-1	67.7	166	24.5682	26.9522	1.44335	35.624	24.6815	1.324	1.61733	6.6451	18.01	7.46157	49628.4	17.2144	7.05264	0.287064	0.791034	11.5222	47435.9	1914.06	2192.52	1.14548	1696.26	1689.96	0.996287	2.30737	0.792008	0.81213	0.620029	0.652762	0.938177	1.02682	1.25387	1.21318	1.15604	3792.7	24.1075	2773.61	29.9638
3036598	2	2016-11-10	2015-11-02	374	2	45	2019-02-18	1971-04-17	48	-1	52.5	158	21.0303	34.7349	0.78867	30.7204	38.9521	0.815876	0.92026	7.52899	14.1466	5.47752	35315.5	13.2504	5.0996	0.242489	0.605348	15.6919	33078.4	1807.35	2237.16	1.23781	1581.18	1508.47	0.954014	3.2219	0.691959	0.768687	0.650629	0.670512	0.903356	1.09321	1.26381	1.12748	1.11979	3625.99	22.6225	1570.88	45.7285
3077673	2	2016-03-22	2015-06-02	294	1	48	2019-02-18	1967-12-17	51	-1	58.9	173.5	19.5666	21.3402	0.883749	20.6593	23.3769	0.93808	1.03577	4.14394	15.2745	6.5232	45979.6	14.6088	6.2057	0.317157	0.954714	9.90747	43722.6	2064.97	2257	1.09299	1808.94	1555.93	0.860134	2.73819	0.70613	0.735266	0.51772	0.57078	0.723244	0.997146	0.913619	1.05328	1.05865	3982.38	23.0599	2515.36	23.1923
3130723	2	2016-06-28	2015-06-09	385	1	80	2019-02-18	1936-03-14	83	-1	63.5	163.5	23.7541	23.4758	1.07171	26.2546	24.498	0.95375	1.09724	5.55401	18.1044	7.12091	48397.2	17.3239	6.7464	0.28401	0.759223	8.68169	46310.8	1904.51	2086.39	1.0955	1662.41	1476.17	0.887969	2.52059	0.71144	0.714481	0.545338	0.579925	0.871936	1.02752	1.07174	1.06998	1.03047	3915.4	23.4734	2677.74	31.0439
3179655	2	2016-05-23	2015-05-25	364	1	44	2019-02-18	1971-07-02	48	-1	68.3	170	23.6332	20.0392	1.11256	25.5607	22.9747	1.06824	1.02781	4.76788	19.0249	8.93229	54982.1	17.9968	8.38248	0.354691	1.02506	6.98743	52010.6	2244.16	2971.41	1.32406	1965.43	2252.75	1.14619	2.57835	0.943771	0.961849	0.60436	0.608908	0.875968	1.05564	1.43332	1.41669	1.41599	4252.94	23.1965	3649.91	20.8795
3268371	2	2016-05-10	2015-06-01	344	1	36	2019-02-18	1979-07-10	40	-1	67.8	165	24.9036	24.7234	1.35568	30.6914	22.6391	1.1398	1.15588	6.15216	18.7318	8.60266	50997.4	17.8622	8.14165	0.326927	0.890059	8.68748	48629.8	2069.75	2367.58	1.1439	1832.04	1841.44	1.00513	2.21333	0.824086	0.844524	0.556105	0.54306	0.804721	1.07006	1.33415	1.25698	1.22477	3821	23.8678	3440.26	25.342
3327966	2	2016-08-03	2015-07-09	391	1	39	2019-02-18	1976-09-27	42	-1	70.5	161	27.198	24.9275	1.14961	29.5591	25.7124	1.24158	1.25892	6.77436	20.4019	9.36299	52883.8	19.5984	8.94336	0.328824	0.852344	7.76111	50800.9	1938.75	2082.85	1.07433	1718.95	1625.22	0.945468	2.08209	0.726426	0.76561	0.52518	0.565754	0.857729	0.961494	1.32456	1.11897	1.13951	3639.56	24.3544	3199.88	29.4274
3404927	2	2016-08-22	2015-07-30	389	1	52	2019-02-18	1963-10-30	55	0	62.5	158.5	24.8783	24.0659	1.26188	29.0795	23.0445	1.33587	1.45041	6.00802	18.9568	8.30228	47623.9	18.197	7.91889	0.318304	0.799652	8.361	45714.9	1864.69	1908.95	1.02374	1624.98	1418.57	0.872975	2.04575	0.730558	0.711049	0.535026	0.525617	0.799465	0.89652	1.11273	1.02827	1.04828	3802	24.1279	2867.54	25.7531
3406540	2	2017-09-26	2016-08-24	398	1	49	2019-02-18	1968-02-08	51	-1	64.1	169	22.4432	18.1998	0.94747	21.6951	22.898	0.879411	0.836801	4.08792	18.3734	8.8119	52476.2	17.4661	8.33447	0.371359	1.06064	5.7913	49884.9	2170.09	2591.33	1.19411	1928.8	2023.48	1.04909	2.3533	0.877572	0.881953	0.68607	0.690078	0.946386	1.1778	1.23768	1.2171	1.19837	3646.57	23.3835	3577.99	18.23
3577650	2	2015-06-13	2014-09-19	267	1	6	2019-02-18	2008-09-08	10	-1	17	117	12.4187	16.8432	0.969908	17.7063	18.2557	0.939842	0.760434	2.08589	10.2983	4.41079	14097.4	9.7814	4.2211	0.339898	0.465286	4.4663	13389.8	1056.78	707.606	0.669589	851.314	417.591	0.490525	1.41152	0.384602	0.361949	0.404073	0.415048	0.514044	0.602824	0.549214	0.542248	0.549654	2270.73	23.9469	672.706	21.8831
3594039	2	2017-09-07	2016-09-09	363	1	43	2019-02-18	1974-05-30	45	-1	78.4	180	24.1975	22.0027	1.06131	24.5228	23.1062	1.01793	1.08407	5.37659	19.0594	8.50751	61752.5	17.9831	7.97668	0.329649	1.06806	8.91449	58265.2	2472.32	3487.32	1.41055	2207.92	2728.12	1.23561	2.87146	0.944423	0.998692	0.777202	0.743013	1.15743	1.21342	1.73143	1.34686	1.41105	4400.75	23.0532	3516.89	23.8631
3653157	2	2017-06-05	2016-06-27	343	1	70	2019-02-18	1947-11-20	71	-1	73.2	174.5	24.0392	24.0047	0.945318	25.6115	27.093	0.977355	1.09344	5.84706	18.511	8.04075	56366.4	17.6633	7.60136	0.316207	0.962857	9.5045	53785.2	2332.95	2581.13	1.10638	2073.73	2003.69	0.966222	2.22764	0.742058	0.770175	0.66322	0.627842	0.826803	0.994194	1.2275	1.13226	1.1314	4170.67	23.7751	3030.56	24.9021
3728389	2	2016-07-12	2015-09-28	288	1	43	2019-02-18	1973-04-15	46	-1	71.1	178	22.4403	22.8933	1.24294	27.6996	22.2856	1.13415	1.22947	5.19317	17.4911	7.7684	55418.9	16.7161	7.33203	0.326734	1.03522	10.2836	52963.4	2149.39	2455.49	1.14241	1893.36	1937.17	1.02314	2.02444	0.805533	0.851024	0.531266	0.567961	0.861945	0.992821	1.22481	1.2711	1.23807	3923.71	23.8808	3206.21	25.0273
3744056	2	2017-08-09	2016-07-28	377	1	56	2019-02-18	1960-09-03	58	-1	69.9	171	23.9048	20.5842	0.952361	23.159	24.3175	1.04913	1.09889	4.8704	18.7904	8.52851	54945.2	17.9479	8.08899	0.338384	0.989467	7.51688	52481.5	2219.07	2463.62	1.1102	1949.1	1901.56	0.975606	2.08196	0.787604	0.820816	0.6092	0.62649	0.826759	0.947327	1.20819	1.15676	1.14669	4327.95	23.9783	3374.76	20.5342
3747874	2	2016-04-26	2015-05-12	350	1	39	2019-02-18	1976-06-19	43	-1	65.9	157.5	26.5659	27.1145	1.35854	35.9506	26.4627	1.2376	1.3875	7.34848	19.7532	8.55686	49000.3	19.0304	8.18147	0.307969	0.763956	8.84868	47207.3	1789.43	1792.94	1.00196	1548.53	1354.86	0.874934	1.81848	0.717788	0.769634	0.497434	0.567196	0.753069	0.84481	1.06042	1.07117	1.07322	3820.75	24.544	3187.93	29.82
3792793	2	2016-10-15	2015-02-14	609	1	8	2019-02-18	2008-10-04	10	-1	21	122	14.1091	15.881	0.736525	13.6462	18.5279	0.783662	0.726406	2.39481	12.6849	5.32794	18880.2	12.1499	5.11538	0.362558	0.539632	3.52348	18083.9	1134.82	796.305	0.701702	895.911	492.961	0.550235	1.2697	0.39933	0.409476	0.42409	0.393599	0.479416	0.593342	0.642443	0.644357	0.647805	2713.05	24.2207	876.18	20.021
3871024	2	2016-08-13	2015-07-24	386	1	7	2019-02-18	2009-02-19	10	-1	19	116.8	13.9273	16.0531	0.927849	13.753	14.8225	0.922469	0.963058	2.24082	11.718	4.59579	15986	11.2469	4.43829	0.318675	0.434744	4.09273	15343.3	980.325	642.642	0.655539	756.945	350.57	0.463139	1.30751	0.352029	0.370035	0.359217	0.354963	0.440142	0.524296	0.541639	0.527763	0.534615	2555.42	24.1792	715.454	19.4369
4077029	2	2017-03-14	2016-07-26	231	1	58	2019-02-18	1958-09-05	60	-1	70.5	167	25.2788	20.3487	1.17679	25.1446	21.3671	1.17433	1.17453	5.1361	20.1043	9.01674	56068.9	19.2292	8.57444	0.339195	0.945981	6.76041	53628.3	2119.53	2440.55	1.15146	1857.12	1874.39	1.0093	2.15759	0.780478	0.792294	0.596863	0.613758	0.984677	1.26703	1.29512	1.14071	1.15073	4021.69	23.8054	3837.46	21.2279
4150182	2	2016-07-05	2015-07-22	349	1	52	2019-02-18	1964-01-10	55	0	76.9	167	27.5736	25.5937	1.29294	32.1843	24.8923	1.19254	1.26992	7.12821	20.7232	9.08203	57795	19.8967	8.64466	0.313512	0.874354	8.67823	55490	2082.89	2304.94	1.10661	1837.21	1724.16	0.938464	2.36399	0.761294	0.781883	0.562018	0.56143	0.830147	0.920546	1.176	1.16711	1.10182	4411.57	24.4408	3666.34	28.4579
4205850	2	2016-08-24	2015-06-04	447	1	71	2019-02-18	1944-10-18	74	-1	66.1	175	21.5837	23.8043	1.12839	29.9072	26.5044	1.26398	1.4778	5.08124	16.2647	7.15884	49810.6	15.6278	6.80988	0.315511	0.966252	11.7779	47860.2	2017.99	1950.36	0.966485	1777.09	1519.66	0.85514	1.78786	0.70371	0.75986	0.538162	0.555254	0.680313	0.780127	1.09183	1.05305	0.980222	3712.44	24.1085	2487.59	23.1141
4207738	2	2017-09-28	2016-08-18	406	1	54	2019-02-18	1963-05-19	56	0	63.2	160	24.6875	28.4221	1.09163	33.8516	31.0103	0.905577	0.908392	7.04276	17.7364	7.8712	45405.1	17.0095	7.49472	0.303584	0.777174	9.25509	43544.3	1843.59	1860.78	1.00933	1612.64	1359.83	0.843231	2.16916	0.687639	0.708549	0.497773	0.508105	0.744001	0.870976	0.983177	0.981903	1.02562	3623.72	23.9313	2723.62	32.8921
4236901	2	2016-07-05	2015-06-18	383	1	45	2019-02-18	1970-09-16	48	-1	73	171	24.9649	20.9927	1.25567	24.9243	19.8494	1.21687	1.26448	5.20318	19.5825	8.73567	57261.1	18.7255	8.27316	0.331391	0.969021	7.76845	54755.3	2152.97	2505.73	1.16384	1898.53	1995.54	1.0511	2.00514	0.774573	0.881023	0.682445	0.62628	0.848612	0.96247	1.41751	1.24755	1.21795	4174.56	24.0157	3393.75	22.4886
4255052	2	2016-10-12	2015-10-30	348	1	53	2019-02-18	1963-08-23	56	-1	77.1	167	27.6453	22.5988	1.21492	27.0497	22.2646	1.26431	1.3915	6.30541	21.5961	9.58932	60229.4	20.5025	9.03186	0.326705	0.911147	7.56057	57179.5	2299.11	3049.94	1.32657	2051.44	2442.36	1.19056	2.45316	0.908019	0.913494	0.724808	0.774905	1.08262	1.24156	1.7372	1.33988	1.39194	4419.6	23.899	3999.8	22.2423
4259814	2	2016-07-07	2015-06-02	401	1	57	2019-02-18	1958-12-11	60	-1	63.4	167	22.733	22.7062	1.03338	26.3242	25.4739	1.15726	1.19074	5.14584	17.5169	7.71155	48852.9	16.7856	7.31795	0.321909	0.897772	8.88173	46813.4	2039.09	2039.43	1.00017	1787.84	1558.19	0.871551	1.91536	0.68226	0.744018	0.518733	0.528113	0.704793	0.843638	1.09049	1.07893	1.04968	3869.68	24.0657	3074.26	26.806
4278298	2	2016-06-22	2015-07-10	348	1	47	2019-02-18	1968-12-08	50	-1	79	167	28.3266	23.9723	1.39731	29.3906	21.0338	1.20709	1.27324	6.67913	21.1828	9.56527	59076.7	20.3355	9.11753	0.321872	0.897668	7.79176	56713.8	2122.31	2362.97	1.11339	1884.2	1888.74	1.00241	1.9916	0.757331	0.792559	0.591588	0.653333	0.862571	0.980652	1.29758	1.20527	1.25223	3948.53	24.265	3790.42	26.4164
4306576	2	2016-06-28	2015-06-08	386	1	70	2019-02-18	1945-08-27	74	-1	71.2	169	24.9291	24.11	1.23105	30.7281	24.9609	0.923125	1.05713	6.03079	18.9829	7.91712	54217	18.1208	7.49676	0.300723	0.858896	8.79881	51754.9	2064.97	2462.18	1.19236	1800.58	1761.66	0.978381	2.64957	0.701523	0.750636	0.607855	0.612789	0.992074	1.03149	1.15434	1.18946	1.20761	4520.88	23.6044	3339.46	27.555
4335091	2	2017-06-26	2016-07-25	336	1	53	2019-02-18	1964-02-28	55	0	57	167	20.4382	17.7745	1.03707	19.2474	18.5594	1.00417	1.16056	3.6284	16.7851	7.06579	46811.9	16.0953	6.69827	0.327733	0.914016	7.09113	44888.2	1917.25	1923.65	1.00334	1675.95	1473.38	0.879129	1.86602	0.776291	0.778526	0.558649	0.601935	0.752089	0.841013	0.973185	1.04474	1.03682	3458.01	23.8365	2466.28	20.5011
4425576	2	2016-06-21	2015-05-21	397	1	54	2019-02-18	1961-07-18	58	-1	90	177	28.7274	25.6871	1.39362	32.3355	23.2025	1.38994	1.83298	7.33708	21.2263	8.85316	66499.7	20.3879	8.39203	0.292126	0.915203	10.7536	63873.2	2326.18	2626.5	1.1291	2079.31	2129.8	1.02428	2.01194	0.769781	0.797048	0.653241	0.650021	0.86374	1.13765	1.23265	1.22927	1.26603	4135.15	24.3614	3729.45	23.9163
4435113	2	2016-06-16	2015-06-16	366	1	56	2019-02-18	1956-05-14	63	-1	68.6	168	24.3056	23.1422	1.33123	31.1576	23.405	1.26761	1.46248	5.61777	18.6572	7.97031	52658.2	17.8079	7.57139	0.311509	0.879202	9.31005	50261	2022.77	2397.15	1.18509	1757.18	1769.19	1.00684	2.36442	0.768412	0.826934	0.676444	0.678913	0.946726	1.0861	1.44583	1.11755	1.14033	4209.2	23.7109	3072.87	24.7911
4547463	2	2016-06-17	2015-10-30	231	1	56	2019-02-18	1960-01-15	59	-1	76.5	170	26.4706	21.5273	1.24834	27.0397	21.6606	1.16464	1.21232	5.70635	20.8011	9.61113	60115.2	19.819	9.0645	0.342437	0.989642	7.24004	57276.8	2234.2	2838.37	1.27042	2002.46	2340.9	1.16901	2.14665	0.922483	0.910704	0.685397	0.71515	1.12004	1.14719	1.58385	1.35404	1.31984	3800.17	23.8509	3996.05	22.3378
4556134	2	2016-05-04	2015-08-05	273	1	53	2019-02-18	1962-11-05	56	-1	69	170.5	23.7356	21.9501	1.3311	26.062	19.5793	1.10373	1.22067	5.2464	18.6551	7.94587	54230.9	17.8769	7.53898	0.317623	0.923339	8.52349	51968.5	2085.28	2262.48	1.08498	1836.82	1741.02	0.947848	2.0987	0.761268	0.749499	0.554184	0.529151	0.806896	0.934068	1.1493	1.22716	1.15348	4068.2	23.9313	3457.69	25.0715
4732313	2	2016-11-10	2015-11-02	374	2	43	2019-02-18	1972-12-06	46	-1	58.5	161	22.5686	33.9025	0.895389	32.9474	36.7967	0.905309	0.969396	7.67362	14.9607	6.3575	38779.7	14.2542	6.00725	0.266178	0.689959	14.2246	36948.2	1848.76	1831.56	0.990694	1601.89	1376.5	0.859301	1.84327	0.719341	0.761404	0.572664	0.503308	0.788499	0.974431	1.08097	0.988198	0.998098	3489.7	23.9239	1708.24	37.9696
4734682	2	2017-03-14	2015-05-06	678	1	42	2019-02-18	1975-02-21	44	-1	81	173.5	26.9083	25.4536	1.24681	29.0775	23.3215	1.2277	1.461	6.97376	20.4241	8.67739	61481.3	19.5548	8.25203	0.306672	0.923153	9.96246	58864.5	2183.23	2616.79	1.19858	1944.33	1998.4	1.02781	2.58838	0.837598	0.814706	0.618459	0.661537	1.00723	1.2084	1.26985	1.25119	1.26971	4364.32	23.9703	3683.27	25.5398
4803746	2	2016-06-17	2015-06-29	354	1	50	2019-02-18	1965-09-28	53	-1	74.3	170	25.7093	24.7671	1.34886	33.1968	24.6109	1.17736	1.37836	6.35325	19.2987	8.21768	55773.3	18.5444	7.82039	0.304185	0.879094	9.67127	53593.2	2095.63	2180.15	1.04033	1845.97	1689.99	0.915502	1.96329	0.726837	0.794984	0.509084	0.563419	0.7824	0.936311	1.19504	1.11291	1.08695	4219.8	24.2982	3318.21	27.7291
4849501	2	2017-05-17	2016-05-11	371	1	50	2019-02-18	1967-01-19	52	0	65.3	163.5	24.4274	21.8107	1.2234	27.592	22.5535	1.10005	1.14224	5.34181	19.1499	8.6064	51192.1	18.2671	8.15919	0.334018	0.892905	7.33069	48832.2	1986.53	2359.92	1.18796	1731.3	1737.49	1.00357	2.43868	0.744344	0.805181	0.598831	0.624947	0.888556	1.02584	1.40022	1.20402	1.19516	4168.74	23.7281	3042.96	22.9167
4865909	2	2016-04-15	2015-04-16	365	1	55	2019-02-18	1960-12-07	58	-1	71.9	172.5	24.163	19.6451	1.10294	25.5406	23.1568	1.01955	1.05089	4.71767	19.2968	8.73766	57420	18.4822	8.28698	0.342962	1.02053	6.94034	54996.1	2189.21	2423.92	1.10721	1932.78	1873.78	0.969473	2.1454	0.791497	0.830167	0.630911	0.6381	0.839824	0.940001	1.19698	1.11019	1.11651	4245.54	23.8753	4034.45	21.0972
4866648	2	2016-09-23	2015-09-25	364	1	48	2019-02-18	1968-04-13	51	-1	66.6	170	23.045	21.9864	1.07558	24.0241	22.336	1.12949	1.27261	5.08112	18.0292	7.75336	52104.3	17.3328	7.40375	0.321274	0.928482	8.82137	50091.8	1964.23	2012.49	1.02457	1721.34	1548.53	0.899607	1.91016	0.723859	0.740226	0.595893	0.585237	0.721375	0.885079	1.11538	1.06223	1.06846	3926.64	24.1126	2734.47	24.3063
4878418	2	2016-09-18	2015-12-03	290	1	47	2019-02-18	1969-09-04	49	-1	76.4	176.5	24.5247	24.8223	1.34949	33.5846	24.8869	1.19808	1.26488	6.11324	18.5148	8.24298	57677.8	17.675	7.78919	0.317606	0.989413	10.4842	55061.7	2258.09	2616.08	1.15853	2015.6	2063.95	1.02399	2.27687	0.786788	0.817473	0.64858	0.661661	0.926272	1.14107	1.38086	1.16959	1.20138	4062.08	23.8444	3341.28	29.2321
4898931	2	2017-07-12	2016-08-17	329	1	58	2019-02-18	1958-07-28	61	0	74	169	25.9095	28.7416	1.01895	30.1521	29.5914	0.92902	1.05252	7.39338	18.3303	7.78124	52353	17.5009	7.33701	0.283179	0.808787	10.901	49984.4	2127.49	2368.61	1.11333	1879.42	1874.81	0.997548	1.99056	0.821796	0.838844	0.603545	0.624622	0.911983	1.00884	1.20654	1.16368	1.16878	3937.81	24.0955	3003.14	32.3817
4937992	2	2016-03-23	2015-05-15	313	1	53	2019-02-18	1963-03-01	56	-1	82	186	23.7022	22.2118	1.14304	26.5741	23.2486	1.15148	1.33008	5.20201	18.218	7.99018	63026.9	17.5035	7.58839	0.320156	1.10761	10.632	60555.2	2301.89	2471.72	1.07378	2049.45	1997.05	0.974433	1.88029	0.737108	0.751047	0.639474	0.569279	0.726108	0.920125	1.28257	1.21169	1.21189	3979.35	24.1201	3551.27	22.0824
4945373	2	2017-09-21	2016-09-14	372	1	46	2019-02-18	1971-05-09	48	-1	83.8	182.5	25.1604	24.533	1.29781	30.6865	23.6449	1.29625	1.43484	6.13625	18.876	8.49722	62869	18.1885	8.13432	0.323298	1.07678	11.0885	60579.2	2284.77	2289.81	1.0022	2014.8	1791.87	0.889353	1.84443	0.730733	0.722862	0.566827	0.579062	0.789887	0.934652	1.10942	1.04228	1.04864	4365.09	24.3241	3509.54	25.4999
5074353	2	2016-05-17	2015-10-22	208	1	52	2019-02-18	1964-05-10	55	-1	80.9	166	29.3584	25.7862	1.29386	29.9829	23.1731	1.16222	1.2314	7.58391	21.8268	9.7751	60146.1	20.9702	9.31349	0.317234	0.874171	8.02191	57785.4	2123.91	2360.69	1.11149	1882.21	1875.45	0.996408	2.00766	0.782474	0.809186	0.576595	0.625713	0.879034	0.98511	1.48976	1.18112	1.16732	4261.52	24.5313	4010.99	27.7198
5166040	2	2016-11-04	2015-11-02	368	2	46	2019-02-18	1970-06-18	49	-1	53.9	156	22.1483	38.5085	1.0081	41.3226	40.9905	0.938446	0.913854	8.49765	13.5693	5.90383	33022.2	12.8282	5.55899	0.25099	0.610809	16.5506	31218.7	1705.02	1803.53	1.05778	1482.04	1291.49	0.871432	2.29631	0.61602	0.649974	0.527817	0.54486	0.808876	1.07365	1.2078	1.01645	1.02676	3168.16	23.3462	1482	49.1349
5214581	2	2016-05-06	2015-05-19	353	1	50	2019-02-18	1964-07-18	55	-1	55.1	166	19.9956	20.5064	0.910854	21.2151	23.2915	0.881538	0.905338	4.13804	16.0412	7.18126	44203.2	15.3863	6.80057	0.340103	0.937187	7.68208	42398.6	1807.35	1804.65	0.998508	1570.43	1394.11	0.887726	1.73284	0.753166	0.750136	0.489986	0.498906	0.681761	0.740487	0.97098	1.09129	1.12727	3548.94	24.1485	2926.65	22.7746
5224275	2	2016-06-08	2015-11-06	215	1	53	2019-02-18	1963-04-20	56	-1	86.7	167	31.0875	27.7342	1.12863	29.7348	26.346	1.27337	1.58946	8.66092	22.5674	9.11488	62938.3	21.7209	8.663	0.278665	0.777168	9.5347	60577.3	2201.95	2361.01	1.07224	1952.69	1891.23	0.968529	1.88467	0.739316	0.795234	0.593172	0.586567	0.906735	0.976243	1.24222	1.19354	1.18432	4562.7	25.5064	3550.83	31.7788
5238003	2	2016-08-19	2015-08-04	381	1	40	2019-02-18	1976-05-26	43	-1	68.4	170	23.6678	21.098	1.09768	25.7701	23.4768	1.15241	1.08145	5.04755	18.8768	8.92758	54554	17.9814	8.43198	0.356264	1.0296	7.47269	51966.2	2189.21	2587.86	1.1821	1960.65	2084.9	1.06337	2.20059	0.78662	0.845049	0.610795	0.595629	0.841224	1.07773	1.31779	1.27501	1.29914	3782.26	23.8892	3451.16	22.3259
5242533	2	2018-05-21	2017-05-27	359	1	59	2019-02-18	1958-07-01	61	-1	60	172	20.2812	25.5523	1.07102	29.6981	27.7287	1.01026	1.11994	5.23887	15.2637	6.78309	45156.1	14.5909	6.42227	0.316661	0.93681	11.9402	43165.6	1980.48	1990.51	1.00507	1752.13	1577.93	0.90058	1.80678	0.70557	0.73243	0.510613	0.592626	0.761163	0.985268	1.15213	1.03728	1.08533	3222.3	23.9662	2510.15	26.6608
5242896	2	2017-09-29	2016-10-11	353	1	46	2019-02-18	1970-10-10	48	-1	67.2	174	22.1958	22.2331	1.20617	27.361	22.6842	1.24669	1.30182	4.96439	17.3644	7.99759	52572.4	16.493	7.52402	0.338984	1.02631	9.71322	49934.3	2177.26	2638.12	1.21167	1935.17	2119.55	1.09528	2.14198	0.867246	0.881729	0.673602	0.591395	0.930425	1.2024	1.54184	1.25387	1.33752	3680.06	23.7361	3365.84	21.6742
5243483	2	2017-05-23	2016-07-19	308	1	51	2019-02-18	1965-06-05	54	-1	76	170	26.2976	22.0571	1.13525	25.5034	22.465	1.09298	1.10867	5.95231	21.0336	9.65942	60787	20.2922	9.2577	0.352036	1.01739	7.03356	58644.6	2157.35	2142.42	0.993078	1897.34	1628.66	0.85839	1.97591	0.698059	0.718908	0.51107	0.492743	0.673095	0.855974	1.01553	1.06886	1.04155	4187.78	24.1764	3576.14	22.4804
5243667	2	2017-03-15	2016-05-05	314	1	48	2019-02-18	1968-10-26	50	-1	78.7	176	25.4068	23.9745	1.35611	31.5162	23.2402	1.17563	1.21117	6.10722	19.3665	8.87649	59989.8	18.5746	8.43717	0.332083	1.02866	9.27213	57536.7	2284.37	2453.11	1.07387	2038.3	1966.68	0.964866	1.97673	0.822381	0.8404	0.550425	0.581988	0.80356	0.891144	1.27198	1.15149	1.11744	3726.76	23.9295	3954.45	25.514
5244187	2	2017-09-29	2016-09-22	372	1	46	2019-02-18	1970-12-08	48	-1	75	170.5	25.7996	24.791	1.22473	30.4992	24.9028	0.965832	1.09327	6.49087	19.6915	8.6021	57243.6	18.8388	8.1534	0.316028	0.918703	8.81324	54764.9	2205.53	2478.65	1.12383	1935.57	1874.04	0.968212	2.23958	0.79291	0.806051	0.629428	0.594862	0.879141	0.904996	1.16719	1.14323	1.20351	4415.52	23.7857	3925.88	24.3271
5245476	2	2017-04-06	2016-07-13	267	1	55	2019-02-18	1962-12-12	56	-1	77.5	175.5	25.1621	22.5437	1.11858	26.1717	23.3974	1.05968	1.22617	5.56617	19.1244	8.26762	58903.5	18.4143	7.89787	0.313879	0.966756	8.94884	56716.6	2048.25	2186.87	1.06768	1796.6	1645.64	0.915974	2.15074	0.717124	0.75647	0.565725	0.560685	0.659451	0.828964	1.23086	1.12319	1.08208	4149.33	23.9623	3228.06	24.8715
5246064	2	2017-06-19	2016-05-19	396	1	53	2019-02-18	1964-06-25	55	-1	81.7	175	26.6776	28.3403	1.16684	33.1674	28.4251	1.0548	1.203	7.66676	19.3857	8.44345	59368.8	18.6278	8.04514	0.301569	0.923557	11.1445	57047.7	2172.09	2321.09	1.0686	1910.88	1770.82	0.926706	2.10662	0.736297	0.789619	0.533603	0.611925	0.837699	0.898453	1.21184	1.09037	1.09763	4384.72	24.204	3308.3	30.7021
5246078	2	2017-08-18	2016-09-19	333	1	58	2019-02-18	1959-02-09	60	-1	70.4	173.5	23.387	27.1346	1.08289	30.3012	27.9817	0.967414	1.11302	6.37983	17.1319	7.31166	51571	16.2903	6.88453	0.294375	0.886135	11.8745	49037.5	2159.34	2533.45	1.17325	1886.19	1831.09	0.970788	2.5713	0.762188	0.793431	0.639483	0.629139	0.873779	0.945607	1.09564	1.21961	1.1888	4286.66	23.482	3205.08	28.2564
5247417	2	2016-05-17	2015-08-13	278	1	53	2019-02-18	1963-03-10	56	0	71.9	168.5	25.3238	17.4117	1.11359	19.9855	17.9469	1.06903	1.33246	4.44061	21.0629	8.54558	59802.4	20.2203	8.11475	0.32044	0.9098	5.97271	57410	2097.23	2392.36	1.14072	1839.6	1876.46	1.02003	2.00254	0.821075	0.833099	0.605158	0.67374	1.02075	1.07163	1.26745	1.22656	1.18231	4240.46	23.8752	4053.95	18.1988
5250422	2	2018-05-28	2017-06-19	343	1	59	2019-02-18	1958-06-09	61	-1	65.9	163.5	24.6519	27.358	1.15734	31.9791	27.6315	0.984077	1.26626	6.72309	17.8514	7.1756	47720.9	17.1131	6.82511	0.27686	0.740108	10.7785	45747.3	1914.9	1973.6	1.03066	1652.18	1412.36	0.854848	2.13627	0.720732	0.719341	0.57331	0.536102	0.733184	0.884727	1.15633	1.02221	0.975283	3868.77	23.8054	2456.12	29.6333
5251176	2	2016-08-09	2015-07-06	400	1	51	2019-02-18	1965-01-25	54	-1	72.5	165	26.6299	20.0323	1.34808	26.6432	19.7639	1.1475	1.29525	5.36099	21.4007	9.27401	58263.5	20.3986	8.75222	0.328661	0.89478	6.41966	55535.2	2172.88	2728.36	1.25564	1929.59	2133.4	1.10562	2.44548	0.859445	0.919599	0.627067	0.637178	1.03924	1.22021	1.55339	1.26519	1.26123	4074.98	23.6084	3802.05	20.945
5251415	2	2016-06-15	2015-06-08	373	1	50	2019-02-18	1966-09-28	52	-1	67.5	161.5	25.8797	19.7419	1.12468	23.404	20.8095	0.915241	0.964595	5.16294	20.9893	9.33339	54744.8	20.0683	8.87589	0.342968	0.894537	5.44875	52342.6	1956.67	2402.21	1.2277	1717.36	1805.83	1.05151	2.4921	0.753319	0.844898	0.613015	0.581629	0.942791	1.04983	1.3975	1.21635	1.30494	4018.02	23.5011	3137.37	22.3665
5252304	2	2017-07-24	2016-04-26	454	1	37	2019-02-18	1979-12-11	39	-1	69.8	174.5	22.9226	19.2392	1.06167	21.9665	20.6905	1.11572	1.19518	4.42493	18.5746	8.29278	56560.1	17.7338	7.86487	0.343105	1.04476	7.58041	53999.8	2192.39	2560.36	1.16784	1940.74	2031.36	1.04669	2.10213	0.754097	0.766813	0.651023	0.705336	0.867569	1.16308	1.42231	1.25349	1.20658	3941.93	23.8836	3012.32	20.3226
5253665	2	2017-06-13	2016-05-18	391	1	56	2019-02-18	1961-10-09	57	-1	64.6	168.5	22.7527	19.2505	1.22553	24.6499	20.1137	1.0413	1.10194	4.44649	18.6516	8.29917	52956.1	17.9523	7.92395	0.348264	0.988801	6.786	50970.7	1970.61	1985.38	1.0075	1730.5	1554.06	0.898042	1.79636	0.731044	0.751105	0.564345	0.576344	0.904419	0.891807	1.14525	1.03122	1.04447	3776.71	24.2407	3336.42	20.4314
5253942	2	2017-06-08	2016-07-04	339	1	46	2019-02-18	1970-11-20	48	-1	72.8	176.5	23.3691	21.2346	1.15549	24.5914	21.2822	1.179	1.16788	4.91354	18.2258	8.54827	56777.6	17.3384	8.06834	0.345257	1.07555	8.66617	54013	2270.44	2764.5	1.21761	2024.36	2178.3	1.07604	2.3822	0.835865	0.864519	0.633024	0.683567	1.06659	1.08524	1.29489	1.28572	1.2485	3877.6	23.5429	3748.95	21.4128
5253956	2	2016-07-15	2015-10-08	281	1	41	2019-02-18	1975-03-07	44	-1	85.7	180.5	26.3043	24.5086	1.25272	30.9656	24.7187	1.10838	1.0332	6.45713	19.8892	9.33993	64799.5	19.0039	8.88163	0.33765	1.10007	9.26283	61915.3	2411	2884.15	1.19625	2113.15	2172.12	1.0279	2.39065	0.83628	0.827905	0.594649	0.592605	0.935246	1.1492	1.30298	1.18821	1.20355	5187.34	23.9971	4232.85	27.1154
5253966	2	2017-07-13	2016-07-01	377	1	43	2019-02-18	1973-08-13	46	-1	72.5	174	23.9464	24.7017	1.17109	27.9794	23.8917	1.02871	1.10749	5.92802	18.0704	8.08884	54709.9	17.118	7.61925	0.31818	0.963321	10.0262	51826.4	2234.6	2883.43	1.29035	1973.79	2166.03	1.0974	2.75063	0.801107	0.85349	0.704144	0.664784	0.937085	1.23683	1.69211	1.22806	1.23468	4314.99	23.3149	2914.04	25.4116
5254151	2	2016-08-25	2015-08-13	378	1	52	2019-02-18	1964-05-05	55	0	74.6	171	25.5121	29.8846	1.26174	37.358	29.6084	1.06508	1.1757	7.6071	17.8478	7.83172	52188.9	17.0971	7.42289	0.290955	0.850783	12.1947	49993.5	2207.13	2195.38	0.994679	1943.53	1718.44	0.884187	1.80935	0.660294	0.686943	0.501386	0.542743	0.761797	0.885511	1.11903	1.12511	1.07133	4033.38	24.2274	2891.91	33.3575
5254316	2	2017-05-23	2015-04-09	775	1	45	2019-02-18	1972-11-02	46	-1	81.9	172	27.6839	23.6294	1.33739	29.8782	22.3406	1.25634	1.19004	6.59354	21.3105	9.99884	63044.9	20.4602	9.54517	0.344792	1.02003	7.82017	60529.6	2170.89	2515.36	1.15867	1920.83	1989.38	1.03569	2.10342	0.79986	0.867749	0.578139	0.598037	0.871643	0.969512	1.30876	1.26371	1.24193	4249.42	24.2837	4101.37	27.3687
5255085	2	2017-05-10	2015-05-25	716	1	51	2019-02-18	1966-08-21	53	-1	70	167	25.0995	24.2576	1.0899	28.0826	25.7662	1.03243	1.07299	6.1793	19.2944	8.6446	53810.1	18.5525	8.25654	0.328952	0.917415	8.21905	51741	1986.93	2069.17	1.04139	1743.64	1554.69	0.891632	2.11469	0.74285	0.765015	0.56255	0.546764	0.750969	0.778904	1.04699	1.08348	1.07554	4016.78	24.1159	3353.21	27.3441
5268605	2	2016-08-31	2015-05-12	477	1	51	2019-02-18	1964-10-24	54	-1	68.5	166.5	24.7094	22.672	1.17601	27.3741	23.2771	1.22135	1.40811	5.5865	19.0541	7.97327	52822.1	18.2996	7.56772	0.306269	0.849046	8.68382	50730.5	2009.63	2091.63	1.0408	1752.8	1610.77	0.918972	1.87229	0.735571	0.769778	0.572154	0.54664	0.671345	0.832894	1.20664	1.13617	1.15077	3904.3	24.0888	2823.45	27.0113
5310712	2	2017-09-20	2015-11-09	681	1	52	2019-02-18	1965-07-01	54	-1	66.8	170	23.1142	21.9082	1.04103	24.873	23.8928	1.04707	1.10463	5.04991	18.0004	8.03215	52021.1	17.2601	7.62785	0.330007	0.953721	8.34105	49881.7	2085.68	2139.41	1.02576	1842.39	1651.76	0.896529	2.00441	0.737753	0.785715	0.535495	0.479964	0.693873	0.836364	1.12104	1.08349	1.123	4080.72	24.0781	3253.27	22.6247
5312532	2	2016-09-09	2015-07-27	410	1	51	2019-02-18	1964-10-13	54	-1	71.5	165.5	26.1042	22.5702	1.13098	26.3962	23.3393	1.17988	1.36135	5.90446	20.2559	8.65746	55481.5	19.3466	8.19233	0.313832	0.859594	7.9001	52990.9	2088.07	2490.59	1.19277	1849.16	1977.11	1.0692	2.14926	0.844108	0.882382	0.752231	0.692085	1.03135	1.04203	1.40511	1.24871	1.18796	4018.06	24.1548	3112.13	24.7143
5383241	2	2016-12-03	2015-07-13	509	2	10	2019-02-18	2006-05-30	13	-1	21.5	116.5	15.8411	21.4583	0.717078	22.1974	30.9553	0.682562	0.659558	3.30756	12.1064	5.13693	16431.1	11.615	4.92462	0.310875	0.421927	4.78946	15764.2	1035.27	666.878	0.644156	816.672	443.387	0.542919	1.02236	0.430469	0.562141	0.382776	0.376062	0.446949	0.615406	0.615354	0.633632	0.587704	2558.87	24.6526	874.058	21.5029
5512074	2	2016-10-12	2015-05-25	506	1	50	2019-02-18	1966-05-20	53	0	83.7	183	24.9933	21.3284	1.34604	28.0676	20.8521	1.27793	1.36861	5.44918	20.0998	9.06061	67312.1	19.1767	8.55417	0.342259	1.14619	8.9874	64221	2521.29	3091.14	1.22602	2274.02	2539.82	1.11688	2.22964	0.865931	0.819235	0.555629	0.547489	0.951304	1.25399	1.49699	1.3684	1.35172	4025.88	23.8413	4343.98	21.3148
5534985	2	2017-05-08	2016-05-18	355	1	50	2019-02-18	1966-12-22	52	0	71	169.5	24.7126	20.9057	1.2324	24.4907	19.8724	1.12738	1.16399	5.20896	19.7075	8.86951	56620	18.7989	8.38746	0.3394	0.975104	7.31949	54009.7	2156.56	2610.34	1.21042	1905.7	2041.28	1.07115	2.26848	0.814987	0.828395	0.660718	0.636489	0.970473	1.14295	1.29565	1.28902	1.29429	3971.19	23.8012	4117.97	21.2281
5537181	2	2017-09-25	2015-10-14	712	1	49	2019-02-18	1968-08-16	51	0	75	182	22.6422	21.2835	1.11239	26.3813	23.7158	0.919528	0.915934	4.86281	17.985	8.32535	59573.6	17.042	7.78332	0.343753	1.13865	8.63246	56449.8	2442.45	3123.77	1.27895	2186.02	2497.47	1.14247	2.4424	0.881209	0.955016	0.659438	0.690442	0.99982	1.11518	1.35859	1.35857	1.36155	4106.82	23.5165	3952.62	23.0562
5554790	2	2016-09-09	2015-10-09	336	1	54	2019-02-18	1961-10-04	57	-1	74.7	173	24.9591	20.8831	1.0108	22.1013	21.8652	1.06199	1.1287	5.18862	19.6574	8.62508	58832.7	18.8683	8.22178	0.32941	0.985892	7.58597	56470.8	2187.22	2361.87	1.07985	1905.3	1753.94	0.920559	2.15642	0.722501	0.72385	0.613829	0.64081	0.822839	0.886101	1.16702	1.12735	1.04541	4743.17	23.9104	3251.85	22.9467
5557899	2	2016-08-19	2015-05-08	469	1	38	2019-02-18	1978-07-25	41	-1	82.3	179.5	25.5429	21.5602	1.14301	25.3646	22.191	1.08033	1.01569	5.5132	20.058	9.52514	64627.2	19.0745	9.00751	0.352642	1.13622	7.78669	61458.4	2427.72	3168.82	1.30527	2177.26	2580.11	1.18503	2.35054	0.881806	0.964233	0.766013	0.719512	0.970691	1.41921	1.51208	1.40633	1.40945	4040.09	23.688	3872.85	25.0134
5571970	2	2017-09-08	2016-09-23	350	1	54	2019-02-18	1963-09-06	55	-1	68.8	172	23.2558	24.0517	1.14844	29.4916	25.6796	1.20614	1.33276	5.61263	17.7231	8.0109	52431.9	16.9127	7.55609	0.324912	0.96122	10.1462	50034.6	2170.89	2397.33	1.10431	1952.69	2002.64	1.02558	1.80883	0.699591	0.789971	0.534841	0.712995	0.838388	1.24106	1.35497	1.17685	1.22752	3373.33	24.221	2942.93	24.9158
5586579	2	2017-09-18	2016-09-01	382	1	53	2019-02-18	1964-04-09	55	-1	68.5	167	24.5617	22.6114	0.932375	22.7677	24.419	0.970194	1.03395	5.56852	19.0586	8.64568	53152.4	18.1874	8.19933	0.333826	0.931008	7.65247	50722.9	2146.2	2429.59	1.13204	1886.59	1842.2	0.976471	2.26254	0.760816	0.792254	0.654741	0.616244	0.904176	0.998307	1.20713	1.16079	1.1583	4006.74	23.5523	2952.68	20.9276
5589210	2	2016-09-22	2015-10-21	337	1	52	2019-02-18	1964-07-16	55	0	54.4	162.5	20.6012	23.975	1.30221	33.6122	25.8117	1.3888	1.56698	4.929	15.6299	6.80268	41272.7	14.9243	6.43103	0.312168	0.824318	11.0835	39409.4	1826.46	1863.33	1.02018	1572.82	1378.69	0.876573	1.91071	0.74256	0.774741	0.512319	0.484061	0.750188	0.885351	1.02448	1.06581	1.05523	3789.4	23.9402	2286.96	22.9568
5613166	2	2016-09-20	2015-09-22	364	1	51	2019-02-18	1965-03-06	54	0	79.4	171.5	26.9956	25.2103	1.26137	32.7161	25.9369	1.26068	1.31435	6.80814	20.1973	9.3165	59404.8	19.4244	8.91738	0.330328	0.971568	9.12016	57131.6	2112.76	2273.11	1.0759	1854.34	1746.27	0.941724	2.03868	0.707898	0.763936	0.504318	0.604722	0.863639	0.928865	1.19753	1.151	1.14243	4282.1	24.2252	3978.82	25.7286
5661531	2	2016-08-19	2015-11-03	290	1	38	2019-02-18	1977-11-08	41	-1	78.5	182	23.6988	19.1585	0.928259	20.2732	21.84	0.880239	0.858086	4.59718	19.3983	9.24139	64255	18.4403	8.72426	0.36813	1.21939	6.80886	61081.5	2487.45	3173.54	1.27582	2235.79	2528.02	1.1307	2.56514	0.831362	0.918078	0.68291	0.691415	0.951683	1.21097	1.42031	1.3485	1.29601	4132.39	23.4148	4224.51	19.4017
5720506	2	2016-05-18	2015-06-30	323	1	47	2019-02-18	1968-10-13	50	-1	70.1	166	25.4391	25.5648	1.24272	30.8248	24.8043	1.21899	1.38887	6.47344	18.8483	8.06746	51938.3	18.1488	7.70829	0.303009	0.834973	9.71359	50011	1888.18	1927.35	1.02074	1660.82	1495.05	0.900187	1.90138	0.736591	0.74912	0.544482	0.551165	0.873038	0.954143	1.13833	1.06794	1.04387	3855.41	24.4548	3067.29	29.0046
5720514	2	2016-06-22	2015-06-24	364	1	59	2019-02-18	1957-02-06	62	-1	74.9	176.5	24.0432	22.3842	1.18505	27.5563	23.2533	1.20322	1.24493	5.38505	18.6723	8.47273	58168.3	17.8272	8.02555	0.333797	1.03985	9.18216	55535.8	2262.47	2632.51	1.16355	2027.15	2010.36	0.991717	2.6438	0.805877	0.830339	0.616531	0.579325	0.86606	1.00878	1.32386	1.14961	1.12507	3856.15	23.3834	3774.86	23.4519
5720529	2	2017-04-07	2016-05-05	337	1	55	2019-02-18	1962-12-13	56	-1	63.1	161.5	24.1927	22.2151	1.20992	26.9532	22.2768	1.0039	1.21717	5.3094	18.5906	7.78765	48488.5	17.9494	7.46378	0.308514	0.804673	7.72948	46816.2	1726.52	1672.3	0.968593	1490.4	1225.25	0.822098	1.89327	0.699602	0.742801	0.590413	0.560503	0.684126	0.681287	0.899463	0.954828	1.01797	3643.88	24.0885	2670.43	22.4512
5720531	2	2016-03-16	2015-06-04	286	1	47	2019-02-18	1968-05-28	51	-1	73	169	25.5593	20.8245	1.01701	23.9715	23.5706	1.02387	1.07034	5.20658	19.7956	8.97016	56538.2	18.9999	8.53079	0.333764	0.953264	6.92573	54265.5	2042.68	2272.71	1.11261	1799.79	1821.21	1.0119	1.85886	0.732749	0.791975	0.593841	0.581059	0.805317	0.925484	1.28892	1.32821	1.25438	3919.94	24.1787	3403.73	23.2535
5720540	2	2016-04-27	2015-04-09	384	1	43	2019-02-18	1972-06-23	47	-1	72.1	167	25.8525	28.0308	1.05924	32.2558	30.452	1.09739	1.13502	7.30902	18.7659	8.39449	52336.2	17.8898	7.94068	0.307154	0.85662	10.1696	49892.8	2098.42	2443.42	1.16441	1852.74	1888.49	1.01929	2.25876	0.750612	0.808076	0.586149	0.657898	0.835439	1.07947	1.50056	1.19497	1.18738	3944.84	23.8186	3244.74	32.6897
5720551	2	2016-07-26	2015-10-22	278	1	50	2019-02-18	1966-03-28	53	-1	84.5	170	29.2388	21.6697	1.14157	25.6705	22.487	1.05735	1.1506	6.45424	23.3304	10.4018	67424.9	22.3052	9.84039	0.336553	0.972638	6.39118	64462	2295.12	2962.89	1.29095	2070.55	2438.3	1.17761	2.33591	0.82109	0.912718	0.559087	0.623229	1.03531	1.1917	1.59708	1.40372	1.38341	3693.25	23.7092	4273.29	23.2911
5720553	2	2017-07-11	2015-06-26	746	1	56	2019-02-18	1961-06-11	58	0	66.8	168.5	23.5275	25.7697	1.44031	36.0154	25.0053	1.27123	1.33668	6.13187	17.663	8.02881	50149.3	16.9511	7.65185	0.325229	0.923399	10.4576	48127.9	1994.89	2021.39	1.01328	1751.21	1581.44	0.903055	1.8054	0.727175	0.749085	0.593112	0.600517	0.845755	0.95803	1.15469	1.04135	1.06817	3737.43	24.4261	3156.73	28.1475
5720557	2	2017-03-07	2016-06-02	278	1	51	2019-02-18	1964-09-29	54	-1	78.6	172.5	26.4146	23.3016	1.04374	25.1618	24.1073	0.994109	1.18993	5.84174	19.2283	8.19594	57216.3	18.4013	7.77994	0.294532	0.876416	8.94173	54755.5	2093.25	2460.86	1.17562	1845.97	1846.55	1.00031	2.48438	0.821702	0.828309	0.638409	0.595511	0.770108	0.881397	1.48065	1.17969	1.19734	4158.3	23.5869	3224.12	24.2698
5720576	2	2016-05-11	2015-05-26	351	1	55	2019-02-18	1960-09-10	58	-1	75.3	171	25.7515	24.6768	1.21064	30.1612	24.9133	1.04985	1.12156	6.31795	19.2849	8.56246	56390.9	18.3998	8.07469	0.313562	0.916886	9.05249	53802.7	2182.44	2588.14	1.1859	1929.19	2015.4	1.04469	2.26162	0.838403	0.844601	0.647362	0.61875	0.918997	0.965659	1.27912	1.28512	1.22678	4072.44	23.838	3996.48	25.8155
5720577	2	2016-06-24	2015-04-17	434	1	58	2019-02-18	1958-08-20	61	0	68.9	170	23.8408	21.6021	1.27167	28.3356	22.2823	1.08478	1.24261	5.16528	18.7457	8.14179	54175.1	17.944	7.7183	0.323743	0.935617	8.28392	51858.1	2077.32	2317.04	1.1154	1840.4	1755.99	0.954135	2.3681	0.801141	0.796286	0.566506	0.578937	0.847127	0.915408	1.04976	1.16239	1.18925	3882.46	23.7008	3588.55	22.1329
5720578	2	2016-08-12	2015-06-12	427	1	49	2019-02-18	1966-12-02	52	-1	64.2	162	24.4627	18.9237	1.02368	22.4034	21.8852	0.927616	1.08442	4.59565	19.6895	8.28605	51673.3	18.9746	7.91815	0.323682	0.849472	5.89074	49796.8	1999.27	1876.43	0.938557	1746.03	1418.04	0.812152	1.81007	0.716893	0.715569	0.559742	0.514979	0.623849	0.73019	0.953641	0.976404	0.985354	3802.84	24.0916	2692.02	21.2207
5720580	2	2016-08-10	2015-04-21	477	1	51	2019-02-18	1965-08-12	54	-1	90.6	174.5	29.7535	23.7517	1.16581	28.9167	24.804	1.15215	1.20321	7.0857	22.7467	10.5769	69264.2	21.8565	10.1107	0.339818	1.03475	7.59967	66553.5	2294.33	2710.77	1.18151	2041.08	2083	1.02054	2.47891	0.826105	0.860715	0.615989	0.68859	0.983922	1.03101	1.25654	1.20134	1.2054	4352.68	23.8641	4136.49	23.7371
5720587	2	2016-06-06	2015-06-02	370	1	53	2019-02-18	1963-05-27	56	0	92	178	29.0367	25.5836	1.1971	30.0318	25.0872	1.1278	1.23174	7.38339	21.4764	9.27735	68046	20.6222	8.83553	0.304288	0.964106	9.43133	65339.3	2293.13	2706.69	1.18035	2029.54	2082.78	1.02624	2.36691	0.869636	0.83159	0.668239	0.649906	0.979406	1.20888	1.42924	1.14383	1.11901	4937.48	24.4105	4507.91	27.2954
5721706	2	2016-08-05	2015-07-21	381	1	53	2019-02-18	1963-01-11	56	-1	71.9	175	23.4776	26.7863	0.948268	27.3762	28.8697	0.967712	0.96006	6.32758	17.2949	7.94059	52965.5	16.4983	7.51812	0.320226	0.980692	10.7661	50526.1	2163.33	2439.37	1.1276	1940.34	1927.01	0.993128	2.29776	0.744438	0.784909	0.639831	0.637731	0.922144	1.03306	1.36098	1.12025	1.17556	3899.63	23.9405	3515.96	29.5907
5721711	2	2016-08-15	2015-08-18	363	1	46	2019-02-18	1970-09-26	48	-1	56.9	184.5	16.7155	15.0531	0.96499	15.3221	15.878	0.917556	1.00459	2.52879	14.2704	6.31781	48576.7	13.6291	5.98587	0.358103	1.21899	7.83275	46393.8	2202.75	2182.89	0.990986	1950.7	1711.13	0.877192	1.87168	0.693869	0.722285	0.511357	0.54151	0.871359	1.01643	0.998215	1.04491	1.02096	3483.4	23.8288	2875.72	14.5799
5721713	2	2017-09-06	2016-09-12	359	1	59	2019-02-18	1958-02-12	61	0	74.2	175.5	24.0907	23.5191	1.14657	27.4444	23.936	1.00143	1.09016	5.67696	18.4606	8.05099	56859.2	17.5788	7.57783	0.314554	0.968834	9.43138	54143.1	2239.78	2716.14	1.21268	1987.33	2196.85	1.10543	2.05705	0.838341	0.854348	0.667405	0.646075	1.15604	1.23989	1.36804	1.28035	1.30188	4169.8	24.1377	3883.63	25.6879
5721715	2	2017-09-13	2015-07-31	775	1	54	2019-02-18	1963-09-11	55	-1	86.3	170	29.8616	28.7259	1.26278	33.662	26.6571	1.17479	1.50153	8.5426	21.1957	8.68852	61255.7	20.3798	8.30113	0.277987	0.803382	10.7023	58897.8	2109.57	2357.95	1.11774	1838.81	1746.79	0.949956	2.25717	0.755296	0.754195	0.630426	0.623263	0.968273	1.12525	1.20081	1.08841	1.1496	4867.64	24.2599	3558.26	29.1818
5721719	2	2016-05-11	2015-10-15	209	1	53	2019-02-18	1963-08-22	56	-1	87.2	169	30.5311	28.9146	1.0864	31.0933	28.6205	1.00769	1.03858	8.93792	21.9736	9.73052	62758.7	21.0549	9.24495	0.302804	0.864839	8.87115	60134.9	2236.19	2623.82	1.17334	1986.93	2032.44	1.0229	2.37254	0.825691	0.859735	0.550377	0.629443	0.919054	1.03447	1.25513	1.21497	1.26496	4568.42	24.6152	3830.83	33.7475
5721720	2	2017-04-06	2016-08-10	239	1	51	2019-02-18	1965-04-29	54	0	102.1	177.5	32.4063	24.9778	1.43495	31.8154	22.1717	1.32996	1.49098	8.11605	24.377	10.8317	76802.8	23.5418	10.362	0.319753	1.00742	8.33271	74171.4	2386.31	2631.39	1.10271	2133.86	2160.38	1.01243	1.86579	0.796089	0.788904	0.629399	0.616966	0.820576	0.990337	1.30996	1.25607	1.19876	4486.49	24.8578	3941.94	28.265
5721728	2	2016-05-16	2015-06-29	322	1	53	2019-02-18	1963-10-27	55	0	73.6	172	24.8783	19.1268	0.98235	22.023	22.4187	1.07287	1.01124	4.74154	20.0485	9.25325	59311.6	19.0554	8.71856	0.350448	1.03677	6.35845	56373.6	2244.95	2938.01	1.30872	1986.13	2341.22	1.17878	2.30583	0.856217	0.943247	0.677096	0.703421	0.933922	1.12432	1.63618	1.39975	1.38415	4134.77	23.5892	3327.39	24.6943
5721730	2	2017-09-05	2015-09-24	712	1	45	2019-02-18	1972-01-28	47	-1	72	172	24.3375	22.7072	0.952495	23.9312	25.1248	0.881577	0.903658	5.51877	18.7853	8.59407	55574.4	17.8661	8.11034	0.333245	0.985872	7.83237	52855.2	2281.19	2719.24	1.19203	2023.96	2195.99	1.08499	2.03421	0.810486	0.865333	0.638861	0.634645	0.90168	1.12353	1.44485	1.26885	1.21867	3961.94	23.868	3047.23	23.8251
5721731	2	2016-09-02	2015-09-11	357	1	58	2019-02-18	1958-05-20	61	-1	63.7	169	22.3031	23.6866	0.996795	26.0558	26.1396	0.903265	1.07673	5.24873	16.9104	6.98854	48297.7	16.1806	6.61795	0.296727	0.847483	9.78377	46213.5	2022.37	2084.22	1.03058	1774.3	1500.51	0.845688	2.35303	0.691944	0.745833	0.529078	0.54646	0.769374	0.753196	1.04786	1.0215	0.971694	4021.94	23.5922	2896.51	26.4666
5721733	2	2016-08-17	2015-10-16	306	1	53	2019-02-18	1963-04-09	56	-1	72.7	170	25.1557	27.9449	1.1138	30.6304	27.501	1.05436	1.0478	6.97736	17.9909	8.00836	51993.8	17.3624	7.66487	0.304697	0.880575	10.5161	50177.4	1996.09	1816.41	0.909983	1744.44	1400.27	0.802707	1.65362	0.638623	0.683384	0.456191	0.465175	0.7558	0.819688	0.997187	0.967642	0.952039	3840.53	24.697	3048.24	33.3512
5721736	2	2016-09-02	2015-09-14	354	1	57	2019-02-18	1959-05-21	60	-1	92.2	173.5	30.6289	31.376	1.23968	38.4522	31.018	1.13467	1.36027	9.56412	20.9182	9.24274	62968.4	20.1314	8.80331	0.287418	0.865193	11.5162	60599.9	2200.36	2368.43	1.07638	1962.64	1972.63	1.00509	1.66501	0.737277	0.812047	0.672461	0.663144	0.971362	1.02255	1.38781	1.17724	1.17257	3989.22	25.1078	3479.98	29.3422
5721738	2	2016-09-23	2015-09-22	367	1	48	2019-02-18	1968-07-16	51	-1	69.4	166.5	25.034	22.9419	1.13885	26.4815	23.2529	1.14375	1.16935	5.75602	19.3335	8.7977	53596.8	18.3908	8.33359	0.33289	0.922847	7.93211	50983.5	2151.78	2613.39	1.21453	1915.66	2070.14	1.08064	2.30073	0.776594	0.839074	0.69529	0.711871	0.95362	1.2318	1.56513	1.20582	1.22203	3722.12	23.6546	2958.93	25.3843
5721740	2	2016-09-20	2015-10-23	333	1	41	2019-02-18	1975-11-27	43	-1	57.3	157.8	23.0113	25.4756	1.21993	30.8746	25.3085	1.28288	1.40651	5.78198	16.9142	7.37102	42117.8	16.1482	6.99777	0.304102	0.75724	9.91546	40210.5	1789.03	1907.3	1.0661	1545.74	1423.69	0.921039	1.98778	0.772255	0.797574	0.60775	0.610596	0.808323	0.897817	1.29318	1.07857	1.05108	3786.78	23.9794	2230.92	27.0373
5721742	2	2016-08-03	2015-10-09	299	1	42	2019-02-18	1974-07-28	45	-1	57.9	162	22.0622	22.623	0.99546	27.1954	27.3194	0.862078	0.883922	5.01406	17.1495	7.44082	45007.2	16.3101	7.02867	0.318584	0.836093	7.74625	42804.2	1965.43	2203.01	1.12088	1691.88	1571.79	0.92902	2.30749	0.782678	0.796525	0.573401	0.597399	0.813203	0.951897	1.187	1.0789	1.07621	4215.85	23.5094	2980.04	26.3473
5721746	2	2016-07-25	2015-07-24	367	1	56	2019-02-18	1960-12-23	58	-1	80	173	26.7299	25.9729	1.33701	32.5225	24.3248	1.125	1.21827	6.80607	19.3984	8.53378	58057.5	18.5488	8.06083	0.301566	0.902556	9.94895	55514.7	2318.22	2542.89	1.09691	2076.52	2065.89	0.994878	1.97356	0.751121	0.745918	0.514508	0.551535	0.870675	0.954982	1.25775	1.28061	1.26993	3732.85	24.1027	3254.73	30.3255
5721748	2	2016-05-05	2015-05-26	345	1	58	2019-02-18	1958-05-28	61	-1	64.4	160	25.1562	24.1822	1.13907	26.9792	23.6854	1.08753	1.28087	6.06431	19.0132	7.82973	48673.9	18.2658	7.43878	0.295703	0.757	8.40865	46760.6	1839.21	1913.3	1.04029	1609.85	1463.83	0.909296	1.95973	0.731118	0.752971	0.53889	0.554358	0.862428	0.953945	1.03946	1.10678	1.11945	3755.89	24.2564	2829.55	27.9429
5721749	2	2016-04-12	2015-04-02	376	1	51	2019-02-18	1965-10-11	53	0	68	170	23.5294	22.603	1.10916	25.6812	23.1538	0.985306	1.01147	5.29948	18.1465	8.19999	52443.2	17.5087	7.83924	0.333168	0.962855	8.15138	50600.3	1998.48	1842.98	0.92219	1727.71	1472.76	0.852434	1.36729	0.698567	0.723344	0.438448	0.478308	0.651884	0.74373	1.06553	1.04276	1.06307	3873.09	24.7558	3323.4	23.9482
5721750	2	2016-09-27	2015-09-29	364	1	45	2019-02-18	1971-08-06	48	-1	57.7	162	21.986	24.0991	1.03633	26.176	25.2585	1.23172	1.19515	5.28829	16.6557	7.6657	43711.2	15.8671	7.24807	0.329668	0.86518	9.33277	41641.7	1900.92	2069.44	1.08865	1666	1533.51	0.920478	2.28126	0.777417	0.782044	0.483706	0.516176	0.748876	0.798217	1.03777	1.17025	1.13805	3555.93	23.5996	2494.88	28.0296
5721758	2	2016-09-06	2015-10-16	326	1	53	2019-02-18	1963-01-25	56	-1	92.5	172.5	31.0859	27.1739	1.06475	31.2495	29.3492	1.09468	1.18353	8.46514	22.6866	10.1504	67506.7	21.7945	9.67811	0.311334	0.926414	8.66849	64852.2	2283.58	2654.54	1.16245	2027.15	2101.57	1.03671	2.15644	0.821963	0.843279	0.640107	0.629047	1.03175	1.06138	1.54223	1.196	1.16696	4577.18	24.4661	4152.04	28.2885
5721760	2	2016-04-21	2015-04-15	372	1	53	2019-02-18	1963-09-17	55	0	69.4	173	23.1882	23.8419	1.21269	31.726	26.1617	1.18621	1.1098	5.52655	17.6534	8.40233	52835	17.0181	8.01751	0.345758	1.03482	9.40248	50933.5	1996.09	1901.44	0.952582	1756.78	1522.32	0.866539	1.58423	0.730414	0.735455	0.461112	0.476295	0.664421	0.780267	1.01674	1.04128	1.04822	3731.44	24.4446	3584.91	26.2427
5721765	2	2017-06-09	2016-06-16	358	1	46	2019-02-18	1971-04-05	48	-1	78	180	24.0741	23.0413	1.28461	29.8701	23.2523	1.20807	1.23084	5.57298	18.6139	8.7964	60309.1	17.6954	8.30543	0.344995	1.11778	9.77102	57333.2	2428.52	2975.92	1.22541	2145.81	2359.47	1.09957	2.18051	0.864273	0.878602	0.734368	0.769305	1.01161	1.14782	1.3684	1.26141	1.26354	4048.77	23.4907	3359.52	21.5796
5721769	2	2016-08-17	2015-04-15	490	1	46	2019-02-18	1970-06-06	49	-1	71.5	169	25.0341	23.5053	1.18119	29.1217	24.6546	1.13139	1.22275	5.87135	19.1075	8.48794	54572.9	18.2061	8.03306	0.320884	0.916478	8.69125	51998.5	2074.13	2574.41	1.2412	1843.19	1971.56	1.06965	2.61036	0.800762	0.845752	0.667815	0.705541	1.0142	1.30645	1.35845	1.26667	1.22827	3794.59	23.4491	3482.71	24.7913
5721770	2	2016-08-30	2015-11-11	293	1	36	2019-02-18	1980-10-31	38	-1	85.6	179	26.7158	24.9405	1.13392	30.8328	27.1913	1.13181	1.17254	6.66719	20.0652	9.20223	64290.8	19.2541	8.73156	0.326832	1.0472	9.5526	61692	2246.94	2598.8	1.15659	2003.26	2130.54	1.06354	1.92154	0.845411	0.845267	0.602028	0.583151	0.809286	0.966997	1.24865	1.36092	1.29577	4042.81	24.3636	3864.01	26.2091
5721773	2	2017-04-17	2015-10-15	550	1	46	2019-02-18	1970-05-09	49	-1	61.2	167	21.9441	18.9594	1.15355	22.1114	19.168	0.979513	1.02066	4.14396	17.713	7.70521	49399.9	16.9016	7.31713	0.333444	0.929941	6.85051	47136.8	1912.87	2263.09	1.18309	1661.22	1558.78	0.938335	2.79875	0.754411	0.799323	0.584243	0.596399	0.817114	0.888931	1.11661	1.15069	1.11224	4247.6	23.323	3373.18	22.1853
5721776	2	2017-09-26	2016-09-08	383	1	52	2019-02-18	1965-06-26	54	-1	78.8	177	25.1524	28.3931	1.2607	34.7568	27.5695	1.06368	1.31807	7.15285	18.0393	7.49433	56515.4	17.3618	7.12952	0.283453	0.888029	12.9164	54392.9	2109.57	2122.49	1.00612	1847.97	1663.68	0.900279	1.75381	0.726237	0.758208	0.53625	0.522978	0.797502	0.909858	1.10521	1.07887	1.09528	4412.35	24.7606	3298.92	29.1358
5721777	2	2017-09-26	2016-09-08	383	1	55	2019-02-18	1962-06-12	57	-1	75.4	167	27.0357	26.0035	1.23965	31.5601	25.4588	1.09348	1.16509	7.08538	20.1624	9.21177	56231	19.4142	8.81825	0.32617	0.909655	8.6169	54144.3	2060.2	2086.69	1.01286	1831.24	1600.18	0.873822	2.1249	0.719658	0.727662	0.525293	0.506347	0.766885	0.928225	1.00354	1.08989	1.03938	4000.35	24.3953	3585.94	24.987
5721780	2	2016-08-11	2015-07-23	385	1	53	2019-02-18	1963-05-27	56	0	72	178.5	22.5973	25.2931	1.16834	29.5559	25.2974	1.05545	1.18209	5.68142	16.7809	7.26936	53467.6	16.1476	6.94059	0.307143	0.978626	11.7978	51449.9	2075.33	2017.69	0.972228	1843.59	1537.38	0.833908	2.0726	0.693829	0.743442	0.494084	0.485081	0.739951	0.79751	1.03407	1.00477	0.986602	3888.46	24.1083	3016.27	27.8209
5721782	2	2016-08-10	2015-10-13	302	1	56	2019-02-18	1960-03-09	59	-1	96.5	168	34.1908	31.531	1.11113	35.942	32.3473	0.988794	1.16486	10.8007	23.4536	9.94408	66195.4	22.5942	9.45522	0.276543	0.780515	9.42323	63769.9	2208.32	2425.51	1.09835	1971.8	1980.78	1.00455	1.8803	0.768676	0.801987	0.591956	0.60507	0.874649	0.987343	1.2383	1.27458	1.24514	4259.19	25.3439	3925.84	33.5837
5721784	2	2016-08-03	2015-09-28	310	1	51	2019-02-18	1965-10-28	53	-1	56.9	172	19.2334	21.3822	0.894118	22.1623	24.7867	0.81217	0.777207	4.08606	15.0236	6.86385	44445.8	14.3904	6.53227	0.339632	1.00477	8.57278	42572.5	1945.52	1873.26	0.962859	1691.88	1409.91	0.833338	1.82681	0.63837	0.650289	0.515928	0.537101	0.719515	0.863917	1.04514	0.992949	0.996408	3655.89	23.9563	2618.53	25.5355
5721793	2	2017-05-19	2016-08-17	275	1	49	2019-02-18	1967-09-06	51	-1	66.5	173	22.2193	23.5674	1.3758	30.9469	22.4939	1.15088	1.23727	5.19455	16.8467	7.38766	50420.6	16.1412	7.02616	0.316219	0.946413	10.3781	48309	1958.66	2111.64	1.07811	1747.22	1642.51	0.94007	2.21878	0.7584	0.791721	0.576434	0.587022	0.804392	1.03308	1.2032	1.11408	1.08268	3511.39	23.894	2955.94	26.0395
5723229	2	2017-07-17	2016-07-04	378	1	44	2019-02-18	1972-08-27	47	-1	78.7	170	27.2318	27.3813	1.3527	34.4236	25.448	1.18049	1.32624	7.47657	19.8288	8.62531	57305.2	19.0773	8.21763	0.301766	0.872102	10.156	55133.3	2129.08	2171.93	1.02012	1906.9	1749.24	0.917322	1.90242	0.728314	0.809107	0.508313	0.486235	0.741708	0.877503	1.29109	1.12336	1.08436	3723.7	24.3662	3502.57	30.9858
5730507	2	2016-04-27	2015-07-01	301	1	43	2019-02-18	1972-05-09	47	-1	78.5	172.5	26.381	21.5292	1.34847	25.6807	19.0443	1.40171	1.52458	5.66729	20.6564	8.95895	61465.7	19.7505	8.48594	0.321668	0.957165	8.24331	58770.1	2250.53	2695.6	1.19777	1995.69	2112.67	1.05862	2.28747	0.74918	0.775755	0.593719	0.622903	0.876283	1.12404	1.34103	1.33072	1.3268	4438.49	24.0894	3288.79	23.7879
5730510	2	2016-07-13	2015-07-29	350	1	53	2019-02-18	1962-12-23	56	-1	67.9	165.5	24.7898	22.6477	1.38896	31.6661	22.7984	1.34408	1.18271	5.60064	19.1287	9.21036	52394.1	18.1982	8.7299	0.352156	0.964565	7.79453	49845.3	2148.19	2548.72	1.18645	1888.98	1915.56	1.01407	2.44259	0.794687	0.779643	0.629723	0.705439	0.955313	1.0417	1.28397	1.20415	1.18038	4090.66	23.5948	4083.38	24.4146
5730513	2	2016-05-05	2015-09-16	232	1	48	2019-02-18	1967-11-23	51	-1	80.3	171.5	27.3015	26.0691	1.15661	29.9161	25.8653	0.972112	1.01602	7.16437	20.3179	8.91303	59759.5	19.4703	8.46184	0.30994	0.911602	8.80662	57266.5	2144.61	2493.04	1.16247	1888.18	1964.94	1.04065	2.05946	0.759831	0.799901	0.572453	0.585683	0.951392	1.081	1.35259	1.20069	1.29185	4335.39	24.4727	3688.18	30.236
5730521	2	2016-07-20	2015-06-12	404	1	50	2019-02-18	1966-02-16	53	-1	69.9	166.5	25.2144	22.0325	1.33509	26.8729	20.1281	1.17479	1.4	5.6341	19.9376	8.50725	55271.6	19.3029	8.17808	0.324342	0.899148	7.84631	53511.9	1839.21	1759.72	0.95678	1590.34	1312.74	0.825448	1.79605	0.698423	0.717991	0.497752	0.474362	0.752299	0.716751	0.964857	1.00026	1.02925	3749.46	24.1575	3193.17	22.1601
[truncated: 488 more rows]
[truncated: 223 more columns]
